# Supplementary material for: Integrated transcriptomic and proteomic analysis of pathogenic mycobacteria and their esx-1 mutants reveal secretion-dependent regulation of ESX-1 substrates and WhiB6 as a transcriptional regulator
Source: PubMed Central journal article supplement (PMC6343904; doi:10.1371/journal.pone.0211003), 2019-01-23
Supplement: pone.0211003.s015.pdf [file pone.0211003.s015.pdf]

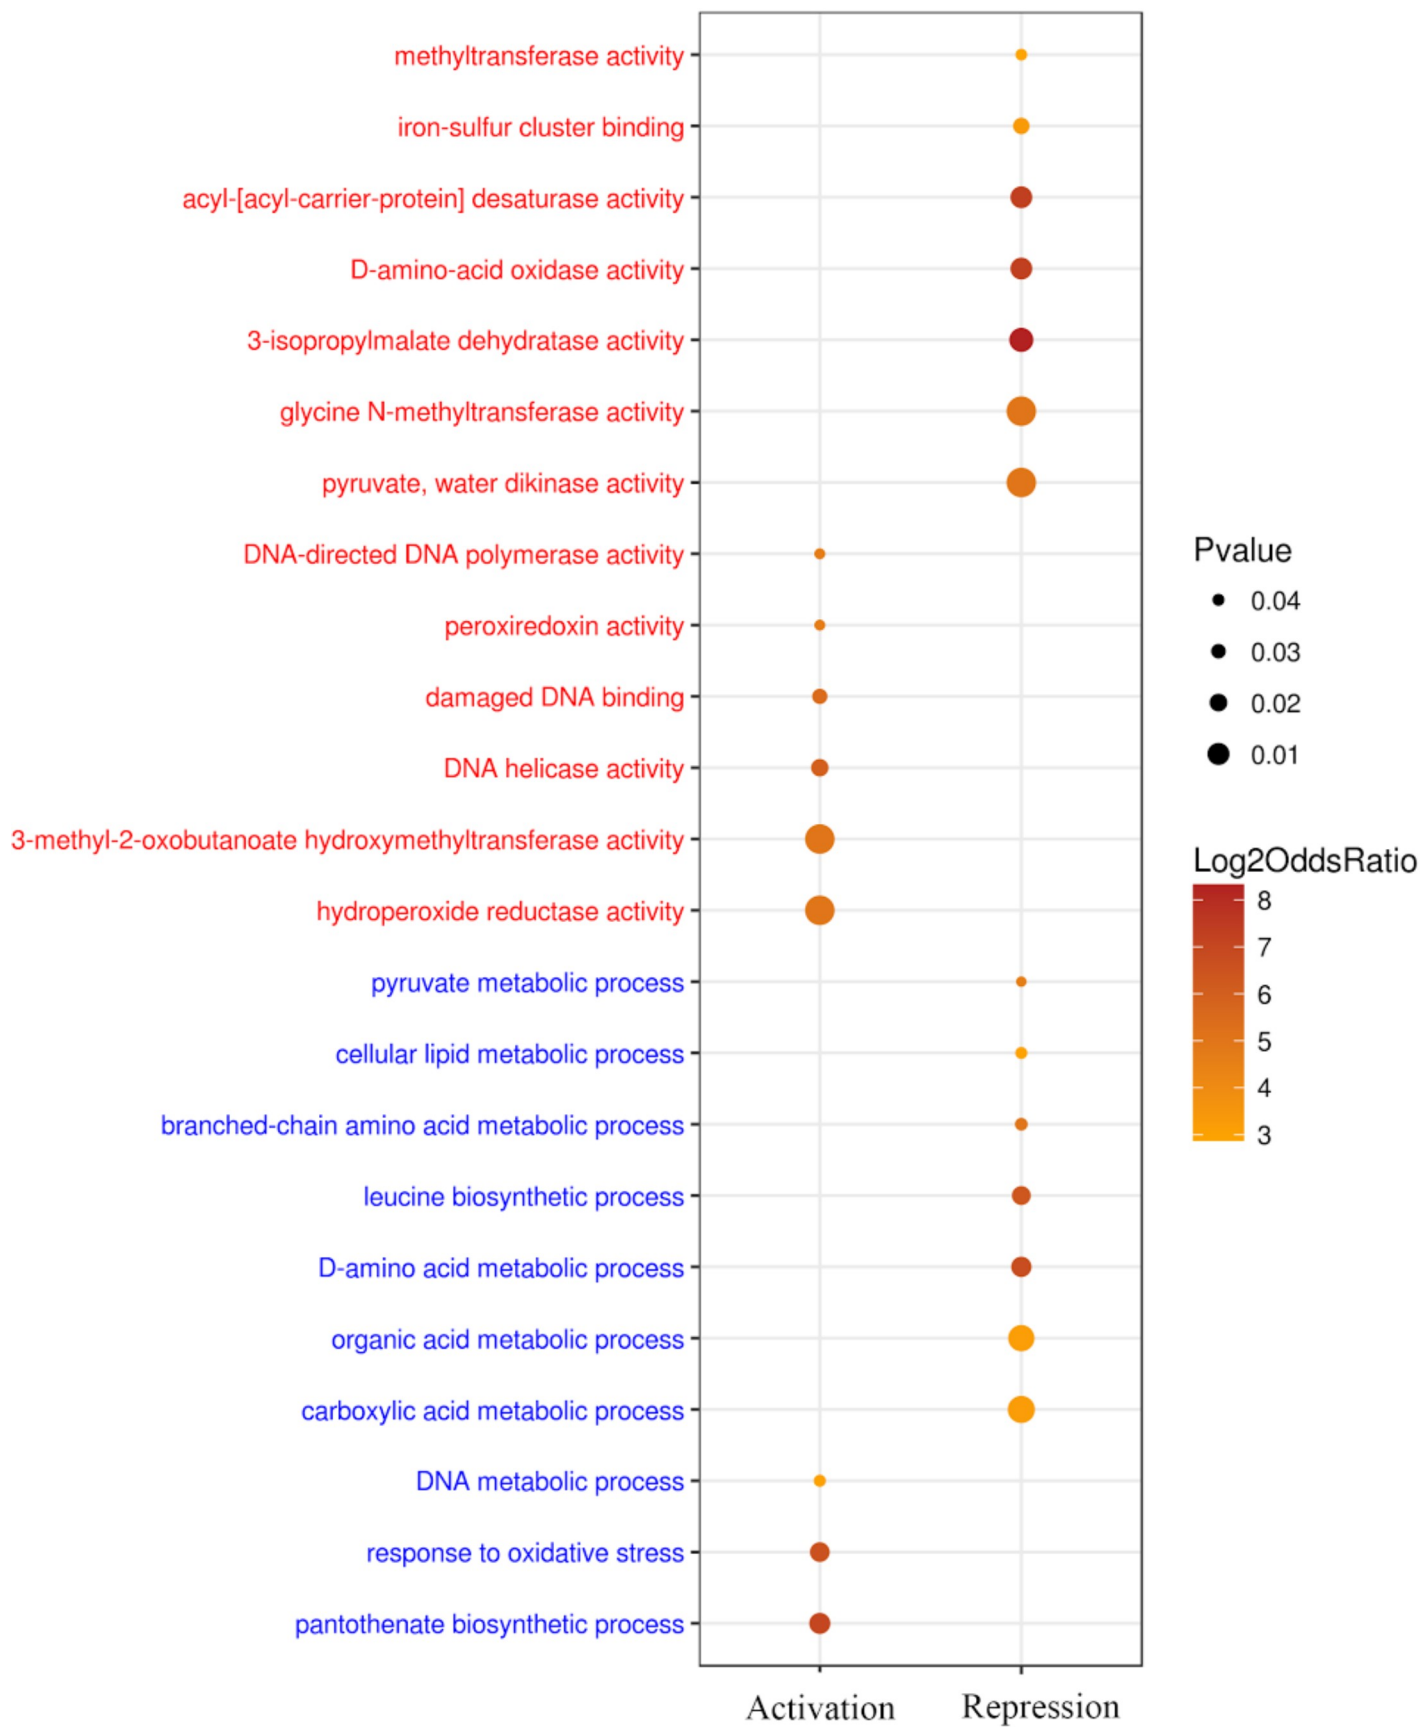

S7 Fig
