# Supplementary material for: Integrated transcriptomic and proteomic analysis of pathogenic mycobacteria and their esx-1 mutants reveal secretion-dependent regulation of ESX-1 substrates and WhiB6 as a transcriptional regulator
Source: PLoS One. 2019 Jan 23;14(1):e0211003. doi: 10.1371/journal.pone.0211003 (PMC6343904; doi:10.1371/journal.pone.0211003)
Supplement: S1 Table — P<0.05. (XLSX) [file pone.0211003.s001.xlsx]

## Sheet: ESX1_marinum (S1)
Complete list of genes of which expression is significantly changed in M. marinum eccCb1 transposon mutant vs wild-type strain during growth in 7H9 culture medium. P<0.05
Gene ID	foldChange	log2FoldChange	pval	Product
MMARE11_52760	0.129558	-2.94833	0	6 kDa early secretory antigenic target EsxA(EsaT-6)
MMARE11_52750	0.247521	-2.93595	6.24925e-246	Esat-6 like protein EsxB
MMARE11_52740	0.13968	-2.83981	8.1477e-220	PPE family protein
MMARE11_52730	0.12358	-3.01648	2.95998e-125	PE family protein
MMARE11_37690	0.345941	-1.5314	1.82005e-87	fatty acid synthase Fas
MMARE11_52650	0.269308	-1.89267	6.79683e-87	Esx-1 secretion associated protein EspE
MMARE11_52630	0.100376	-3.31652	1.22627e-80	conserved hypothetical protein, whiB6
MMARE11_52830	0.356977	-1.4861	7.75685e-68	Esx-1 secreted protein, EspB
MMARE11_22690	0.191635	-2.38357	2.03244e-58	hypothetical protein
MMARE11_52810	0.265596	-1.9127	2.77679e-52	Esx-1 secretion associated protein EspK
MMARE11_52790	0.377613	-1.40502	6.95497e-49	Esx-1 secretion associated protein EspJ
MMARE11_52820	0.32843	-1.60634	3.54156e-42	Esx-1 secretion associated protein EspL
MMARE11_33170	0.181458	-2.46229	3.79338e-42	pyruvate dikinase
MMARE11_34190	0.273402	-1.8709	6.13818e-41	hypothetical protein
MMARE11_18560	0.217295	-2.20228	1.18036e-39	secreted L-alanine dehydrogenase Ald (40 kDaantigen)
MMARE11_52670	0.384953	-1.37724	5.1464e-39	Esx-1 secretion associated protein EspG1
MMARE11_52660	0.402723	-1.31214	3.26482e-38	Esx-1 secretion associated protein EspF
MMARE11_52690	0.39447	-1.34201	3.29463e-38	type VII secretion protein EccA1
MMARE11_32390	0.275455	-1.86011	4.53395e-36	3-oxoacyl-[acyl-carrier protein] synthase 1KasA
MMARE11_32400	0.239692	-2.06075	4.70117e-35	3-oxoacyl-[acyl-carrier protein] synthase 2KasB
MMARE11_32380	0.29108	-1.78051	1.38584e-32	meromycolate extension acyl carrier proteinAcpM
MMARE11_02690	0.145014	-2.86631	9.17019e-32	PE-PGRS family protein, PE_PGRS1
MMARE11_46160	0.104602	-3.25702	4.71926e-31	PE-PGRS family protein
MMARE11_31390	0.182124	-2.45701	4.6571e-28	cytochrome C oxidase (subunit III) CtaE
MMARE11_20130	0.196801	-2.34519	9.02702e-27	conserved hypothetical protein
MMARE11_52680	0.428731	-1.22186	8.69266e-25	Esx-1 secretion associated protein EspH
MMARE11_52640	0.473032	-1.0932	3.43721e-22	conserved hypothetical regulatory protein
MMARE11_24740	20.0268	4.32386	1.04654e-21	hypothetical protein
MMARE11_01750	0.432274	-1.20771	7.81132e-21	PPE family protein
MMARE11_42610	0.270436	-1.88664	3.2837e-20	hypothetical membrane protein
MMARE11_46140	0.128611	-2.95892	1.03104e-19	pyruvate dehydrogenase (acetyl-transferring) E1component, alpha subunit
MMARE11_10500	0.370902	-1.43089	1.62599e-19	D-serine/D-alanine/glycine transporter, CycA
MMARE11_35721	0.358862	-1.4785	3.6995e-19	PPE family protein
MMARE11_07440	0.597773	-0.74233	9.87557e-19	mycolic acid synthase UmaA
MMARE11_35620	0.395847	-1.38582	1.79656e-18	EsaT-6 like protein EsxP_2
MMARE11_16810	0.424131	-1.23742	1.65199e-17	polyketide synthase Pks15/1
MMARE11_04610	0.308596	-1.69621	3.3875e-17	acetyl-CoA acyltransferase FadA2
MMARE11_47330	0.494461	-1.03672	1.88205e-16	serine/threonine-protein kinase PknF_2
MMARE11_04600	0.258187	-1.95351	6.13088e-16	3-oxoacyl-[acyl-carrier protein] reductaseFabG4
MMARE11_09460	0.401827	-1.31536	1.24033e-15	DNA-directed RNA polymerase, beta subunit, RpoB
MMARE11_32410	0.509392	-0.973152	1.54759e-15	acetyl/propionyl-CoA carboxylase (beta subunit)AccD6
MMARE11_42690	0.40908	-1.28955	2.25651e-15	EsaT-6 like protein EsxN_1
MMARE11_10960	0.450273	-1.1455	3.48185e-15	inosine-5-monophosphate (imp) dehydrogenase,GuaB2
MMARE11_17460	0.415389	-1.26746	3.9782e-15	30S ribosomal protein S2 RpsB
MMARE11_34010	0.172455	-2.5357	4.36255e-15	pyruvate dehydrogenase E1 component (alphasubunit)
MMARE11_43750	0.382255	-1.38739	6.00009e-15	PE-PGRS family protein, PE_PGRS2
MMARE11_23831	11.7285	3.55195	8.09792e-15	PE-PGRS family protein, PE_PGRS62_2
MMARE11_36110	0.275455	-1.86011	9.62632e-15	acyl-[acyl-carrier protein] desaturase DesA1_1
MMARE11_34020	0.0554399	-4.17293	3.13804e-14	pyruvate dehydrogenase E1 component (betasubunit)
MMARE11_45030	0.30318	-1.72175	4.99057e-14	acyl-CoA thiolase FadA
MMARE11_29160	0.45731	-0.717121	5.42643e-14	conserved membrane protein
MMARE11_35690	0.421863	-1.24515	5.67131e-14	EsaT-6 like protein EsxP_3
MMARE11_29390	11.0312	3.46351	7.80314e-14	conserved hypothetical membrane protein
MMARE11_34320	34.6766	5.11589	4.45758e-13	maltooligosyltrehalose synthase TreX_1
MMARE11_28350	0.362255	-1.46492	7.3786e-13	catalase-peroxidase-peroxynitritase T KatG
MMARE11_45020	0.337425	-1.56736	1.09577e-12	fatty oxidation protein FadB
MMARE11_42680	0.369344	-1.42269	1.20498e-12	EsaT-6 like protein EsxP
MMARE11_10830	2.66189	1.41245	2.31124e-12	10 kDa chaperone (GroES)
MMARE11_39100	0.34858	-1.52044	3.19655e-12	transcription termination factor Rho
MMARE11_46370	0.362255	-1.46492	3.96718e-12	phytoene synthase, CrtB
MMARE11_29720	2.20153	1.24856	3.99073e-12	conserved membrane transport protein, MmpS4_1
MMARE11_04150	0.430695	-1.12841	9.63145e-12	iron-regulated phosphoenolpyruvate carboxykinase[GTP] PckA
MMARE11_16470	0.427923	-1.22458	1.2646e-11	DNA-binding protein Hu, HupB
MMARE11_07490	0.365437	-1.48431	2.02382e-11	iron-regulated heparin binding hemagglutininHbhA
MMARE11_34030	0.0528017	-4.24327	3.24504e-11	pyruvate dehydrogenase (E2 component)
MMARE11_46150	0.159364	-2.6496	1.18874e-10	integral membrane protein
MMARE11_05870	0.273159	-1.87218	1.80866e-10	GrpE protein (Hsp-70 cofactor)
MMARE11_23720	0.328308	-1.60688	2.90619e-10	50S ribosomal protein L35, RpmL
MMARE11_10040	0.386033	-1.3732	3.18417e-10	50S ribosomal protein L5, RplE
MMARE11_31400	0.446526	-1.16318	5.75498e-10	ubiquinol-cytochrome C reductase QcrC
MMARE11_12480	0.440214	-1.18372	6.58844e-10	transcriptional regulatory protein Whib-likeWhiB2
MMARE11_23830	3.43345	1.77966	7.00436e-10	PE-PGRS family protein, PE_PGRS62_1
MMARE11_10050	0.424963	-1.23459	7.30643e-10	30S ribosomal protein S14, RpsN
MMARE11_14300	0.366241	-1.4861	9.78301e-10	two-component sensor histidine kinase DevS
MMARE11_49940	0.419227	-1.25769	1.35602e-09	transcriptional regulatory protein Whib-likeWhiB4
MMARE11_16970	0.388937	-1.36239	1.79665e-09	fatty acyl-AMP ligase FadD26, DIM biosynthesis
MMARE11_35610	0.440907	-1.19029	2.5682e-09	EsaT-6 like protein EsxN_3
MMARE11_20540	0.294631	-1.76302	3.08913e-09	PE-PGRS family protein, PE_PGRS44
MMARE11_05040	0.414572	-1.2703	4.14377e-09	EsaT-6 like protein EsxH
MMARE11_51890	0.564807	-0.824169	5.0747e-09	secreted antigen 85-A FbpA
MMARE11_04590	0.352494	-1.51369	8.09503e-09	conserved membrane protein, htdX
MMARE11_42130	0.400902	-1.31868	8.73817e-09	beta-ketoacyl CoA thiolase FadA3
MMARE11_14230	0.253731	-1.97863	9.06085e-09	acyl-CoA dehydrogenase FadE24
MMARE11_35718	0.401908	-1.31506	9.1692e-09	EsaT-6 like protein EsxP_4
MMARE11_09900	0.413234	-1.27497	1.75252e-08	50S ribosomal protein S19, RpsS
MMARE11_12300	0.371089	-1.43016	1.78064e-08	acyl-CoA dehydrogenase FadE25
MMARE11_23820	0.314849	-1.68194	1.79593e-08	PE-PGRS family protein, PE_PGRS62
MMARE11_23710	0.365611	-1.45162	2.61928e-08	initiation factor IF-3 InfC
MMARE11_51860	0.30318	-1.72175	3.29123e-08	fatty acyl-AMP ligase FadD32
MMARE11_16050	0.418383	-1.25711	3.29582e-08	electron transfer flavoprotein (beta-subunit)FixA
MMARE11_00060	0.375311	-1.41384	3.39664e-08	DNA gyrase (subunit A) GyrA
MMARE11_31000	0.478521	-1.06335	3.98829e-08	penicillin-binding membrane protein PbpB
MMARE11_16870	0.514115	-0.959837	4.00033e-08	multifunctional mycocerosic acid synthasemembrane-associated Mas
MMARE11_19270	0.45519	-1.13546	4.95524e-08	RNA polymerase sigma factor SigB
MMARE11_13670	0.421227	-1.24422	5.21244e-08	PPE family protein
MMARE11_19350	0.415799	-1.26604	7.49594e-08	RNA polymerase sigma factor SigA
MMARE11_12240	0.478658	-1.06293	9.22022e-08	propionyl-CoA carboxylase beta chain 5 AccD5
MMARE11_35710	0.446526	-1.16318	1.11849e-07	PPE family protein
MMARE11_05860	0.309096	-1.69387	1.13428e-07	chaperone protein DnaK
MMARE11_09270	0.39927	-1.32456	1.87346e-07	methoxy mycolic acid synthase 3, MmaA3
MMARE11_34120	0.345941	-1.5314	1.91878e-07	ferredoxin
MMARE11_42570	0.437728	-1.19189	1.96555e-07	cytochrome P450 138B1 Cyp138B1
MMARE11_22700	0.473797	-1.07766	2.03217e-07	conserved hypothetical protein
MMARE11_51380	3.73029	1.89929	2.05625e-07	conserved hypothetical protein
MMARE11_47280	0.510674	-0.969526	2.18119e-07	conserved protein
MMARE11_18460	2.56282	1.35773	2.20051e-07	lipid-transfer protein Ltp1
MMARE11_23730	0.436811	-1.19492	2.3603e-07	50S ribosomal protein L20 RplT
MMARE11_43410	0.648744	-0.624279	2.59606e-07	serine protease PepD
MMARE11_12700	0.600919	-0.734758	2.6181e-07	conserved protein
MMARE11_35630	0.739588	-0.435206	3.11044e-07	conserved hypothetical protein
MMARE11_31670	0.658909	-0.601848	4.19529e-07	conserved hypothetical MbtH-like protein
MMARE11_34110	0.319115	-1.64785	5.32862e-07	flavodoxin oxidoreductase
MMARE11_09760	1.83201	0.873428	5.85118e-07	Creatinine amidohydrolase
MMARE11_34130	0.366835	-1.4468	8.85192e-07	conserved hypothetical membrane protein
MMARE11_47920	0.712526	-0.488986	1.12212e-06	MCE-family protein Mce4F
MMARE11_34200	0.576266	-0.795193	1.23077e-06	Geranylgeranyl pyrophosphate synthase
MMARE11_33990	1.41712	0.502962	1.32833e-06	conserved hypothetical protein
MMARE11_49030	0.588174	-0.765685	1.36102e-06	carbonic anhydrase
MMARE11_15910	0.577915	-0.791071	1.42823e-06	conserved membrane protein
MMARE11_26860	0.341528	-1.54993	1.52438e-06	conserved hypothetical amidase
MMARE11_49880	1.27502	0.350526	1.58607e-06	conserved regulatory protein
MMARE11_14340	0.601356	-0.733708	1.59971e-06	conserved protein
MMARE11_06590	1.76066	0.816118	1.77433e-06	phosphate acetyltransferase Pta
MMARE11_41570	0.6927	-0.529698	1.82779e-06	6-phosphogluconate dehydrogenase,decarboxylating Gnd2
MMARE11_21760	0.634543	-0.65621	1.83984e-06	transketolase Tkt
MMARE11_41070	0.413234	-1.27497	2.16444e-06	conserved hypothetical secreted protein
MMARE11_34100	0.315085	-1.66619	2.26505e-06	coenzyme F420-reducing hydrogenase, gammasubunit
MMARE11_31010	0.66677	-0.584738	2.37783e-06	conserved proline rich membrane protein
MMARE11_10060	0.723842	-0.466253	2.73522e-06	30S ribosomal protein S8, RpsH
MMARE11_51850	0.787921	-0.343878	3.29092e-06	polyketide synthase Pks13
MMARE11_09660	0.833547	-0.262665	3.50946e-06	iron-regulated elongation factor Ef-tu, Tuf
MMARE11_34890	0.556199	-0.846327	3.72838e-06	PE-PGRS family protein
MMARE11_23150	0.6482	-0.625489	3.97848e-06	l-aspartate oxidase NadB
MMARE11_09770	1.64148	0.714994	4.65808e-06	membrane glycosyl transferase
MMARE11_46530	1.16853	0.224694	4.75148e-06	cold shock protein a, CspA
MMARE11_49020	0.659957	-0.599556	4.75713e-06	conserved membrane protein
MMARE11_51370	3.60442	1.84977	4.82841e-06	conserved membrane protein
MMARE11_51880	0.747536	-0.419785	5.07457e-06	secreted Mpt51/Mpb51 antigen protein FbpD
MMARE11_04580	0.597773	-0.74233	5.69904e-06	conserved transmembrane protein
MMARE11_24440	0.480096	-1.05861	5.70305e-06	PPE family protein
MMARE11_06070	0.645385	-0.631767	5.90063e-06	carbon monoxyde dehydrogenase (large chain),CoxL
MMARE11_33950	0.564833	-0.824103	6.28021e-06	conserved hypothetical protein
MMARE11_04850	0.758266	-0.399223	6.71136e-06	fatty-acid-CoA ligase FadD2
MMARE11_21270	0.71635	-0.481263	6.7312e-06	s-adenosylmethionine synthetase MetK
MMARE11_07930	0.635076	-0.654998	7.2682e-06	porphobilinogen deaminase HemC
MMARE11_33160	0.205312	-2.28411	7.62567e-06	dihydroorotate dehydrogenase
MMARE11_07790	1.42768	0.513675	7.74963e-06	conserved protein
MMARE11_42560	0.478658	-1.06293	7.87364e-06	conserved transmembrane transport protein, MmpL
MMARE11_27900	1.7983	0.846633	8.72069e-06	conserved hypothetical membrane protein
MMARE11_52710	1.78305	0.834346	9.56748e-06	type VII secretion EccCa1
MMARE11_39000	0.829593	-0.269525	9.67461e-06	ATP synthase delta chain AtpH
MMARE11_43400	0.649038	-0.623626	1.18101e-05	pterin-4-alpha-carbinolamine dehydratase MoaB2
MMARE11_05950	0.691188	-0.532849	1.19147e-05	endopeptidase ATP binding protein (chain B)ClpB
MMARE11_00710	0.71373	-0.48655	1.27072e-05	30S ribosomal protein S6 RpsF
MMARE11_16310	0.713463	-0.487089	1.2899e-05	ketol-acid reductoisomerase IlvC
MMARE11_46400	0.82538	-0.27687	1.34534e-05	conserved transmembrane transport proteinMmpL13_1
MMARE11_20880	0.616324	-0.698238	1.71963e-05	proline and glycine rich transmembrane protein
MMARE11_21420	0.61687	-0.696961	1.74856e-05	conserved lipoprotein LprG
MMARE11_16920	0.542285	-0.882877	1.88997e-05	phenolpthiocerol synthesis type-I polyketidesynthase PpsE
MMARE11_31350	0.763998	-0.388358	1.98832e-05	conserved hypothetical secreted protein
MMARE11_52720	2.34099	1.22712	2.08545e-05	type VII secretion EccCb1
MMARE11_49870	1.51793	0.602108	2.16031e-05	conserved hypothetical membrane protein
MMARE11_35670	0.442517	-1.17777	2.21716e-05	EsaT-6 like protein EsxN_4
MMARE11_30740	1.578	0.658097	2.22732e-05	conserved protein MbtH
MMARE11_05700	0.760307	-0.395346	2.38393e-05	aspartate aminotransferase AspC
MMARE11_05690	0.760257	-0.395441	2.41273e-05	iron-sulphur-binding reductase
MMARE11_26820	0.542285	-0.882877	2.54353e-05	bacterioferritin BfrA
MMARE11_22770	0.723452	-0.467031	2.70213e-05	conserved polyketide synthase associated proteinPapA3
MMARE11_52260	0.644139	-0.634556	2.75667e-05	monooxygenase EthA
MMARE11_25100	0.697062	-0.520642	2.79112e-05	PPE family protein, PPE8
MMARE11_16060	0.76334	-0.389602	2.79461e-05	electron transfer flavoprotein (alpha-subunit)FixB
MMARE11_28140	0.667332	-0.583524	2.91786e-05	PE family protein
MMARE11_16770	0.673561	-0.57012	3.1334e-05	ketoreductase
MMARE11_00050	0.42493	-1.2347	3.19188e-05	DNA gyrase (subunit B) GyrB
MMARE11_10460	0.648921	-0.623885	3.2339e-05	30S ribosomal protein S4, RpsD
MMARE11_09210	0.793478	-0.333738	3.26565e-05	transcription antitermination protein, NusG
MMARE11_36790	0.687075	-0.54146	3.37796e-05	valyl-tRNA synthetase protein ValS
MMARE11_43740	0.517649	-0.949955	3.54875e-05	PE-PGRS family protein
MMARE11_04460	2.01426	1.01025	3.69828e-05	transcriptional regulatory protein (probablyTetR/AcrR-family)
MMARE11_33860	0.349346	-1.51727	3.87448e-05	ketoacyl-acyl carrier protein synthase III
MMARE11_01740	0.733688	-0.446761	3.9917e-05	PE family protein, PE35
MMARE11_05240	0.567225	-0.818008	4.08519e-05	beta-1,3-glucanase precursor
MMARE11_35714	0.66861	-0.580763	4.12156e-05	EsaT-6 like protein EsxN_5
MMARE11_49720	0.40908	-1.28955	4.16448e-05	phosphoserine phosphatase SerB
MMARE11_12120	2.81082	1.49099	4.16955e-05	conserved hypothetical membrane protein
MMARE11_17470	0.772478	-0.372434	4.19788e-05	elongation factor Tsf
MMARE11_10870	0.657034	-0.60596	4.28653e-05	PPE family protein
MMARE11_00720	0.657185	-0.605628	4.63354e-05	single-strand binding protein Ssb
MMARE11_33850	0.212404	-2.23512	4.892e-05	ketoacyl-acyl carrier protein synthase III
MMARE11_29170	0.735207	-0.443777	5.03678e-05	ferredoxin FdxA_2
MMARE11_01390	1.6069	0.684279	5.66357e-05	conserved protein
MMARE11_36100	0.492799	-1.02093	5.89879e-05	conserved hypothetical transcriptionalregulator
MMARE11_17370	10.659	3.414	6.00994e-05	UDP-glucose 4-epimerase, GalE4
MMARE11_39210	0.285205	-1.80993	6.01404e-05	pyridoxamine 5-phosphate oxidase
MMARE11_23980	2.29441	1.19813	6.59904e-05	cytochrome P450 139A3 Cyp139A3
MMARE11_16490	0.720706	-0.472518	7.04367e-05	polyphosphate kinase Ppk
MMARE11_43620	0.791287	-0.337728	7.17901e-05	succinyl-CoA synthetase (alpha chain) SucD
MMARE11_09860	0.804838	-0.31323	7.21394e-05	50S ribosomal protein L3 RplC
MMARE11_15990	1.67575	0.744809	7.25335e-05	conserved hypothetical membrane protein
MMARE11_16930	0.509392	-0.973152	7.5896e-05	phenolpthiocerol synthesis type-I polyketidesynthase PpsD
MMARE11_33150	0.258549	-1.95149	8.66108e-05	pyruvate ferredoxin/flavodoxin oxidoreductasefamily protein
MMARE11_09890	0.759045	-0.397742	9.40919e-05	50S ribosomal protein L2, RplB
MMARE11_26340	0.764151	-0.38807	9.56462e-05	malate synthase G GlcB
MMARE11_03800	0.793323	-0.334019	0.000109827	MCE-family protein Mce1F
MMARE11_05210	2.37724	1.24928	0.000113682	conserved hypothetical protein
MMARE11_29120	2.51619	1.33124	0.000145929	conserved protein
MMARE11_51340	0.818802	-0.288414	0.000146844	19 kDa lipoprotein antigen precursor LpqH
MMARE11_01450	0.766838	-0.383006	0.000149625	isocitrate dehydrogenase [NADP] Icd2
MMARE11_22550	1.39066	0.475775	0.000156175	glycosyltransferase, WcaA
MMARE11_12370	0.679679	-0.557074	0.00015699	metal cation-transporting p-type ATPase C CtpC
MMARE11_06560	0.656808	-0.606456	0.000158145	polyketide synthase Pks6
MMARE11_36220	1.89135	0.91942	0.000162899	sulfate-transport ATP-binding protein ABCtransporter CysA1
MMARE11_14220	0.659565	-0.600413	0.000175103	acyl-CoA dehydrogenase FadE23
MMARE11_23160	0.59536	-0.748166	0.000176555	nicotinate-nucleotide pyrophosphatase NadC
MMARE11_38840	0.753327	-0.408653	0.000184026	acetyl-CoA acetyltransferase FadA4
MMARE11_23560	0.850633	-0.233391	0.000185095	ribosomal protein S1 RpsA
MMARE11_18150	0.795815	-0.329495	0.000194507	integral membrane efflux protein EfpA
MMARE11_27241	0.566961	-0.818678	0.00021206	conserved membrane protein
MMARE11_09470	0.875622	-0.191619	0.00021319	DNA-directed RNA polymerase, beta chain, RpoC
MMARE11_31040	2.64377	1.40259	0.000218735	conserved hypothetical membrane protein
MMARE11_29690	1.57682	0.65702	0.000234619	bifunctional protein: CobI-CobJ fusion protein
MMARE11_43640	0.617867	-0.694632	0.00023637	conserved hypothetical protein
MMARE11_31660	0.672595	-0.572191	0.000245212	conserved transmembrane transport protein-MmpLfamily
MMARE11_23970	1.42648	0.512458	0.000252189	chalcone synthase, Pks11_1
MMARE11_08280	2.56392	1.35835	0.000255805	conserved hypothetical membrane protein
MMARE11_21740	0.723517	-0.4669	0.000257506	glucose-6-phosphate 1-dehydrogenase Zwf2
MMARE11_36980	2.0656	1.04656	0.000258684	conserved hypothetical protein
MMARE11_33940	0.218815	-2.19221	0.000259615	phosphofructokinase, PfkB_1
MMARE11_05030	0.746018	-0.422718	0.00026398	EsaT-6 like protein EsxG
MMARE11_39040	0.760747	-0.39451	0.000279557	conserved hypothetical membrane protein
MMARE11_48620	0.594984	-0.749076	0.000308048	PPE family protein
MMARE11_05610	6.87031	2.78037	0.000313263	conserved hypothetical membrane protein
MMARE11_00730	0.680975	-0.554327	0.000314604	30S ribosomal protein S18-1 RpsR1
MMARE11_34060	2.17826	1.12318	0.000317613	PE-PGRS family protein
MMARE11_07920	0.735176	-0.443839	0.000317772	glutamyl-tRNA reductase HemA
MMARE11_21950	0.735401	-0.443397	0.000319515	acyl-CoA dehydrogenase FadE15
MMARE11_07940	0.755117	-0.405228	0.000328592	uroporphyrin-III C-methyltransferase HemD
MMARE11_06600	1.55459	0.63653	0.000328816	acetate kinase AckA
MMARE11_24450	0.550341	-0.861602	0.000342989	PPE family protein, PPE23
MMARE11_00570	1.46574	0.551631	0.000343948	short-chain type oxidoreductase
MMARE11_26510	1.28155	0.357892	0.000345724	oxidoreductase
MMARE11_29710	0.714882	-0.484222	0.000352751	conserved transmembrane transport protein,MmpL5_5
MMARE11_41460	6.20321	2.63302	0.000355158	5-methyltetrahydropteroyltriglutamate--homocysteine methyltransferase MetE
MMARE11_17500	8.00972	3.00175	0.000363161	conserved hypothetical membrane protein
MMARE11_31721	0.799448	-0.322923	0.000373517	non-ribosomal peptide synthetase
MMARE11_12710	0.409806	-1.28699	0.000381718	preprotein translocase SecA1 1 subunit
MMARE11_52770	0.516024	-0.954489	0.000395021	Esx-1 secretion associated protein EspI
MMARE11_10480	0.765424	-0.385669	0.000489109	50S ribosomal protein L17, RplQ
MMARE11_36900	0.768909	-0.379114	0.000490983	ATP-dependent CLP protease proteolytic subunit 2ClpP2
MMARE11_43730	0.495857	-1.01201	0.000516575	PE-PGRS family protein
MMARE11_53130	0.688689	-0.538076	0.00051876	conserved protein
MMARE11_40280	0.779055	-0.360202	0.000520288	alternative RNA polymerase sigma factor SigE
MMARE11_35940	3.41501	1.77189	0.000521494	alternative RNA polymerase sigma factorSigJ-like protein
MMARE11_00580	1.83831	0.878378	0.000524364	transcriptional regulatory protein
MMARE11_24980	0.25954	-1.94597	0.000570934	amino acid transporter PotE
MMARE11_49350	0.803582	-0.315483	0.000576907	membrane-bound protease FtsH
MMARE11_29480	0.853007	-0.229371	0.000579539	polyketide synthase, Pks12
MMARE11_30840	1.37295	0.457282	0.000582477	conserved hypothetical membrane protein
MMARE11_26750	1.23554	0.305143	0.000584637	alkyl hydroperoxide reductase D protein AhpD
MMARE11_11450	0.773331	-0.370842	0.000599197	O-acetylhomoserine sulfhydrylase MetC
MMARE11_40950	2.00855	1.00615	0.000600992	PE family protein
MMARE11_43630	0.830971	-0.26713	0.00066797	succinyl-CoA synthetase (beta chain) SucC
MMARE11_07300	0.639052	-0.645996	0.0006708	aldehyde dehydrogenase, PutA_1
MMARE11_09180	0.783784	-0.351472	0.00068974	conserved protein
MMARE11_30230	1.44956	0.535612	0.00069473	dihydrolipoamide dehydrogenase Lpd_1
MMARE11_22280	2.34392	1.22893	0.000704823	conserved hypothetical protein
MMARE11_50020	3.69808	1.88678	0.00070516	conserved hypothetical response regulatoryprotein
MMARE11_12610	0.802828	-0.316838	0.000713178	adenosylhomocysteinase SahH
MMARE11_06530	0.504106	-0.988201	0.000724175	conserved transmembrane transport protein MmpL1
MMARE11_14450	0.651059	-0.619141	0.000729821	ssRNA-binding protein SmpB
MMARE11_36760	1.32053	0.401113	0.000737513	nucleoside diphosphate kinase NdkA
MMARE11_26410	1.40576	0.491354	0.000766898	transcriptional regulatory protein
MMARE11_52310	0.748653	-0.41763	0.000809146	conserved hypothetical secreted protein
MMARE11_31980	0.45274	-1.14325	0.000817341	cytochrome C oxidase polypeptide I CtaD_1
MMARE11_18750	4.10028	2.03572	0.00083832	PE-PGRS family protein
MMARE11_52240	0.666424	-0.585489	0.000843479	histone-like protein Hns
MMARE11_51400	0.520896	-0.940932	0.000877984	PE-PGRS family protein
MMARE11_21970	1.23199	0.300988	0.000888904	cation transporter p-type ATPase D CtpD
MMARE11_20020	2.19002	1.13095	0.000901298	conserved hypothetical protein
MMARE11_07350	0.798924	-0.32387	0.000920848	dihydrolipoamide dehydrogenase Lpd
MMARE11_03790	0.834644	-0.260767	0.000945967	MCE-family lipoprotein LprK (MCE-familylipoprotein Mce1E)
MMARE11_29150	0.518146	-0.948569	0.000948488	GTP cyclohydrolase I FolE_1
MMARE11_18110	1.5307	0.614188	0.000949786	magnesium chelatase
MMARE11_25970	0.811417	-0.301485	0.000961483	type VII secretion EccD5
MMARE11_41800	3.4496	1.78643	0.00100666	conserved hypothetical protein
MMARE11_09350	2.69805	1.43191	0.00102345	malonyl CoA-acyl carrier protein transacylase,FabD2
MMARE11_16290	0.669629	-0.578566	0.00102559	acetolactate synthase (large subunit) IlvB1
MMARE11_31800	1.28451	0.361214	0.00104953	multimeric flavodoxin WrbA
MMARE11_29890	0.698453	-0.517764	0.00108044	conserved hypothetical protein
MMARE11_01760	0.82856	-0.271322	0.00110545	10 kDa culture filtrate antigen EsxB_1
MMARE11_44300	2.20447	1.14043	0.00111959	conserved hypothetical protein
MMARE11_27920	2.63104	1.39564	0.00118149	multidrug-transport integral membrane proteinMmr-like protein
MMARE11_25700	0.798064	-0.325424	0.00118353	conserved hypothetical protein
MMARE11_44470	1.67122	0.740899	0.00118974	conserved hypothetical penicillin bindingprotein
MMARE11_02220	2.78018	1.47518	0.00119311	transcriptional regulatory protein (possiblyTetR-family)
MMARE11_07480	0.616269	-0.698368	0.00120753	transcriptional regulatory protein
MMARE11_21410	0.814698	-0.295662	0.00123268	aminoglycosides/tetracycline-transport integralmembrane protein
MMARE11_20560	2.24066	1.16392	0.00127023	hypothetical secreted protein
MMARE11_10840	0.845316	-0.242437	0.00127502	60 kDa chaperone (GroEL1)
MMARE11_36960	0.585079	-0.773297	0.00128372	ribose/galactose isomerase RpiB
MMARE11_03720	0.818628	-0.288721	0.00129887	fatty-acid-CoA ligase FadD5
MMARE11_23450	2.16547	1.11468	0.00135238	conserved hypothetical membrane protein
MMARE11_15680	0.686457	-0.542759	0.00136788	ribonucleoside-diphosphate reductase (betachain) NrdF2
MMARE11_41790	1.5218	0.605782	0.0013872	cholesterol dehydrogenase
MMARE11_37020	0.762272	-0.391622	0.00140861	conserved hypothetical protein
MMARE11_17990	1.66444	0.735037	0.00143039	nickel cation-binding GTPase, HypB
MMARE11_27590	0.580894	-0.783654	0.00146419	immunogenic protein Mpt63
MMARE11_22620	0.868845	-0.202829	0.00152561	probable polyketide synthase Pks5
MMARE11_29500	0.788609	-0.342618	0.00153276	conserved hypothetical protein
MMARE11p_00200	1.45131	0.537359	0.00156893	putative ATPase
MMARE11_03770	0.862619	-0.213204	0.00161686	MCE-family protein Mce1C
MMARE11_23860	0.616095	-0.698776	0.00165583	glutamate N-acetyltransferase ArgJ
MMARE11_24790	4.37052	2.12781	0.00167391	ANTAR domain protein
MMARE11_09990	1.83447	0.875361	0.00180757	conserved protein
MMARE11_07250	0.720294	-0.473341	0.00181365	conserved transmembrane transport protein-MmpLfamily
MMARE11_36850	0.816396	-0.292659	0.00181788	pyruvate:ferredoxin oxidoreductase PorB, betasubunit
MMARE11_00070	0.6928	-0.52949	0.00184647	conserved hypothetical membrane protein
MMARE11_06960	1.62663	0.701885	0.00188483	tuberculin related peptide
MMARE11_13500	1.44813	0.534188	0.00190939	hypothetical protein
MMARE11_49220	0.881727	-0.181596	0.00200771	ATP-dependent protease ATP-binding subunitClpC1
MMARE11_41440	1.83654	0.876987	0.00203469	short-chain type dehydrogenase/reductase
MMARE11_39080	0.672212	-0.573013	0.00204736	peptide chain release factor 1 PrfA
MMARE11_28230	0.202764	-2.30213	0.00204802	beta-1,3-glucanase precursor
MMARE11_23550	0.750753	-0.41359	0.00206512	DNA polymerase I PolA
MMARE11_16940	0.734093	-0.445965	0.00207916	phenolpthiocerol synthesis type-I polyketidesynthase PpsC
MMARE11_25520	2.87565	1.52389	0.00212283	cytochrome P450 143A3 Cyp143A3
MMARE11_39420	1.66616	0.736527	0.00218115	bifunctional enzyme CysN/CysC: sulfateadenyltransferase (subunit 1) + adenylylsulfate kinase
MMARE11_05050	0.813879	-0.297114	0.00239564	type VII secretion EspG3
MMARE11_46360	0.858698	-0.219778	0.0024356	phytoene dehydrogenase CrtI
MMARE11_11400	1.95119	0.964355	0.00243705	Fatty acyl-AMP ligase FadD28_1 and polyketidesynthase
MMARE11_22930	1.46329	0.549219	0.0025142	acyltransferase, PlsB1
MMARE11_40660	1.45991	0.545883	0.00251452	pyrroline-5-carboxylate dehydrogenase, RocA
MMARE11_34090	0.607375	-0.71934	0.00255894	coenzyme F420-reducing hydrogenase, alphasubunit
MMARE11_09930	0.738132	-0.438049	0.00260962	50S ribosomal protein L16, RplP
MMARE11_51830	0.236168	-2.08211	0.00263069	PE-PGRS family protein
MMARE11_10650	0.827908	-0.272457	0.00263904	ribosomal protein S9, RpsI
MMARE11_49910	1.39457	0.479824	0.00268883	conserved hypothetical protein
MMARE11_21170	0.647376	-0.627324	0.00270859	aspartate carbamoyltransferase PyrB
MMARE11_40550	1.66882	0.738831	0.00272769	transcriptional regulatory protein
MMARE11_19450	1.62005	0.696036	0.00281389	conserved integral membrane alanine and leucinerich protein
MMARE11_08630	0.821148	-0.284287	0.0028778	transmembrane carbonic anhydrase, SulP
MMARE11_14800	3.57011	1.83597	0.00289131	conserved hypothetical membrane protein
MMARE11_06730	0.873869	-0.194511	0.0029517	conserved hypothetical membrane protein
MMARE11_00410	0.350025	-1.51447	0.0030423	transcriptional regulatory protein
MMARE11_29310	0.500268	-0.999228	0.00304931	PE-PGRS family protein
MMARE11_22530	1.50708	0.591752	0.00311003	conserved putative aldolase
MMARE11_49230	1.6279	0.703015	0.00314461	iron-regulated Lsr2 protein precursor
MMARE11_32320	1.33802	0.420099	0.00318183	peroxiredoxin AhpE
MMARE11_32370	0.655728	-0.60883	0.00323538	malonyl CoA-acyl carrier protein transacylaseFabD
MMARE11_23900	1.44992	0.53597	0.00325926	arginine repressor ArgR
MMARE11_42930	0.70146	-0.511567	0.00331029	resuscitation-promoting factor RpfB
MMARE11_21100	0.731165	-0.451732	0.00333712	conserved lipoprotein LprF
MMARE11_13810	0.719144	-0.475647	0.00335186	NADH dehydrogenase I (chain C) NuoC(NADH-ubiquinone oxidoreductase chain C)
MMARE11_13130	0.679809	-0.556798	0.00339798	ATP-dependent RNA helicase RhlE
MMARE11_10270	0.765218	-0.386057	0.00341706	preprotein translocase, SecY
MMARE11_36740	1.23312	0.302318	0.00352675	50S ribosomal protein L21 RplU
MMARE11_02380	1.27929	0.355345	0.00353504	conserved transmembrane transport protein,MmpL5_4
MMARE11_00960	0.696762	-0.521261	0.00355926	cellobiohydrolase a (1,4-beta-cellobiosidase a)CelA
MMARE11_52800	0.711172	-0.49173	0.0035681	conserved hypothetical protein EspE-like
MMARE11_16910	0.703088	-0.508223	0.00357906	daunorubicin-DIM-transport ATP-binding proteinABC transporter DrrA
MMARE11_31810	1.35465	0.437922	0.00365971	conserved hypothetical protein
MMARE11_21380	0.601992	-0.732184	0.00367844	Fmu protein
MMARE11_02140	1.68894	0.756121	0.00368588	dioxygenase
MMARE11_35950	1.67788	0.746642	0.00373644	low molecular weight antigen Cfp2
MMARE11_21750	0.782992	-0.35293	0.00376503	transaldolase Tal
MMARE11_16010	2.38845	1.25607	0.00379917	dehydrogenase/reductase
MMARE11_44890	6.24637	2.64302	0.00384886	molybdenum cofactor biosynthesis protein D 2MoaD2
MMARE11_04450	0.792425	-0.335653	0.00385057	acyl-CoA dehydrogenase FadE4
MMARE11_10760	0.551748	-0.857918	0.00386526	glutamate decarboxylase, GadB
MMARE11_18310	2.17857	1.12338	0.00386592	enoyl-CoA hydratase, EchA16_2
MMARE11_16380	1.47752	0.563177	0.00386975	glutamyl-tRNA synthetase GltS
MMARE11_47690	2.14295	1.0996	0.00387481	conserved hypothetical protein
MMARE11_13000	0.735379	-0.44344	0.00389431	iron-regulated short-chaindehydrogenase/reductase
MMARE11_15000	2.19857	1.13656	0.00403116	conserved hypothetical protein
MMARE11_31741	0.65088	-0.619536	0.00405988	fatty acyl-AMP ligase
MMARE11_41080	0.72557	-0.462813	0.00408509	conserved hypothetical secreted protein
MMARE11_06110	0.582761	-0.779024	0.00408574	membrane oxidoreductase
MMARE11_43140	1.28757	0.364653	0.00410263	conserved hypothetical protein
MMARE11_49950	0.773066	-0.371336	0.00422783	bifunctional membrane-associatedpenicillin-binding protein 1A/1B PonA2
MMARE11_37180	0.792502	-0.335513	0.00435821	bifunctional transmembrane phospholipidbiosynthesis enzyme PlsC
MMARE11_26610	0.689785	-0.535781	0.00436401	conserved hypothetical membrane protein
MMARE11_02770	5.96733	2.57709	0.00439273	dioxygenase
MMARE11_08120	0.353013	-1.50221	0.00441028	glycine-sarcosine methyltransferase
MMARE11_40960	1.69535	0.761584	0.00443139	conserved hypothetical membrane protein
MMARE11_39010	0.72218	-0.46957	0.0044527	ATP synthase B chain AtpF
MMARE11_37980	0.589778	-0.761756	0.00448592	regulator of sigma subunit, anti-anti-sigmafactor RsbU
MMARE11_03200	2.0324	1.02318	0.00454456	conserved protein
MMARE11_12660	1.19929	0.262178	0.00456951	two-component sensory transduction histidinekinase MtrB
MMARE11_10970	0.723587	-0.466762	0.00458465	inosine-5-monophosphate (imp) dehydrogenase,GuaB3
MMARE11_48830	0.481572	-1.05418	0.00461158	acyl-CoA dehydrogenase FadE34
MMARE11_42140	0.833743	-0.262325	0.00468824	conserved hypothetical transmembrane protein
MMARE11_11570	2.29498	1.19848	0.00481402	alternative RNA polymerase sigma factor SigJ
MMARE11_31600	0.749923	-0.415186	0.00481715	leucyl aminopeptidase PepB
MMARE11_37640	0.680153	-0.556069	0.00482442	acetylornithine deacetylase ArgE
MMARE11_05850	0.708326	-0.497515	0.00485706	L-asparagine permease AnsP1_1
MMARE11_07580	0.711767	-0.490522	0.00496388	conserved lipoprotein LprQ
MMARE11_52150	0.785059	-0.349126	0.00499446	glycerophosphoryl diester phosphodiesteraseGlpQ1
MMARE11_19080	2.53953	1.34456	0.00501944	conserved hypothetical membrane protein
MMARE11_12050	2.66548	1.4144	0.0050235	endonuclease VIII Nei
MMARE11_49170	0.667509	-0.583141	0.00504446	multifunctional geranylgeranyl pyrophosphatesynthetase IdsA1
MMARE11_52360	1.24452	0.315584	0.00509183	NADH-dependent glutamate synthase (smallsubunit) GltD
MMARE11_25040	0.677151	-0.56245	0.00515953	transcriptional accessory protein Tex
MMARE11_40630	2.1782	1.12314	0.00527145	keto acyl-CoA thiolase, Ltp2
MMARE11_40580	0.685073	-0.54567	0.00528071	conserved hypothetical protein
MMARE11_26060	0.490074	-1.02893	0.00529488	conserved hypothetical membrane protein
MMARE11_34040	0.446677	-1.1627	0.00534578	conserved hypothetical protein
MMARE11_09690	0.731372	-0.451322	0.00538655	ferredoxin reductase
MMARE11_49850	1.82575	0.868487	0.00538669	membrane-anchored thioredoxin-like protein
MMARE11_05520	1.29798	0.376265	0.00539574	haloacid dehalogenase-like hydrolase
MMARE11_49490	0.78124	-0.356162	0.00541098	D-alanyl-D-alanine carboxypeptidase DacB1
MMARE11_36700	0.42931	-1.21991	0.00551705	PE-PGRS family protein
MMARE11_00020	0.782979	-0.352954	0.00554402	DNA polymerase III (beta chain) DnaN
MMARE11_32900	1.35506	0.438354	0.00556667	conserved hypothetical carboxylase
MMARE11_52180	0.554517	-0.850696	0.00575589	superoxide dismutase [fe] SodA
MMARE11_36240	2.13129	1.09173	0.00586293	sulfate-transport integral membrane protein ABCtransporter CysT
MMARE11_51200	1.77605	0.828676	0.00588268	conserved hypothetical membrane protein
MMARE11_24200	0.321666	-1.63637	0.00589853	PE-PGRS family protein, PE_PGRS15_2
MMARE11_22540	1.26605	0.340333	0.00594987	acetolactate synthase (large subunit) IlvB1_3
MMARE11_27830	7.32694	2.87321	0.00598908	enoyl-CoA hydratase EchA13
MMARE11_23170	0.539134	-0.891283	0.0060453	conserved hypothetical protein
MMARE11_17510	3.13925	1.65042	0.0060842	conserved hypothetical membrane protein
MMARE11_09420	1.78889	0.839061	0.00612598	50S ribosomal protein L7/L12, RplL
MMARE11_16840	0.552957	-0.85476	0.0061934	fatty acyl-AMP ligase FadD28
MMARE11_39090	0.77162	-0.374037	0.0061947	50S ribosomal protein L31 RpmE
MMARE11_47210	2.17911	1.12374	0.00621972	Zn-dependent alcohol dehydrogenase, AdhX
MMARE11_10070	0.845874	-0.241485	0.00622054	50S ribosomal protein L6, RplF
MMARE11_50400	1.49201	0.577257	0.00643141	catalase KatE
MMARE11_09650	0.868427	-0.203524	0.00650254	elongation factor G, FusA1
MMARE11_37130	0.840561	-0.250575	0.00658914	ATP-binding component of an ABC transporter
MMARE11_28420	2.45614	1.29639	0.00666385	conserved hypothetical protein
MMARE11_17300	1.61361	0.690292	0.00668773	conserved alanine rich lipoprotein LppW
MMARE11_17980	1.65784	0.729304	0.0067043	nickel/iron-hydrogenase I small subunit, HyaA
MMARE11_09560	0.554133	-0.851695	0.00672912	enoyl-CoA hydratase, EchA5
MMARE11_27060	1.33921	0.421382	0.0068413	conserved secreted protein
MMARE11_26580	0.618622	-0.69287	0.00691396	alanine and proline rich secreted protein Apa
MMARE11_31320	0.774385	-0.368878	0.00700652	long-chain-fatty-acid-CoA ligase FadD15
MMARE11_49620	0.860419	-0.216888	0.00702216	cold shock protein A CspA_1
MMARE11_00610	0.344984	-1.5354	0.00713849	transcriptional regulatory protein (probablyGntR-family)
MMARE11_48700	0.566973	-0.818648	0.00717373	arylamine N-acetyltransferase Nat
MMARE11_11820	0.776964	-0.36408	0.00724085	conserved protein
MMARE11_19320	1.59873	0.676926	0.00724779	conserved hypothetical protein
MMARE11_17150	0.76979	-0.377463	0.00730432	nitrogen regulatory protein P-II GlnB
MMARE11_21320	1.67536	0.744469	0.0073473	membrane protein
MMARE11_01910	2.80123	1.48606	0.00740633	serine hydroxymethyltransferase GlyA2
MMARE11_33180	0.649841	-0.621841	0.00741806	6-phosphofructokinase PfkA_1
MMARE11_08880	0.606007	-0.722593	0.00743631	cytochrome P450 135B4 Cyp135B4
MMARE11_15890	0.625003	-0.678065	0.00749588	transferase
MMARE11_16990	0.666363	-0.585621	0.00753577	thioesterase TesA
MMARE11_26000	1.18821	0.248791	0.00754532	type VII secretion EccA5
MMARE11_20100	0.594505	-0.75024	0.0075483	PE-PGRS family protein
MMARE11_15870	2.22253	1.1522	0.00765009	hypothetical membrane protein
MMARE11_28500	1.46598	0.551863	0.00765818	conserved hypothetical secreted protein
MMARE11_50720	2.14044	1.09791	0.00770591	cutinase, Cut5
MMARE11_10640	0.85883	-0.219556	0.00779229	50S ribosomal protein L13, RplM
MMARE11_09870	0.808905	-0.305957	0.00804941	50S ribosomal protein L4, RplD
MMARE11_31410	0.791253	-0.337789	0.00805774	Rieske iron-sulfur protein QcrA
MMARE11_06410	0.426768	-1.22848	0.00809848	gamma-butyrobetaine hydroxylase, TauD_1
MMARE11_21200	0.696078	-0.52268	0.00814715	carbamoyl-phosphate synthase small chain CarA
MMARE11_05670	0.670121	-0.577507	0.00816557	PE-PGRS family protein
MMARE11_00750	1.2313	0.300187	0.00836988	replicative DNA helicase DnaB
MMARE11_49750	1.83083	0.872498	0.00837069	dipeptide-transport ATP-binding protein ABCtransporter DppD
MMARE11_40940	1.29023	0.367626	0.00842288	F420 biosynthesis protein FbiC
MMARE11_07900	0.771945	-0.373431	0.00864712	conserved transmembrane transport protein,MmpL2
MMARE11_10450	0.75051	-0.414056	0.00865104	30S ribosomal protein S11, RpsK
MMARE11_50300	0.597785	-0.742303	0.00879288	PE-PGRS family protein, PE_PGRS9_2
MMARE11_10470	0.768822	-0.379278	0.00881429	DNA-directed RNA polymerase (alpha chain), RpoA
MMARE11_36810	1.71434	0.777651	0.00892599	conserved hypothetical membrane protein
MMARE11_44690	1.87779	0.909035	0.00907836	conserved hypothetical exported protein
MMARE11_08580	0.470941	-1.08638	0.00915442	conserved protein
MMARE11_51330	0.620855	-0.687672	0.00935242	hydrolase
MMARE11_25510	2.45891	1.29802	0.0094275	conserved hypothetical membrane protein
MMARE11_31680	0.760856	-0.394305	0.00943614	conserved transmembrane transport protein-MmpLfamily
MMARE11_16760	0.420941	-1.24831	0.00950989	conserved hypothetical membrane protein
MMARE11p_00230	1.67618	0.745176	0.00953463	hypothetical protein
MMARE11_23180	0.442185	-1.17728	0.00960075	histidinol dehydrogenase HisD
MMARE11_10660	0.822128	-0.282565	0.00968618	phosphomannomutase, MrsA
MMARE11_12190	0.655728	-0.60883	0.00969895	bifunctional protein acetyl-/propionyl-coenzymeA carboxylase alpha chain AccA3
MMARE11_49600	0.466249	-1.10083	0.00970763	DNA topoisomerase I TopA
MMARE11_21230	0.696773	-0.521239	0.00975259	integration host factor MihF
MMARE11_40320	1.7112	0.775006	0.00981102	unidentified antibiotic-transport ATP-bindingprotein ABC transporter
MMARE11_47260	2.04717	1.03363	0.00982913	adenylosuccinate lyase, PurB
MMARE11_04280	1.84428	0.883061	0.00991076	long-chain-fatty-acid-CoA ligase
MMARE11_18220	0.867787	-0.204587	0.0100452	translation initiation factor IF-2 InfB
MMARE11_36880	0.882216	-0.180797	0.0100782	ATP-dependent CLP protease ATP-binding subunitClpX
MMARE11_06420	0.492146	-1.02284	0.0101597	aspartate decarboxylase, PanD_1
MMARE11_49970	0.706133	-0.501988	0.0101648	cysteine synthase CysK
MMARE11_51840	0.837173	-0.256403	0.0101778	propionyl-CoA carboxylase beta chain 4 AccD4_1
MMARE11_04620	1.58298	0.662642	0.0103462	acyl-CoA dehydrogenase FadE5
MMARE11_49160	0.641771	-0.63987	0.0104382	conserved integral membrane transport protein
MMARE11_34050	1.27524	0.350766	0.0104564	conserved hypothetical protein
MMARE11_33890	1.25739	0.330437	0.0105813	conserved hypothetical membrane protein
MMARE11_23640	1.44037	0.526435	0.0107346	conserved protein
MMARE11_04050	1.62637	0.701657	0.0107686	conserved hypothetical protein
MMARE11_40090	0.649064	-0.623568	0.0108301	[NAD] dependent malate oxidoreductase Mez_1
MMARE11_11440	0.815811	-0.293693	0.0108512	homoserine O-acetyltransferase MetA
MMARE11_46070	4.4182	2.14346	0.0109338	2-hydroxy-6-OXO-6-phenylhexa-2,4-dienoatehydrolase BphD_1
MMARE11_22870	1.71037	0.774305	0.0109839	bacterial-like globin, GlbN
MMARE11_09190	0.684105	-0.54771	0.0111365	conserved hypothetical membrane protein
MMARE11_37110	1.42143	0.507342	0.0113904	conserved hypothetical protein
MMARE11_42700	1.35947	0.443042	0.0114262	two-component transcriptional regulator TrcR
MMARE11_10130	0.773086	-0.3713	0.0114731	protease iv, Ssp
MMARE11_12180	1.41183	0.497564	0.0114939	peptide synthetase Nrp (peptide synthase)
MMARE11_22580	1.45519	0.541204	0.0115175	UDP-glucose 4-epimerase, GalE6
MMARE11_41310	0.44935	-1.15409	0.0115522	enoyl-CoA hydratase, EchA1_1
MMARE11_24860	1.69138	0.7582	0.0115752	acyltransferase, WS/DGAT/MGAT
MMARE11_02540	0.535763	-0.900333	0.0117164	Phospholipase C
MMARE11_36370	0.659943	-0.599586	0.0118366	conserved hypothetical transglutaminase-likeprotein
MMARE11_09300	0.649658	-0.622247	0.0118862	lipase/esterase LipG1
MMARE11_21450	1.29964	0.37811	0.0120831	riboflavin synthase beta chain RibH
MMARE11_24120	0.310588	-1.68693	0.0121199	antibiotic resistance ABC transporter, effluxprotein
MMARE11_34740	0.736331	-0.441573	0.0121762	aminotransferase(adenosylmethionine-8-amino-7-oxononanoate) BioA
MMARE11_49140	1.28691	0.363913	0.0123695	conserved hypothetical lipoprotein LpqF
MMARE11_32470	0.778372	-0.361468	0.012427	conserved hypothetical secreted protein
MMARE11_27420	1.16689	0.222674	0.0126605	isocitrate lyase AceAb
MMARE11_06750	0.824619	-0.2782	0.0126722	lipoprotein aminopeptidase LpqL
MMARE11_50450	0.605909	-0.722828	0.0127283	aspartate kinase Ask
MMARE11_09230	0.79515	-0.330701	0.0127515	50S ribosomal protein L1, RplA
MMARE11_08660	1.24461	0.315695	0.0127962	trypsin-like serine protease
MMARE11_30190	1.72586	0.787315	0.012866	non-ribosomal peptide synthetase
MMARE11_04680	0.813075	-0.298539	0.0129016	succinate dehydrogenase (iron-sulfur subunit),SdhA_1
MMARE11_18950	0.756914	-0.401798	0.0130441	conserved 35 kDa alanine rich protein
MMARE11_29630	2.08173	1.05778	0.0131616	short-chain dehydrogenase
MMARE11_32020	2.35996	1.23876	0.0131617	conserved hypothetical membrane protein
MMARE11_39120	0.785417	-0.34847	0.0132073	threonine synthase ThrC
MMARE11_26240	0.630818	-0.664703	0.0132387	glycine cleavage system H protein GcvH
MMARE11_05880	0.486373	-1.03986	0.0133366	chaperone protein, DnaJ
MMARE11_05980	0.526142	-0.926475	0.0133403	ketoacyl reductase
MMARE11_22950	0.751434	-0.412281	0.013356	conserved protein
MMARE11_13010	1.2812	0.357497	0.0134368	alternative RNA polymerase sigma-E factor(sigma-24) SigH (RpoE)
MMARE11_20840	1.88936	0.917896	0.0135843	conserved hypothetical protein
MMARE11_16340	0.760313	-0.395334	0.0136831	D-3-phosphoglycerate dehydrogenase SerA1
MMARE11_30270	0.416256	-1.26446	0.0137049	PE-PGRS family protein
MMARE11_41880	0.616095	-0.698776	0.0137754	fumarase Fum
MMARE11_11550	0.476536	-1.06934	0.0138456	PE-PGRS family protein, PE_PGRS9_4
MMARE11_39140	0.446444	-1.16345	0.0138672	diaminopimelate decarboxylase LysA
MMARE11_36710	1.5636	0.644874	0.0139566	glutamate 5-kinase protein ProB
MMARE11_22570	1.31444	0.394447	0.0139679	predicted pyridoxal phosphate-dependent enzyme
MMARE11_42950	0.597045	-0.744089	0.0140278	methionyl-tRNA synthetase MetS
MMARE11_26170	1.48569	0.571134	0.0140843	drug-transport transmembrane ATP-binding proteinABC transporter
MMARE11_45820	1.83023	0.872026	0.0140879	short-chain type dehydrogenase/reductase
MMARE11_45040	1.85315	0.889982	0.0142977	aminotransferase
MMARE11_32430	0.54577	-0.873635	0.0143636	glycerol-3-phosphate dehydrogenase GlpD1
MMARE11_18470	1.90223	0.927694	0.0143876	acyl-CoA dehydrogenase FadE21
MMARE11_09710	2.17859	1.1234	0.0145005	transcriptional regulator
MMARE11_50100	2.28378	1.19143	0.0146767	conserved hypothetical 13E12 repeat familyprotein
MMARE11_18160	0.76545	-0.385621	0.0148167	prolyl-tRNA synthetase ProS
MMARE11p_00600	0.517138	-0.95138	0.0149033	type VII secretion protein EccB
MMARE11_50190	4.07511	2.02684	0.014999	Fe-S-cluster-containing hydrogenase, HybA
MMARE11_43920	0.843755	-0.245103	0.0150219	periplasmic phosphate-binding lipoprotein PhoS2
MMARE11_14430	0.667071	-0.584089	0.0152083	cell division ATP-binding protein FtsE
MMARE11_27380	3.22514	1.68936	0.0152784	conserved hypothetical protein
MMARE11_27870	10.2502	3.35758	0.0153392	conserved hypothetical oxidoreducatse
MMARE11_18910	0.858531	-0.220058	0.0154256	cell division transmembrane protein FtsK
MMARE11_32050	0.705308	-0.503676	0.0154364	PE-PGRS family protein
MMARE11_21390	1.37822	0.462806	0.0154787	ribulose-phosphate 3-epimerase Rpe
MMARE11_49900	1.34251	0.42493	0.0154858	conserved protein with endoribonuclease L-PSPdomain
MMARE11_03400	0.795805	-0.329512	0.0154977	NAD(P) transhydrogenase (subunit alpha) PntAa
MMARE11_31620	0.824245	-0.278855	0.0155189	pyruvate dehydrogenase (E2 component) SucB
MMARE11_18780	0.66403	-0.59068	0.0155335	acyl-CoA dehydrogenase FadE18_1
MMARE11_15860	2.03963	1.0283	0.015747	conserved hypothetical membrane protein
MMARE11_20580	1.76127	0.816617	0.0158485	fatty-acid-CoA ligase FadD9
MMARE11_47930	0.808212	-0.307194	0.0158879	MCE-family lipoprotein LprN
MMARE11_31960	0.824875	-0.277753	0.0162427	glutamine synthetase GlnA2
MMARE11_03300	0.82184	-0.28307	0.0164904	short-chain type dehydrogenase/reductase
MMARE11_36860	0.860062	-0.217488	0.0165692	pyruvate:ferredoxin oxidoreductase, PorA, alphasubunit
MMARE11_47290	0.473579	-1.07832	0.0169508	conserved hypothetical membrane protein
MMARE11_07450	0.425624	-1.23235	0.0171704	mycolic acid synthase PcaA
MMARE11_23790	1.67295	0.742391	0.0174153	phenylalanyl-tRNA synthetase, alpha chain PheS
MMARE11_01770	0.892568	-0.163966	0.0174548	6 kDa culture filtrate antigen EsxA_1 (earlysecreted antigenic target-Esat6)
MMARE11_30850	0.870918	-0.199392	0.0174661	conserved secreted antigen Wag31
MMARE11_12320	1.46339	0.549312	0.0174849	transmembrane carbonic anhydrase, SulP_2
MMARE11_11620	0.714613	-0.484765	0.0175536	succinate dehydrogenase (flavoprotein subunit)SdhA
MMARE11_36430	2.72514	1.44633	0.0176746	conserved hypothetical membrane protein ComEA
MMARE11_50040	1.3578	0.441269	0.0176836	anti-anti-sigma regulatory factor
MMARE11_23940	1.26234	0.336104	0.0176838	polyketide synthase Pks7
MMARE11_09910	0.838184	-0.254662	0.0177317	50S ribosomal protein L22, RplV
MMARE11_34620	0.884725	-0.176699	0.0178484	PPE family protein, PPE5
MMARE11p_00040	0.55574	-0.847517	0.0178973	hypothetical protein
MMARE11_18290	1.69549	0.761702	0.0180731	ABC-type sugar transport protein, ATPasecomponent
MMARE11_24950	0.678645	-0.559271	0.0180745	serine/threonine-protein kinase transcriptionalregulatory protein PknK
MMARE11_15690	4.04888	2.01752	0.0180916	conserved hypothetical protein
MMARE11_48110	0.582653	-0.779291	0.0183432	fatty-acid-CoA ligase FadD19_1
MMARE11_07280	0.63207	-0.661843	0.0184233	enoyl-CoA hydratase EchA2
MMARE11_26980	0.712981	-0.488064	0.018584	secreted antigen 85-B FbpB
MMARE11_39510	1.55666	0.638453	0.0186754	dehydrogenase fad flavoprotein Gmcoxidoreductase
MMARE11_25280	0.711596	-0.490869	0.019006	copper methylamine oxidase precursor, MaoX
MMARE11_34510	2.50348	1.32393	0.0191214	conserved hypothetical membrane protein
MMARE11_09450	0.616095	-0.698776	0.0191514	ribonucleotide-transport ATP-binding protein ABCtransporter, Mkl
MMARE11_06160	1.26111	0.334689	0.0191599	membrane-anchored adenylyl cyclase Cya_1
MMARE11_44680	1.88699	0.916086	0.0191842	citrate synthase II CitA
MMARE11_36380	0.759115	-0.39761	0.0192564	conserved hypothetical protein
MMARE11_04110	1.25919	0.332492	0.0193076	conserved hypothetical protein
MMARE11_52700	0.5947	-0.749765	0.0196849	type VII secretion EccB1
MMARE11_11080	0.579286	-0.787651	0.0197477	GMP synthase, GuaA
MMARE11_29520	0.81806	-0.289722	0.0198876	polyprenol-monophosphomannose synthase, Ppm1A
MMARE11_00920	1.95436	0.966693	0.0200839	conserved hypothetical protein
MMARE11_32460	0.618279	-0.693669	0.0201132	conserved hypothetical protein
MMARE11_09340	1.37089	0.455116	0.020123	alpha-mannosidase
MMARE11_32450	0.56746	-0.81741	0.0202746	flavoprotein
MMARE11_36230	2.44124	1.28761	0.0203425	sulfate-transport integral membrane protein ABCtransporter CysW
MMARE11p_00730	2.24097	1.16412	0.0203595	Adenylate and Guanylate cyclase catalytic domainprotein
MMARE11_51230	0.196072	-2.35055	0.0204933	PE-PGRS family protein
MMARE11_16410	1.87544	0.907228	0.0205124	conserved transmembrane transport proteinMmpL1_1
MMARE11_32172	0.659522	-0.600507	0.0205125	PE-PGRS family protein
MMARE11_17310	0.83234	-0.264754	0.0207031	50S ribosomal protein L19 RplS
MMARE11_10300	1.9712	0.979075	0.0207773	alternative RNA polymerase sigma factor (RpoE),SigL
MMARE11_46090	2.70385	1.43501	0.0208187	dehydrogenase
MMARE11_16860	0.648966	-0.623786	0.0209277	methyltransferase
MMARE11_19460	1.59469	0.673274	0.0209712	TRK system potassium uptake protein CeoC
MMARE11_16740	1.96843	0.977048	0.0213269	glycosyl transferase
MMARE11_03820	1.40762	0.493257	0.0214388	conserved Mce associated transmembrane protein
MMARE11_13150	1.83269	0.87396	0.0214643	conserved hypothetical threonine and prolinerich protein
MMARE11_41940	0.605909	-0.722828	0.0217064	acyl-[acyl-carrier protein] desaturase DesA2
MMARE11_43610	0.300722	-1.7335	0.0217143	PE-PGRS family protein
MMARE11_22030	1.84491	0.883554	0.0218047	transcriptional regulatory protein
MMARE11_36600	0.656136	-0.607933	0.0219691	gamma-glutamyl phosphate reductase protein ProA
MMARE11_43800	2.59072	1.37335	0.0221989	conserved hypothetical oxidoreductase
MMARE11_10240	0.849216	-0.235796	0.022301	conserved protein
MMARE11_07590	0.658028	-0.60378	0.0223615	short-chain type oxidoreductase
MMARE11_38370	0.539064	-0.891473	0.0225377	acyl-CoA dehydrogenase
MMARE11_13080	0.623763	-0.68093	0.022631	acetyltransferase
MMARE11_20030	1.49506	0.5802	0.0226496	catalase
MMARE11_42830	0.740076	-0.434255	0.022721	ribose-phosphate pyrophosphokinase PrsA
MMARE11_40850	0.483623	-1.04804	0.0229814	PE-PGRS family protein
MMARE11_51140	1.47514	0.560851	0.0232407	prephenate dehydrogenase TyrA
MMARE11_31060	0.645445	-0.631633	0.0232612	conserved lipoprotein LppM
MMARE11_21980	1.52153	0.605523	0.0233094	thioredoxin TrxA
MMARE11_13170	0.773325	-0.370854	0.0234387	transcriptional regulator, TetR family
MMARE11_37090	0.663186	-0.592515	0.0234443	molybdopterin biosynthesis protein MoeY_1
MMARE11_10030	0.793195	-0.334253	0.0234713	50S ribosomal protein L24, RplX
MMARE11_42150	0.464633	-1.10584	0.0235287	enoyl-CoA hydratase EchA9
MMARE11_00770	1.55129	0.633469	0.0235763	conserved hypothetical protein
MMARE11_41110	1.42625	0.512226	0.0236637	conserved hypothetical protein
MMARE11_29510	0.808397	-0.306863	0.0237034	polyprenol-monophosphomannose synthase, Ppm1B
MMARE11_25450	1.8025	0.849996	0.0241153	conserved hypothetical protein
MMARE11_49420	1.28799	0.365125	0.0241438	EsaT-6 like protein EsxP_1
MMARE11_20170	1.30734	0.38663	0.0245102	conserved hypothetical protein
MMARE11_22630	0.617617	-0.695216	0.0246665	fatty acyl-AMP ligase FadD25
MMARE11_10090	0.590014	-0.761179	0.0247204	30S ribosomal protein S5, RpsE
MMARE11_22880	0.616095	-0.698776	0.0247534	fatty acyl-CoA reductase
MMARE11_52000	0.56006	-0.836347	0.0249548	acyltransferase
MMARE11_11920	1.71217	0.775827	0.025067	glycerol-3-phosphate dehydrogenase GlpD2
MMARE11_03310	0.764823	-0.386801	0.0252086	quinone oxidoreductase
MMARE11_46100	2.74539	1.45701	0.0252903	IS2 transposase TnpB
MMARE11_29340	2.31983	1.21402	0.025323	sugar ABC transporter
MMARE11_43490	0.739355	-0.435662	0.025433	acyl-CoA dehydrogenase FadE12
MMARE11_17410	15.1396	3.92026	0.0255281	conserved hypothetical membrane protein
MMARE11_04930	1.73314	0.793387	0.0255547	transcriptional regulatory protein (possiblyTetR-family)
MMARE11_29330	2.07722	1.05465	0.0260214	sugar-transport ATP-binding protein ABCtransporter
MMARE11_39650	0.616095	-0.698776	0.0260855	transcriptional regulatory protein EmbR
MMARE11_36720	1.71789	0.780637	0.0261782	GTP1/OBG-family GTP-binding protein Obg
MMARE11_19280	1.84605	0.88444	0.0262883	conserved hypothetical membrane protein
MMARE11_17520	2.77684	1.47344	0.026487	transcriptional regulatory protein
MMARE11_36280	0.836494	-0.257573	0.0267364	conserved hypothetical glycosyl hydrolase
MMARE11_09220	0.860146	-0.217347	0.0270322	50S ribosomal protein L11, RplK
MMARE11_16300	0.655228	-0.609931	0.0270542	acetolactate synthase (small subunit) IlvN
MMARE11_19240	0.775416	-0.366957	0.0274107	soluble pyridine nucleotide transhydrogenaseSthA
MMARE11_32190	1.50339	0.588222	0.0274423	conserved hypothetical protein
MMARE11_43420	0.740716	-0.433008	0.0278544	two-component sensor kinase MprB
MMARE11_46840	0.683724	-0.548513	0.0278683	metal cation transporter p-type ATPase, CtpV
MMARE11_06880	1.93698	0.953809	0.0280055	two-component sensor and regulator
MMARE11_17350	1.53882	0.621824	0.0280633	conserved hypothetical protein
MMARE11_31920	0.475293	-1.07311	0.0280687	PE-PGRS family protein
MMARE11_21520	0.658205	-0.60339	0.0281442	transcriptional regulatory protein WhiA
MMARE11_23520	0.801133	-0.319886	0.0282328	two-component system transcriptional regulator
MMARE11_30080	1.77973	0.83166	0.0282444	conserved protein
MMARE11_19090	2.04359	1.03111	0.0282583	conserved protein
MMARE11_09880	0.797712	-0.32606	0.0283479	50S ribosomal protein L23, RplW
MMARE11_29561	1.35448	0.43774	0.0286493	conserved hypothetical membrane protein
MMARE11_34920	4.32393	2.11234	0.0286862	hypothetical protein
MMARE11_35320	0.631335	-0.663523	0.028717	conserved hypothetical membrane protein
MMARE11_44780	4.78503	2.25853	0.0287303	conserved hypothetical transmembrane protein
MMARE11_09790	1.70157	0.766863	0.02878	transcriptional regulator (TetR family)
MMARE11_02810	1.69638	0.762463	0.0290467	conserved hypothetical protein
MMARE11_24190	0.627474	-0.672372	0.0292663	hypothetical membrane protein
MMARE11_37310	1.50426	0.589053	0.0293664	citrate (pro-3s)-lyase (beta subunit) CitE
MMARE11_40340	1.92171	0.942389	0.0294274	conserved integral membrane protein
MMARE11_51940	0.617894	-0.69457	0.0294692	UDP-galactopyranose mutase Glf
MMARE11_06550	0.717595	-0.478759	0.029627	fatty acyl-AMP ligase FadD30
MMARE11_50340	1.41	0.495691	0.029736	selenocysteine lyase, CsdB
MMARE11_45790	2.49308	1.31793	0.0297408	acyl-CoA dehydrogenase
MMARE11_16960	0.621005	-0.687323	0.0299063	phenolpthiocerol synthesis type-I polyketidesynthase PpsA
MMARE11_23470	1.53465	0.617907	0.0299569	Cytochrome transmembrane ATP-binding protein ABCtransporter CydD
MMARE11_16890	0.801891	-0.318521	0.0300425	daunorubicin-DIM-transport integral membraneprotein ABC transporter DrrC
MMARE11p_00430	1.89404	0.921465	0.03016	Transcription factor WhiB
MMARE11_52270	0.576358	-0.794962	0.0303605	transcriptional regulatory repressor protein(TetR-family) EthR
MMARE11_31610	0.78518	-0.348904	0.0305691	short-chain dehydrogenase EphD
MMARE11_09640	0.820526	-0.28538	0.0307893	30S ribosomal protein S7, RpsG
MMARE11_03990	0.77782	-0.362491	0.030951	conserved secretory protein
MMARE11_24900	0.56006	-0.836347	0.0309624	succinate-semialdehyde dehydrogenase [NADP+]dependent (SsdH) GabD2
MMARE11_12650	1.62763	0.702774	0.0311932	two-component sensory transductiontranscriptional regulatory protein MtrA
MMARE11_20310	0.778318	-0.361568	0.0312074	threonyl-tRNA synthetase ThrS
MMARE11_44520	0.547767	-0.868366	0.0313898	8-amino-7-oxononanoate synthase BioF2_1
MMARE11_48760	3.10677	1.63542	0.0315184	conserved hypothetical secreted protein
MMARE11_12150	1.34394	0.426473	0.0318073	anti-sigma factor RsbW
MMARE11_15350	0.554817	-0.849915	0.0318218	NAD-dependent epimerase/dehydratase familyprotein
MMARE11_40070	1.53358	0.616905	0.031833	short-chain type dehydrogenase/reductase
MMARE11_32510	0.668171	-0.58171	0.0319026	zinc-dependent alcohol dehydrogenase AdhE2
MMARE11_44340	1.53644	0.619594	0.0320172	conserved hypothetical membrane protein
MMARE11_39910	1.47856	0.564197	0.0322784	oxidoreductase
MMARE11_04870	1.39622	0.48153	0.0323002	acyl-CoA dehydrogenase FadE6
MMARE11_16900	0.863746	-0.211322	0.0323572	daunorubicin-DIM-transport integral membraneprotein ABC transporter DrrB
MMARE11_28800	1.54923	0.631553	0.0325155	RES domain protein
MMARE11_08270	1.48932	0.574657	0.0325884	conserved hypothetical membrane protein
MMARE11_16180	2.84823	1.51007	0.0326535	putative exporter
MMARE11_22590	1.57548	0.655796	0.0330191	conserved hypothetical membrane protein
MMARE11_26120	1.36226	0.446005	0.0330653	membrane-bound C-5 sterol desaturase Erg3
MMARE11_18010	0.694501	-0.525951	0.0330722	high-affinity nickel permease, HoxN
MMARE11_25430	1.95587	0.967808	0.0333742	conserved hypothetical protein
MMARE11_51710	0.787894	-0.343927	0.0338175	conserved hypothetical protein
MMARE11_50990	3.30694	1.7255	0.0339003	D-3-phosphoglycerate dehydrogenase SerA4
MMARE11_21900	1.52756	0.611231	0.0342521	conserved ATP-binding protein ABC transporter
MMARE11_43370	0.701536	-0.51141	0.0342595	conserved hypothetical serine rich protein
MMARE11_12810	2.73926	1.45379	0.0344503	linoleoyl-CoA desaturase, DesA3
MMARE11_18760	0.72143	-0.471068	0.0345516	short-chain type dehydrogenase/reductase
MMARE11_08600	0.52341	-0.933986	0.0346323	FAD-linked oxidoreductase
MMARE11_10080	0.812217	-0.300063	0.0346821	50S ribosomal protein L18, RplR
MMARE11_37400	1.36342	0.447232	0.0348112	conserved proline rich membrane protein
MMARE11_23880	0.70311	-0.508177	0.0349216	acetylornithine aminotransferase ArgD
MMARE11_44650	1.63679	0.710869	0.0349297	citrate synthase I GltA2
MMARE11_04700	0.713629	-0.486753	0.0349994	conserved hypothetical protein
MMARE11_27350	0.605909	-0.722828	0.0351541	oxidoreductase FadB5
MMARE11_19340	0.556842	-0.844659	0.0351904	PE-PGRS family protein
MMARE11_33840	0.708749	-0.496653	0.0357174	haloalkane dehalogenase
MMARE11_31570	2.00072	1.00052	0.0358211	branched-chain amino acid transaminase IlvE
MMARE11_09410	1.22104	0.288111	0.0359221	50S ribosomal protein L10, RplJ
MMARE11_35200	1.75846	0.814317	0.036219	conserved hypothetical secreted protein
MMARE11_13550	0.845826	-0.241567	0.0363122	non-heme haloperoxidase Hpx
MMARE11_47560	3.34029	1.73997	0.036536	conserved hypothetical protein
MMARE11_12410	0.757289	-0.401085	0.0367205	dTDP-6-deoxy-L-lyxo-4-hexulose reductase RmlD
MMARE11_06970	0.845066	-0.242865	0.0367637	periplasmic superoxide dismutase [Cu-Zn] SodC
MMARE11_19010	0.782358	-0.354099	0.0372244	recombinase A RecA
MMARE11_36910	0.767139	-0.38244	0.0374004	ATP-dependent CLP protease proteolytic subunit 1ClpP1
MMARE11_36390	0.817506	-0.290698	0.0381719	conserved hypothetical protein
MMARE11_05070	0.820871	-0.284773	0.038278	membrane-anchored mycosin MycP3
MMARE11_22560	1.66163	0.732602	0.0383577	nucleotidyltransferase
MMARE11_03930	1.26666	0.341024	0.038514	beta-glucosidase BglS
MMARE11_35900	0.77802	-0.36212	0.0386392	chaperone protein DnaJ2
MMARE11_11600	0.387549	-1.36755	0.0387917	PE-PGRS family protein
MMARE11_00640	0.699453	-0.515702	0.0387962	myo-inositol-1-phosphate synthase Ino1
MMARE11_14810	2.89029	1.53121	0.0388544	short-chain type dehydrogenase/reductase
MMARE11_03280	1.53259	0.615973	0.0388706	O-Methyltransferase
MMARE11_13920	2.3575	1.23726	0.0390218	transcriptional regulatory protein
MMARE11_21610	0.520024	-0.943351	0.039122	glyceraldehyde 3-phosphate dehydrogenase Gap
MMARE11_12510	0.642613	-0.637979	0.0391395	phosphomannomutase PmmA
MMARE11_41870	0.816035	-0.293296	0.0392648	fructose 1,6-bisphosphatase GlpX
MMARE11_22890	0.646632	-0.628983	0.0393846	ketoacyl reductase
MMARE11_47050	5.27456	2.39905	0.0394	conserved hypothetical protein
MMARE11_20860	2.60924	1.38363	0.0396046	conserved hypothetical alanine and leucine richprotein
MMARE11_21300	0.692752	-0.52959	0.0397102	lipase LipH
MMARE11_51980	0.777587	-0.362924	0.0398937	acyltransferase
MMARE11_15840	0.695649	-0.523569	0.0400109	conserved hypothetical protein
MMARE11_06580	1.21611	0.282279	0.0401177	F420-dependent glucose-6-phosphate dehydrogenaseFgd1
MMARE11_19640	1.5374	0.620493	0.04012	conserved hypothetical protein
MMARE11_12290	0.65489	-0.610675	0.0401602	phosphoribosylaminoimidazole carboxylasecatalytic subunit PurE (air carboxylase) (AirC)
MMARE11_51740	0.861534	-0.21502	0.0401742	short-chain type dehydrogenase/reductase
MMARE11_22500	1.51181	0.596277	0.0404214	conserved hypothetical sugar kinase
MMARE11_11010	1.58425	0.663799	0.04044	transcriptional regulator
MMARE11_14960	1.33603	0.417949	0.0404603	citrate lyase beta subunit, CitE_2
MMARE11_34490	0.392802	-1.34813	0.0405203	methyltransferase (methylase)
MMARE11_07640	1.49961	0.584592	0.0407872	two-component sensor histidine kinase SenX3
MMARE11p_00440	1.57008	0.650838	0.0408969	hypothetical protein
MMARE11_25810	1.48013	0.565725	0.0410507	conserved hypothetical protein
MMARE11_22370	0.784409	-0.350322	0.0412884	conserved hypothetical methyltransferase
MMARE11_39130	0.825293	-0.277021	0.0413279	homoserine dehydrogenase ThrA
MMARE11_37190	0.847347	-0.238975	0.0416145	conserved hypothetical membrane protein
MMARE11_22290	1.71733	0.780169	0.0416516	hypothetical transmembrane protein
MMARE11_23200	0.695649	-0.523569	0.0416952	imidazole glycerol-phosphate dehydratase HisB
MMARE11_49080	0.437599	-1.19232	0.0417151	carbonic anhydrase
MMARE11_51150	1.95899	0.970108	0.041778	conserved hypothetical protein
MMARE11_05940	0.447642	-1.15958	0.0418355	PE family protein
MMARE11_51360	1.55875	0.640392	0.0423134	two-component transcriptional regulatory proteinTcrX
MMARE11_04660	1.70969	0.773737	0.0426803	conserved hypothetical protein
MMARE11_17420	1.95632	0.968141	0.0427159	mycobactin utilization protein ViuB
MMARE11p_00780	2.57768	1.36607	0.0427445	Type IV secretory pathway, VirB4 components
MMARE11_46640	0.616095	-0.698776	0.0427907	acyl-[acyl-carrier protein] desaturase DesA1
MMARE11_19130	0.646587	-0.629084	0.0430052	acyl-CoA dehydrogenase FadE20
MMARE11_42900	0.85211	-0.230889	0.0430316	polyketide synthase Pks16
MMARE11_36450	0.729795	-0.454437	0.0430787	acyl-CoA dehydrogenase FadE18_2
MMARE11_05060	0.616095	-0.698776	0.043183	type VII secretion EccD3
MMARE11_29030	0.46348	-1.10942	0.0433396	20-beta-hydroxysteroid dehydrogenase FabG3_1
MMARE11_25390	1.19498	0.256988	0.0433975	putative signal-transduction protein containingcAMP-binding and CBS domains
MMARE11_50440	0.78273	-0.353412	0.043484	aspartate-semialdehyde dehydrogenase Asd
MMARE11_45260	2.6173	1.38808	0.0435078	conserved hypothetical secreted protein
MMARE11_39870	1.32523	0.406238	0.0436255	amidase AmiB2
MMARE11_11910	0.818011	-0.289808	0.0440438	dihydrolipoamide dehydrogenase LpdA
MMARE11_18530	0.908056	-0.139147	0.0441154	bifunctional protein polyribonucleotidenucleotidyltransferase GpsI
MMARE11_12820	1.46699	0.552863	0.0442121	linoleoyl-CoA desaturase, DesA3_1
MMARE11_47220	1.73988	0.79899	0.0443511	aldehyde dehydrogenase
MMARE11_02820	1.20952	0.274438	0.044469	transmembrane acyltransferase
MMARE11_04420	0.716901	-0.480154	0.0446503	PE-PGRS family protein
MMARE11_09920	0.574395	-0.799886	0.0446989	30S ribosomal protein S3, RpsC
MMARE11_52320	0.788725	-0.342406	0.0447004	immunogenic protein Mpt64
MMARE11_23230	0.698444	-0.517783	0.0447338	inositol-monophosphatase ImpA
MMARE11_18710	1.66691	0.737178	0.0447957	fatty acid-CoA ligase FadD13_1
MMARE11_36780	0.65532	-0.609729	0.0452002	folylpolyglutamate synthase protein FolC
MMARE11p_00300	2.95772	1.56449	0.0454719	hypothetical protein
MMARE11_15730	1.19107	0.252262	0.04549	phosphoserine phosphatase SerB2
MMARE11_23570	1.36941	0.453556	0.045636	dephospho-CoA kinase CoaE
MMARE11_38790	1.54833	0.630717	0.0462561	ATP-dependent helicase DinG
MMARE11_47530	0.652463	-0.616033	0.0464031	conserved membrane protein
MMARE11_45510	0.497496	-1.00724	0.046407	conserved hypothetical secreted protein
MMARE11_02940	0.873567	-0.19501	0.0465743	serine protease PepA
MMARE11_01360	0.759749	-0.396405	0.0466276	acyl-CoA dehydrogenase FadE25_2
MMARE11_09260	0.790123	-0.33985	0.0469599	methoxy mycolic acid synthase 4, MmaA4
MMARE11_31450	1.50336	0.58819	0.0472124	conserved integral membrane protein
MMARE11_32610	1.41435	0.500141	0.0472339	cytochrome P450 124A1, Cyp124A1
MMARE11_46820	0.357026	-1.4859	0.047607	conserved hypothetical protein
MMARE11_15390	2.15672	1.10884	0.0478087	Multicopper oxidase, type 1, CueO
MMARE11_38990	0.916446	-0.125878	0.0479601	ATP synthase alpha chain AtpA
MMARE11_21030	0.798496	-0.324643	0.0479978	elongation factor P Efp
MMARE11_22120	0.605909	-0.722828	0.0481407	enoyl-[acyl-carrier-protein] reductase, InhA
MMARE11_47040	1.50691	0.591595	0.0481417	dihydrolipoamide dehydrogenase, LpdB
MMARE11_35390	2.58368	1.36943	0.0484263	tryptophan halogenase
MMARE11_05020	0.874552	-0.193384	0.0486952	PPE family protein, PPE4
MMARE11_38970	0.913221	-0.130965	0.0487568	ATP synthase beta chain AtpD
MMARE11_23220	0.736439	-0.441362	0.0487735	phosphoribosylformimino-5-aminoimidazolecarboxamide ribotide isomerase HisA
MMARE11p_00110	1.43832	0.524388	0.0488427	PPE-repeat proteins
MMARE11_37170	1.16121	0.215628	0.0489979	glycerol-3-phosphate acyltransferase PlsB2
MMARE11_17220	0.604343	-0.726561	0.0490382	D-amino acid aminohydrolase
MMARE11_03660	4.78503	2.25853	0.0491288	monooxygenase
MMARE11_48140	0.56006	-0.836347	0.0493719	conserved hypothetical protein
MMARE11_40330	2.11544	1.08096	0.0495003	tetronasin-transport integral membrane proteinABC transporter
