# Supplementary material for: Integrated transcriptomic and proteomic analysis of pathogenic mycobacteria and their esx-1 mutants reveal secretion-dependent regulation of ESX-1 substrates and WhiB6 as a transcriptional regulator
Source: PLoS One. 2019 Jan 23;14(1):e0211003. doi: 10.1371/journal.pone.0211003 (PMC6343904; doi:10.1371/journal.pone.0211003)
Supplement: S2 Table — Proteins with greater than 2-fold change were considered significantly differentially expressed. (XLSX) [file pone.0211003.s002.xlsx]

## Sheet: Proteome (S2)
Complete list of proteins of which expression is changed in M. marinum eccCb1 transposon mutant compared to its isogenic wild-type strain E11 during growth in 7H9 culture medium.
Gene ID	FoldChange	log2FoldChange	pval	Product
MMARE11_04980	0.161967	-2.62623	0.00146054	MMARE11_04980 type VII secretion EccA3 587271:589133 forward MW:66968
MMARE11_34890	0.177067	-2.49764	0.00146101	MMARE11_34890 PE-PGRS family protein 4232991:4235765 forward MW:81959
MMARE11_22930	0.178867	-2.48304	0.00146851	plsB1 acyltransferase, PlsB1 2725323:2727197 forward MW:69705
MMARE11_38800	0.1811	-2.46514	0.00152148	glgP glycogen phosphorylase GlgP' 1-phosphate 4714500:4717091 reverse MW:95746
MMARE11_00010	0.1926	-2.37632	0.00174222	dnaA Chromosomal replication initiator protein DnaA 1:1533 forward MW:56629
MMARE11_52690	0.194467	-2.36241	0.00175571	MMARE11_52690 type VII secretion protein EccA1 6278870:6280591 forward MW:62230
MMARE11_16960	0.195433	-2.35525	0.00180205	Cluster of ppsA phenolpthiocerol synthesis type-I polyketide synthase PpsA 2044330:2049138 reverse MW:169825 (MMARE11_16960)
MMARE11_50480	0.197	-2.34373	0.00184413	leuA 2-isopropylmalate synthase LeuA 6024153:6025973 forward MW:66040
MMARE11_37110	0.197533	-2.33983	0.00186779	MMARE11_37110 conserved hypothetical protein 4521614:4522030 reverse MW:15773
MMARE11_51740	0.207167	-2.27114	0.00187037	MMARE11_51740 short-chain type dehydrogenase/reductase 6161971:6162735 forward MW:27339
MMARE11_07440	0.209267	-2.25659	0.00191101	umaA mycolic acid synthase UmaA 898243:899103 forward MW:33040
MMARE11_09270	0.211533	-2.24104	0.0019393	mmaA3 methoxy mycolic acid synthase 3, MmaA3 1134010:1134891 reverse MW:33628
MMARE11_42950	0.213033	-2.23085	0.00196916	metS methionyl-tRNA synthetase MetS 5205557:5207113 forward MW:58059
MMARE11_13080	0.2147	-2.21961	0.00198361	MMARE11_13080 acetyltransferase 1576494:1576976 reverse MW:17804
MMARE11_04620	0.2167	-2.20623	0.00199458	fadE5 acyl-CoA dehydrogenase FadE5 548777:550612 reverse MW:66365
MMARE11_11620	0.217767	-2.19914	0.00200176	sdhA succinate dehydrogenase (flavoprotein subunit) SdhA 1403267:1405021 reverse MW:64303
MMARE11_50350	0.2179	-2.19826	0.00201658	MMARE11_50350 s-adenosyl-L-methionine-dependentmethyltransferas e 6006420:6007385 reverse MW:35369
MMARE11_37000	0.2187	-2.19297	0.00209873	pepN aminopeptidase N PepN 4506881:4509460 forward MW:93910
MMARE11_14230	0.219533	-2.18749	0.00211818	fadE24 acyl-CoA dehydrogenase FadE24 1702250:1703647 reverse MW:49805
MMARE11_28410	0.225167	-2.15093	0.00212492	mmaA2_1 methoxy mycolic acid synthase 2 MmaA2_1 3389660:3390523 forward MW:32901
MMARE11_15700	0.226633	-2.14157	0.00213496	adh NADP-dependent alcohol dehydrogenase Adh 1874763:1875803 reverse MW:37152
MMARE11_39870	0.227267	-2.13754	0.00213903	amiB2 amidase AmiB2 4848792:4850180 reverse MW:49156
MMARE11_43490	0.227667	-2.13501	0.00214981	fadE12 acyl-CoA dehydrogenase FadE12 5267778:5268944 forward MW:41678
MMARE11_36310	0.227667	-2.13501	0.0021692	lepA GTP-binding protein LepA 4415280:4417196 reverse MW:70638
MMARE11_11920	0.2289	-2.12721	0.00223966	glpD2 glycerol-3-phosphate dehydrogenase GlpD2 1433405:1435162 forward MW:63231
MMARE11_52670	0.2302	-2.11904	0.00229074	MMARE11_52670 Esx-1 secretion associated protein EspG1 6277429:6278268 forward MW:29739
MMARE11_26170	0.2319	-2.10843	0.00230832	MMARE11_26170 drug-transport transmembrane ATP-binding protein ABC transporter 3152964:3154883 reverse MW:71324
MMARE11_35220	0.232733	-2.10325	0.00231083	MMARE11_35220 conserved membrane protein 4268646:4270019 reverse MW:48524
MMARE11_36370	0.233	-2.1016	0.00232277	putative transglutaminase-like protein
MMARE11_24070	0.233567	-2.09809	0.00234546	MMARE11_24070 long-chain acyl-CoA synthase 2883560:2886541 forward MW:107070
MMARE11_37120	0.233867	-2.09624	0.00238665	gdh NAD-dependent glutamate dehydrogenase Gdh 4522027:4526865 reverse MW:176526
MMARE11_32350	0.234067	-2.09501	0.00242307	aceE pyruvate dehydrogenase E1 component AceE 3945487:3948276 forward MW:103388
MMARE11_51860	0.2052	-2.2849	0.00245164	fadD32 fatty acyl-AMP ligase FadD32 6191939:6193828 reverse MW:68861
MMARE11_07300	0.236167	-2.08212	0.00250258	putA_1 aldehyde dehydrogenase, PutA_1 884497:886020 forward MW:54677
MMARE11_24570	0.2363	-2.08131	0.0025168	engA GTP-binding protein, EngA 2945879:2947288 forward MW:50795
MMARE11_22560	0.236467	-2.08029	0.00257781	MMARE11_22560 nucleotidyltransferase 2667173:2667910 reverse MW:28178
MMARE11_47260	0.236657	-2.07913	0.00259463	purB adenylosuccinate lyase, PurB 5666754:5668181 reverse MW:51185
MMARE11_12710	0.2369	-2.07765	0.00262222	secA1 preprotein translocase SecA1 1 subunit 1534128:1536980 forward MW:106166
MMARE11_37130	0.237667	-2.07299	0.00267347	MMARE11_37130 ATP-binding component of an ABC transporter 4527080:4528756 reverse MW:61922
MMARE11_23800	0.2398	-2.0601	0.00267895	pheT phenylalanyl-tRNA synthetase, beta chain PheT 2829583:2832072 forward MW:88057
MMARE11_32450	0.240067	-2.05849	0.00268378	MMARE11_32450 flavoprotein 3958497:3960077 forward MW:55398
MMARE11_05080	0.2402	-2.05769	0.00278345	MMARE11_05080 type VII secretion EccE3 601051:602064 forward MW:36673
MMARE11_52000	0.241733	-2.04851	0.00283806	MMARE11_52000 acyltransferase 6209856:6210635 reverse MW:28506
MMARE11_16900	0.2419	-2.04752	0.00289303	drrB daunorubicin-DIM-transport integral membrane protein ABC transporter DrrB 2021409:2022278 reverse MW:30905
MMARE11_10710	0.246567	-2.01995	0.00290165	MMARE11_10710 conserved hypothetical transmembrane protein 1283796:1284266 reverse MW:17662
MMARE11_45020	0.2486	-2.0081	0.00294005	fadB fatty oxidation protein FadB 5436805:5438949 reverse MW:75672
MMARE11_40440	0.2513	-1.99252	0.00295618	fadD6 fatty-acid-CoA ligase FadD6 4917568:4919349 reverse MW:63763
MMARE11_35750	0.251433	-1.99175	0.00295806	glyS glycyl-tRNA synthetase GlyS 4345032:4346423 reverse MW:52657
MMARE11_16760	0.251667	-1.99041	0.00300114	MMARE11_16760 conserved hypothetical membrane protein 1990547:1991803 reverse MW:45048
MMARE11_15840	0.251767	-1.98984	0.0030204	MMARE11_15840 conserved hypothetical protein 1890358:1891341 forward MW:36239
MMARE11_05060	0.253133	-1.98203	0.00311775	MMARE11_05060 type VII secretion EccD3 598222:599640 forward MW:47855
MMARE11_51980	0.257233	-1.95885	0.00314353	MMARE11_51980 acyltransferase 6208278:6209063 reverse MW:28946
MMARE11_24150	0.2578	-1.95568	0.00317344	tyrS tyrosyl-tRNA synthase, TyrS 2891930:2893222 forward MW:46675
MMARE11_24900	0.258033	-1.95437	0.00319005	gabD2 succinate-semialdehyde dehydrogenase [NADP+] dependent (SsdH) GabD2 2981535:2983091 forward MW:55126
MMARE11_52630	0.259233	-1.94768	0.00320451	conserved hypothetical protein, whiB6
MMARE11_19010	0.2606	-1.94009	0.00321502	recA recombinase A RecA 2271421:2272461 forward MW:36893
MMARE11_41030	0.2608	-1.93898	0.00324023	typA GTP-binding translation elongation factor TypA 4989945:4991831 reverse MW:67699
MMARE11_32550	0.261233	-1.93659	0.00326352	MMARE11_32550 oxidoreductase 3968483:3969436 forward MW:33607
MMARE11_04450	0.2641	-1.92084	0.00330136	fadE4 acyl-CoA dehydrogenase FadE4 525169:526875 forward MW:63909
MMARE11_35230	0.265633	-1.91249	0.00334423	MMARE11_35230 conserved protein 4270016:4271533 reverse MW:54521
MMARE11_07420	0.266667	-1.90689	0.00336634	icl isocitrate lyase Icl 895791:897077 forward MW:47284
MMARE11_39650	0.267	-1.90509	0.00337007	transcriptional regulatory protein EmbR
MMARE11_20030	0.267	-1.90509	0.00337116	catalase
MMARE11_23820	0.268667	-1.89611	0.00338484	MMARE11_23820 PE-PGRS family protein 2834572:2836242 forward MW:54523, PE_PGRS62
MMARE11_30930	0.268833	-1.89522	0.00341622	murG UDP-N-acetylglucosamine-N-acetylmuramyl-(pentapep tide) pyrophosphoryl-undecaprenol-N-acetylglucosamine transferase MurG 3727324:3728523 reverse MW:41062
MMARE11_23910	0.2701	-1.88843	0.00345291	argG argininosuccinate synthase ArgG 2852111:2853307 forward MW:43883
MMARE11_25970	0.271367	-1.88168	0.00351218	MMARE11_25970 type VII secretion EccD5 3126653:3128164 forward MW:53516
MMARE11_37190	0.272167	-1.87744	0.00352989	MMARE11_37190 conserved hypothetical membrane protein 4535253:4536716 reverse MW:51733
MMARE11_29510	0.273067	-1.87267	0.00353235	Cluster of ppm1B polyprenol-monophosphomannose synthase, Ppm1B 3524664:3525470 reverse MW:29387 (MMARE11_29510)
MMARE11_01910	0.274433	-1.86547	0.00355614	glyA2 serine hydroxymethyltransferase GlyA2 229409:230686 reverse MW:45477
MMARE11_21740	0.275333	-1.86075	0.00359154	zwf2 glucose-6-phosphate 1-dehydrogenase Zwf2 2571331:2572884 reverse MW:57672
MMARE11_23570	0.275633	-1.85918	0.00360817	coaE dephospho-CoA kinase CoaE 2801418:2802644 forward MW:44546
MMARE11_40010	0.277033	-1.85187	0.00363262	deaD cold-shock DEAD-Box protein, DeaD 4864227:4865942 reverse MW:62612
MMARE11_32370	0.277567	-1.84909	0.00372789	fabD malonyl CoA-acyl carrier protein transacylase FabD 3949882:3950790 forward MW:31056
MMARE11_04590	0.278033	-1.84667	0.00375283	MMARE11_04590 conserved membrane protein 544764:545615 reverse MW:30614, htdX
MMARE11_31600	0.278167	-1.84598	0.00390432	pepB leucyl aminopeptidase PepB 3802226:3803785 forward MW:53490
MMARE11_26380	0.2789	-1.84218	0.00396159	guaB1 inosine-5-monophosphate dehydrogenase GuaB1 3181590:3183026 reverse MW:49824
MMARE11_15730	0.280733	-1.83273	0.0040282	serB2 phosphoserine phosphatase SerB2 1878984:1880219 forward MW:43480
MMARE11_40560	0.282767	-1.82232	0.00407	fadD36 fatty-acid-CoA synthetase, FadD36 4931852:4933270 reverse MW:49811
MMARE11_07940	0.285467	-1.80861	0.00420758	hemD uroporphyrin-III C-methyltransferase HemD 953348:955024 forward MW:58153
MMARE11_46760	0.286067	-1.80558	0.00421033	cysA2 thiosulfate sulfurtransferase, CysA2 5615742:5616584 forward MW:30899
MMARE11_00060	0.288567	-1.79302	0.00427091	gyrA DNA gyrase (subunit A) GyrA 7348:9867 forward MW:92758
MMARE11_32400	0.272267	-1.87691	0.00447673	kasB 3-oxoacyl-[acyl-carrier protein] synthase 2 KasB 3952539:3953792 forward MW:44192
MMARE11_10970	0.296767	-1.7526	0.00449703	guaB3 inosine-5-monophosphate (imp) dehydrogenase, GuaB3 1311970:1313097 forward MW:39044
MMARE11_52740	0.2985	-1.7442	0.0046674	Cluster of MMARE11_52740 PPE family protein 6286579:6287682 forward MW:37165 (MMARE11_52740), PPE68
MMARE11_04870	0.2985	-1.7442	0.00472193	fadE6 acyl-CoA dehydrogenase FadE6 576285:578471 reverse MW:78166
MMARE11_31580	0.2985	-1.7442	0.00478207	gcvT aminomethyltransferase GcvT 3799921:3801024 reverse MW:38576
MMARE11_33840	0.3003	-1.73552	0.00493852	MMARE11_33840 haloalkane dehalogenase 4114367:4115260 forward MW:32818
MMARE11_27420	0.301	-1.73216	0.00500087	aceAb isocitrate lyase AceAb 3284601:3286889 forward MW:85239
MMARE11_16860	0.302167	-1.72658	0.00511734	MMARE11_16860 methyltransferase 2011413:2012225 forward MW:30484
MMARE11_21770	0.3032	-1.72166	0.0051616	ctaB cytochrome C oxidase assembly factor CtaB 2576408:2577382 forward MW:34703
MMARE11_36380	0.3049	-1.71359	0.00516164	MMARE11_36380 conserved hypothetical protein 4423512:4424489 reverse MW:36329
MMARE11_09650	0.305433	-1.71107	0.00517695	fusA1 elongation factor G, FusA1 1182447:1184552 forward MW:76876
MMARE11_39910	0.305767	-1.7095	0.00535081	MMARE11_39910 oxidoreductase 4852273:4853409 reverse MW:41808
MMARE11_17680	0.306167	-1.70761	0.00539928	ispG 4-hydroxy-3-methylbut-2-en-1-yl diphosphate synthase, IspG 2124024:2125187 forward MW:40596
MMARE11_21400	0.3062	-1.70745	0.00544094	ribG bifunctional riboflavin biosynthesis protein RibG 2530530:2531549 forward MW:35299
MMARE11_11080	0.3087	-1.69572	0.00547718	guaA GMP synthase, GuaA 1325284:1326861 forward MW:56168
MMARE11_21950	0.310633	-1.68672	0.00552937	fadE15 acyl-CoA dehydrogenase FadE15 2598833:2600662 reverse MW:65827
MMARE11_42100	0.310667	-1.68656	0.00567024	cbs cystathionine beta-synthase Cbs 5105834:5107228 reverse MW:48602
MMARE11_34380	0.310967	-1.68517	0.00581657	htpG chaperone protein HtpG 4169839:4171785 reverse MW:72810
MMARE11_13980	0.3128	-1.67669	0.005845	fadB4 NADPH quinone oxidoreductase FadB4 1678017:1678988 reverse MW:33304
MMARE11_09470	0.313033	-1.67561	0.00592135	rpoC DNA-directed RNA polymerase, beta chain, RpoC 1161509:1165459 forward MW:146732
MMARE11_26490	0.315333	-1.66505	0.00596476	ndh NADH dehydrogenase Ndh 3191316:3192701 reverse MW:49687
MMARE11_13200	0.3172	-1.65654	0.00604976	MMARE11_13200 conserved hypothetical protein 1587879:1588733 forward MW:30952
MMARE11_51940	0.317367	-1.65578	0.00605561	glf UDP-galactopyranose mutase Glf 6203190:6204398 reverse MW:45992
MMARE11_27350	0.317833	-1.65366	0.00605592	fadB5 oxidoreductase FadB5 3280338:3281342 reverse MW:35348
MMARE11_04850	0.318367	-1.65124	0.00612528	fadD2 fatty-acid-CoA ligase FadD2 572583:574256 forward MW:60260
MMARE11_39790	0.320067	-1.64356	0.00623305	pknH_1 transmembrane serine/threonine-protein kinase H, PknH_1 4837885:4839738 forward MW:65870
MMARE11_50440	0.3207	-1.6407	0.00626205	asd aspartate-semialdehyde dehydrogenase Asd 6015350:6016408 reverse MW:36903
MMARE11_42910	0.321	-1.63935	0.00626913	ispE 4-diphosphocytidyl-2-C-methyl-D-erythritol kinase IspE 5201427:5202350 reverse MW:31626
MMARE11_22530	0.321767	-1.63591	0.00635987	MMARE11_22530 conserved putative aldolase 2663434:2664234 reverse MW:29466
MMARE11_10960	0.3243	-1.6246	0.00641272	guaB2 inosine-5-monophosphate (imp) dehydrogenase, GuaB2 1310362:1311960 forward MW:55380
MMARE11_47180	0.324367	-1.6243	0.00642753	ptrB protease II (oligopeptidase B), PtrB 5656063:5658180 reverse MW:79081
MMARE11_47880	0.3259	-1.6175	0.00644115	otsA alpha, alpha-trehalose-phosphate synthase [UDP-forming] OtsA 5735995:5737497 forward MW:56114
MMARE11_23170	0.325933	-1.61735	0.00652666	MMARE11_23170 conserved hypothetical protein 2753477:2753887 reverse MW:15115
MMARE11_22550	0.326333	-1.61558	0.0065612	wcaA glycosyltransferase, WcaA 2666220:2667176 reverse MW:35027
MMARE11_36780	0.326433	-1.61514	0.00657197	folC folylpolyglutamate synthase protein FolC 4478434:4479888 reverse MW:50562
MMARE11_19240	0.3268	-1.61352	0.00682702	sthA soluble pyridine nucleotide transhydrogenase SthA 2297035:2298450 reverse MW:50929
MMARE11_36860	0.326933	-1.61293	0.00686559	porA pyruvate:ferredoxin oxidoreductase, PorA, alpha subunit 4489071:4491032 reverse MW:69155
MMARE11_50920	0.327167	-1.6119	0.00691403	fadD15_1 long-chain-fatty-acid-CoA ligase FadD15_1 6070777:6072579 reverse MW:64391
MMARE11_11450	0.328	-1.60823	0.00693442	metC O-acetylhomoserine sulfhydrylase MetC 1379319:1380668 reverse MW:47398
MMARE11_12300	0.281667	-1.82794	0.00697436	fadE25 acyl-CoA dehydrogenase FadE25 1486442:1487611 forward MW:41495
MMARE11_09260	0.328267	-1.60706	0.00700196	mmaA4 methoxy mycolic acid synthase 4, MmaA4 1132967:1133866 reverse MW:34420
MMARE11_36850	0.330367	-1.59786	0.00704341	porB pyruvate:ferredoxin oxidoreductase PorB, beta subunit 4487931:4489022 reverse MW:38960
MMARE11_13130	0.330433	-1.59757	0.00705818	rhlE ATP-dependent RNA helicase RhlE 1580798:1582351 reverse MW:55447
MMARE11_22110	0.330733	-1.59626	0.00707364	fabG1 3-oxoacyl-[acyl-carrier protein] reductase, FabG1 2617938:2618705 forward MW:26637
MMARE11_51850	0.3312	-1.59423	0.00729784	pks13 polyketide synthase Pks13 6186568:6191916 reverse MW:191030
MMARE11_16490	0.3315	-1.59292	0.00737138	ppk polyphosphate kinase Ppk 1961556:1963772 reverse MW:82209
MMARE11_51330	0.333	-1.58641	0.00744351	hydrolase
MMARE11_47520	0.333233	-1.5854	0.00745638	phoP two-component system response phosphate regulon transcriptional regulator, PhoP 5694861:5695583 reverse MW:26668
MMARE11_22120	0.333333	-1.58496	0.00757912	inhA enoyl-[acyl-carrier-protein] reductase, InhA 2618784:2619593 forward MW:28693
MMARE11_25990	0.333333	-1.58496	0.00758753	MMARE11_25990 type VII secretion EccE5 3129881:3131092 forward MW:43961
MMARE11_43430	0.335033	-1.57762	0.00766884	mprA mycobacterial persistence regulator MprA 5259884:5260582 reverse MW:26025
MMARE11_22040	0.336	-1.57347	0.00777431	acn aconitate hydratase Acn 2608437:2611238 reverse MW:101156
MMARE11_13670	0.336667	-1.57061	0.00777522	MMARE11_13670 PPE family protein 1642842:1644740 forward MW:60967
MMARE11_16380	0.336733	-1.57032	0.00800309	gltS glutamyl-tRNA synthetase GltS 1947946:1949415 forward MW:53671
MMARE11_25960	0.337733	-1.56604	0.00802601	MMARE11_25960 type VII secretion chaperone EspG5 3125465:3126367 forward MW:32352
MMARE11_43700	0.338333	-1.56348	0.00812533	pgi glucose-6-phosphate isomerase Pgi 5293383:5295047 forward MW:60311
MMARE11_18530	0.338533	-1.56263	0.00816119	gpsI bifunctional protein polyribonucleotide nucleotidyltransferase GpsI 2221844:2224132 forward MW:80621
MMARE11_36790	0.339533	-1.55837	0.0081951	valS valyl-tRNA synthetase protein ValS 4479885:4482545 reverse MW:98256
MMARE11_28240	0.340933	-1.55244	0.00819569	MMARE11_28240 conserved hypothetical NADP-dependent oxidoreductase 3373183:3374196 reverse MW:35369
MMARE11_28540	0.346	-1.53116	0.00850037	MMARE11_28540 PE-PGRS family protein 3402557:3404218 forward MW:53368
MMARE11_17310	0.3472	-1.52616	0.00857405	rplS 50S ribosomal protein L19 RplS 2087378:2087719 forward MW:12960
MMARE11_16310	0.347267	-1.52588	0.00858681	ilvC ketol-acid reductoisomerase IlvC 1939862:1940893 forward MW:36983
MMARE11_41320	0.347467	-1.52505	0.00874746	fadA6_3 acetyl-CoA acetyltransferase FadA6_3 5021109:5022257 reverse MW:39904
MMARE11_09460	0.347833	-1.52353	0.00879545	rpoB DNA-directed RNA polymerase, beta subunit, RpoB 1157926:1161456 forward MW:129531
MMARE11_04600	0.348633	-1.52022	0.00880827	fabG4 3-oxoacyl-[acyl-carrier protein] reductase FabG4 545634:546998 reverse MW:46768
MMARE11_09190	0.349033	-1.51856	0.00884324	MMARE11_09190 conserved protein 1127462:1127962 forward MW:18692
MMARE11_23180	0.349333	-1.51732	0.00898976	hisD histidinol dehydrogenase HisD 2753972:2755315 forward MW:46287
MMARE11_16840	0.349633	-1.51609	0.00901821	fadD28 fatty acyl-AMP ligase FadD28 2009255:2010997 reverse MW:62400
MMARE11_49600	0.3505	-1.51251	0.00909212	topA DNA topoisomerase I TopA 5928142:5930946 reverse MW:102158
MMARE11_31220	0.350567	-1.51224	0.0091281	aroG 3-deoxy-D-arabino-heptulosonate 7-phosphate synthase AroG 3762994:3764382 reverse MW:50609
MMARE11_43060	0.3531	-1.50185	0.0091482	arcA arginine deiminase ArcA 5220898:5222106 reverse MW:43395
MMARE11_16340	0.353567	-1.49995	0.00915142	serA1 D-3-phosphoglycerate dehydrogenase SerA1 1943040:1944626 forward MW:54206
MMARE11_39140	0.354267	-1.49709	0.00928635	lysA diaminopimelate decarboxylase LysA 4764989:4766407 reverse MW:50468
MMARE11_12780	0.354433	-1.49641	0.00938929	pvdS transcriptional regulatory protein PvdS 1545074:1545946 forward MW:33688
MMARE11_46640	0.356	-1.49005	0.00946509	desA1 acyl-[acyl-carrier protein] desaturase DesA1 5602653:5603669 forward MW:38991
MMARE11_22880	0.357133	-1.48547	0.00949358	MMARE11_22880 fatty acyl-CoA reductase 2717370:2718386 forward MW:36335
MMARE11_00610	0.357667	-1.48331	0.009527	MMARE11_00610 transcriptional regulatory protein (probably GntR-family) 62159:62923 reverse MW:28509
MMARE11_12650	0.3586	-1.47955	0.00955151	mtrA two-component sensory transduction transcriptional regulatory protein MtrA 1527247:1527924 forward MW:24918
MMARE11_14430	0.360733	-1.471	0.00958871	ftsE cell division ATP-binding protein FtsE 1723899:1724588 forward MW:25509
MMARE11_07450	0.365	-1.45403	0.00961629	pcaA mycolic acid synthase PcaA 899335:900198 reverse MW:32751
MMARE11_18480	0.365767	-1.451	0.00972155	sirR transcriptional repressor SirR 2218253:2218945 reverse MW:25159
MMARE11_40070	0.366367	-1.44864	0.00976952	MMARE11_40070 short-chain type dehydrogenase/reductase 4877260:4878093 forward MW:29090
MMARE11_15350	0.367	-1.44615	0.00995292	UDP-glucose 4-epimerase GalE1
MMARE11_25040	0.367	-1.44615	0.010062	transcriptional accessory protein Tex
MMARE11_31610	0.367	-1.44615	0.0100729	ephD short-chain dehydrogenase EphD 3804248:3806032 reverse MW:63845
MMARE11_41940	0.367	-1.44615	0.0101552	desA2 acyl-[acyl-carrier protein] desaturase DesA2 5089373:5090200 reverse MW:31348
MMARE11_03280	0.367	-1.44615	0.0101705	MMARE11_03280 O-Methyltransferase 382342:383277 forward MW:34076
MMARE11_50610	0.367	-1.44615	0.0102145	dnaZX DNA polymerase III (subunit gamma/tau) DnaZX 6035547:6037412 reverse MW:66400
MMARE11_19130	0.3676	-1.44379	0.0102606	fadE20 acyl-CoA dehydrogenase FadE20 2285445:2286605 forward MW:43067
MMARE11_13100	0.368133	-1.4417	0.0103983	gpm2 phosphoglycerate mutase Gpm2 1578070:1579455 reverse MW:48595
MMARE11_21200	0.3688	-1.43909	0.0104243	carA carbamoyl-phosphate synthase small chain CarA 2507088:2508215 forward MW:39797
MMARE11_14560	0.3704	-1.43284	0.0104397	MMARE11_14560 conserved hypothetical protein 1737030:1737896 reverse MW:31108
MMARE11_23900	0.3716	-1.42818	0.0104671	argR arginine repressor ArgR 2851562:2852062 forward MW:16872
MMARE11_43140	0.3716	-1.42818	0.0104765	MMARE11_43140 conserved hypothetical protein 5227456:5227992 forward MW:18418
MMARE11_13800	0.372	-1.42663	0.0104907	nuoD NADH dehydrogenase I (chain D) NuoD (NADH-ubiquinone oxidoreductase chain D) 1660079:1661377 reverse MW:47503
MMARE11_29630	0.373133	-1.42224	0.0105093	MMARE11_29630 short-chain dehydrogenase 3541158:3541985 forward MW:28835
MMARE11_16770	0.373167	-1.42211	0.0105149	MMARE11_16770 ketoreductase 1992016:1993173 forward MW:41858
MMARE11_18160	0.373367	-1.42133	0.010561	proS prolyl-tRNA synthetase ProS 2184108:2185856 forward MW:63537
MMARE11_09660	0.374067	-1.41863	0.0105698	tuf iron-regulated elongation factor Ef-tu, Tuf 1184739:1185929 forward MW:43774
MMARE11_45030	0.340667	-1.55357	0.010595	fadA acyl-CoA thiolase FadA 5438954:5440207 reverse MW:43984
MMARE11_00050	0.374867	-1.41555	0.0106263	gyrB DNA gyrase (subunit B) GyrB 5230:7308 forward MW:76113
MMARE11_21760	0.375867	-1.41171	0.0108111	tkt transketolase Tkt 2574018:2576120 reverse MW:75125
MMARE11_10270	0.375933	-1.41145	0.0108178	secY preprotein translocase, SecY 1239948:1241273 forward MW:47656
MMARE11_48140	0.3775	-1.40545	0.0108232	MMARE11_48140 conserved hypothetical protein 5778361:5779071 forward MW:25669
MMARE11_37690	0.281333	-1.82965	0.0108669	fas fatty acid synthase Fas 4587456:4596674 reverse MW:326065
MMARE11_10130	0.379333	-1.39846	0.0109978	ssp protease iv, Ssp 1225422:1227224 forward MW:63667
MMARE11_10870	0.3801	-1.39555	0.0109992	MMARE11_10870 PPE family protein 1300305:1302020 reverse MW:55869
MMARE11_20860	0.3803	-1.39479	0.0110064	MMARE11_20860 conserved hypothetical alanine and leucine rich protein 2467690:2470365 reverse MW:96443
MMARE11_00640	0.3805	-1.39403	0.0110456	ino1 myo-inositol-1-phosphate synthase Ino1 64868:65986 reverse MW:40366
MMARE11_16930	0.302667	-1.7242	0.0110571	ppsD phenolpthiocerol synthesis type-I polyketide synthase PpsD 2027732:2033152 reverse MW:191722
MMARE11_31570	0.381433	-1.3905	0.011138	ilvE branched-chain amino acid transaminase IlvE 3798760:3799866 reverse MW:39809
MMARE11_14220	0.3853	-1.37595	0.0112314	fadE23 acyl-CoA dehydrogenase FadE23 1700990:1702195 reverse MW:43508
MMARE11_38840	0.387233	-1.36872	0.0112999	fadA4 acetyl-CoA acetyltransferase FadA4 4722729:4723910 reverse MW:40490
MMARE11_50450	0.387333	-1.36835	0.0113038	ask aspartate kinase Ask 6016410:6017675 reverse MW:44426
MMARE11_04150	0.3875	-1.36773	0.0113351	pckA iron-regulated phosphoenolpyruvate carboxykinase [GTP] PckA 484316:486145 forward MW:67848
MMARE11_26340	0.389267	-1.36117	0.0114545	glcB malate synthase G GlcB 3174696:3176891 reverse MW:79477
MMARE11_04680	0.3912	-1.35402	0.0115135	sdhA_1 succinate dehydrogenase (iron-sulfur subunit), SdhA_1 554338:556266 reverse MW:70474
MMARE11_23430	0.391267	-1.35378	0.0115909	pykA pyruvate kinase PykA 2782256:2783674 forward MW:50721
MMARE11_40240	0.3913	-1.35365	0.0117074	mrp Mrp-related protein Mrp 4895681:4896841 forward MW:40717
MMARE11_09920	0.393467	-1.34569	0.0117148	rpsC 30S ribosomal protein S3, RpsC 1210835:1211662 forward MW:30177
MMARE11_19640	0.3936	-1.3452	0.0117609	MMARE11_19640 conserved hypothetical protein 2338596:2339291 forward MW:26448
MMARE11_12190	0.396	-1.33643	0.0118001	accA3 bifunctional protein acetyl-/propionyl-coenzyme A carboxylase alpha chain AccA3 1476535:1478328 reverse MW:63706
MMARE11_12610	0.396233	-1.33558	0.0119171	sahH adenosylhomocysteinase SahH 1520253:1521731 forward MW:53885
MMARE11_09430	0.3984	-1.32771	0.0120171	MMARE11_09430 transcriptional regulatory protein 1153857:1154594 reverse MW:25795
MMARE11_26190	0.3986	-1.32699	0.0120451	secA2 preprotein translocase ATPase SecA2 3156670:3159090 forward MW:87910
MMARE11_22080	0.399967	-1.32205	0.0122152	moxR1 transcriptional regulatory protein, MoxR1 2614695:2615810 forward MW:40012
MMARE11_10660	0.4	-1.32193	0.0122749	phosphoglucosamine mutase
MMARE11_20840	0.4056	-1.30187	0.0124517	MMARE11_20840 conserved hypothetical protein 2465609:2466619 forward MW:36987
MMARE11_50640	0.406967	-1.29702	0.0124772	echA3_1 enoyl-CoA hydratase, EchA3_1 6040055:6040801 reverse MW:25942
MMARE11_17470	0.407733	-1.2943	0.0126704	tsf elongation factor Tsf 2101960:2102775 forward MW:28531
MMARE11_38260	0.407967	-1.29348	0.0126739	MMARE11_38260 transcriptional regulatory protein 4661212:4662015 forward MW:29489
MMARE11p_00470	0.4083	-1.2923	0.0128983	MMARE11p_00470 Flp pilus assembly protein, ATPase CpaE 87618:88322 forward MW:25598
MMARE11_12410	0.4097	-1.28736	0.0129031	rmlD dTDP-6-deoxy-L-lyxo-4-hexulose reductase RmlD 1500234:1501160 forward MW:31460
MMARE11_21520	0.410333	-1.28513	0.0130667	whiA transcriptional regulatory protein WhiA 2543041:2544018 forward MW:34864
MMARE11_36910	0.411733	-1.28022	0.0133187	clpP1 ATP-dependent CLP protease proteolytic subunit 1 ClpP1 4496961:4497557 reverse MW:21488
MMARE11_06580	0.412033	-1.27917	0.0133609	fgd1 F420-dependent glucose-6-phosphate dehydrogenase Fgd1 798925:799935 forward MW:37232
MMARE11_18220	0.412633	-1.27707	0.0133795	infB translation initiation factor IF-2 InfB 2189213:2192062 forward MW:98306
MMARE11_43750	0.4152	-1.26812	0.0133873	MMARE11_43750 PE-PGRS family protein 5299861:5301576 reverse MW:49339
MMARE11_09450	0.415567	-1.26685	0.0134521	mkl ribonucleotide-transport ATP-binding protein ABC transporter, Mkl 1156347:1157333 forward MW:35897
MMARE11_42830	0.416733	-1.2628	0.0134984	prsA ribose-phosphate pyrophosphokinase PrsA 5192192:5193172 forward MW:35475
MMARE11_38990	0.417333	-1.26073	0.0136387	atpA ATP synthase alpha chain AtpA 4749602:4751251 reverse MW:59372
MMARE11_10760	0.42	-1.25154	0.0136777	gadB glutamate decarboxylase, GadB 1289417:1290802 forward MW:51032
MMARE11_22890	0.420067	-1.25131	0.0138279	MMARE11_22890 ketoacyl reductase 2718391:2719194 forward MW:28215
MMARE11_36390	0.4206	-1.24948	0.0138832	MMARE11_36390 conserved hypothetical protein 4424489:4426153 reverse MW:61855
MMARE11_35900	0.421567	-1.24617	0.0139287	dnaJ2 chaperone protein DnaJ2 4358251:4359387 reverse MW:39993
MMARE11_03930	0.4227	-1.24229	0.0141677	bglS beta-glucosidase BglS 452489:454624 forward MW:74871
MMARE11_09860	0.425333	-1.23333	0.0142574	rplC 50S ribosomal protein L3 RplC 1207477:1208130 forward MW:23036
MMARE11_23560	0.4257	-1.23209	0.0143177	rpsA ribosomal protein S1 RpsA 2799960:2801405 forward MW:53105
MMARE11_10060	0.425967	-1.23119	0.0143488	rpsH 30S ribosomal protein S8, RpsH 1221618:1222016 forward MW:14392
MMARE11_05980	0.428667	-1.22207	0.0143581	MMARE11_05980 ketoacyl reductase 728923:729696 forward MW:26898
MMARE11_23790	0.4287	-1.22196	0.0143756	pheS phenylalanyl-tRNA synthetase, alpha chain PheS 2828540:2829583 forward MW:38196
MMARE11_52270	0.4307	-1.21524	0.0144881	ethR transcriptional regulatory repressor protein (TetR-family) EthR 6233821:6234471 forward MW:23673
MMARE11_52830	0.430767	-1.21502	0.0145239	espB Esx-1 secreted protein, EspB 6298108:6299472 reverse MW:46927
MMARE11_19350	0.430867	-1.21469	0.0146448	Cluster of sigA RNA polymerase sigma factor SigA 2306700:2308205 reverse MW:54730 (MMARE11_19350)
MMARE11_14450	0.431367	-1.21301	0.014732	smpB ssRNA-binding protein SmpB 1725485:1725991 forward MW:19037
MMARE11_12100	0.4325	-1.20923	0.0147512	MMARE11_12100 transcriptional regulatory protein (probably AsnC-family) 1461332:1461784 forward MW:16379
MMARE11_29690	0.433	-1.20756	0.0147887	bifunctional cobalamin adenosyltransferase CobI/precorrin-3B C(17)-methyltransferase CobJ
MMARE11_09220	0.433	-1.20756	0.0148078	rplK 50S ribosomal protein L11, RplK 1129613:1130041 forward MW:14960
MMARE11_10090	0.433	-1.20756	0.0148187	rpsE 30S ribosomal protein S5, RpsE 1223014:1223688 forward MW:22935
MMARE11_17420	0.433	-1.20756	0.0148406	viuB mycobactin utilization protein ViuB 2097323:2098171 forward MW:30514
MMARE11_42150	0.433	-1.20756	0.0148717	echA9 enoyl-CoA hydratase EchA9 5112140:5113177 forward MW:36144
MMARE11_12370	0.434	-1.20423	0.0148764	ctpC metal cation-transporting p-type ATPase C CtpC 1495397:1497595 reverse MW:77820
MMARE11_09560	0.434633	-1.20213	0.0149205	echA5 enoyl-CoA hydratase, EchA5 1174451:1175224 forward MW:26715
MMARE11_32510	0.434767	-1.20169	0.015049	adhE2 zinc-dependent alcohol dehydrogenase AdhE2 3964381:3965466 forward MW:37892
MMARE11_13000	0.434867	-1.20135	0.0151833	MMARE11_13000 iron-regulated short-chain dehydrogenase/reductase 1570177:1571025 reverse MW:29929
MMARE11_26510	0.435967	-1.19771	0.0151936	MMARE11_26510 oxidoreductase 3193839:3194516 reverse MW:23290
MMARE11_21900	0.4386	-1.18902	0.0152268	MMARE11_21900 conserved ATP-binding protein ABC transporter 2594296:2595078 forward MW:28026
MMARE11_12240	0.4401	-1.1841	0.0152849	accD5 propionyl-CoA carboxylase beta chain 5 AccD5 1480755:1482395 reverse MW:58940
MMARE11_22580	0.440833	-1.18169	0.0153928	galE6 UDP-glucose 4-epimerase, GalE6 2669473:2670489 forward MW:36544
MMARE11_05950	0.4412	-1.1805	0.0154018	clpB endopeptidase ATP binding protein (chain B) ClpB 724292:726838 forward MW:92748
MMARE11_22570	0.441867	-1.17832	0.0154368	MMARE11_22570 predicted pyridoxal phosphate-dependent enzyme 2668127:2669470 forward MW:49185
MMARE11_18310	0.442533	-1.17614	0.0154617	echA16_2 enoyl-CoA hydratase, EchA16_2 2200159:2200908 reverse MW:26517
MMARE11_32460	0.443433	-1.17321	0.0155324	MMARE11_32460 conserved hypothetical protein 3960074:3961036 forward MW:34146
MMARE11_07480	0.4445	-1.16974	0.0155424	MMARE11_07480 transcriptional regulatory protein 902620:903036 forward MW:15134
MMARE11_10840	0.445033	-1.16801	0.0157243	groEL1 60 kDa chaperone (GroEL1) 1296465:1298084 forward MW:55858
MMARE11_41460	0.445033	-1.16801	0.0157313	metE 5-methyltetrahydropteroyltriglutamate--homocystei ne methyltransferase MetE 5041056:5043347 forward MW:82015
MMARE11_00570	0.445267	-1.16726	0.0157954	MMARE11_00570 short-chain type oxidoreductase 58296:58961 reverse MW:23286
MMARE11_06420	0.4454	-1.16683	0.0158427	panD_1 aspartate decarboxylase, PanD_1 773950:774438 reverse MW:18290
MMARE11_16290	0.445967	-1.16499	0.0158614	ilvB1 acetolactate synthase (large subunit) IlvB1 1937454:1939310 forward MW:66049
MMARE11_16060	0.447767	-1.15918	0.0159971	fixB electron transfer flavoprotein (alpha-subunit) FixB 1912746:1913702 forward MW:31747
MMARE11_00710	0.4484	-1.15714	0.0161396	rpsF 30S ribosomal protein S6 RpsF 73090:73380 forward MW:10896
MMARE11_20310	0.448733	-1.15607	0.0161858	thrS threonyl-tRNA synthetase ThrS 2403762:2405837 forward MW:77212
MMARE11_12700	0.450533	-1.15029	0.0162385	MMARE11_12700 conserved protein 1533342:1534031 forward MW:26182
MMARE11_21390	0.450533	-1.15029	0.0163239	rpe ribulose-phosphate 3-epimerase Rpe 2529833:2530522 forward MW:24004
MMARE11_39130	0.451133	-1.14837	0.016361	thrA homoserine dehydrogenase ThrA 4763660:4764985 reverse MW:45723
MMARE11_41870	0.455167	-1.13553	0.0163709	glpX fructose 1,6-bisphosphatase GlpX 5081646:5082734 forward MW:37799
MMARE11_39100	0.400517	-1.32007	0.0163733	rho transcription termination factor Rho 4759449:4761314 reverse MW:66876
MMARE11_36600	0.455333	-1.13501	0.0164032	proA gamma-glutamyl phosphate reductase protein ProA 4448017:4449288 reverse MW:44511
MMARE11_46370	0.41155	-1.28086	0.0165049	crtB phytoene synthase, CrtB 5573644:5574603 forward MW:35453
MMARE11_09230	0.4555	-1.13448	0.0165192	rplA 50S ribosomal protein L1, RplA 1130129:1130836 forward MW:24787
MMARE11_10080	0.456267	-1.13205	0.0165775	rplR 50S ribosomal protein L18, RplR 1222569:1222976 forward MW:14593
MMARE11_31620	0.4568	-1.13037	0.0167653	sucB pyruvate dehydrogenase (E2 component) SucB 3806261:3808045 forward MW:61264
MMARE11_10070	0.4578	-1.12721	0.0168135	rplF 50S ribosomal protein L6, RplF 1222027:1222566 forward MW:19457
MMARE11_42700	0.458	-1.12658	0.0168691	trcR two-component transcriptional regulator TrcR 5176481:5177245 forward MW:28654
MMARE11_18760	0.4598	-1.12092	0.0169455	MMARE11_18760 short-chain type dehydrogenase/reductase 2247919:2248701 forward MW:26897
MMARE11_33990	0.460067	-1.12009	0.0169709	MMARE11_33990 conserved hypothetical protein 4130263:4131243 reverse MW:35237
MMARE11_09690	0.460267	-1.11946	0.0170302	MMARE11_09690 ferredoxin reductase 1187880:1189118 forward MW:43606
MMARE11_00020	0.460533	-1.11862	0.0170717	dnaN DNA polymerase III (beta chain) DnaN 2074:3282 forward MW:42313
MMARE11_37020	0.461167	-1.11664	0.0171726	MMARE11_37020 conserved hypothetical protein 4510009:4510251 reverse MW:8441
MMARE11_52680	0.4613	-1.11622	0.017212	MMARE11_52680 Esx-1 secretion associated protein EspH 6278309:6278866 forward MW:19945
MMARE11_01360	0.4636	-1.10905	0.0173665	fadE25_2 acyl-CoA dehydrogenase FadE25_2 170025:171236 reverse MW:43736
MMARE11_49490	0.463967	-1.10791	0.0174401	dacB1 D-alanyl-D-alanine carboxypeptidase DacB1 5914433:5915818 reverse MW:46874
MMARE11_37180	0.464167	-1.10729	0.0174515	plsC bifunctional transmembrane phospholipid biosynthesis enzyme PlsC 4533307:4535256 reverse MW:69245
MMARE11_36450	0.465033	-1.10459	0.0177319	fadE18_2 acyl-CoA dehydrogenase FadE18_2 4431505:4432623 forward MW:39902
MMARE11_52360	0.465533	-1.10304	0.0177566	gltD NADH-dependent glutamate synthase (small subunit) GltD 6240914:6242380 reverse MW:53159
MMARE11_38970	0.4657	-1.10253	0.0177834	atpD ATP synthase beta chain AtpD 4747189:4748640 reverse MW:52687
MMARE11_41570	0.4657	-1.10253	0.0179153	gnd2 6-phosphogluconate dehydrogenase, decarboxylating Gnd2 5052843:5053865 reverse MW:36181
MMARE11_29030	0.4657	-1.10253	0.0180402	fabG3_1 20-beta-hydroxysteroid dehydrogenase FabG3_1 3466988:3467770 forward MW:27101
MMARE11_31810	0.466767	-1.09923	0.018061	MMARE11_31810 conserved hypothetical protein 3875121:3875960 forward MW:29828
MMARE11_05050	0.467	-1.09851	0.0180747	hypothetical protein
MMARE11_33180	0.467	-1.09851	0.0180749	6-phosphofructokinase
MMARE11_47220	0.467	-1.09851	0.0180749	MMARE11_47220 aldehyde dehydrogenase 5660858:5662381 reverse MW:54903
MMARE11_52640	0.417	-1.26188	0.0181963	MMARE11_52640 conserved hypothetical regulatory protein 6274415:6275527 forward MW:39220
MMARE11_02810	0.467	-1.09851	0.0182161	MMARE11_02810 conserved hypothetical protein 332231:333451 forward MW:43206
MMARE11_01450	0.467	-1.09851	0.0182704	icd2 isocitrate dehydrogenase [NADP] Icd2 179233:181470 reverse MW:82351
MMARE11_43620	0.467	-1.09851	0.0182787	sucD succinyl-CoA synthetase (alpha chain) SucD 5283115:5284017 reverse MW:30781
MMARE11_33890	0.467	-1.09851	0.0183026	MMARE11_33890 conserved hypothetical membrane protein 4119946:4120842 reverse MW:31780
MMARE11_32390	0.411	-1.28279	0.0183383	kasA 3-oxoacyl-[acyl-carrier protein] synthase 1 KasA 3951207:3952457 forward MW:43619
MMARE11_18150	0.467	-1.09851	0.0183426	efpA integral membrane efflux protein EfpA 2182410:2184002 forward MW:55510
MMARE11_43630	0.467	-1.09851	0.0183634	sucC succinyl-CoA synthetase (beta chain) SucC 5284032:5285195 reverse MW:40820
MMARE11_16810	0.427	-1.22769	0.0185414	Cluster of pks15/1 polyketide synthase Pks15/1 1998757:2005071 forward MW:217767 (MMARE11_16810)
MMARE11_16920	0.417	-1.26188	0.0186448	ppsE phenolpthiocerol synthesis type-I polyketide synthase PpsE 2023281:2027726 reverse MW:157950
MMARE11_52810	0.467	-1.09851	0.0187065	MMARE11_52810 Esx-1 secretion associated protein EspK 6294977:6297316 reverse MW:79476
MMARE11_15890	0.467	-1.09851	0.0187367	MMARE11_15890 transferase 1895204:1895941 forward MW:27495
MMARE11_36740	0.467	-1.09851	0.0188515	rplU 50S ribosomal protein L21 RplU 4473622:4473933 reverse MW:11001
MMARE11_13810	0.467	-1.09851	0.0188677	nuoC NADH dehydrogenase I (chain C) NuoC (NADH-ubiquinone oxidoreductase chain C) 1661397:1662113 reverse MW:26987
MMARE11_32410	0.4157	-1.26639	0.0188838	accD6 acetyl/propionyl-CoA carboxylase (beta subunit) AccD6 3953830:3955251 forward MW:50076
MMARE11_51840	0.467	-1.09851	0.0190798	accD4_1 propionyl-CoA carboxylase beta chain 4 AccD4_1 6184988:6186568 reverse MW:56882
MMARE11_49880	0.467	-1.09851	0.0192203	MMARE11_49880 conserved regulatory protein 5957018:5957692 forward MW:24687
MMARE11_29160	0.467067	-1.0983	0.0192674	MMARE11_29160 conserved membrane protein 3479425:3480312 reverse MW:31226
MMARE11_31960	0.467067	-1.0983	0.0194778	glnA2 glutamine synthetase GlnA2 3894846:3896186 reverse MW:49745
MMARE11_36880	0.468967	-1.09244	0.0195726	clpX ATP-dependent CLP protease ATP-binding subunit ClpX 4492686:4493966 reverse MW:46829
MMARE11_09180	0.468967	-1.09244	0.0196429	MMARE11_09180 conserved protein 1127022:1127450 forward MW:15003
MMARE11_36980	0.468967	-1.09244	0.0196572	MMARE11_36980 conserved hypothetical protein 4504163:4504786 reverse MW:22764
MMARE11_35710	0.468967	-1.09244	0.0196616	PPE family protein
MMARE11_40580	0.470133	-1.08886	0.0196781	MMARE11_40580 conserved hypothetical protein 4934143:4935051 reverse MW:32410
MMARE11_14340	0.470133	-1.08886	0.01968	MMARE11_14340 conserved protein 1714961:1715389 reverse MW:15824
MMARE11_12150	0.470133	-1.08886	0.019794	rsbW anti-sigma factor RsbW 1464480:1464998 forward MW:18495
MMARE11_16050	0.401333	-1.31713	0.0198148	fixA electron transfer flavoprotein (beta-subunit) FixA 1911907:1912698 forward MW:27776
MMARE11_07590	0.470833	-1.08671	0.0198309	MMARE11_07590 short-chain type oxidoreductase 917147:917899 reverse MW:26067
MMARE11_19460	0.470833	-1.08671	0.0199132	ceoC TRK system potassium uptake protein CeoC 2315312:2315974 reverse MW:23734
MMARE11_05860	0.408333	-1.29218	0.0199958	dnaK chaperone protein DnaK 695250:697118 forward MW:66381
MMARE11_52700	0.470833	-1.08671	0.0200615	Cluster of MMARE11_52700 type VII secretion EccB1 6280595:6282040 forward MW:51287 (MMARE11_52700)
MMARE11_07790	0.471833	-1.08365	0.0201496	MMARE11_07790 conserved protein 935932:936999 forward MW:38763
MMARE11_42130	0.422	-1.24469	0.0203264	fadA3 beta-ketoacyl CoA thiolase FadA3 5109637:5110869 forward MW:42913
MMARE11_34050	0.4724	-1.08192	0.020413	MMARE11_34050 conserved hypothetical protein 4136944:4137363 forward MW:15462
MMARE11_11820	0.4724	-1.08192	0.0204627	MMARE11_11820 conserved protein 1422397:1423722 reverse MW:48460
MMARE11_09930	0.4724	-1.08192	0.0204963	rplP 50S ribosomal protein L16, RplP 1211666:1212082 forward MW:15706
MMARE11_09870	0.4724	-1.08192	0.0205644	rplD 50S ribosomal protein L4, RplD 1208130:1208804 forward MW:23832
MMARE11_44650	0.4724	-1.08192	0.0206403	gltA2 citrate synthase I GltA2 5399444:5400739 reverse MW:48186
MMARE11_36900	0.473267	-1.07927	0.0206432	clpP2 ATP-dependent CLP protease proteolytic subunit 2 ClpP2 4496329:4496964 reverse MW:23229
MMARE11_21030	0.473267	-1.07927	0.0206974	efp elongation factor P Efp 2489062:2489625 forward MW:20364
MMARE11_21610	0.473267	-1.07927	0.0210056	gap glyceraldehyde 3-phosphate dehydrogenase Gap 2555705:2556724 forward MW:35967
MMARE11_07580	0.473267	-1.07927	0.0210625	lprQ conserved lipoprotein LprQ 915775:917163 forward MW:49329
MMARE11_09880	0.4734	-1.07887	0.0210983	rplW 50S ribosomal protein L23, RplW 1208804:1209106 forward MW:10952
MMARE11_09990	0.474867	-1.07441	0.0211801	MMARE11_09990 conserved protein 1217181:1217885 forward MW:23972
MMARE11_49030	0.474867	-1.07441	0.0212228	MMARE11_49030 carbonic anhydrase 5867913:5868539 reverse MW:21741
MMARE11_51890	0.474867	-1.07441	0.0214846	fbpA secreted antigen 85-A FbpA 6196476:6197489 reverse MW:35643
MMARE11_22370	0.475733	-1.07177	0.0216368	MMARE11_22370 conserved hypothetical methyltransferase 2646682:2647554 forward MW:32281
MMARE11_01750	0.475733	-1.07177	0.021642	MMARE11_01750 PPE family protein 212503:213609 forward MW:36548
MMARE11_35721	0.432733	-1.20845	0.0216467	MMARE11_35721 PPE family protein 4338932:4340095 reverse MW:37104
MMARE11_52650	0.405733	-1.3014	0.0218127	MMARE11_52650 Esx-1 secretion associated protein EspE 6275762:6277018 forward MW:43692
MMARE11_03400	0.4759	-1.07127	0.0218863	pntAa NAD(P) transhydrogenase (subunit alpha) PntAa 398320:399408 forward MW:37267
MMARE11_03820	0.4759	-1.07127	0.0218933	MMARE11_03820 conserved Mce associated transmembrane protein 441869:442858 forward MW:36308
MMARE11_09910	0.4759	-1.07127	0.0220102	rplV 50S ribosomal protein L22, RplV 1210278:1210835 forward MW:19464
MMARE11_14960	0.477133	-1.06754	0.0222232	citE_2 citrate lyase beta subunit, CitE_2 1781614:1782549 forward MW:33404
MMARE11_04610	0.417713	-1.25941	0.0222493	fadA2 acetyl-CoA acyltransferase FadA2 547168:548493 forward MW:46419
MMARE11_23860	0.4775	-1.06643	0.022269	argJ glutamate N-acetyltransferase ArgJ 2847363:2848577 forward MW:41295
MMARE11_29520	0.4775	-1.06643	0.0225951	ppm1A polyprenol-monophosphomannose synthase, Ppm1A 3525496:3527592 reverse MW:74263
MMARE11_44680	0.4775	-1.06643	0.0226855	citA citrate synthase II CitA 5403590:5404711 forward MW:40143
MMARE11_03300	0.478633	-1.06301	0.0229099	MMARE11_03300 short-chain type dehydrogenase/reductase 384984:385844 forward MW:29785
MMARE11_21170	0.480033	-1.05879	0.0229718	pyrB aspartate carbamoyltransferase PyrB 2504322:2505284 forward MW:33882
MMARE11_09640	0.480033	-1.05879	0.0229793	rpsG 30S ribosomal protein S7, RpsG 1181896:1182366 forward MW:17600
MMARE11_36110	0.4005	-1.32013	0.0230646	desA1_1 acyl-[acyl-carrier protein] desaturase DesA1_1 4391481:4392497 reverse MW:39151
MMARE11_49940	0.4805	-1.05739	0.0232619	whiB4 transcriptional regulatory protein Whib-like WhiB4 5961544:5961894 reverse MW:12983
MMARE11_10650	0.482133	-1.0525	0.0235538	rpsI ribosomal protein S9, RpsI 1278099:1278557 forward MW:16904
MMARE11_31410	0.482133	-1.0525	0.0236353	qcrA Rieske iron-sulfur protein QcrA 3781370:3782554 forward MW:43115
MMARE11_12510	0.482133	-1.0525	0.0238989	pmmA phosphomannomutase PmmA 1509685:1511085 forward MW:48944
MMARE11_41880	0.482267	-1.0521	0.0239832	fum fumarase Fum 5082772:5084202 forward MW:50192
MMARE11_01390	0.4823	-1.052	0.0240007	MMARE11_01390 conserved protein 173319:173885 reverse MW:21608
MMARE11_27590	0.4823	-1.052	0.0240107	MMARE11_27590 immunogenic protein Mpt63 3309890:3310369 reverse MW:16435
MMARE11_51150	0.482733	-1.0507	0.0240521	MMARE11_51150 conserved hypothetical protein 6094910:6095509 reverse MW:22039
MMARE11_09210	0.482733	-1.0507	0.0242904	nusG transcription antitermination protein, NusG 1128853:1129566 forward MW:25557
MMARE11_13170	0.484033	-1.04682	0.0243844	MMARE11_13170 transcriptional regulator, TetR family 1584565:1585248 reverse MW:25044
MMARE11_05690	0.484133	-1.04652	0.0244173	MMARE11_05690 iron-sulphur-binding reductase 671701:674649 reverse MW:104116
MMARE11_16300	0.484133	-1.04652	0.024444	ilvN acetolactate synthase (small subunit) IlvN 1939310:1939819 forward MW:18285
MMARE11_16990	0.4843	-1.04603	0.0245308	tesA thioesterase TesA 2051568:2052317 reverse MW:27569
MMARE11_00960	0.4843	-1.04603	0.02461	celA cellobiohydrolase a (1,4-beta-cellobiosidase a) CelA 126613:127665 forward MW:36361
MMARE11_37640	0.484367	-1.04583	0.0247134	argE acetylornithine deacetylase ArgE 4581874:4583199 reverse MW:45998
MMARE11_21750	0.484367	-1.04583	0.0248414	tal transaldolase Tal 2572881:2574002 reverse MW:40147
MMARE11_10640	0.484367	-1.04583	0.0250394	rplM 50S ribosomal protein L13, RplM 1277659:1278102 forward MW:16217
MMARE11_05700	0.485033	-1.04384	0.0250446	iron-sulfur-binding reductase
MMARE11_39080	0.485033	-1.04384	0.0252236	prfA peptide chain release factor 1 PrfA 4757851:4758924 reverse MW:39020
MMARE11_31400	0.350333	-1.5132	0.0252404	qcrC ubiquinol-cytochrome C reductase QcrC 3780468:3781373 forward MW:31510
MMARE11_16910	0.485333	-1.04295	0.0254346	drrA daunorubicin-DIM-transport ATP-binding protein ABC transporter DrrA 2022275:2023270 reverse MW:35805
MMARE11_23220	0.485333	-1.04295	0.0256872	hisA phosphoribosylformimino-5-aminoimidazole carboxamide ribotide isomerase HisA 2757715:2758464 forward MW:26044
MMARE11_35610	0.485333	-1.04295	0.0258463	Cluster of esxN_3 EsaT-6 like protein EsxN_3 4329676:4329960 reverse MW:9939 (MMARE11_35610)
MMARE11_17350	0.4859	-1.04127	0.025916	MMARE11_17350 conserved hypothetical protein 2089847:2090632 reverse MW:27621
MMARE11_05070	0.4859	-1.04127	0.0259582	mycP3 membrane-anchored mycosin MycP3 599637:601061 forward MW:47413
MMARE11_10460	0.486933	-1.0382	0.0259708	rpsD 30S ribosomal protein S4, RpsD 1255728:1256333 forward MW:23408
MMARE11_29480	0.486933	-1.0382	0.0263235	pks12 polyketide synthase, Pks12 3510898:3523461 reverse MW:434264
MMARE11_16890	0.486967	-1.03811	0.0263319	drrC daunorubicin-DIM-transport integral membrane protein ABC transporter DrrC 2020582:2021403 reverse MW:29708
MMARE11_17460	0.489567	-1.03042	0.0263795	rpsB 30S ribosomal protein S2 RpsB 2101128:2101958 forward MW:29995
MMARE11_48620	0.489567	-1.03042	0.0267011	MMARE11_48620 PPE family protein 5827739:5829352 forward MW:52657
MMARE11_39000	0.4897	-1.03003	0.0271072	atpH ATP synthase delta chain AtpH 4751313:4752650 reverse MW:47913
MMARE11_12480	0.4897	-1.03003	0.0271585	whiB2 transcriptional regulatory protein Whib-like WhiB2 1508047:1508430 forward MW:14075
MMARE11_49350	0.490067	-1.02895	0.0273104	ftsH membrane-bound protease FtsH 5899929:5902169 reverse MW:80478
MMARE11_46400	0.490067	-1.02895	0.0275102	mmpL13_1 conserved transmembrane transport protein MmpL13_1 5575288:5577597 forward MW:81274
MMARE11_26750	0.490433	-1.02787	0.0275431	ahpD alkyl hydroperoxide reductase D protein AhpD 3221906:3222442 reverse MW:18647
MMARE11_51880	0.490433	-1.02787	0.0275472	fbpD secreted Mpt51/Mpb51 antigen protein FbpD 6195395:6196300 reverse MW:30922
MMARE11_10470	0.490833	-1.02669	0.0276022	rpoA DNA-directed RNA polymerase (alpha chain), RpoA 1256419:1257462 forward MW:37741
MMARE11_31320	0.490833	-1.02669	0.0276334	fadD15 long-chain-fatty-acid-CoA ligase FadD15 3770768:3772570 forward MW:64572
MMARE11_52660	0.4912	-1.02562	0.0276517	MMARE11_52660 Esx-1 secretion associated protein EspF 6277116:6277427 forward MW:10626
MMARE11_15680	0.491233	-1.02552	0.0277926	nrdF2 ribonucleoside-diphosphate reductase (beta chain) NrdF2 1873290:1874264 forward MW:36877
MMARE11_28350	0.4313	-1.21324	0.0278076	katG catalase-peroxidase-peroxynitritase T KatG 3383170:3385401 reverse MW:81057
MMARE11_37310	0.492833	-1.02083	0.0280548	citE citrate (pro-3s)-lyase (beta subunit) CitE 4548153:4548974 reverse MW:28988
MMARE11_35670	0.492833	-1.02083	0.02808	esxN_4 EsaT-6 like protein EsxN_4 4336141:4336425 reverse MW:9851
MMARE11_07280	0.493267	-1.01956	0.0281266	echA2 enoyl-CoA hydratase EchA2 881329:882243 reverse MW:33095
MMARE11_24450	0.493267	-1.01956	0.0281495	MMARE11_24450 PPE family protein, PPE23 2928153:2929466 reverse MW:43787
MMARE11_49220	0.494633	-1.01557	0.0282127	clpC1 ATP-dependent protease ATP-binding subunit ClpC1 5887399:5889945 reverse MW:93735
MMARE11_31800	0.494833	-1.01499	0.0282603	wrbA multimeric flavodoxin WrbA 3874336:3875088 forward MW:27443
MMARE11_00720	0.494833	-1.01499	0.0283508	ssb single-strand binding protein Ssb 73472:73999 forward MW:17855
MMARE11_16870	0.415567	-1.26685	0.0283549	mas multifunctional mycocerosic acid synthase membrane-associated Mas 2012806:2019105 forward MW:222895
MMARE11_23710	0.425567	-1.23254	0.0284387	infC initiation factor IF-3 InfC 2822035:2822538 forward MW:18879
MMARE11_52770	0.340712	-1.55337	0.0285447	MMARE11_52770 Esx-1 secretion associated protein EspI 6288516:6291194 forward MW:93154
MMARE11_34740	0.498767	-1.00356	0.0287034	MMARE11_34740 aminotransferase (adenosylmethionine-8-amino-7-oxononanoate) BioA 4220465:4221820 forward MW:49063
MMARE11_09890	0.498767	-1.00356	0.0287162	rplB 50S ribosomal protein L2, RplB 1209136:1209978 forward MW:30442
MMARE11_10240	0.8266	-0.274739	0.0290802	MMARE11_10240 conserved protein 1237085:1237750 forward MW:23740
MMARE11_28230	0.9	-0.152003	0.0290818	beta-1,3-glucanase
MMARE11_11010	2	1	0.0291252	MMARE11_11010 transcriptional regulator 1318018:1318527 forward MW:18499
MMARE11_35690	2.00763	1.0055	0.0293184	EsaT-6 like protein EsxP_3
MMARE11_20170	2.00763	1.0055	0.029377	MMARE11_20170 conserved hypothetical protein 2392224:2392958 forward MW:27135
MMARE11_53130	2.00763	1.0055	0.0294453	MMARE11_53130 conserved protein 6333137:6333685 reverse MW:19822
MMARE11_06960	2.0113	1.00813	0.0297415	MMARE11_06960 tuberculin related peptide 843963:844445 forward MW:16680
MMARE11_52790	2.01543	1.01109	0.0297457	MMARE11_52790 Esx-1 secretion associated protein EspJ 6292853:6293680 forward MW:26278
MMARE11_21450	2.01543	1.01109	0.02993	ribH riboflavin synthase beta chain RibH 2535954:2536436 forward MW:16382
MMARE11_47930	2.01543	1.01109	0.0299737	lprN MCE-family lipoprotein LprN 5741169:5742320 reverse MW:40874
MMARE11_20130	2.01543	1.01109	0.0299823	MMARE11_20130 conserved hypothetical protein 2386216:2387340 reverse MW:40568
MMARE11_32320	2.0163	1.01171	0.0300795	ahpE peroxiredoxin AhpE 3943736:3944197 reverse MW:16749
MMARE11_06970	2.0163	1.01171	0.030339	sodC periplasmic superoxide dismutase [Cu-Zn] SodC 844518:845234 forward MW:23616
MMARE11_09420	2.0163	1.01171	0.0305871	rplL 50S ribosomal protein L7/L12, RplL 1153401:1153793 forward MW:13428
MMARE11_51200	2.0235	1.01685	0.0309478	MMARE11_51200 conserved hypothetical membrane protein 6099118:6099495 forward MW:12938
MMARE11_47920	2.0267	1.01913	0.0311163	mce4F MCE-family protein Mce4F 5739475:5741157 reverse MW:59022
MMARE11_31000	2.0267	1.01913	0.0312444	pbpB penicillin-binding membrane protein PbpB 3738300:3740375 reverse MW:74151
MMARE11_03200	2.0267	1.01913	0.0313518	MMARE11_03200 conserved protein 375299:375679 forward MW:13692
MMARE11_01770	2.029	1.02077	0.0314094	esxA_1 6 kDa culture filtrate antigen EsxA_1 (early secreted antigenic target-Esat6) 214052:214339 forward MW:9871
MMARE11_27241	2.029	1.02077	0.0314864	MMARE11_27241 conserved membrane protein 3269863:3270360 reverse MW:16646
MMARE11_52180	2.033	1.02361	0.0315605	sodA superoxide dismutase [fe] SodA 6226887:6227510 forward MW:23192
MMARE11_13010	2.033	1.02361	0.031623	sigH alternative RNA polymerase sigma-E factor (sigma-24) SigH (RpoE) 1571225:1571992 forward MW:28392
MMARE11_43920	2.033	1.02361	0.0317187	phoS2 periplasmic phosphate-binding lipoprotein PhoS2 5322642:5323754 reverse MW:37516
MMARE11_04700	2.033	1.02361	0.0317459	MMARE11_04700 conserved hypothetical protein 557213:557509 reverse MW:11121
MMARE11_22030	2.033	1.02361	0.0319366	MMARE11_22030 transcriptional regulatory protein 2607864:2608427 reverse MW:21418
MMARE11_23640	2.03573	1.02555	0.0319501	MMARE11_23640 conserved protein 2810304:2810696 forward MW:14369
MMARE11p_00040	2.04973	1.03544	0.0319663	MMARE11p_00040 hypothetical protein 19601:19798 reverse MW:6950
MMARE11_49620	2.0539	1.03837	0.0319942	cspA_1 cold shock protein A CspA_1 5931873:5932076 reverse MW:7342
MMARE11_10040	2.0539	1.03837	0.0320202	rplE 50S ribosomal protein L5, RplE 1220779:1221351 forward MW:21304
MMARE11_46820	2.0539	1.03837	0.0320954	MMARE11_46820 conserved hypothetical protein 5621490:5621843 forward MW:12693
MMARE11_39120	2.0539	1.03837	0.0322332	thrC threonine synthase ThrC 4762581:4763663 reverse MW:37331
MMARE11_03990	2.0539	1.03837	0.0324662	MMARE11_03990 conserved secretory protein 462194:463219 forward MW:35833
MMARE11_07930	2.05497	1.03911	0.0324989	hemC porphobilinogen deaminase HemC 952382:953326 forward MW:32561
MMARE11_04110	2.05497	1.03911	0.0325717	MMARE11_04110 conserved hypothetical protein 479677:480414 reverse MW:26409
MMARE11_43640	2.05497	1.03911	0.0329182	MMARE11_43640 conserved hypothetical protein 5285471:5286538 forward MW:37794
MMARE11_52320	2.05497	1.03911	0.0329592	mpt64 immunogenic protein Mpt64 6237805:6238497 forward MW:25321
MMARE11_21270	2.05617	1.03996	0.0330196	metK s-adenosylmethionine synthetase MetK 2516325:2517536 forward MW:43051
MMARE11_05870	2.15617	1.10847	0.0332138	grpE GrpE protein (Hsp-70 cofactor) 697115:697768 forward MW:22690
MMARE11_01740	2.05813	1.04134	0.0332622	MMARE11_01740 PE family protein, PE35 212150:212446 forward MW:9616
MMARE11_50040	2.05813	1.04134	0.0333317	MMARE11_50040 anti-anti-sigma regulatory factor 5971025:5971393 reverse MW:12450
MMARE11_10030	2.05813	1.04134	0.0334968	rplX 50S ribosomal protein L24, RplX 1220459:1220782 forward MW:11659
MMARE11_05040	2.067	1.04754	0.033699	esxH EsaT-6 like protein EsxH 596955:597245 forward MW:10302
MMARE11_43410	2.067	1.04754	0.0337742	pepD serine protease PepD 5256810:5258249 reverse MW:47926
MMARE11_22590	2.067	1.04754	0.0337786	MMARE11_22590 conserved hypothetical membrane protein 2670486:2670986 forward MW:18287
MMARE11_44340	2.067	1.04754	0.0337946	MMARE11_44340 conserved hypothetical membrane protein 5358095:5358898 forward MW:27834
MMARE11_46530	2.067	1.04754	0.0341453	cspA cold shock protein a, CspA 5590158:5590361 reverse MW:7354
MMARE11_35950	2.067	1.04754	0.0342187	cfp2 low molecular weight antigen Cfp2 4362707:4363216 reverse MW:16696
MMARE11_23200	2.067	1.04754	0.034219	hisB imidazole glycerol-phosphate dehydratase HisB 2756457:2757089 forward MW:22869
MMARE11_18560	2.07113	1.05042	0.0343154	ald secreted L-alanine dehydrogenase Ald (40 kDa antigen) 2226542:2227657 reverse MW:38583
MMARE11_03800	2.073	1.05172	0.034357	mce1F MCE-family protein Mce1F 439546:441099 forward MW:54375
MMARE11_12180	2.073	1.05172	0.0351373	MMARE11_12180 peptide synthetase Nrp (peptide synthase) 1467040:1476513 forward MW:340828
MMARE11_03790	2.07447	1.05274	0.0351836	lprK MCE-family lipoprotein LprK (MCE-family lipoprotein Mce1E) 438326:439552 forward MW:43773
MMARE11_06730	2.07447	1.05274	0.0352034	MMARE11_06730 conserved hypothetical membrane protein 814355:814687 forward MW:11513
MMARE11_39090	2.07447	1.05274	0.0354879	rpmE 50S ribosomal protein L31 RpmE 4759012:4759257 reverse MW:8942
MMARE11_26410	2.07987	1.05649	0.0355349	MMARE11_26410 transcriptional regulatory protein 3185584:3186000 reverse MW:15150
MMARE11_43370	2.07987	1.05649	0.0355629	MMARE11_43370 conserved hypothetical serine rich protein 5254640:5254975 forward MW:11520
MMARE11_02940	2.07987	1.05649	0.0356292	pepA serine protease PepA 348720:349793 forward MW:35129
MMARE11_49900	2.07987	1.05649	0.0356687	MMARE11_49900 conserved protein with endoribonuclease L-PSP domain 5958501:5958956 reverse MW:15242
MMARE11_18950	2.09927	1.06989	0.0356738	MMARE11_18950 conserved 35 kDa alanine rich protein 2267034:2267849 forward MW:29221
MMARE11_21420	2.1	1.07039	0.0356914	lprG conserved lipoprotein LprG 2533107:2533808 reverse MW:24240
MMARE11_30740	2.1	1.07039	0.0357625	mbtH conserved protein MbtH 3690308:3690538 reverse MW:8672
MMARE11_04930	2.1	1.07039	0.0360673	MMARE11_04930 transcriptional regulatory protein (possibly TetR-family) 582411:583067 reverse MW:23348
MMARE11_15000	2.1	1.07039	0.0361483	MMARE11_15000 conserved hypothetical protein 1785193:1785816 forward MW:23471
MMARE11_10830	2.587	1.37128	0.0361837	groES 10 kDa chaperone (GroES) 1296070:1296372 forward MW:10715
MMARE11_08270	2.1	1.07039	0.0362937	MMARE11_08270 conserved hypothetical membrane protein 1015458:1015610 reverse MW:5537
MMARE11_10050	2.1	1.07039	0.036304	rpsN 30S ribosomal protein S14, RpsN 1221356:1221541 forward MW:6866
MMARE11_22620	2.1	1.07039	0.0363603	Cluster of pks5 probable polyketide synthase Pks5 2673622:2679894 reverse MW:222563 (MMARE11_22620)
MMARE11_03770	2.11147	1.07825	0.0363696	mce1C MCE-family protein Mce1C 435160:436725 forward MW:54522
MMARE11_06050	2.11147	1.07825	0.0365062	coxM carbon monoxyde dehydrogenase (medium chain), CoxM 734323:735213 forward MW:31479
MMARE11_05880	2.11733	1.08225	0.0365368	dnaJ chaperone protein, DnaJ 697826:699016 forward MW:41571
MMARE11_43400	2.12383	1.08667	0.0365698	moaB2 pterin-4-alpha-carbinolamine dehydratase MoaB2 5256268:5256813 reverse MW:18347
MMARE11_07350	2.12713	1.08891	0.036618	lpd dihydrolipoamide dehydrogenase Lpd 889104:890507 forward MW:49562
MMARE11_40950	2.133	1.09288	0.03671	MMARE11_40950 PE family protein 4981012:4981878 forward MW:29440
MMARE11_00920	2.13333	1.09311	0.0368345	MMARE11_00920 conserved hypothetical protein 122248:123339 forward MW:38394
MMARE11_00730	2.14227	1.09914	0.0370361	rpsR1 30S ribosomal protein S18-1 RpsR1 74045:74299 forward MW:9542
MMARE11_28140	2.1464	1.10192	0.0372108	MMARE11_28140 PE family protein 3364264:3364956 reverse MW:22113
MMARE11_25980	2.1464	1.10192	0.0374208	mycP5 proline rich membrane-anchored mycosin MycP5 3128142:3129884 forward MW:59837
MMARE11_13500	2.15277	1.10619	0.0374289	MMARE11_13500 hypothetical protein 1624752:1625015 forward MW:9879
MMARE11p_00230	2.16017	1.11114	0.0379275	MMARE11p_00230 hypothetical protein 111572:112387 forward MW:30261
MMARE11_00770	2.1685	1.1167	0.037971	MMARE11_00770 conserved hypothetical protein 78602:78850 forward MW:9331
MMARE11_21230	2.16867	1.11681	0.0380852	mihF integration host factor MihF 2513462:2513797 forward MW:12118
MMARE11_40940	2.18077	1.12484	0.0381733	fbiC F420 biosynthesis protein FbiC 4978237:4980807 reverse MW:92063
MMARE11_23730	2.20323	1.13962	0.0384157	rplT 50S ribosomal protein L20 RplT 2822834:2823223 forward MW:14472
MMARE11_09900	2.21033	1.14426	0.0384272	rpsS 50S ribosomal protein S19, RpsS 1210000:1210281 forward MW:10789
MMARE11_11910	2.22077	1.15106	0.0384712	lpdA dihydrolipoamide dehydrogenase LpdA 1431911:1433320 forward MW:49140
MMARE11p_00080	2.223	1.15251	0.0385051	MMARE11p_00080 Biofilm regulator BssS 15685:17151 reverse MW:48142
MMARE11_29500	2.22553	1.15415	0.0386348	MMARE11_29500 conserved hypothetical protein 3524338:3524643 forward MW:11772
MMARE11_51710	2.22553	1.15415	0.0388054	MMARE11_51710 conserved hypothetical protein 6159495:6159980 forward MW:17392
MMARE11_06070	2.233	1.15898	0.0389871	coxL carbon monoxyde dehydrogenase (large chain), CoxL 735692:738082 forward MW:85536
MMARE11_34820	2.233	1.15898	0.0394874	plcB membrane-associated phospholipase C 2 PlcB 4227975:4229540 reverse MW:56636
MMARE11_32380	2.2435	1.16575	0.039493	acpM meromycolate extension acyl carrier protein AcpM 3950863:3951210 forward MW:12454
MMARE11_35630	2.24407	1.16612	0.039709	MMARE11_35630 conserved hypothetical protein 4330452:4330769 reverse MW:11168
MMARE11_23720	2.2508	1.17044	0.0400777	rpmL 50S ribosomal protein L35, RpmL 2822569:2822763 forward MW:7266
MMARE11_36760	2.25493	1.17308	0.0401355	ndkA nucleoside diphosphate kinase NdkA 4477559:4477969 reverse MW:14664
MMARE11_22950	2.267	1.18078	0.0404776	MMARE11_22950 conserved protein 2727538:2727975 forward MW:16434
MMARE11_53070	2.27777	1.18762	0.0406601	trxC thioredoxin TrxC 6327240:6327593 forward MW:12565
MMARE11_08540	2.3	1.20163	0.0407012	MMARE11_08540 transcriptional regulator 1041867:1042460 reverse MW:21307
MMARE11_39010	2.31487	1.21093	0.0408255	atpF ATP synthase B chain AtpF 4752657:4753169 reverse MW:18137
MMARE11_29890	2.34153	1.22745	0.0410438	MMARE11_29890 conserved hypothetical protein 3570204:3571172 forward MW:31145
MMARE11_31040	2.34913	1.23213	0.0412642	MMARE11_31040 conserved hypothetical membrane protein 3743669:3744073 reverse MW:14603
MMARE11_52730	2.37897	1.25034	0.0412928	MMARE11_52730 PE family protein 6286238:6286534 forward MW:9545, PE35
MMARE11_44860	2.41777	1.27368	0.0413134	cspB cold shock-like protein B CspB 5423033:5423437 reverse MW:14837
MMARE11_28530	2.4178	1.27369	0.0413616	MMARE11_28530 ferredoxin reductase FdxD 3402083:3402298 reverse MW:7808
MMARE11_21100	2.433	1.28274	0.0414195	lprF conserved lipoprotein LprF 2497043:2497921 forward MW:29985
MMARE11_26240	2.4523	1.29414	0.04159	gcvH glycine cleavage system H protein GcvH 3162098:3162502 forward MW:14194
MMARE11_04050	2.47443	1.3071	0.041813	MMARE11_04050 conserved hypothetical protein 469640:470179 reverse MW:19769
MMARE11_09000	2.47673	1.30844	0.0418374	lpqN conserved lipoprotein, LpqN 1103738:1104418 reverse MW:23270
MMARE11_35200	2.51097	1.32824	0.0418928	MMARE11_35200 conserved hypothetical secreted protein 4266972:4267754 reverse MW:25608
MMARE11_16470	2.5212	1.33411	0.041954	hupB DNA-binding protein Hu, HupB 1959814:1960476 forward MW:22762
MMARE11_47530	2.533	1.34085	0.0419571	MMARE11_47530 conserved membrane protein 5695745:5696473 forward MW:24806
MMARE11_26820	2.54607	1.34827	0.0420793	bfrA bacterioferritin BfrA 3226598:3227077 forward MW:18303
MMARE11_47690	2.55697	1.35443	0.0421462	MMARE11_47690 conserved hypothetical protein 5716971:5717234 forward MW:9484
MMARE11_30850	2.5673	1.36025	0.0425185	wag31 conserved secreted antigen Wag31 3719662:3720456 reverse MW:28732
MMARE11_08580	2.57363	1.36381	0.0425312	MMARE11_08580 conserved protein 1045704:1046039 reverse MW:11842
MMARE11_27170	2.60873	1.38335	0.0428336	MMARE11_27170 PE-PGRS family protein 3263504:3263818 forward MW:8396
MMARE11_16200	2.6267	1.39325	0.042842	gatC glutamyl-tRNA(Gln) amidotransferase (subunit C) GatC 1929290:1929589 forward MW:10523
MMARE11_36730	2.633	1.39671	0.0435471	rpmA 50S ribosomal protein L27 RpmA 4473338:4473604 reverse MW:9258
MMARE11_38610	2.63333	1.39689	0.0436007	mce3B_1 MCE-family protein Mce3B_1 4697381:4698412 forward MW:36777
MMARE11_20020	2.7	1.43296	0.0439578	MMARE11_20020 conserved hypothetical protein 2374774:2375064 forward MW:10578
MMARE11_15690	2.81057	1.49086	0.0439742	MMARE11_15690 conserved protein 1874322:1874774 forward MW:16261
MMARE11_36810	2.81553	1.49341	0.0440132	MMARE11_36810 conserved hypothetical membrane protein 4483327:4483923 reverse MW:19688
MMARE11_32190	2.83333	1.5025	0.0440241	MMARE11_32190 conserved hypothetical protein 3927634:3927828 reverse MW:6869
MMARE11_06210	2.83333	1.5025	0.0444434	MMARE11_06210 conserved membrane protein 753027:753842 reverse MW:29511
MMARE11_26980	2.86667	1.51937	0.0444721	fbpB secreted antigen 85-B FbpB 3244837:3245814 reverse MW:34458
MMARE11_30080	2.967	1.569	0.0445347	MMARE11_30080 conserved protein 3595279:3595473 reverse MW:6943
MMARE11_40890	2.9685	1.56973	0.0447882	Cluster of fdxC ferredoxin FdxC 4971112:4971438 reverse MW:11896 (MMARE11_40890)
MMARE11_23680	3.02437	1.59663	0.0450435	MMARE11_23680 conserved hypothetical protein 2816322:2816576 reverse MW:9346
MMARE11_00070	3.04663	1.60722	0.0451994	MMARE11_00070 conserved hypothetical membrane protein 9951:10853 forward MW:30859
MMARE11_26580	3.133	1.64754	0.0452947	apa alanine and proline rich secreted protein Apa 3200453:3201487 forward MW:34869
MMARE11_49230	3.133	1.64754	0.0454306	lsr2 iron-regulated Lsr2 protein precursor 5890323:5890664 reverse MW:12065
MMARE11_20110	3.13333	1.6477	0.0455095	MMARE11_20110 conserved hypothetical protein 2384491:2384772 forward MW:9942
MMARE11_09600	3.16667	1.66297	0.0455706	MMARE11_09600 conserved hypothetical membrane protein 1179333:1179809 reverse MW:15662
MMARE11_00410	3.167	1.66312	0.0456441	transcriptional regulatory protein
MMARE11_06110	3.16973	1.66436	0.0456736	MMARE11_06110 membrane oxidoreductase 740456:741130 forward MW:24023
MMARE11_33970	3.18963	1.67339	0.0457249	MMARE11_33970 conserved hypothetical secreted protein 4129328:4129654 reverse MW:11324
MMARE11_10480	3.2	1.67807	0.0458713	rplQ 50S ribosomal protein L17, RplQ 1257523:1258092 forward MW:20281
MMARE11_07490	3.2236	1.68867	0.0460415	hbhA iron-regulated heparin binding hemagglutinin HbhA 903392:903997 forward MW:21886
MMARE11_41110	3.267	1.70797	0.0461111	MMARE11_41110 conserved hypothetical protein 4997210:4997398 reverse MW:6880
MMARE11_49910	3.3443	1.7417	0.0463995	MMARE11_49910 conserved hypothetical protein 5958978:5959139 reverse MW:5948
MMARE11_21380	3.433	1.77947	0.046499	Fmu protein
MMARE11_30020	3.49167	1.80392	0.0465106	tatA sec-independent protein translocase membrane-bound protein, TatA 3589734:3590000 reverse MW:9513
MMARE11_28500	3.5864	1.84254	0.0466444	MMARE11_28500 conserved hypothetical secreted protein 3398934:3399257 forward MW:11065
MMARE11_27060	3.677	1.87853	0.0467663	MMARE11_27060 conserved secreted protein 3252688:3252906 forward MW:7431
MMARE11_29390	3.71327	1.89269	0.0468023	MMARE11_29390 conserved hypothetical membrane protein 3501015:3501830 forward MW:28296
MMARE11_28420	3.72753	1.89822	0.0471762	MMARE11_28420 conserved hypothetical protein 3391057:3391335 forward MW:9838
MMARE11_32020	3.8102	1.92987	0.0471816	MMARE11_32020 conserved hypothetical membrane protein 3903838:3904350 reverse MW:17816
MMARE11_29120	3.8601	1.94864	0.047213	MMARE11_29120 conserved protein 3476868:3477101 forward MW:8066
MMARE11_05210	3.86013	1.94865	0.047488	MMARE11_05210 conserved hypothetical protein 614312:614698 forward MW:13977
MMARE11_11420	3.933	1.97563	0.0476751	MMARE11_11420 exported protein 1376950:1377378 reverse MW:14764
MMARE11_31060	4.15743	2.05569	0.0476773	lppM conserved lipoprotein LppM 3745083:3745811 forward MW:25544
MMARE11_51810	4.2	2.07039	0.0479082	MMARE11_51810 conserved hypothetical membrane protein 6176782:6177249 forward MW:16443
MMARE11_08280	4.26347	2.09203	0.047913	MMARE11_08280 conserved hypothetical membrane protein 1015705:1016025 forward MW:10967
MMARE11_25430	4.28877	2.10056	0.047954	MMARE11_25430 conserved hypothetical protein 3058779:3059456 forward MW:24975
MMARE11_29170	5.26583	2.39666	0.0480589	fdxA_2 ferredoxin FdxA_2 3480329:3480673 reverse MW:12307
MMARE11_48760	5.333	2.41495	0.048368	MMARE11_48760 conserved hypothetical secreted protein 5842064:5842471 forward MW:14642
MMARE11_44780	5.9165	2.56474	0.048617	MMARE11_44780 conserved transmembrane protein 5415055:5415342 forward MW:10092
MMARE11_52750	6.467	2.6931	0.0487377	10 kDa culture filtrate antigen EsxB
MMARE11_52760	6.967	2.80054	0.0488834	6 kDa culture filtrate antigen EsxA
MMARE11_52240	7.17753	2.84349	0.0490717	hns histone-like protein Hns 6231300:6231770 forward MW:16131
MMARE11_35620	7.2783	2.8636	0.0490791	Cluster of esxP_2 EsaT-6 like protein EsxP_2 4330023:4330319 reverse MW:10923 (MMARE11_35620)
MMARE11_34040	7.3425	2.87627	0.0490853	MMARE11_34040 conserved hypothetical protein 4136585:4136842 forward MW:9575
MMARE11_01760	8.0231	3.00416	0.049225	esxB_1 10 kDa culture filtrate antigen EsxB_1 213713:214015 forward MW:10736
MMARE11_25390	8.2449	3.0435	0.0493324	MMARE11_25390 putative signal-transduction protein containing cAMP-binding and CBS domains 3054171:3054587 reverse MW:14267
MMARE11_04660	8.33733	3.05959	0.0494077	MMARE11_04660 conserved hypothetical protein 553386:553544 reverse MW:5975
MMARE11_04280	8.4755	3.0833	0.0494264	MMARE11_04280 long-chain-fatty-acid-CoA ligase 500545:502032 forward MW:52630
MMARE11_09200	9.7118	3.27974	0.0495045	secE preprotein translocase (tail-anchored membrane protein), SecE 1128333:1128821 forward MW:17255
MMARE11_52820	0.438767	-1.18847	0.0495911	MMARE11_52820 Esx-1 secretion associated protein EspL 6297724:6298071 reverse MW:12267
