# Supplementary material for: Integrated transcriptomic and proteomic analysis of pathogenic mycobacteria and their esx-1 mutants reveal secretion-dependent regulation of ESX-1 substrates and WhiB6 as a transcriptional regulator
Source: PLoS One. 2019 Jan 23;14(1):e0211003. doi: 10.1371/journal.pone.0211003 (PMC6343904; doi:10.1371/journal.pone.0211003)
Supplement: S3 Table — (XLSX) [file pone.0211003.s003.xlsx]

## Sheet: ESX1_MT (S3)
Complete list of genes of which expression is significantly changed in the auxotrophic M. tuberculosis RD1 deletion mutant strain mc26030 compared to its isogenic control strain mc26020 during growth in 7H9 culture medium. P<0.05
Gene ID	foldChange	log2FoldChange	pval	Product
Rv3876	0.00289216	-8.43364	1.51806e-297	Rv3876 CONSERVED HYPOTHETICAL PROLINE AND ALANINE RICH PROTEIN (espI)
Rv3877	0.00268077	-8.54314	2.03767e-289	Rv3877 PROBABLE CONSERVED TRANSMEMBRANE PROTEIN (eccD1)
Rv3872	0.000255378	-11.9351	3.63828e-275	Rv3872 PE FAMILY-RELATED PROTEIN (PE35)
Rv3875	0.000107387	-13.1849	1.94379e-252	Rv3875 6 KDA EARLY SECRETORY ANTIGENIC TARGET ESXA (ESAT-6)
Rv3874	0.000109685	-13.1543	1.41356e-166	Rv3874 10 KDA CULTURE FILTRATE ANTIGEN ESXB (LHP) (CFP10)
Rv3878	0.00202609	-8.94709	5.08745e-165	Rv3878 CONSERVED HYPOTHETICAL ALANINE RICH PROTEIN (espJ)
Rv3873	0.000373816	-11.3854	6.52602e-111	Rv3873 PPE FAMILY PROTEIN (PPE68)
Rv3879c	0.0450715	-4.47164	4.92359e-86	Rv3879c HYPOTHETICAL ALANINE AND PROLINE RICH PROTEIN
Rv3290c	0.045131	-4.46974	1.10495e-84	Rv3290c PROBABLE L-LYSINE-EPSILON AMINOTRANSFERASE LAT (L-LYSINE AMINOTRANSFERASE) (LYSINE 6-AMINOTRANSFERASE)
Rv1986	0.21079	-2.24612	1.4391e-57	Rv1986 PROBABLE CONSERVED INTEGRAL MEMBRANE PROTEIN
Rv3289c	0.038791	-4.68813	3.26352e-40	Rv3289c POSSIBLE TRANSMEMBRANE PROTEIN
Rv1295	2.79571	1.48321	5.2102e-24	Rv1295 PROBABLE THREONINE SYNTHASE THRC
Rv3293	0.365102	-1.45363	3.41025e-23	Rv3293 PROBABLE PIPERIDEINE-6-CARBOXILIC ACID DEHYDROGENASE PCD (PIPERIDEINE-6-CARBOXYLATE DEHYDROGENASE)
Rv1294	2.58232	1.36867	3.19026e-21	Rv1294 PROBABLE HOMOSERINE DEHYDROGENASE THRA
Rv3862c	0.206552	-2.27542	7.9534e-19	Rv3862c POSSIBLE TRANSCRIPTIONAL REGULATORY PROTEIN WHIB-LIKE WHIB6
Rv3288c	0.177186	-2.49666	3.23225e-14	Rv3288c PUTATIVE PROTEIN USFY
Rv3861	0.258577	-1.95134	4.62487e-14	Rv3861 HYPOTHETICAL PROTEIN
Rv1361c	0.530633	-0.914215	9.48309e-14	Rv1361c PPE FAMILY PROTEIN
Rv1296	2.85237	1.51216	2.97401e-12	Rv1296 PROBABLE HOMOSERINE KINASE THRB
Rv3292	0.322783	-1.63137	3.61643e-12	Rv3292 CONSERVED HYPOTHETICAL PROTEIN
Rv1196	2.43762	1.28547	1.00851e-08	Rv1196 PPE FAMILY PROTEIN
Rv2053c	0.602158	-0.731787	3.2856e-07	Rv2053c PROBABLE TRANSMEMBRANE PROTEIN
Rv1076	0.660256	-0.598902	7.15804e-06	Rv1076 POSSIBLE LIPASE LIPU
Rv3197A	0.594838	-0.749431	1.50899e-05	Rv3197A PROBABLE TRANSCRIPTIONAL REGULATORY PROTEIN WHIB-LIKE WHIB7
Rv1773c	0.668527	-0.580942	3.73817e-05	Rv1773c PROBABLE TRANSCRIPTIONAL REGULATORY PROTEIN
Rv3294c	0.493093	-1.02007	4.73638e-05	Rv3294c CONSERVED HYPOTHETICAL PROTEIN
Rv3863	0.674725	-0.567629	4.76695e-05	Rv3863 HYPOTHETICAL ALANINE RICH PROTEIN
Rv3259	0.688488	-0.538497	7.23881e-05	Rv3259 CONSERVED HYPOTHETICAL PROTEIN
Rv1187	0.644549	-0.633638	7.26761e-05	Rv1187 PROBABLE PYRROLINE-5-CARBOXYLATE DEHYDROGENASE ROCA
Rv2319c	2.12845	1.0898	9.84949e-05	Rv2319c HYPOTHETICAL PROTEIN
Rv2885c	0.679108	-0.558287	0.000117267	Rv2885c PROBABLE TRANSPOSASE
Rv1374c	1.36109	0.444764	0.000279541	Rv1374c HYPOTHETICAL PROTEIN
Rv1768	0.706996	-0.500226	0.000289632	Rv1768 PE-PGRS FAMILY PROTEIN
Rv0341	0.474182	-1.07649	0.0003504	Rv0341 ISONIAZID INDUCTIBLE GENE PROTEIN INIB
Rv3287c	0.70596	-0.502342	0.000388703	Rv3287c ANTI-SIGMA FACTOR RSBW (SIGMA NEGATIVE EFFECTOR)
Rv0709	1.36903	0.453154	0.000499768	Rv0709 PROBABLE 50S RIBOSOMAL PROTEIN L29 RPMC
Rv1217c	0.680548	-0.555232	0.000528291	Rv1217c PROBABLE TETRONASIN-TRANSPORT INTEGRAL MEMBRANE PROTEIN ABC TRANSPORTER
Rv3340	1.45651	0.542519	0.00053324	Rv3340 PROBABLE O-ACETYLHOMOSERINE SULFHYDRYLASE METC (HOMOCYSTEINE SYNTHASE) (O-ACETYLHOMOSERINE (THIOL)-LYASE) (OAH SULFHYDRYLASE) (O-ACETYL-L-HOMOSERINE SULFHYDRYLASE)
Rv2132	1.45391	0.539938	0.000545781	Rv2132 CONSERVED HYPOTHETICAL PROTEIN
Rv3588c	0.759186	-0.397475	0.00078313	Rv3588c CARBONIC ANHYDRASE (CARBONATE DEHYDRATASE) (CARBONIC DEHYDRATASE)
Rv3291c	0.277103	-1.85151	0.000865999	Rv3291c PROBABLE TRANSCRIPTIONAL REGULATORY PROTEIN (PROBABLY ASNC-FAMILY)
Rv3269	0.723942	-0.466053	0.000891774	Rv3269 CONSERVED HYPOTHETICAL PROTEIN
Rv1805c	0.761178	-0.393694	0.00107971	Rv1805c HYPOTHETICAL PROTEIN
Rv1698	0.747515	-0.419825	0.00134773	Rv1698 CONSERVED HYPOTHETICAL PROTEIN
Rv0702	1.3047	0.383721	0.00154066	Rv0702 PROBABLE 50S RIBOSOMAL PROTEIN L4 RPLD
Rv2745c	0.750931	-0.413248	0.00190387	Rv2745c POSSIBLE TRANSCRIPTIONAL REGULATORY PROTEIN
Rv2255c	0.672557	-0.572272	0.00195616	Rv2255c HYPOTHETICAL PROTEIN
Rv0718	1.35229	0.435406	0.00212766	Rv0718 PROBABLE 30S RIBOSOMAL PROTEIN S8 RPSH
Rv2825c	0.694596	-0.525754	0.00220902	Rv2825c CONSERVED HYPOTHETICAL PROTEIN
Rv3880c	0.763357	-0.38957	0.0023207	Rv3880c CONSERVED HYPOTHETICAL PROTEIN
Rv2894c	0.746789	-0.421227	0.00245987	Rv2894c PROBABLE INTEGRASE/RECOMBINASE XERC
Rv1765c	0.7286	-0.456802	0.00248755	Rv1765c CONSERVED HYPOTHETICAL PROTEIN
Rv2886c	0.634363	-0.656619	0.00254808	Rv2886c PROBABLE RESOLVASE
Rv1856c	1.33315	0.414838	0.00259462	Rv1856c POSSIBLE OXIDOREDUCTASE
Rv1497	0.769605	-0.37781	0.00273111	Rv1497 PROBABLE ESTERASE LIPL
Rv0040c	0.741647	-0.431196	0.00279873	Rv0040c SECRETED PROLINE RICH PROTEIN MTC28 (PROLINE RICH 28 KDA ANTIGEN)
Rv1810	0.772808	-0.371817	0.00280782	Rv1810 CONSERVED HYPOTHETICAL PROTEIN
Rv2052c	0.754954	-0.405539	0.00292083	Rv2052c CONSERVED HYPOTHETICAL PROTEIN
Rv3136	1.40044	0.485876	0.00302143	Rv3136 PPE FAMILY PROTEIN
Rv1987	0.697577	-0.519575	0.00346571	Rv1987 POSSIBLE CHITINASE
Rv0715	1.29291	0.370624	0.00366681	Rv0715 PROBABLE 50S RIBOSOMAL PROTEIN L24 RPLX
Rv2986c	0.775301	-0.367171	0.00369125	Rv2986c PROBABLE DNA-BINDING PROTEIN HU HOMOLOG HUPB (HISTONE-LIKE PROTEIN) (HLP) (21-KDA LAMININ-2-BINDING PROTEIN)
Rv3864	0.772957	-0.371539	0.00370739	Rv3864 CONSERVED HYPOTHETICAL PROTEIN
Rv3413c	0.783717	-0.351596	0.0038015	Rv3413c HYPOTHETICAL ALANINE AND PROLINE RICH PROTEIN
Rv2030c	1.60019	0.678242	0.00400991	Rv2030c CONSERVED HYPOTHETICAL PROTEIN
Rv0794c	0.726224	-0.461514	0.00439874	Rv0794c PROBABLE OXIDOREDUCTASE
Rv0342	0.583841	-0.776352	0.00459518	Rv0342 ISONIAZID INDUCTIBLE GENE PROTEIN INIA
Rv0814c	0.770318	-0.376473	0.00504957	Rv0814c CONSERVED HYPOTHETICAL PROTEIN SSEC2
Rv2321c	0.603098	-0.729536	0.00513494	Rv2321c PROBABLE ORNITHINE AMINOTRANSFERASE (C-terminus part) ROCD2 (ORNITHINE--OXO-ACID AMINOTRANSFERASE)
Rv1068c	2.07462	1.05285	0.0051407	Rv1068c PE-PGRS FAMILY PROTEIN
Rv0722	1.30669	0.38592	0.00578177	Rv0722 PROBABLE 50S RIBOSOMAL PROTEIN L30 RPMD
Rv2985	0.796769	-0.327766	0.00583971	Rv2985 POSSIBLE HYDROLASE MUTT1
Rv0708	1.28655	0.363508	0.00598191	Rv0708 PROBABLE 50S RIBOSOMAL PROTEIN L16 RPLP
Rv1954c	0.751107	-0.412909	0.00608676	Rv1954c HYPOTHETICAL PROTEIN
Rv0716	1.26731	0.341769	0.00615459	Rv0716 PROBABLE 50S RIBOSOMAL PROTEIN L5 RPLE
Rv0717	1.28913	0.366401	0.00692763	Rv0717 PROBABLE 30S RIBOSOMAL PROTEIN S14 RPSN1
Rv0721	1.26068	0.334203	0.00707743	Rv0721 PROBABLE 30S RIBOSOMAL PROTEIN S5 RPSE
Rv2950c	1.24928	0.321099	0.00708041	Rv2950c PROBABLE FATTY-ACID-CoA LIGASE FADD29 (FATTY-ACID-CoA SYNTHETASE) (FATTY-ACID-CoA SYNTHASE)
Rv2190c	1.26379	0.337758	0.00741391	Rv2190c CONSERVED HYPOTHETICAL PROTEIN
Rv2911	1.3382	0.420291	0.00764235	Rv2911 PROBABLE D-ALANYL-D-ALANINE CARBOXYPEPTIDASE DACB2 (PENICILLIN-BINDING PROTEIN) (DD-PEPTIDASE) (DD-CARBOXYPEPTIDASE) (PBP) (DD-TRANSPEPTIDASE) (SERINE-TYPE D-ALA-D-ALA CARBOXYPEPTIDASE) (D-AMINO ACID HYDROLASE)
Rv2748c	0.798533	-0.324575	0.00810208	Rv2748c POSSIBLE CELL DIVISION TRANSMEMBRANE PROTEIN FTSK
Rv0098	1.57292	0.653445	0.00811355	Rv0098 CONSERVED HYPOTHETICAL PROTEIN
Rv3756c	0.754468	-0.406469	0.00840984	Rv3756c POSSIBLE OSMOPROTECTANT (GLYCINE BETAINE/CARNITINE/CHOLINE/L-PROLINE) TRANSPORT INTEGRAL MEMBRANE PROTEIN ABC TRANSPORTER PROZ
Rv3867	0.793993	-0.332803	0.00849671	Rv3867 CONSERVED HYPOTHETICAL PROTEIN
Rv2710	0.810723	-0.302718	0.00862961	Rv2710 RNA POLYMERASE SIGMA FACTOR SIGB
Rv1964	0.6397	-0.644532	0.00875152	Rv1964 CONSERVED HYPOTHETICAL INTEGRAL MEMBRANE PROTEIN YRBE3A
Rv0397	0.63155	-0.663032	0.0087582	Rv0397 CONSERVED 13E12 REPEAT FAMILY PROTEIN
Rv1434	0.756265	-0.403036	0.00878983	Rv1434 HYPOTHETICAL PROTEIN
Rv1778c	0.676908	-0.562968	0.00921113	Rv1778c HYPOTHETICAL PROTEIN
Rv3695	0.71415	-0.485701	0.00925989	Rv3695 POSSIBLE CONSERVED MEMBRANE PROTEIN
Rv2978c	0.776784	-0.364415	0.00959224	Rv2978c PROBABLE TRANSPOSASE
Rv0804	0.751315	-0.412509	0.0098044	Rv0804 CONSERVED HYPOTHETICAL PROTEIN
Rv0118c	1.4384	0.524467	0.0103272	Rv0118c PROBABLE OXALYL-CoA DECARBOXYLASE OXCA
Rv1772	0.792484	-0.335546	0.0103498	Rv1772 HYPOTHETICAL PROTEIN
Rv0707	1.2455	0.316721	0.0105034	Rv0707 PROBABLE 30S RIBOSOMAL PROTEIN S3 RPSC
Rv2244	0.811323	-0.301652	0.0106666	Rv2244 MEROMYCOLATE EXTENSION ACYL CARRIER PROTEIN ACPM
Rv1359	0.710178	-0.493746	0.0108872	Rv1359 PROBABLE TRANSCRIPTIONAL REGULATORY PROTEIN
Rv0710	1.25904	0.332321	0.0110838	Rv0710 PROBABLE 30S RIBOSOMAL PROTEIN S17 RPSQ
Rv2975c	0.728486	-0.457026	0.0111678	Rv2975c CONSERVED HYPOTHETICAL PROTEIN
Rv3881c	0.81246	-0.299631	0.011564	Rv3881c CONSERVED HYPOTHETICAL ALANINE AND GLYCINE RICH PROTEIN
Rv2504c	0.788497	-0.342822	0.011663	Rv2504c PROBABLE SUCCINYL-COA:3-KETOACID-COENZYME A TRANSFERASE (ALPHA SUBUNIT) SCOA (3-OXO ACID:CoA TRANSFERASE) (OXCT A) (SUCCINYL-COA:3-OXOACID-COENZYME A TRANSFERASE)
Rv2422	2.29986	1.20154	0.0123739	Rv2422 HYPOTHETICAL PROTEIN
Rv0039c	0.792529	-0.335465	0.0125734	Rv0039c POSSIBLE CONSERVED TRANSMEMBRANE PROTEIN
Rv0053	1.27151	0.346547	0.0126502	Rv0053 PROBABLE 30S RIBOSOMAL PROTEIN S6 RPSF
Rv1198	1.23484	0.304322	0.0127214	Rv1198 PUTATIVE ESAT-6 LIKE PROTEIN ESXL (ESAT-6 LIKE PROTEIN 4)
Rv2974c	0.731234	-0.451595	0.0129977	Rv2974c CONSERVED HYPOTHETICAL ALANINE RICH PROTEIN
Rv3871	0.810405	-0.303286	0.0135775	Rv3871 CONSERVED HYPOTHETICAL PROTEIN
Rv3176c	0.671875	-0.573734	0.0140774	Rv3176c PROBABLE EPOXIDE HYDROLASE MEST (EPOXIDE HYDRATASE) (ARENE-OXIDE HYDRATASE)
Rv2959c	1.29108	0.36858	0.0142669	Rv2959c POSSIBLE METHYLTRANSFERASE (METHYLASE)
Rv0737	0.621188	-0.686899	0.0149902	Rv0737 POSSIBLE TRANSCRIPTIONAL REGULATORY PROTEIN
Rv3357	1.59203	0.670867	0.015405	Rv3357 CONSERVED HYPOTHETICAL PROTEIN
Rv2910c	1.42885	0.514859	0.0154136	Rv2910c CONSERVED HYPOTHETICAL PROTEIN
Rv0720	1.2619	0.335595	0.0158538	Rv0720 PROBABLE 50S RIBOSOMAL PROTEIN L18 RPLR
Rv3485c	1.32675	0.407902	0.0163982	Rv3485c PROBABLE SHORT-CHAIN TYPE DEHYDROGENASE/REDUCTASE
Rv2999	1.37556	0.460018	0.016677	Rv2999 PROBABLE CONSERVED LIPOPROTEIN LPPY
Rv0704	1.24911	0.320901	0.0170902	Rv0704 PROBABLE 50S ribosomal protein L2 RPLB
Rv2945c	1.25746	0.330512	0.0180747	Rv2945c PROBABLE CONSERVED LIPOPROTEIN LPPX
Rv2650c	0.72334	-0.467253	0.0181224	Rv2650c POSSIBLE phiRv2 PROPHAGE PROTEIN
Rv1748	0.747832	-0.419214	0.0184382	Rv1748 HYPOTHETICAL PROTEIN
Rv0179c	0.786029	-0.347345	0.0185528	Rv0179c POSSIBLE LIPOPROTEIN LPRO
Rv1751	0.811516	-0.301309	0.0186537	Rv1751 PROBABLE OXIDOREDUCTASE
Rv0612	0.701613	-0.511252	0.018994	Rv0612 CONSERVED HYPOTHETICAL PROTEIN
Rv1387	1.25651	0.329426	0.0190991	Rv1387 PPE FAMILY PROTEIN
Rv3076	0.689502	-0.536373	0.0193965	Rv3076 CONSERVED HYPOTHETICAL PROTEIN
Rv2776c	0.783753	-0.351529	0.0198835	Rv2776c PROBABLE OXIDOREDUCTASE
Rv2301	1.25374	0.32624	0.0203472	Rv2301 PROBABLE CUTINASE CUT2
Rv1171	1.24243	0.313164	0.0206772	Rv1171 CONSERVED HYPOTHETICAL PROTEIN
Rv1333	0.779194	-0.359945	0.0210645	Rv1333 PROBABLE HYDROLASE
Rv1658	0.792423	-0.335657	0.0214432	Rv1658 Probable Argininosuccinate synthase argG
Rv0753c	0.793613	-0.333492	0.0215058	Rv0753c PROBABLE METHYLMALONATE-SEMIALDEHYDE DEHYDROGENASE MMSA (METHYLMALONIC ACID SEMIALDEHYDE DEHYDROGENASE) (MMSDH)
Rv2354	0.46071	-1.11807	0.0217991	Rv2354 PROBABLE TRANSPOSASE
Rv0695	1.22191	0.28914	0.0225222	Rv0695 CONSERVED HYPOTHETICAL PROTEIN
Rv1205	1.25432	0.326905	0.0227268	Rv1205 CONSERVED HYPOTHETICAL PROTEIN
Rv2934	1.21348	0.279153	0.0229624	Rv2934 PHENOLPTHIOCEROL SYNTHESIS TYPE-I POLYKETIDE SYNTHASE PPSD
Rv0207c	0.825498	-0.276664	0.0230049	Rv0207c CONSERVED HYPOTHETICAL PROTEIN
Rv1905c	0.783401	-0.352177	0.02311	Rv1905c PROBABLE D-AMINO ACID OXIDASE AAO
Rv3353c	0.64817	-0.625556	0.0232346	Rv3353c CONSERVED HYPOTHETICAL PROTEIN
Rv3358	1.6426	0.715977	0.0241234	Rv3358 CONSERVED HYPOTHETICAL PROTEIN
Rv3202c	0.757275	-0.401111	0.0242314	Rv3202c POSSIBLE ATP-DEPENDENT DNA HELICASE
Rv1009	1.2186	0.285221	0.0248771	Rv1009 Probable resuscitation-promoting factor rpfB
Rv0605	0.765822	-0.38492	0.0251996	Rv0605 POSSIBLE RESOLVASE
Rv0064	0.81261	-0.299366	0.0254138	Rv0064 PROBABLE CONSERVED TRANSMEMBRANE PROTEIN
Rv2066	1.24384	0.314802	0.0257405	Rv2066 Probable bifunctional protein, CobI-CobJ fusion protein: S-adenosyl-L-methionine-precorrin-2 methyl transferase + precorrin-3 methylase
Rv0633c	0.786403	-0.346659	0.025828	Rv0633c POSSIBLE EXPORTED PROTEIN
Rv3241c	0.817177	-0.29128	0.0258972	Rv3241c CONSERVED HYPOTHETICAL PROTEIN
Rv1040c	1.67774	0.746519	0.0260071	Rv1040c PE FAMILY PROTEIN
Rv1197	1.28556	0.362399	0.026055	Rv1197 ESAT-6 LIKE PROTEIN ESXK (ESAT-6 LIKE PROTEIN 3)
Rv0093c	1.31538	0.39548	0.0261006	Rv0093c PROBABLE CONSERVED MEMBRANE PROTEIN
Rv0499	0.780747	-0.357074	0.0261897	Rv0499 CONSERVED HYPOTHETICAL PROTEIN
Rv1038c	1.60807	0.685333	0.0263317	Rv1038c ESAT-6 LIKE PROTEIN ESXJ (ESAT-6 LIKE PROTEIN 2)
Rv0210	1.28617	0.363081	0.0265639	Rv0210 HYPOTHETICAL PROTEIN
Rv0230c	1.35294	0.436095	0.0272779	Rv0230c PROBABLE PHOSPHOTRIESTERASE PHP (PARATHION HYDROLASE) (PTE) (ARYLDIALKYLPHOSPHATASE) (PARAOXONASE) (A-ESTERASE) (ARYLTRIPHOSPHATASE) (PARAOXON HYDROLASE)
Rv2791c	0.794168	-0.332484	0.0273454	Rv2791c PROBABLE TRANSPOSASE
Rv0854	1.2463	0.317652	0.0278152	Rv0854 CONSERVED HYPOTHETICAL PROTEIN
Rv0309	0.827945	-0.272393	0.0284499	Rv0309 POSSIBLE CONSERVED EXPORTED PROTEIN
Rv2416c	0.773626	-0.370292	0.0285721	Rv2416c ENHANCED INTRACELLULAR SURVIVAL PROTEIN EIS
Rv2288	1.23114	0.299993	0.0288524	Rv2288 HYPOTHETICAL PROTEIN
Rv2769c	1.41615	0.501973	0.0289744	Rv2769c PE FAMILY PROTEIN
Rv2245	0.826652	-0.274647	0.0301538	Rv2245 3-OXOACYL-[ACYL-CARRIER PROTEIN] SYNTHASE 1 KASA (BETA-KETOACYL-ACP SYNTHASE) (KAS I)
Rv0637	1.19982	0.262823	0.0302978	Rv0637 CONSERVED HYPOTHETICAL PROTEIN
Rv3238c	0.794543	-0.331803	0.0306738	Rv3238c PROBABLE CONSERVED INTEGRAL MEMBRANE PROTEIN
Rv2721c	0.834162	-0.2616	0.0307055	Rv2721c POSSIBLE CONSERVED TRANSMEMBRANE ALANINE AND GLYCINE RICH PROTEIN
Rv2165c	0.813013	-0.298649	0.0310692	Rv2165c CONSERVED HYPOTHETICAL PROTEIN
Rv0404	1.23089	0.299706	0.0313842	Rv0404 PROBABLE FATTY-ACID-CoA LIGASE FADD30 (FATTY-ACID-CoA SYNTHETASE) (FATTY-ACID-CoA SYNTHASE)
Rv1168c	1.27834	0.354268	0.031398	Rv1168c PPE FAMILY PROTEIN
Rv2220	1.19646	0.25877	0.0317634	Rv2220 GLUTAMINE SYNTHETASE GLNA1 (GLUTAMINE SYNTHASE) (GS-I)
Rv0175	1.19777	0.260347	0.0322367	Rv0175 PROBABLE CONSERVED MCE ASSOCIATED MEMBRANE PROTEIN
Rv2944	1.32125	0.401904	0.032391	Rv2944 POSSIBLE TRANSPOSASE FOR INSERTION SEQUENCE ELEMENT IS1533
Rv2068c	1.22844	0.296825	0.0336466	Rv2068c CLASS A BETA-LACTAMASE BLAC
Rv1507c	1.2206	0.28759	0.0337884	Rv1507c CONSERVED HYPOTHETICAL PROTEIN
Rv2002	1.29052	0.367954	0.0339909	Rv2002 POSSIBLE 20-BETA-HYDROXYSTEROID DEHYDROGENASE FABG3 (Cortisone reductase) ((R)-20-hydroxysteroid dehydrogenase)
Rv2873	1.44354	0.529612	0.0340779	Rv2873 CELL SURFACE LIPOPROTEIN MPT83 (LIPOPROTEIN P23)
Rv2525c	0.820368	-0.285657	0.0342252	Rv2525c CONSERVED HYPOTHETICAL PROTEIN
Rv3675	0.819061	-0.287957	0.0342912	Rv3675 POSSIBLE MEMBRANE PROTEIN
Rv1618	1.21311	0.278709	0.0343393	Rv1618 Probable acyl-CoA thioesterase II tesB1
Rv0119	1.26147	0.335107	0.0344569	Rv0119 PROBABLE FATTY-ACID-CoA LIGASE FADD7 (FATTY-ACID-CoA SYNTHETASE) (FATTY-ACID-CoA SYNTHASE)
Rv3230c	1.23049	0.299239	0.03453	Rv3230c HYPOTHETICAL OXIDOREDUCTASE
Rv2111c	1.21311	0.278714	0.0352708	Rv2111c CONSERVED HYPOTHETICAL PROTEIN
Rv0909	1.22317	0.290627	0.0354691	Rv0909 CONSERVED HYPOTHETICAL PROTEIN
Rv2015c	0.808863	-0.306032	0.0355817	Rv2015c CONSERVED HYPOTHETICAL PROTEIN
Rv1001	1.2348	0.304282	0.0366875	Rv1001 PROBABLE ARGININE DEIMINASE ARCA (ADI) (AD) (ARGININE DIHYDROLASE)
Rv0078A	0.817536	-0.290646	0.0371214	Rv0078A HYPOTHETICAL PROTEIN
Rv3891c	1.21712	0.283469	0.0374624	Rv3891c POSSIBLE ESAT-6 LIKE PROTEIN ESXD
Rv1172c	1.19746	0.25998	0.0378446	Rv1172c PE FAMILY PROTEIN
Rv3266c	0.815376	-0.294462	0.0383062	Rv3266c dTDP-6-DEOXY-L-LYXO-4-HEXULOSE REDUCTASE RMLD (dTDP-RHAMNOSE MODIFICATION PROTEIN) (dTDP-RHAMNOSE BIOSYNTHESIS PROTEIN) (dTDP-RHAMNOSE SYNTHASE)
Rv0136	0.813967	-0.296957	0.0383066	Rv0136 PROBABLE CYTOCHROME P450 138 CYP138
Rv2073c	1.34285	0.425303	0.0392858	Rv2073c Probable shortchain dehydrogenase
Rv3185	1.40551	0.491095	0.0393266	Rv3185 PROBABLE TRANSPOSASE
Rv3628	1.22318	0.290634	0.0396215	Rv3628 INORGANIC PYROPHOSPHATASE PPA (PYROPHOSPHATE PHOSPHO-HYDROLASE) (PPASE) (INORGANIC DIPHOSPHATASE) (DIPHOSPHATE PHOSPHO-HYDROLASE)
Rv0703	1.24147	0.312049	0.0398422	Rv0703 PROBABLE 50S RIBOSOMAL PROTEIN L23 RPLW
Rv2702	1.23992	0.310248	0.0407677	Rv2702 POLYPHOSPHATE GLUCOKINASE PPGK (POLYPHOSPHATE-GLUCOSE PHOSPHOTRANSFERASE)
Rv2831	1.26119	0.334781	0.0408029	Rv2831 PROBABLE ENOYL-CoA HYDRATASE ECHA16 (ENOYL HYDRASE) (UNSATURATED ACYL-CoA HYDRATASE) (CROTONASE)
Rv0599c	0.757554	-0.400579	0.0408593	Rv0599c CONSERVED HYPOTHETICAL PROTEIN
Rv1332	0.834468	-0.261071	0.0410587	Rv1332 PROBABLE TRANSCRIPTIONAL REGULATORY PROTEIN
Rv3379c	0.705706	-0.502862	0.0412494	Rv3379c PROBABLE 1-DEOXY-D-XYLULOSE 5-PHOSPHATE SYNTHASE DXS2 (1-DEOXYXYLULOSE-5-PHOSPHATE SYNTHASE) (DXP SYNTHASE) (DXPS)
Rv0330c	1.55481	0.636737	0.04131	Rv0330c HYPOTHETICAL PROTEIN
Rv0643c	1.19328	0.254929	0.0417957	Rv0643c METHOXY MYCOLIC ACID SYNTHASE 3 MMAA3 (METHYL MYCOLIC ACID SYNTHASE 3) (MMA3) (HYDROXY MYCOLIC ACID SYNTHASE)
Rv3462c	1.20165	0.265013	0.0423417	Rv3462c PROBABLE TRANSLATION INITIATION FACTOR IF-1 INFA
Rv3191c	0.831004	-0.267073	0.0424791	Rv3191c PROBABLE TRANSPOSASE
Rv1199c	1.20404	0.267884	0.0436067	Rv1199c POSSIBLE TRANSPOSASE
Rv2737c	0.843115	-0.246199	0.0442424	Rv2737c RECA PROTEIN (RECOMBINASE A) [CONTAINS: ENDONUCLEASE PI-MTUI (MTU RECA INTEIN)].
Rv3869	0.832772	-0.264007	0.0444322	Rv3869 POSSIBLE CONSERVED MEMBRANE PROTEIN
Rv2466c	0.746629	-0.421536	0.0444352	Rv2466c CONSERVED HYPOTHETICAL PROTEIN
Rv2050	0.830059	-0.268714	0.0445721	Rv2050 CONSERVED HYPOTHETICAL PROTEIN
Rv3810	0.842404	-0.247415	0.0445878	Rv3810 EXPORTED REPETITIVE PROTEIN PRECURSOR PIRG (CELL SURFACE PROTEIN) (EXP53)
Rv0115	0.788902	-0.342082	0.0448362	Rv0115 POSSIBLE D-ALPHA-D-HEPTOSE-7-PHOSPHATE KINASE HDDA
Rv1974	1.5084	0.593022	0.0448649	Rv1974 PROBABLE CONSERVED MEMBRANE PROTEIN
Rv2801c	0.732348	-0.449398	0.0449266	Rv2801c CONSERVED HYPOTHETICAL PROTEIN
Rv3161c	0.771053	-0.375098	0.0453435	Rv3161c POSSIBLE DIOXYGENASE
Rv2887	0.791565	-0.337221	0.045989	Rv2887 PROBABLE TRANSCRIPTIONAL REGULATORY PROTEIN
Rv2360c	0.78935	-0.341264	0.0460336	Rv2360c HYPOTHETICAL PROTEIN
Rv1221	0.826318	-0.275231	0.0464195	Rv1221 ALTERNATIVE RNA POLYMERASE SIGMA FACTOR SIGE
Rv2718c	0.834789	-0.260516	0.0465315	Rv2718c CONSERVED HYPOTHETICAL PROTEIN
Rv3821	0.821402	-0.283839	0.0473213	Rv3821 PROBABLE CONSERVED INTEGRAL MEMBRANE PROTEIN
Rv0888	0.842941	-0.246496	0.0479246	Rv0888 PROBABLE EXPORTED PROTEIN
Rv3651	1.26706	0.341488	0.0483863	Rv3651 CONSERVED HYPOTHETICAL PROTEIN
Rv1125	0.790184	-0.339739	0.0484575	Rv1125 CONSERVED HYPOTHETICAL PROTEIN
Rv3763	1.18124	0.240308	0.049032	Rv3763 19 KDA LIPOPROTEIN ANTIGEN PRECURSOR LPQH
Rv0134	0.834883	-0.260354	0.0492236	Rv0134 POSSIBLE EPOXIDE HYDROLASE EPHF (EPOXIDE HYDRATASE) (ARENE-OXIDE HYDRATASE)
Rv2075c	0.833983	-0.26191	0.0493782	Rv2075c Possible hypothetical exported or envelope protein
Rv2256c	0.846063	-0.241163	0.0498793	Rv2256c CONSERVED HYPOTHETICAL PROTEIN
Rv0208c	0.83207	-0.265224	0.0498826	Rv0208c HYPOTHETICAL METHLYTRANSFERASE (METHYLASE)
