# Supplementary material for: Integrated transcriptomic and proteomic analysis of pathogenic mycobacteria and their esx-1 mutants reveal secretion-dependent regulation of ESX-1 substrates and WhiB6 as a transcriptional regulator
Source: PLoS One. 2019 Jan 23;14(1):e0211003. doi: 10.1371/journal.pone.0211003 (PMC6343904; doi:10.1371/journal.pone.0211003)
Supplement: S4 Table — (XLSX) [file pone.0211003.s004.xlsx]

## Sheet: E11_INT_ESX1_INT (S4)
Complete list of genes of which expression is significantly changed in M. marinum eccCb1 transposon mutant vs wild-type strain during infection of THP-1 cells. P<0.05
gene ID	log2FoldChange	p_value	product
MMARE11_39770	4.34345	0	conserved hypothetical protein
MMARE11_17760	3.91594	2.22e-15	conserved hypothetical membrane protein
MMARE11_39780	4.05612	2e-14	conserved hypothetical protein
MMARE11_39760	4.54649	2.78e-14	ESX-1 secretion-associated protein A, EspA
MMARE11_28260	3.62881	3.38e-13	hypothetical protein
MMARE11_21360	3.47353	3.91e-13	methyltransferase
MMARE11_24440	3.42754	8.81e-13	PPE family protein
MMARE11_04720	3.30911	3.57e-12	heat shock protein Hsp
MMARE11_24450	3.72287	8.61e-12	PPE family protein, PPE23
MMARE11_10910	3.63941	2e-11	WhiB-like regulatory protein, WhiB3
MMARE11_40510	3.10429	2.57e-10	conserved integral membrane transport protein
MMARE11_46160	3.36359	5.69e-10	PE-PGRS family protein
MMARE11_19330	2.85185	2.35e-09	conserved hypothetical protein
MMARE11_33970	2.7939	4.89e-09	conserved hypothetical secreted protein
MMARE11_44970	2.89912	8.64e-09	conserved hypothetical protein
MMARE11_23810	2.79637	1.42e-08	PE-PGRS family protein
MMARE11_25880	2.55817	1.73e-08	hypothetical protein
MMARE11_47140	2.55327	1.9e-08	conserved hypothetical protein
MMARE11_28270	2.86162	1.98e-08	conserved hypothetical membrane protein
MMARE11_14990	2.61209	3.26e-08	oxidoreductase
MMARE11_29540	2.425	8.2e-08	conserved hypothetical membrane protein
MMARE11_02840	2.37137	2.1e-07	conserved hypothetical protein
MMARE11_04780	2.29715	4.37e-07	integral membrane nitrite extrusion protein NarK3_2
MMARE11_46150	2.36961	4.63e-07	integral membrane protein
MMARE11_47130	2.67367	7.04e-07	conserved hypothetical integral membrane protein
MMARE11_51420	2.41063	7.18e-07	O-methyltransferase
MMARE11_23690	2.2247	7.66e-07	conserved hypothetical membrane protein
MMARE11_19270	3.2945	9.35e-07	RNA polymerase sigma factor SigB
MMARE11_35450	3.13147	1.3e-06	integral membrane nitrite extrusion protein NarK1
MMARE11_22700	2.19091	2.53e-06	conserved hypothetical protein
MMARE11_44980	2.51764	2.63e-06	conserved hypothetical protein
MMARE11_35980	-3.81639	2.69e-06	non-ribosomal peptide synthetase
MMARE11_22690	2.12844	2.94e-06	hypothetical protein
MMARE11_19740	2.37464	3.45e-06	conserved secreted protein
MMARE11_18940	2.45756	5.48e-06	transcriptional regulatory protein
MMARE11_30210	-4.36855	5.53e-06	polyketide synthase PKS
MMARE11_46140	2.23725	5.78e-06	dehydrogenase
MMARE11_10520	2.10477	6.62e-06	PPE family protein
MMARE11_05310	2.07727	8.71e-06	conserved hypothetical protein
MMARE11_49420	1.98136	1.04e-05	EsaT-6 like protein EsxP_1
MMARE11_35190	2.65426	1.11e-05	conserved hypothetical protein
MMARE11_44450	-3.32266	1.25e-05	PPE family protein
MMARE11_30210	-3.79959	1.29e-05	polyketide synthase and peptide synthetase
MMARE11_42210	2.45363	1.31e-05	conserved hypothetical protein
MMARE11_25930	1.9424	1.57e-05	PE family protein, PE19
MMARE11_15600	-3.03276	1.85e-05	PPE family protein
MMARE11_02850	2.30965	1.97e-05	divalent cation-transport integral membrane protein
MMARE11_01310	1.99803	2.01e-05	conserved hypothetical membrane protein
MMARE11_25940	1.99466	2.24e-05	EsaT-6 like protein EsxM
MMARE11_33230	1.90729	2.24e-05	phosphate-transport permease PitB
MMARE11_24360	1.938	2.25e-05	myo-inositol-1-phosphate synthase
MMARE11_33950	1.95726	2.33e-05	conserved hypothetical protein
MMARE11_13330	2.84756	3.11e-05	transcriptional regulatory protein Whib-like WhiB7
MMARE11_49420	1.88434	3.28e-05	EsaT-6 like protein EsxP
MMARE11_10530	2.45502	3.9e-05	conserved hypothetical membrane protein
MMARE11_01780	1.9264	4.19e-05	conserved hypothetical EsxB-like protein, EsxB_2
MMARE11_28670	1.86055	4.67e-05	conserved protein
MMARE11_29130	1.89441	4.82e-05	heat shock protein transcriptional repressor HspR_2
MMARE11_04400	-5.99903	5.13e-05	PE-PGRS family protein
MMARE11_49410	2.09439	5.95e-05	EsaT-6 like protein EsxN_2
MMARE11_14930	-5.94607	6.02e-05	dehydrogenase
MMARE11_09820	-3.44681	6.34e-05	PPE family protein
MMARE11_22710	1.94676	6.36e-05	rhamnosyl transferase WbbL2
MMARE11_24430	1.80368	6.75e-05	integral membrane drug efflux protein
MMARE11_06910	2.04238	7.94e-05	transmembrane protein
MMARE11_33960	2.44269	8.07e-05	heat shock protein HspX_1
MMARE11_32450	1.8472	8.86e-05	flavoprotein
MMARE11_32600	1.9217	8.99e-05	conserved transmembrane protein, MmpS5_2
MMARE11_25890	1.78706	9.2e-05	PPE family protein, PPE25
MMARE11_31190	-3.08846	9.57041e-05	polyprenyl synthetase IdsB_1
MMARE11_35980	-2.42727	0.000127193	non-ribosomal peptide synthetase
MMARE11_36470	2.27742	0.000137056	enhanced intracellular survival protein Eis
MMARE11_35980	-2.38422	0.000156902	non-ribosomal peptide synthetase
MMARE11_52140	2.31596	0.0001627	bacterioferritin BfrB
MMARE11_21990	1.74569	0.00016291	thioredoxin TrxB1
MMARE11_41350	-3.42621	0.000165512	PPE family protein
MMARE11_42270	-3.60653	0.000168508	PE-PGRS family protein
MMARE11_33320	-3.85025	0.000182274	PE-PGRS family protein, PE_PGRS22
MMARE11_35470	2.14341	0.000192095	formate dehydrogenase H FdhF
MMARE11_52210	1.80036	0.000196578	conserved protein
MMARE11_26750	2.20597	0.000197558	alkyl hydroperoxide reductase D protein AhpD
MMARE11_51640	-5.52394	0.000209679	PE-PGRS family protein
MMARE11_01740	1.71775	0.000252169	PE family protein, PE35
MMARE11_47800	-1.57193	0.000293235	acyl-coenzyme A synthetase
MMARE11_28290	1.62954	0.000331456	cutinase precursor
MMARE11_51340	1.75374	0.000333409	19 kDa lipoprotein antigen precursor LpqH
MMARE11_41010	-4.42124	0.000356211	PE-PGRS family protein
MMARE11_01810	1.90283	0.000356536	conserved hypothetical alanine and proline rich protein
MMARE11_20420	-4.67857	0.000366339	PE-PGRS family protein
MMARE11_01290	1.61034	0.000385872	lipid-transfer protein Ltp1_1
MMARE11_08810	-5.28548	0.000413963	hypothetical protein
MMARE11_20900	1.78102	0.000415888	conserved hypothetical protein
MMARE11_27560	2.16962	0.000435838	phosphotransferase
MMARE11_01900	-1.0762	0.000439727	L-serine dehydratase SdaA
MMARE11_30210	-2.59492	0.000457174	polyketide synthase PKS
MMARE11_48090	-3.62606	0.000458594	PE-PGRS family protein
MMARE11_49410	1.61121	0.000463623	EsaT-6 like protein EsxN_1
MMARE11_11310	-2.9459	0.000475753	8-amino-7-oxononanoate synthase BioF2_5
MMARE11_41630	1.58413	0.000480228	conserved hypothetical protein
MMARE11_30210	-2.31816	0.000482192	polyketide synthase PKS
MMARE11_35620	1.64862	0.000487678	EsaT-6 like protein EsxP_2
MMARE11_15410	1.65182	0.000499341	conserved hypothetical protein
MMARE11_35980	-2.33979	0.000505738	non-ribosomal peptide synthetase
MMARE11_50750	-1.31024	0.000540716	membrane-anchored adenylyl cyclase
MMARE11_19120	2.15651	0.0005507	GTP-binding protein HflX
MMARE11_09820	-2.65677	0.000572223	PPE family protein
MMARE11_46800	1.64129	0.000574011	conserved hypothetical protein
MMARE11_52510	-4.26205	0.00058406	conserved hypothetical transmembrane protein
MMARE11_51030	3.4447	0.000603196	PE family protein, PE34
MMARE11_04300	-3.63083	0.000617377	fatty-acid-CoA ligase
MMARE11_36700	-3.82418	0.00061804	PE-PGRS family protein
MMARE11_15600	-2.0884	0.000630431	PPE family protein
MMARE11_40830	-5.03811	0.00066857	PPE family protein
MMARE11_25770	-3.60538	0.000672015	PE-PGRS family protein, PE_PGRS50
MMARE11_16240	1.54843	0.000674731	oxidoreductase
MMARE11_33990	1.55112	0.000716676	conserved hypothetical protein
MMARE11_29530	1.64291	0.000722974	conserved hypothetical protein
MMARE11_18950	1.66955	0.000729312	conserved 35 kDa alanine rich protein
MMARE11_42560	-2.84524	0.000769289	conserved transmembrane transport protein, MmpL5_1
MMARE11_41300	-3.38753	0.000775624	PE-PGRS family protein
MMARE11_35410	-2.0863	0.000780733	peptide synthetase Nrp (peptide synthase)
MMARE11_39790	1.65369	0.000790944	transmembrane serine/threonine-protein kinase H, PknH_1
MMARE11_35970	-2.08552	0.000817329	non-ribosomal peptide synthetase MbtF
MMARE11_51500	-2.81923	0.000889739	PPE family protein
MMARE11_29280	-4.99502	0.000923682	PPE family protein
MMARE11_43410	1.60644	0.000960495	serine protease PepD
MMARE11_15690	1.57157	0.000968324	conserved protein
MMARE11_35990	-2.83776	0.00098672	conserved hypothetical protein
MMARE11_10840	2.27905	0.000988404	60 kDa chaperone (GroEL1)
MMARE11_51270	-4.33549	0.000997034	PE-PGRS family protein
MMARE11_46540	-2.10187	0.00100015	ATP-dependent RNA helicase, RhlE1
MMARE11_26510	1.60879	0.00105256	oxidoreductase
MMARE11_36020	-1.97335	0.00112396	polyketide synthase MbtD
MMARE11_42200	2.28291	0.00119882	conserved hypothetical protein
MMARE11_45450	-4.796	0.0012328	acyl-CoA dehydrogenase
MMARE11_37030	1.49257	0.00123771	conserved hypothetical protein
MMARE11_36040	-1.94276	0.0012573	lysine-N-oxygenase MbtG
MMARE11_51710	1.57666	0.00129902	conserved hypothetical protein
MMARE11_23840	-2.53939	0.00130122	PE-PGRS family protein
MMARE11_07550	-3.57885	0.0013677	PE-PGRS family protein
MMARE11_35030	-2.02612	0.00139131	hypothetical protein
MMARE11_01700	-3.83184	0.00140733	PE-PGRS family protein
MMARE11_42180	-4.74219	0.00140923	PE-PGRS family protein, PE_PGRS9_3
MMARE11_39930	1.68237	0.00141347	conserved hypothetical integral membrane protein
MMARE11_46040	-3.03455	0.00146054	dehydrogenase
MMARE11_52470	-3.95631	0.00146101	conserved hypothetical transmembrane protein
MMARE11_51230	-3.81766	0.00146851	PE-PGRS family protein
MMARE11_35960	-1.90363	0.00152148	phenyloxazoline synthase MbtB
MMARE11_18020	1.43655	0.00174222	ferric uptake regulation protein FurB-like protein
MMARE11_52440	-4.1326	0.00175571	conserved hypothetical transmembrane protein
MMARE11_31500	1.42793	0.00180205	conserved protein
MMARE11_29150	1.60966	0.00184413	GTP cyclohydrolase I FolE_1
MMARE11_34620	-2.22967	0.00186779	PPE family protein, PPE5
MMARE11_08880	1.42498	0.00187037	cytochrome P450 135B4 Cyp135B4
MMARE11_30280	-2.47534	0.00191101	PPE family protein, PPE37
MMARE11_12630	-2.70833	0.0019393	PPE family protein
MMARE11_43380	1.70038	0.00196916	conserved hypothetical membrane protein
MMARE11_46380	-2.67741	0.00198361	lycopene cyclase, CrtYc
MMARE11_35980	-1.85344	0.00199458	non-ribosomal peptide synthetase
MMARE11_38440	-1.84245	0.00200176	transmembrane ATP-binding protein ABC transporter
MMARE11_12700	1.47092	0.00201658	conserved protein
MMARE11_40050	1.42342	0.00209873	conserved membrane protein
MMARE11_23760	1.78422	0.00211818	PE family protein
MMARE11_51270	-4.06322	0.00212492	PE-PGRS family protein
MMARE11_38330	-3.08846	0.00213496	fatty-acid-CoA ligase FadD35_1
MMARE11_25910	1.40786	0.00213903	PPE family protein, PPE26
MMARE11_29510	1.53654	0.00214981	polyprenol-monophosphomannose synthase, Ppm1B
MMARE11_25410	-3.24603	0.0021692	Flavin-binding monooxygenase
MMARE11_12910	1.46341	0.00223966	conserved hypothetical membrane protein
MMARE11_34970	-3.66649	0.00229074	hypothetical protein
MMARE11_26030	1.49607	0.00230832	PPE family protein, PPE31
MMARE11_01820	1.61039	0.00231083	conserved hypothetical protein
MMARE11_41340	-2.56226	0.00232277	PPE family protein
MMARE11_39590	-4.63937	0.00234546	PE-PGRS family protein
MMARE11_38340	-3.34011	0.00238665	fatty-acid-CoA ligase
MMARE11_31560	1.52531	0.00242307	conserved hypothetical integral membrane protein
MMARE11_03660	-3.04654	0.00245164	monooxygenase
MMARE11_21270	1.63659	0.00250258	s-adenosylmethionine synthetase MetK
MMARE11_14760	-4.6093	0.0025168	conserved hypothetical protein
MMARE11_40920	1.52278	0.00257781	low molecular weight T-cell antigen TB8.4
MMARE11_03200	1.41867	0.00259463	conserved protein
MMARE11_38060	-3.4639	0.00262222	cytochrome P450 108B4 Cyp108B4
MMARE11_52490	-4.4778	0.00267347	conserved hypothetical protein
MMARE11_49410	1.66359	0.00267895	EsaT-6 like protein EsxN
MMARE11_52540	-3.61168	0.00268378	conserved hypothetical transmembrane protein
MMARE11_38200	-3.08547	0.00278345	fatty-acid-CoA ligase
MMARE11_44520	-2.37416	0.00283806	8-amino-7-oxononanoate synthase BioF2_1
MMARE11_51830	-3.20362	0.00289303	PE-PGRS family protein
MMARE11_38430	-1.95174	0.00290165	transmembrane ATP-binding protein ABC transporter
MMARE11_29010	1.42643	0.00294005	transcriptional regulatory protein (probably TetR-family)
MMARE11_33280	-3.57791	0.00295618	NADPH:adrenodoxin oxidoreductase FprA
MMARE11_46360	-2.98919	0.00295806	phytoene dehydrogenase CrtI
MMARE11_52120	-2.49376	0.00300114	conserved hypothetical protein
MMARE11_35980	-1.94123	0.0030204	non-ribosomal peptide synthetase MbtE
MMARE11_44250	-3.31255	0.00311775	PE-PGRS family protein
MMARE11_36130	-1.74757	0.00314353	isochorismate synthase MbtI
MMARE11_02050	-3.55288	0.00317344	conserved hypothetical protein
MMARE11_21930	1.35568	0.00319005	conserved hypothetical protein
MMARE11_12130	2.14051	0.00320451	mycobacterial conserved protein, UsfY
MMARE11_28040	-3.67902	0.00321502	MCE-family protein Mce3C
MMARE11_29500	1.65723	0.00324023	conserved hypothetical protein
MMARE11_38420	-2.28839	0.00326352	conserved hypothetical protein
MMARE11_39830	1.39397	0.00330136	conserved hypothetical protein
MMARE11_48420	1.34496	0.00334423	cytochrome P450 125A6 Cyp125A6
MMARE11_32820	-2.03747	0.00336634	conserved hypothetical protein
MMARE11_21690	1.44477	0.00337007	phosphoenolpyruvate carboxylase, Ppc
MMARE11_26890	1.36653	0.00337116	cytochrome P450 140A5 Cyp140A5
MMARE11_40710	-3.15265	0.00338484	nitrite extrusion protein, NarK3_3
MMARE11_21950	1.51787	0.00341622	acyl-CoA dehydrogenase FadE15
MMARE11_02790	-2.46446	0.00345291	monoxygenase
MMARE11_52420	-3.21351	0.00351218	conserved hypothetical membrane protein
MMARE11_30230	1.60194	0.00352989	dihydrolipoamide dehydrogenase Lpd_1
MMARE11_35980	-1.71538	0.00353235	non-ribosomal peptide synthetase
MMARE11_42560	-1.8623	0.00355614	conserved transmembrane transport protein MmpL4_1
MMARE11_52660	1.48465	0.00359154	conserved hypothetical protein
MMARE11_12960	-3.26366	0.00360817	conserved hypothetical alanine and glycine rich protein
MMARE11_52480	-3.20224	0.00363262	conserved hypothetical transmembrane protein
MMARE11_13340	1.69072	0.00372789	conserved ATP-binding protein ABC transporter
MMARE11_52591	-3.85025	0.00375283	conserved hypothetical alanine and glycine rich protein
MMARE11_31160	-3.47914	0.00390432	diphosphomevalonate decarboxylase
MMARE11_40740	-3.32354	0.00396159	glycolipid sulfotransferase
MMARE11_00290	-1.17727	0.0040282	shortchain dehydrogenase
MMARE11_04310	-1.6934	0.00407	peptide synthetase
MMARE11_41360	-2.40969	0.00420758	PE family protein
MMARE11_35440	1.31647	0.00421033	methylase
MMARE11_28880	-2.3081	0.00427091	conserved transmembrane transport protein
MMARE11_36150	1.31935	0.00447673	conserved membrane permease
MMARE11_21790	-2.04788	0.00449703	trehalose-6-phosphate phosphatase OtsB1
MMARE11_08410	1.60581	0.0046674	low-affinity inorganic phosphate transporter, PitA
MMARE11_30210	-1.65827	0.00472193	polyketide synthase Pks6
MMARE11_29950	-2.73548	0.00478207	conserved alanine and proline rich protein
MMARE11_09020	-2.21761	0.00493852	alpha-1,2-mannosidase
MMARE11_10890	-2.38021	0.00500087	PPE family protein
MMARE11_26860	1.29361	0.00511734	conserved hypothetical amidase
MMARE11_29260	-3.5057	0.0051616	PPE family protein
MMARE11_52190	1.38431	0.00516164	conserved hypothetical membrane protein
MMARE11_02320	-3.14043	0.00517695	short-chain type dehydrogenase/reductase
MMARE11_49220	1.67956	0.00535081	endopeptidase ATP binding protein (chain B) ClpB
MMARE11_03990	1.45784	0.00539928	conserved secretory protein
MMARE11_11110	-3.21277	0.00544094	conserved hypothetical protein
MMARE11_01800	1.5076	0.00547718	conserved hypothetical EsxA-like protein, EsxA_2
MMARE11_38850	1.52887	0.00552937	glyoxalase, GloA_1
MMARE11_46980	1.31122	0.00567024	conserved hypothetical protein
MMARE11_24490	-2.62509	0.00581657	acyl-CoA dehydrogenase
MMARE11_07650	1.26923	0.005845	two-component sensory transduction protein RegX3
MMARE11_08580	1.2734	0.00592135	conserved protein
MMARE11_49730	3.698	0.00596476	hypothetical protein
MMARE11_05810	-3.31967	0.00604976	aerobic-type carbon monoxide dehydrogenase, CoxM_3
MMARE11_15540	1.27779	0.00605561	conserved hypothetical protein
MMARE11_45440	-2.49579	0.00605592	cytochrome P450 188A3 Cyp188A3
MMARE11_33860	-3.65968	0.00612528	ketoacyl-acyl carrier protein synthase III
MMARE11_46390	-4.2335	0.00623305	lycopene cyclase, CrtYd
MMARE11_49700	-3.65091	0.00626205	conserved hypothetical protein
MMARE11_28140	1.33977	0.00626913	PE family protein
MMARE11_35270	1.26839	0.00635987	conserved hypothetical protein
MMARE11_51600	-3.06606	0.00641272	PE-PGRS family protein
MMARE11_36050	-1.91487	0.00642753	bifunctional enzyme MbtA: salicyl-AMP ligase (SAL-AMP ligase) + salicyl-S-ACP synthetase
MMARE11_52930	-2.32608	0.00644115	ADP-ribosyltransferse
MMARE11_31750	-3.14575	0.00652666	conserved hypothetical protein
MMARE11_09800	-2.50604	0.0065612	PPE family protein
MMARE11_30210	-2.20249	0.00657197	long-chain acyl-CoA synthetase
MMARE11_50910	1.25089	0.00682702	conserved hypothetical membrane protein
MMARE11_26160	-3.39856	0.00686559	PE-PGRS family protein, PE_PGRS9_1
MMARE11_14030	-2.79215	0.00691403	FAD-dependent oxidoreductase
MMARE11_01670	-2.20779	0.00693442	MCE-family protein Mce6D
MMARE11_38140	-2.86415	0.00697436	fatty-acid-CoA ligase FadD19_2
MMARE11_46520	-3.60653	0.00700196	PE-PGRS family protein
MMARE11_01070	1.25082	0.00704341	conserved hypothetical protein
MMARE11_38170	-3.03193	0.00705818	acyl-CoA dehydrogenase
MMARE11_39580	-2.44897	0.00707364	drug-transport transmembrane ATP-binding protein ABC transporter
MMARE11_38180	-3.24988	0.00729784	acyl-CoA dehydrogenase
MMARE11_19340	1.25362	0.00737138	PE-PGRS family protein
MMARE11_23180	1.52559	0.00744351	histidinol dehydrogenase HisD
MMARE11_01260	-2.2377	0.00745638	acyl-CoA dehydrogenase FadE6_1
MMARE11_36010	-1.89469	0.00757912	polyketide synthase MbtC
MMARE11_46370	-2.76089	0.00758753	phytoene synthase, CrtB
MMARE11_20370	1.24451	0.00766884	pyridoxine biosynthesis protein, SnzP
MMARE11_33850	-3.08431	0.00777431	ketoacyl-acyl carrier protein synthase III
MMARE11_41460	-1.54719	0.00777522	5-methyltetrahydropteroyltriglutamate--homocysteine methyltransferase MetE
MMARE11_26270	1.2287	0.00800309	conserved protein
MMARE11_05680	1.72237	0.00802601	aspartate aminotransferase AspC
MMARE11_52390	-2.47451	0.00812533	conserved hypothetical transmembrane protein
MMARE11_46400	-1.82689	0.00816119	conserved transmembrane transport protein MmpL13_1
MMARE11_01090	-2.92241	0.0081951	cytochrome P450 279A2 Cyp279A2
MMARE11_11300	-2.1279	0.00819569	fatty-acid-CoA ligase FadD29_1
MMARE11_21110	-2.39297	0.00850037	conserved membrane protein
MMARE11_25100	-1.68395	0.00857405	PPE family protein, PPE8
MMARE11_44510	-2.12658	0.00858681	conserved two-domain transmembrane protein
MMARE11_17610	1.83549	0.00874746	soluble secreted antigen Mpt53 precursor
MMARE11_28280	1.34722	0.00879545	hypothetical protein
MMARE11_18650	-3.03882	0.00880827	conserved hypothetical protein
MMARE11_35500	-2.44805	0.00884324	conserved integral membrane transport protein
MMARE11_05880	1.34233	0.00898976	chaperone protein, DnaJ
MMARE11_36030	-2.29408	0.00901821	conserved hypothetical protein MbtH_1
MMARE11_45140	-2.53244	0.00909212	fatty-acid-CoA ligase FadD3_2
MMARE11_37850	-3.16486	0.0091281	coenzyme F420-dependent oxidoreductase
MMARE11_07640	1.2663	0.0091482	two-component sensor histidine kinase SenX3
MMARE11_38100	-2.53028	0.00915142	oxidoreductase
MMARE11_23630	1.64597	0.00928635	iron-regulated conserved protein
MMARE11_35420	-3.4857	0.00938929	conserved hypothetical oxidase
MMARE11_49390	-2.75831	0.00946509	PPE family protein, PPE65
MMARE11_21890	1.36687	0.00949358	conserved protein
MMARE11_25390	1.20053	0.009527	conserved hypothetical protein
MMARE11_03350	-2.04663	0.00955151	PE family protein
MMARE11_46060	-2.03576	0.00958871	conserved hypothetical hydroxylase
MMARE11_46020	-3.00609	0.00961629	dehydrogenase/reductase
MMARE11_01830	1.48998	0.00972155	conserved hypothetical membrane protein
MMARE11_52820	1.40185	0.00976952	conserved hypothetical protein
MMARE11_37910	-2.19759	0.00995292	PPE family protein
MMARE11_04730	1.19661	0.010062	nitrite reductase [NAD(P)H] large subunit [fad flavoprotein] NirB
MMARE11_50450	1.654	0.0100729	aspartate kinase Ask
MMARE11_03250	1.19353	0.0101552	transcriptional regulatory protein (possibly TetR-family)
MMARE11_05820	-2.11821	0.0101705	aerobic-type carbon monoxide dehydrogenase, CoxL_3
MMARE11_18960	1.22917	0.0102145	conserved hypothetical membrane protein
MMARE11_07870	-3.44939	0.0102606	hypothetical protein
MMARE11_23420	1.29415	0.0103983	cutinase Cut1
MMARE11_28060	-2.76923	0.0104243	MCE-family lipoprotein LprM
MMARE11_52400	-2.76867	0.0104397	conserved hypothetical transmembrane protein
MMARE11_42560	-1.51552	0.0104671	conserved transmembrane transport protein-MmpL family
MMARE11_32610	1.18402	0.0104765	cytochrome P450 124A1, Cyp124A1
MMARE11_32780	-2.12327	0.0104907	PPE family protein
MMARE11_17811	-2.88824	0.0105093	PE-PGRS family protein, PE_PGRS
MMARE11_38290	-3.43909	0.0105149	enoyl-CoA hydratase EchA10_1
MMARE11_41660	-2.7646	0.010561	conserved hypothetical alanine and glycine rich protein
MMARE11_38040	-2.57973	0.0105698	zinc-containing alcohol dehydrogenase NAD dependent AdhB_1
MMARE11_07090	2.26271	0.010595	60 kDa chaperonin 2 GroEL2
MMARE11_00860	2.14745	0.0106263	conserved hypothetical MbtH-like protein
MMARE11_01690	-1.943	0.0108111	MCE-family protein Mce6F
MMARE11_47330	-1.59938	0.0108178	serine/threonine-protein kinase PknF_2
MMARE11_08120	-2.1139	0.0108232	glycine-sarcosine methyltransferase
MMARE11_40280	1.26302	0.0108669	alternative RNA polymerase sigma factor SigE
MMARE11_46030	-2.42367	0.0109978	monoxygenase
MMARE11_01640	-1.95401	0.0109992	MCE-family protein Mce6A
MMARE11_52410	-2.70488	0.0110064	PPE family protein
MMARE11_42560	-1.5977	0.0110456	conserved transmembrane transport protein MmpL1
MMARE11_11800	-2.63212	0.0110571	conserved hypothetical 13E12 repeat family protein
MMARE11_12920	-2.7007	0.011138	conserved hypothetical membrane protein
MMARE11_02160	-2.94814	0.0112314	conserved hypothetical secreted protein
MMARE11_38320	-2.50888	0.0112999	long-chain fatty-acid CoA ligase
MMARE11_01320	1.25306	0.0113038	transcriptional regulator
MMARE11_39970	-2.86027	0.0113351	PE-PGRS family protein
MMARE11_02640	4.41266	0.0114545	50S ribosomal protein L31 RpmE_1
MMARE11_44850	1.27952	0.0115135	acyl-CoA dehydrogenase FadE10
MMARE11_02770	-2.2333	0.0115909	dioxygenase
MMARE11_11600	-2.11296	0.0117074	PE-PGRS family protein
MMARE11_47840	-3.39329	0.0117148	phosphate-transport ATP-binding protein ABC transporter PstB
MMARE11_35020	-1.85671	0.0117609	PE-PGRS family protein
MMARE11_10600	-1.89484	0.0118001	conserved membrane protein
MMARE11_37500	-1.84605	0.0119171	Mce family protein, Mce5B
MMARE11_25140	1.3075	0.0120171	hypothetical membrane protein
MMARE11_15000	1.22729	0.0120451	conserved hypothetical protein
MMARE11_02780	-2.66753	0.0122152	monooxygenase
MMARE11_43670	-2.03012	0.0122749	PPE family protein
MMARE11_28070	-2.59047	0.0124517	MCE-family protein Mce3F
MMARE11_51300	-2.21049	0.0124772	acyl-CoA dehydrogenase FadE1_1
MMARE11_37870	-3.03754	0.0126704	acyl-CoA dehydrogenase
MMARE11_14940	-2.10671	0.0126739	conserved hypothetical membrane protein
MMARE11_31140	-2.75704	0.0128983	hydroxymethylglutaryl-coenzyme A (HMG-CoA) reductase
MMARE11_35730	-1.57202	0.0129031	PPE family protein
MMARE11_14040	-3.14424	0.0130667	transcriptional regulatory protein
MMARE11_05800	-3.01669	0.0133187	carbon monoxyde dehydrogenase (small chain), CoxS_3
MMARE11_46080	-3.33709	0.0133609	transcriptional regulatory protein
MMARE11_33150	-1.96738	0.0133795	pyruvate ferredoxin/flavodoxin oxidoreductase family protein
MMARE11_44530	-2.74313	0.0133873	cysteine synthase B CysM
MMARE11_03630	-2.87968	0.0134521	dehydrogenase
MMARE11_45500	-1.90367	0.0134984	membrane-associated phospholipase C 2 PlcB_3
MMARE11_14020	-3.32864	0.0136387	conserved hypothetical protein
MMARE11_45320	-2.30838	0.0136777	MCE-family lipoprotein
MMARE11_26985	-3.32198	0.0138279	hypothetical protein
MMARE11_15220	-2.48609	0.0138832	conserved hypothetical membrane protein
MMARE11_46940	1.41497	0.0139287	UDP-glucose-4-epimerase, CpsY
MMARE11_01781	1.16037	0.0141677	conserved hypothetical EsxA-like protein, EsxA_3
MMARE11_37080	-2.08826	0.0142574	drug-transport integral membrane protein
MMARE11_45850	-1.9128	0.0143177	acyl-CoA transferase
MMARE11_28940	-2.77176	0.0143488	conserved hypothetical sugar transport protein
MMARE11_29140	2.61077	0.0143581	molecular chaperone (small heat shock protein)
MMARE11_26610	1.14029	0.0143756	conserved hypothetical membrane protein
MMARE11_52970	-1.60825	0.0144881	conserved hypothetical protein
MMARE11_17820	-2.065	0.0145239	8-amino-7-oxononanoate synthase BioF2_3
MMARE11_17980	1.2279	0.0146448	nickel/iron-hydrogenase I small subunit, HyaA
MMARE11_46860	-1.9863	0.014732	transposase for ISMyma06
MMARE11_11180	-1.7729	0.0147512	DNA polymerase III, alpha chain, DnaE2
MMARE11_19320	1.26391	0.0147887	conserved hypothetical protein
MMARE11_52530	-2.46346	0.0148078	conserved hypothetical transmembrane protein
MMARE11_08640	-1.39203	0.0148187	transmembrane carbonic anhydrase, SulP_1
MMARE11_10580	-2.41598	0.0148406	membrane-anchored serine protease (mycosin), MycP4
MMARE11_26710	1.13223	0.0148717	conserved protein
MMARE11_36000	-1.89255	0.0148764	thioesterase
MMARE11_19300	1.39153	0.0149205	conserved membrane protein
MMARE11_27970	-2.69929	0.015049	cytochrome P450 278A1 Cyp278A1
MMARE11_08530	1.26021	0.0151833	mannosyltransferase, PimB
MMARE11_40750	-2.58796	0.0151936	conserved hypothetical membrane protein
MMARE11_06550	-1.59053	0.0152268	fatty acyl-AMP ligase FadD30
MMARE11_39680	-2.83028	0.0152849	citrate (pro-3s)-lyase (beta subunit) CitE_1
MMARE11_14920	-2.06455	0.0153928	conserved hypothetical protein
MMARE11_02730	-2.06437	0.0154018	acyl-CoA synthetase
MMARE11_14780	-3.07585	0.0154368	conserved hypothetical methyltransferase
MMARE11_46090	-2.20451	0.0154617	dehydrogenase
MMARE11_19030	-2.17197	0.0155324	methylthioadenine synthetase, MiaB
MMARE11_31200	-2.30927	0.0155424	terpene cyclase
MMARE11_16140	1.14456	0.0157243	methyltransferase
MMARE11_42140	1.5942	0.0157313	conserved hypothetical transmembrane protein
MMARE11_26980	1.30794	0.0157954	secreted antigen 85-B FbpB
MMARE11_01580	-2.39322	0.0158427	ATP-binding protein ABC transporter
MMARE11_29210	-2.81603	0.0158614	conserved hypothetical membrane protein
MMARE11_11550	-1.79747	0.0159971	PE-PGRS family protein, PE_PGRS9_4
MMARE11_01840	1.38481	0.0161396	conserved hypothetical protein
MMARE11_46220	-2.93926	0.0161858	acyl-CoA dehydrogenase
MMARE11_42560	-1.48206	0.0162385	conserved transmembrane transport protein, MmpL5_3
MMARE11_23850	1.1862	0.0163239	N-acetyl-gamma-glutamyl-phosphate reductase ArgC
MMARE11_37900	-2.15526	0.016361	fatty-acid-CoA ligase
MMARE11_36650	-3.05216	0.0163709	PE-PGRS family protein
MMARE11_41670	-3.78298	0.0163733	conserved hypothetical protein
MMARE11_27820	-2.55962	0.0164032	acyl-CoA dehydrogenase FadE17
MMARE11_10830	1.42357	0.0165049	10 kDa chaperone (GroES)
MMARE11_17410	-2.80017	0.0165192	conserved hypothetical membrane protein
MMARE11_36460	1.11303	0.0165775	conserved hypothetical membrane protein
MMARE11_03570	-3.64521	0.0167653	conserved hypothetical protein
MMARE11_42560	-1.6429	0.0168135	conserved transmembrane transport protein MmpL5_2
MMARE11_12000	-1.65011	0.0168691	arylsulfatase AtsB (aryl-sulfate sulphohydrolase)
MMARE11_38210	-2.47993	0.0169455	conserved hypothetical metal-dependent hydrolase
MMARE11_52310	-1.58738	0.0169709	conserved hypothetical secreted protein
MMARE11_38220	-3.03494	0.0170302	enoyl-CoA hydratase, EchA12_1
MMARE11_05900	-1.36401	0.0170717	PPE family protein
MMARE11_28330	-1.85001	0.0171726	conserved hypothetical hydrolase or acyltransferase
MMARE11_22160	1.11401	0.017212	conserved hypothetical secreted protein
MMARE11_41710	-1.95645	0.0173665	conserved hypothetical alanine and proline rich protein
MMARE11_47310	-1.82885	0.0174401	molybdopterin biosynthesis protein MoeY_1
MMARE11_45420	-2.77816	0.0174515	3-oxoacyl-[acyl-carrier protein] reductase
MMARE11_08800	-2.19085	0.0177319	transcriptional regulatory protein EmbR_2
MMARE11_28640	1.24527	0.0177566	conserved protein
MMARE11_37960	-1.97609	0.0177834	PPE family protein, PPE2
MMARE11_07340	-1.8372	0.0179153	8-amino-7-oxononanoate synthase BioF2_4
MMARE11_52550	-2.45703	0.0180402	conserved hypothetical transmembrane protein
MMARE11_38280	-3.20523	0.018061	conserved hypothetical protein
MMARE11_14050	-2.89418	0.0180747	acetaldehyde dehydrogenase, MhpF
MMARE11_35000	-1.72689	0.0180749	EsaT-6 like protein EsxK
MMARE11_33760	-1.51615	0.0180749	PPE family protein, PPE51_3
MMARE11_09030	-1.40191	0.0181963	conserved integral membrane protein
MMARE11_08770	-1.84116	0.0182161	PPE family protein
MMARE11_33450	1.11809	0.0182704	transcriptional regulatory protein (probably TetR-family)
MMARE11_00820	-1.56398	0.0182787	integral membrane efflux protein ErmB
MMARE11_42560	-1.37942	0.0183026	conserved transmembrane transport protein, MmpL
MMARE11_37770	-2.11828	0.0183383	conserved hypothetical membrane protein
MMARE11_39710	-2.02686	0.0183426	acyl-CoA dehydrogenase FadE3
MMARE11_19570	-2.20939	0.0183634	PE-PGRS family protein
MMARE11_40800	-1.3782	0.0185414	PPE family protein
MMARE11_35410	-1.33985	0.0186448	peptide synthetase Nrp (peptide synthase)
MMARE11_29800	-1.96913	0.0187065	conserved hypothetical secreted protein
MMARE11_00400	-3.71508	0.0187367	transcriptional regulatory protein (Whib-like), WhiB5
MMARE11_33800	-2.87603	0.0188515	conserved hypothetical secreted protein
MMARE11_42560	-1.48915	0.0188677	conserved transmembrane transport protein MmpL1_1
MMARE11_35980	-1.66623	0.0188838	non-ribosomal peptide synthetase
MMARE11_47850	-1.71421	0.0190798	conserved transmembrane transport protein MmpL family
MMARE11_50440	1.36753	0.0192203	aspartate-semialdehyde dehydrogenase Asd
MMARE11_32230	-2.98277	0.0192674	pyruvate dehydrogenase E1 component (beta subunit)
MMARE11_42560	-1.34951	0.0194778	conserved transmembrane transport protein-MmpL family
MMARE11_32540	-2.73317	0.0195726	apolipoprotein n-acyltransferase, Lnt
MMARE11_06410	-2.7316	0.0196429	gamma-butyrobetaine hydroxylase, TauD_1
MMARE11_21900	1.33765	0.0196572	conserved ATP-binding protein ABC transporter
MMARE11_34990	-1.63348	0.0196616	PPE family protein
MMARE11_15120	-2.49109	0.0196781	O-methyltransferase
MMARE11_14010	-2.65001	0.01968	conserved hypothetical protein
MMARE11_42580	-2.09316	0.019794	hypothetical protein
MMARE11_29030	1.11121	0.0198148	20-beta-hydroxysteroid dehydrogenase FabG3_1
MMARE11_01340	-2.72742	0.0198309	conserved hypothetical secreted protein
MMARE11_11140	1.089	0.0199132	conserved lipoprotein, LpqD
MMARE11_19080	1.26089	0.0199958	conserved hypothetical membrane protein
MMARE11_14595	-3.55466	0.0200615	conserved secreted protein
MMARE11_28870	-1.65159	0.0201496	conserved hypothetical oxidoreductase
MMARE11_31170	-3.54913	0.0203264	mevalonate kinase, Erg12
MMARE11_37760	-2.17472	0.020413	cytochrome P450 269A1 Cyp269A1
MMARE11_44860	1.09186	0.0204627	cold shock-like protein B CspB
MMARE11_39590	-1.95745	0.0204963	PE-PGRS family protein
MMARE11_25190	-2.30119	0.0205644	conserved hypothetical protein
MMARE11_46860	-1.84483	0.0206403	transposase for ISMyma06
MMARE11_38150	-2.51552	0.0206432	cytochrome P450 187A5 Cyp187A5
MMARE11_50300	-2.63054	0.0206974	PE-PGRS family protein, PE_PGRS9_2
MMARE11_43190	-1.94966	0.0210056	glycosyltransferase
MMARE11_19050	1.26625	0.0210625	conserved protein
MMARE11_01270	-2.29181	0.0210983	conserved hypothetical protein
MMARE11_38000	-2.0257	0.0211801	acyl-CoA dehydrogenase
MMARE11_35300	1.19607	0.0212228	conserved hypothetical protein
MMARE11_01660	-1.76653	0.0214846	MCE-family protein Mce6C
MMARE11_23860	1.10105	0.0216368	glutamate N-acetyltransferase ArgJ
MMARE11_51790	-1.65839	0.021642	conserved hypothetical membrane protein
MMARE11_44660	-1.68484	0.0216467	monooxygenase
MMARE11_51660	-2.27978	0.0218127	conserved hypothetical protein
MMARE11_45820	-2.03089	0.0218863	short-chain type dehydrogenase/reductase
MMARE11_45200	-2.15072	0.0218933	cytochrome P450 150A6 Cyp150A6
MMARE11_02860	1.15076	0.0220102	conserved hypothetical secreted protein
MMARE11_08270	1.90388	0.0222232	conserved hypothetical membrane protein
MMARE11_41690	-2.92005	0.0222493	conserved hypothetical protein
MMARE11_34020	-2.60111	0.022269	pyruvate dehydrogenase E1 component (beta subunit)
MMARE11_37990	-1.94331	0.0225951	acyl-CoA dehydrogenase
MMARE11_40720	-2.22177	0.0226855	monophosphatase CysQ-like protein
MMARE11_21880	1.45545	0.0229099	conserved protein
MMARE11_28030	-2.66829	0.0229718	MCE-family protein Mce3B
MMARE11_01750	1.42972	0.0229793	PPE family protein
MMARE11_18650	-2.43035	0.0230646	conserved hypothetical protein
MMARE11_52830	1.38556	0.0232619	Esx-1 secreted protein, EspB
MMARE11_45780	-1.4762	0.0235538	integral membrane transporter
MMARE11_21950	1.74831	0.0236353	acyl-CoA dehydrogenase FadE5
MMARE11_32640	-2.41655	0.0238989	conserved hypothetical membrane protein
MMARE11_24510	-1.86839	0.0239832	conserved hypothetical protein
MMARE11_01250	-2.02911	0.0240007	conserved hypothetical protein
MMARE11_03580	-2.02897	0.0240107	conserved hypothetical protein
MMARE11_41390	-2.15883	0.0240521	aldehyde dehydrogenase NAD dependent AldA_2
MMARE11_02260	-2.2409	0.0242904	PE-PGRS family protein
MMARE11_47320	-2.11331	0.0243844	conserved hypothetical protein
MMARE11_15950	-1.93493	0.0244173	penicillin-binding protein
MMARE11_12480	0.951196	0.024444	transcriptional regulatory protein Whib-like WhiB2
MMARE11_11130	1.04925	0.0245308	short-chain dehydrogenase, AcrA1
MMARE11_19440	1.04955	0.02461	conserved hypothetical protein
MMARE11_03620	-1.99071	0.0247134	cytochrome P450 191A3 Cyp191A3
MMARE11_01680	-1.85709	0.0248414	MCE-family lipoprotein Mce6E
MMARE11_01590	-1.86768	0.0250394	conserved membrane protein
MMARE11_50150	-2.21605	0.0250446	integral membrane transport protein
MMARE11_43400	1.08055	0.0252236	pterin-4-alpha-carbinolamine dehydratase MoaB2
MMARE11_05860	1.46416	0.0252404	chaperone protein DnaK
MMARE11_42530	-1.86264	0.0254346	dehydrogenase fad flavoprotein Gmc oxidoreductase
MMARE11_29740	-1.33074	0.0256872	RNA polymerase sigma factor, SigC
MMARE11_17390	-3.54374	0.0258463	conserved hypothetical protein
MMARE11_02040	-1.95907	0.025916	conserved hypothetical protein
MMARE11_06540	-2.13105	0.0259582	conserved membrane protein MmpS1_1
MMARE11_07190	-2.85246	0.0259708	conserved hypothetical protein
MMARE11_06610	-2.3149	0.0263235	conserved hypothetical protein
MMARE11_49410	1.04204	0.0263319	EsaT-6 like protein EsxN_3
MMARE11_28350	1.12105	0.0263795	catalase-peroxidase-peroxynitritase T KatG
MMARE11_08190	-1.96481	0.0267011	amino acid permease
MMARE11_36420	-2.24377	0.0271072	conserved hypothetical membrane metal-binding protein ComEC
MMARE11_05270	-2.19972	0.0271585	carbohydrate kinase
MMARE11_26700	1.57344	0.0273104	conserved hypothetical protein
MMARE11_28050	-2.40322	0.0275102	MCE-family protein Mce3D
MMARE11_01360	1.03267	0.0275431	acyl-CoA dehydrogenase FadE25_2
MMARE11_44320	1.05818	0.0275472	conserved hypothetical protein
MMARE11_06200	1.045	0.0276022	Mg2+ transport transmembrane protein MgtE
MMARE11_36640	-1.42356	0.0276334	adenylate or guanylate cyclase
MMARE11_35570	1.34538	0.0276517	conserved hypothetical protein
MMARE11_21870	1.2089	0.0277926	transcriptional regulatory protein
MMARE11_42610	1.22307	0.0278076	hypothetical membrane protein
MMARE11_06400	-1.85628	0.0280548	conserved hypothetical protein
MMARE11_33350	-1.83058	0.02808	PE family protein
MMARE11_42970	-2.14416	0.0281266	cytochrome P450 135B3 Cyp135B3
MMARE11_52520	-2.39392	0.0281495	conserved hypothetical transmembrane protein
MMARE11_35980	-1.4318	0.0282127	non-ribosomal peptide synthetase
MMARE11_30210	-1.33925	0.0282603	polyketide synthase Pks9
MMARE11_44460	-1.25477	0.0283508	metal cation transporter ATPase p-type CtpE
MMARE11_27900	-1.23852	0.0283549	conserved hypothetical membrane protein
MMARE11_01630	-1.97139	0.0284387	conserved hypothetical integral membrane protein YrbE6B
MMARE11_07840	-1.33132	0.0285447	carbon monoxyde dehydrogenase (medium chain), CoxM_1
MMARE11_33010	-1.83228	0.0287034	conserved hypothetical protein
MMARE11_28360	1.2709	0.0287162	ferric uptake regulation protein FurA
MMARE11_19960	-3.36304	0.0290802	PE-PGRS family protein
MMARE11_03240	-1.84442	0.0290818	conserved protein
MMARE11_48090	-2.17381	0.0291252	PE-PGRS family protein
MMARE11_28880	-1.63646	0.0293184	conserved transmembrane transport protein
MMARE11_41720	-2.37669	0.029377	conserved hypothetical alanine and proline rich protein
MMARE11_22730	-1.2532	0.0294453	glycosyl transferase
MMARE11_03270	1.01706	0.0297415	O-Methyltransferase
MMARE11_29120	1.80366	0.0297457	conserved protein
MMARE11_10500	1.04013	0.02993	D-serine/D-alanine/glycine transporter, CycA
MMARE11_09330	-1.45691	0.0299737	amidase, AmiD
MMARE11_45460	-2.26457	0.0299823	acyl-CoA dehydrogenase
MMARE11_52560	-2.78606	0.0300795	conserved hypothetical protein
MMARE11_26300	-2.96717	0.030339	PE-PGRS family protein, PE_PGRS34_1
MMARE11_34540	-1.40077	0.0305871	conserved hypothetical membrane protein
MMARE11_01787	1.05077	0.0309478	hypothetical protein
MMARE11_08690	-1.21705	0.0311163	lantibiotic modifying enzyme
MMARE11_21570	-1.58259	0.0312444	PE-PGRS family protein, PE16
MMARE11_38300	-2.46172	0.0313518	enoyl-CoA hydratase EchA11_1
MMARE11_49710	-2.40951	0.0314094	conserved hypothetical protein
MMARE11_49680	-3.43471	0.0314864	conserved hypothetical alanine-rich membrane protein
MMARE11_48620	-1.3504	0.0315605	PPE family protein
MMARE11_41430	-1.49229	0.031623	transcriptional regulatory protein (probably TetR-family)
MMARE11_47310	-1.21785	0.0317187	molybdopterin biosynthesis protein, MoeY
MMARE11_33700	-1.66871	0.0317459	conserved hypothetical protein
MMARE11_20750	1.03889	0.0319366	conserved hypothetical protein
MMARE11_32460	1.00333	0.0319501	conserved hypothetical protein
MMARE11_03610	-2.18055	0.0319663	conserved hypothetical protein
MMARE11_22400	-1.36289	0.0319942	conserved hypothetical protein
MMARE11_18470	-1.40709	0.0320202	acyl-CoA dehydrogenase FadE21
MMARE11_47120	1.0169	0.0320954	conserved hypothetical regulatory protein
MMARE11_34390	-1.41533	0.0322332	transcriptional regulatory protein (LuxR-family)
MMARE11_01570	-2.17461	0.0324662	conserved membrane protein
MMARE11_38270	-1.88232	0.0324989	enoyl-CoA hydratase, EchA4_2
MMARE11_43960	-1.24446	0.0325717	divalent cation-transport integral membrane protein MntH
MMARE11_51170	-2.12704	0.0329182	osmoprotectant (glycine betaine/carnitine/choline/L-proline) transport integral membrane protein ABC transporter ProW
MMARE11_38310	-2.63641	0.0329592	enoyl-CoA hydratase EchA16_1
MMARE11_01550	-1.76442	0.0330196	conserved protein
MMARE11_38130	-2.63258	0.0332138	conserved hypothetical protein
MMARE11_18130	-1.62395	0.0332622	cobyrinic acid a,C-diamide synthase CobB
MMARE11_14730	-2.43632	0.0333317	conserved hypothetical protein
MMARE11_35390	-1.51723	0.0334968	tryptophan halogenase
MMARE11_43280	-2.21865	0.033699	glycosyl transferase
MMARE11_16290	1.09233	0.0337742	acetolactate synthase (large subunit) IlvB1
MMARE11_47890	0.994567	0.0337786	conserved hypothetical secreted protein
MMARE11_21350	1.02155	0.0337946	transcriptional regulatory protein
MMARE11_13840	0.993571	0.0341453	PPE family protein
MMARE11_52380	-1.93521	0.0342187	conserved hypothetical membrane protein
MMARE11_42570	-1.42485	0.034219	cytochrome P450 138B1 Cyp138B1
MMARE11_13450	-1.80554	0.0343154	transcriptional regulatory protein
MMARE11_45930	-1.40746	0.034357	transcriptional regulatory protein (LuxR-family)
MMARE11_42560	-1.37116	0.0351373	conserved transmembrane transport protein, MmpL5_5
MMARE11_38080	-2.48861	0.0351836	Dehydrogenase/decarboxylase protein
MMARE11_30040	1.0296	0.0352034	conserved protein
MMARE11_14360	-1.97942	0.0354879	conserved hypothetical protein
MMARE11_16310	1.11537	0.0355349	ketol-acid reductoisomerase IlvC
MMARE11_23410	1.1025	0.0355629	conserved hypothetical membrane protein
MMARE11_37860	-2.48367	0.0356292	acyl-CoA dehydrogenase
MMARE11_05050	-1.29287	0.0356687	conserved protein
MMARE11_16890	-1.17671	0.0356738	daunorubicin-DIM-transport integral membrane protein ABC transporter DrrC
MMARE11_05280	-1.75134	0.0356914	mannitol dehydrogenase
MMARE11_27980	-3.35998	0.0357625	conserved hypothetical protein
MMARE11_07180	-1.97348	0.0360673	cyclopropane-fatty-acyl-phospholipid synthase UfaA1
MMARE11_22610	-1.43117	0.0361483	SAM-dependent methyltransferase
MMARE11_28490	-2.25143	0.0361837	PPE family protein
MMARE11_01150	-1.88637	0.0362937	oxidoreductase
MMARE11_34040	-2.8743	0.036304	conserved hypothetical protein
MMARE11_46130	1.1575	0.0363603	two-component sensor kinase
MMARE11_25900	1.84532	0.0363696	PE family protein, PE19_1
MMARE11_28570	-1.51001	0.0365062	fatty-acid-CoA ligase FadD9_1
MMARE11_27040	1.21264	0.0365368	conserved hypothetical membrane protein
MMARE11_45500	-1.52177	0.0365698	membrane-associated phospholipase C 2 PlcB_6
MMARE11_27950	-1.75149	0.036618	aldehyde dehydrogenase
MMARE11_14800	-1.85533	0.03671	conserved hypothetical membrane protein
MMARE11_44690	-1.51954	0.0368345	conserved hypothetical exported protein
MMARE11_46280	-1.74767	0.0370361	methylmalonyl-CoA mutase beta subunit, McmA2a
MMARE11_05290	-2.46496	0.0372108	PE-PGRS family protein
MMARE11_45700	-1.73544	0.0374208	metal-dependent amidohydrolase
MMARE11_31130	-1.99776	0.0374289	hydroxymethylglutaryl-coenzyme A synthase, PksG
MMARE11_32480	0.99446	0.0379275	conserved hypothetical protein
MMARE11_14320	-1.71787	0.037971	conserved hypothetical protein
MMARE11_04350	-1.67439	0.0380852	methyltransferase
MMARE11_43000	-2.0703	0.0381733	dehydrogenase
MMARE11_03650	-2.67382	0.0384157	short chain dehydrogenase
MMARE11_39710	-1.54523	0.0384272	acyl-CoA dehydrogenase FadE3_2
MMARE11_33980	1.44872	0.0384712	hypothetical protein
MMARE11_26440	1.80412	0.0385051	urease beta subunit UreB
MMARE11_45470	-3.20577	0.0386348	conserved hypothetical protein
MMARE11_01540	-1.38855	0.0388054	glutamate decarboxylase
MMARE11_45210	-3.30775	0.0389871	hypothetical protein
MMARE11_32620	1.01461	0.0394874	flavin-containing monoamine oxidase AofH_1
MMARE11_22450	-1.22315	0.039493	conserved hypothetical transmembrane protein
MMARE11_27310	-1.61062	0.039709	conserved hypothetical protein
MMARE11_49430	-2.05134	0.0400777	PPE family protein
MMARE11_45720	-1.60704	0.0401355	dioxygenase
MMARE11_13260	-1.46656	0.0404776	ATP-dependent DNA helicase
MMARE11_46690	-1.78353	0.0406601	phosphate-transport integral membrane ABC transporter, PstA
MMARE11_40770	-1.6944	0.0407012	conserved hypothetical protein
MMARE11_39440	1.03533	0.0408255	conserved hypothetical protein
MMARE11_28080	-2.64203	0.0410438	conserved Mce associated membrane protein
MMARE11_28830	-1.89543	0.0412642	Zn-dependent alcohol dehydrogenase
MMARE11_16720	-1.15181	0.0412928	formyltetrahydrofolate deformylase PurU
MMARE11_47210	0.998339	0.0413134	Zn-dependent alcohol dehydrogenase, AdhX
MMARE11_14630	-1.61316	0.0413616	PPE family protein
MMARE11_40150	-1.45308	0.0414195	sugar-transport ATP-binding protein ABC transporter SugC
MMARE11_47220	0.960914	0.04159	aldehyde dehydrogenase
MMARE11_04110	-1.20648	0.041813	conserved hypothetical protein
MMARE11_32810	-2.3361	0.0418374	transposase, ISMyma01_aa1-like protein
MMARE11_15800	-1.5928	0.0418928	formate hydrogenase HycE
MMARE11_36680	0.954166	0.041954	cytochrome P450 268A2 Cyp268A2
MMARE11_34830	0.956732	0.0419571	conserved hypothetical proline-rich protein
MMARE11_50890	-1.73559	0.0420793	multi-functional enzyme with acyl-CoA-reductase activity AcrA1_1
MMARE11_31570	1.27965	0.0421462	branched-chain amino acid transaminase IlvE
MMARE11_41410	-3.25364	0.0425185	hypothetical protein
MMARE11_00440	-1.69191	0.0425312	conserved hypothetical protein
MMARE11_45590	-1.71378	0.0428336	3-ketoacyl-CoA thiolase
MMARE11_44990	0.958157	0.042842	conserved protein
MMARE11_09980	-1.38641	0.0435471	arylsulfatase AtsA_1
MMARE11_15020	-2.26957	0.0436007	conserved hypothetical membrane protein
MMARE11_46250	-1.9751	0.0439578	acyl-CoA transferase
MMARE11_25960	1.03884	0.0439742	conserved protein
MMARE11_33840	-1.75553	0.0440132	haloalkane dehalogenase
MMARE11_12940	-2.26656	0.0440241	conserved hypothetical protein
MMARE11_27640	-1.40291	0.0444434	metal-dependent hydrolase
MMARE11_22410	-1.16075	0.0444721	conserved hypothetical transmembrane protein
MMARE11_32790	-1.55016	0.0445347	PPE family protein
MMARE11_35140	-1.76967	0.0447882	conserved hypothetical protein
MMARE11_32220	-1.72735	0.0450435	hypothetical protein
MMARE11_12950	-2.28845	0.0451994	conserved hypothetical alanine rich protein
MMARE11_33790	-1.13984	0.0452947	PE family protein
MMARE11_19210	1.02243	0.0454306	conserved hypothetical hydrolase
MMARE11_37490	-1.54293	0.0455095	Mce protein, Mce5A
MMARE11_47810	-1.67672	0.0455706	8-amino-7-oxononanoate synthase BioF2
MMARE11_49570	-2.15501	0.0456441	PE-PGRS family protein, PE_PGRS15
MMARE11_26290	-1.1549	0.0456736	glycine dehydrogenase GcvB_1
MMARE11_42330	-1.59528	0.0457249	conserved protein
MMARE11_45310	-1.56248	0.0458713	MCE-family protein
MMARE11_43150	-1.43236	0.0460415	PPE family protein
MMARE11_40330	-1.55275	0.0461111	tetronasin-transport integral membrane protein ABC transporter
MMARE11_05890	0.979276	0.0463995	heat shock protein transcriptional repressor HspR (MerR family)
MMARE11_11430	1.0493	0.046499	methyltransferase
MMARE11_10360	1.07986	0.0465106	methylmalonate semialdehyde dehydrogenase, MmsA
MMARE11_03340	-1.48269	0.0466444	PE family protein
MMARE11_44290	-1.52753	0.0467663	PPE family protein
MMARE11_22000	0.950258	0.0468023	enoyl-CoA hydratase, EchA12
MMARE11_02280	-1.7655	0.0471762	methyltransferase/methylase
MMARE11_42560	-1.14258	0.0471816	conserved transmembrane transport protein MmpL4_5
MMARE11_52960	-1.59443	0.047213	lipoprotein LppJ
MMARE11_01300	1.31825	0.047488	conserved hypothetical protein
MMARE11_46210	-1.86886	0.0476751	acyl-CoA dehydrogenase
MMARE11_29890	0.930861	0.0476773	conserved hypothetical protein
MMARE11_01650	-1.61658	0.0479082	MCE-family protein Mce6B
MMARE11_17990	0.934049	0.047913	nickel cation-binding GTPase, HypB
MMARE11_33070	1.16451	0.047954	maleate cis-trans isomerase
MMARE11_31150	-2.17249	0.0480589	phosphomevalonate kinase
MMARE11_25440	-1.42804	0.048368	fatty-acid-CoA ligase FadD1
MMARE11_05020	-1.10756	0.048617	PPE family protein, PPE4
MMARE11_43170	-1.50589	0.0487377	conserved hypothetical membrane protein
MMARE11_21160	-1.09055	0.0488834	pyrimidine operon regulatory protein PyrR
MMARE11_01610	-1.44677	0.0490717	polyketide synthase Pks16_1
MMARE11_03600	-2.55575	0.0490791	conserved hypothetical protein
MMARE11_28560	-1.80345	0.0490853	conserved hypothetical protein
MMARE11_07400	-1.14506	0.049225	transcriptional regulatory protein
MMARE11_45610	-1.66436	0.0493324	cytochrome P450 190A3 Cyp190A3
MMARE11_50740	1.14526	0.0494077	conserved protein
MMARE11_43010	-1.92886	0.0494264	alternative RNA polymerase sigma factor
MMARE11_19310	1.06384	0.0495045	conserved hypothetical protein
MMARE11_45970	-1.39702	0.0495911	cysteine synthase a CysK2
