# Supplementary material for: Integrated transcriptomic and proteomic analysis of pathogenic mycobacteria and their esx-1 mutants reveal secretion-dependent regulation of ESX-1 substrates and WhiB6 as a transcriptional regulator
Source: PLoS One. 2019 Jan 23;14(1):e0211003. doi: 10.1371/journal.pone.0211003 (PMC6343904; doi:10.1371/journal.pone.0211003)
Supplement: S5 Table — (XLSX) [file pone.0211003.s005.xlsx]

## Sheet: E11_E11_INT (S5)
Complete list of genes of which expression is significantly changed in M. marinum wild-type strain during infection of macrophages vs growth in 7H9 culture medium. P<0.05
Gene ID	foldChange	log2FoldChange	pval	Product
MMARE11_35620	0.0350916	-4.83273	8.69e-12	EsaT-6 like protein EsxP_2"
MMARE11_46400	0.0364238	-4.77898	1.95e-10	conserved transmembrane transport protein
MMARE11_46360	0.019619	-5.6716	1.32e-09	phytoene dehydrogenase CrtI"
MMARE11_46350	0.0122847	-6.34699	1.91e-09	geranylgeranyl pyrophosphate synthase CrtE"
MMARE11_35630	0.0312808	-4.99858	2.37e-09	conserved hypothetical protein"
MMARE11_52750	0.111793	-3.1611	3.5e-09	Esat-6 like protein EsxB"
MMARE11_08940	0.0268003	-5.22161	3.76e-09	conserved hypothetical protein"
MMARE11_35610	0.0777065	-3.68582	3.8e-09	EsaT-6 like protein EsxN_3"
MMARE11_49940	0.0555432	-4.17025	4.89e-09	transcriptional regulatory protein Whib-like
MMARE11_01780	0.0969223	-3.36703	7.15e-09	conserved hypothetical EsxB-like protein,
MMARE11_29140	7.31772	2.87139	1.02e-08	molecular chaperone (small heat shock protein)"
MMARE11_52760	0.147869	-2.7576	1.65e-08	6 kDa early secretory antigenic target EsxA
MMARE11_51340	0.0753581	-3.73009	5.97e-08	19 kDa lipoprotein antigen precursor LpqH"
MMARE11_46370	0.0251998	-5.31044	8.71e-08	phytoene synthase, CrtB"
MMARE11_52830	0.131843	-2.92311	1.05e-07	Esx-1 secreted protein, EspB"
MMARE11_42680	0.0983439	-3.34602	1.37e-07	EsaT-6 like protein EsxP"
MMARE11_01750	0.144204	-2.79382	1.44e-07	PPE family protein"
MMARE11_13670	0.079031	-3.66144	1.68e-07	PPE family protein"
MMARE11_03730	0.121832	-3.03704	1.99e-07	conserved hypothetical integral membrane protein
MMARE11_12800	48.8303	5.60971	3.02e-07	oxidoreductase"
MMARE11_06730	0.144112	-2.79474	3.98e-07	conserved hypothetical membrane protein"
MMARE11_52330	0.0948974	-3.39749	4.86e-07	conserved hypothetical protein"
MMARE11_37690	0.208156	-2.26426	4.97e-07	fatty acid synthase Fas"
MMARE11_46380	0.0127027	-6.29872	6.46e-07	lycopene cyclase, CrtYc"
MMARE11_01770	0.0863346	-3.53392	7.16e-07	6 kDa culture filtrate antigen EsxA_1 (early
MMARE11_04850	0.127353	-2.97309	8.48e-07	fatty-acid-CoA ligase FadD2"
MMARE11_16810	0.200399	-2.31906	8.73e-07	polyketide synthase Pks15/1"
MMARE11_14280	0.0717072	-3.80174	1.09e-06	conserved hypothetical membrane protein"
MMARE11_06740	0.158489	-2.65755	1.16e-06	conserved hypothetical membrane protein"
MMARE11_03770	0.188464	-2.40764	2.33e-06	MCE-family protein Mce1C"
MMARE11_12810	69.7061	6.12321	2.9e-06	linoleoyl-CoA desaturase, DesA3"
MMARE11_28350	0.119187	-3.06871	3.13e-06	catalase-peroxidase-peroxynitritase T KatG"
MMARE11_03740	0.173139	-2.52999	3.21e-06	conserved hypothetical integral membrane protein
MMARE11_51880	0.14301	-2.80581	3.51e-06	secreted Mpt51/Mpb51 antigen protein FbpD"
MMARE11_29170	0.100804	-3.31038	3.71e-06	ferredoxin FdxA_2"
MMARE11_12650	0.191635	-2.38357	3.73e-06	two-component sensory transduction
MMARE11_09660	0.275583	-1.85944	4.4e-06	iron-regulated elongation factor Ef-tu, Tuf"
MMARE11_35710	0.069514	-3.84655	6.44e-06	PPE family protein"
MMARE11_35720	0.069514	-3.84655	6.56e-06	PPE family protein"
MMARE11_35670	0.121639	-3.03932	7.03e-06	EsaT-6 like protein EsxN_4"
MMARE11_35680	0.121639	-3.03932	7.04e-06	EsaT-6 like protein EsxN_5"
MMARE11_51810	0.0193048	-5.6949	7.15e-06	conserved hypothetical membrane protein"
MMARE11_09470	0.273402	-1.8709	7.42e-06	DNA-directed RNA polymerase, beta chain, RpoC"
MMARE11_52660	0.190815	-2.38975	8.9e-06	conserved hypothetical protein"
MMARE11_10070	0.169873	-2.55747	1.04e-05	50S ribosomal protein L6, RplF"
MMARE11_35690	0.0468779	-4.41495	1.2e-05	EsaT-6 like protein EsxP_3"
MMARE11_35700	0.0468779	-4.41495	1.26e-05	EsaT-6 like protein EsxP_4"
MMARE11_42690	0.074898	-3.73893	1.26e-05	EsaT-6 like protein EsxN_1"
MMARE11_20170	0.0528014	-4.24328	1.33e-05	conserved hypothetical protein"
MMARE11_34620	0.115865	-3.10948	1.38e-05	PPE family protein, PPE5"
MMARE11_16470	0.198	-2.33643	1.52e-05	DNA-binding protein Hu, HupB"
MMARE11_39000	0.253487	-1.98002	1.67e-05	ATP synthase delta chain AtpH"
MMARE11p_00900	25.481	4.67135	1.71e-05	hypothetical protein"
MMARE11_49220	0.282694	-1.82269	1.73e-05	ATP-dependent protease ATP-binding subunit
MMARE11_10060	0.18901	-2.40346	1.75e-05	30S ribosomal protein S8, RpsH"
MMARE11_46390	0.0351969	-4.82841	1.77e-05	lycopene cyclase, CrtYd"
MMARE11_33990	0.109274	-3.19398	2.8e-05	conserved hypothetical protein"
MMARE11_25960	0.188406	-2.40808	2.85e-05	conserved protein"
MMARE11_52820	0.222894	-2.16557	2.9e-05	conserved hypothetical protein"
MMARE11_21100	0.109582	-3.18991	2.97e-05	conserved lipoprotein LprF"
MMARE11_22620	0.247224	-2.01611	3.16e-05	probable polyketide synthase Pks5"
MMARE11_32410	0.223726	-2.16019	3.2e-05	acetyl/propionyl-CoA carboxylase (beta subunit)
MMARE11_52740	0.256002	-1.96577	3.21e-05	PPE family protein"
MMARE11_01760	0.0927121	-3.4311	3.73e-05	10 kDa culture filtrate antigen EsxB_1"
MMARE11_52670	0.218874	-2.19183	3.98e-05	conserved hypothetical protein"
MMARE11_32390	0.287216	-1.79979	3.99e-05	3-oxoacyl-[acyl-carrier protein] synthase 1
MMARE11_34140	0.0600819	-4.05693	4.01e-05	conserved hypothetical protein"
MMARE11_16050	0.22104	-2.17762	4.32e-05	electron transfer flavoprotein (beta-subunit)
MMARE11_21790	0.136576	-2.87222	4.37e-05	trehalose-6-phosphate phosphatase OtsB1"
MMARE11_41570	0.117059	-3.09469	4.77e-05	6-phosphogluconate dehydrogenase,
MMARE11_08660	0.0837146	-3.57838	4.79e-05	trypsin-like serine protease"
MMARE11_31400	0.224639	-2.15432	4.86e-05	ubiquinol-cytochrome C reductase QcrC"
MMARE11_25700	0.181681	-2.46052	6.17e-05	conserved hypothetical protein"
MMARE11_13550	0.135287	-2.88591	6.24e-05	non-heme haloperoxidase Hpx"
MMARE11_13770	0.196954	-2.34407	6.41e-05	NADH dehydrogenase I (chain G) NuoG
MMARE11_13700	0.185947	-2.42703	6.81e-05	NADH dehydrogenase I (chain N) NuoN
MMARE11_26250	0.257908	-1.95507	6.89e-05	conserved protein"
MMARE11_24960	0.0622555	-4.00565	7.12e-05	conserved hypothetical protein"
MMARE11_30900	0.230875	-2.11482	7.12e-05	cell division protein FtsZ"
MMARE11_29720	0.0532802	-4.23026	7.35e-05	conserved membrane transport protein, MmpS4_1"
MMARE11_10990	0.177628	-2.49307	8.72e-05	cholesterol oxidase precursor ChoD"
MMARE11_34190	0.312554	-1.67782	9.04e-05	hypothetical protein"
MMARE11_02940	0.205575	-2.28227	9.05e-05	serine protease PepA"
MMARE11_13330	26.5709	4.73178	9.67e-05	transcriptional regulatory protein Whib-like
MMARE11_10840	0.257812	-1.95561	0.00011113	60 kDa chaperone (GroEL1)"
MMARE11_04980	4.406	2.13947	0.000115305	conserved protein"
MMARE11_22060	0.274451	-1.86538	0.000132643	mycobacterial invasion and intracellular
MMARE11_09460	0.342527	-1.54571	0.000141756	DNA-directed RNA polymerase, beta subunit, RpoB"
MMARE11_07210	4.72599	2.24062	0.000146099	conserved transmembrane transport protein
MMARE11_26490	3.88637	1.95843	0.000149024	NADH dehydrogenase Ndh"
MMARE11_49230	0.285635	-1.80775	0.000157445	iron-regulated Lsr2 protein precursor"
MMARE11_32400	0.199708	-2.32403	0.000170608	3-oxoacyl-[acyl-carrier protein] synthase 2
MMARE11_21280	8.2426	3.0431	0.0001737	conserved hypothetical secreted protein"
MMARE11_36120	0.0541574	-4.2067	0.000175906	conserved hypothetical protein"
MMARE11_33140	0.071131	-3.81338	0.000176344	NADH-dependent glutamate synthase (small
MMARE11_07000	48.1374	5.58909	0.000180308	MFS transporter"
MMARE11_22080	0.224975	-2.15216	0.000200004	transcriptional regulatory protein, MoxR1"
MMARE11_23820	0.291378	-1.77904	0.000201618	PE-PGRS family protein"
MMARE11_10650	0.244749	-2.03063	0.000202541	ribosomal protein S9, RpsI"
MMARE11_06910	0.121173	-3.04486	0.000204772	transmembrane protein"
MMARE11_43750	0.0870463	-3.52207	0.000209872	PE-PGRS family protein"
MMARE11_51890	0.358678	-1.47924	0.000212658	secreted antigen 85-A FbpA"
MMARE11_16870	0.348471	-1.52089	0.000217824	multifunctional mycocerosic acid synthase
MMARE11_35980	6.75076	2.75505	0.000219426	non-ribosomal peptide synthetase MbtE"
MMARE11_13780	0.171344	-2.54503	0.000220124	NADH dehydrogenase I (chain F) NuoF
MMARE11_13320	5.56055	2.47523	0.000221239	hypothetical protein"
MMARE11_49420	0.0826613	-3.59664	0.000227988	EsaT-6 like protein EsxP_1"
MMARE11_36180	0.152884	-2.70949	0.00022975	3'-phosphoadenosine 5'-phosphosulfate reductase
MMARE11_22770	0.195899	-2.35182	0.000232704	conserved polyketide synthase associated protein
MMARE11_47950	0.342527	-1.54571	0.000236501	MCE-family protein Mce4C"
MMARE11_13720	0.182423	-2.45464	0.000236611	NADH dehydrogenase I (chain L) NuoL
MMARE11_11440	0.190934	-2.38885	0.000238834	homoserine O-acetyltransferase MetA"
MMARE11_23500	8.50127	3.08768	0.000241839	conserved hypothetical membrane protein"
MMARE11_50540	0.1685	-2.56918	0.000243226	recombination protein RecR"
MMARE11_09420	3.56007	1.83191	0.000251531	50S ribosomal protein L7/L12, RplL"
MMARE11_26260	0.242522	-2.04382	0.00025161	conserved hypothetical regulatory protein"
MMARE11_40280	0.219468	-2.18792	0.000255116	alternative RNA polymerase sigma factor SigE"
MMARE11_45020	0.28214	-1.82552	0.000256657	fatty oxidation protein FadB"
MMARE11_39100	0.258771	-1.95025	0.000256732	transcription termination factor Rho"
MMARE11_37200	0.174917	-2.51525	0.000258502	'tRNA-Arg(tct)'"
MMARE11_03800	0.279916	-1.83693	0.000263597	MCE-family protein Mce1F"
MMARE11_46540	7.58165	2.92251	0.000266395	ATP-dependent RNA helicase, RhlE1"
MMARE11_52650	0.231536	-2.11069	0.000269259	conserved hypothetical transmembrane protein"
MMARE11_41460	61.0696	5.93238	0.000271777	5-methyltetrahydropteroyltriglutamate--homocysteine
MMARE11_13820	0.152109	-2.71682	0.000273437	NADH dehydrogenase I (chain B) NuoB
MMARE11_03760	0.291907	-1.77642	0.000273579	MCE-family protein Mce1B"
MMARE11_12820	7.76794	2.95753	0.000279469	linoleoyl-CoA desaturase, DesA3_1"
MMARE11_50550	0.271615	-1.88037	0.000281293	conserved protein"
MMARE11_38970	0.34712	-1.52649	0.000282712	ATP synthase beta chain AtpD"
MMARE11_51350	0.219554	-2.18735	0.000282794	two-component sensor kinase TcrY"
MMARE11_03720	0.274348	-1.86592	0.000289792	fatty-acid-CoA ligase FadD5"
MMARE11_49030	0.261614	-1.93449	0.000290043	carbonic anhydrase"
MMARE11_29710	0.170923	-2.54858	0.000291884	conserved transmembrane transport protein,
MMARE11_40390	0.228023	-2.13275	0.000291884	conserved protein"
MMARE11_25850	0.329155	-1.60316	0.000291884	conserved FtsK/SpoIIIE family protein"
MMARE11_12480	0.307954	-1.69921	0.00029358	transcriptional regulatory protein Whib-like
MMARE11_00130	8.3616	3.06378	0.000299184	conserved hypothetical membrane protein"
MMARE11_47920	0.263867	-1.92212	0.000301072	MCE-family protein Mce4F"
MMARE11_04990	5.12167	2.35662	0.000305411	conserved membrane protein"
MMARE11_33170	0.158527	-2.6572	0.000305411	pyruvate dikinase"
MMARE11_25390	0.179946	-2.47436	0.000310241	putative signal-transduction protein containing
MMARE11_13760	0.179498	-2.47796	0.000311252	NADH dehydrogenase I (chain H) NuoH
MMARE11_09450	0.335481	-1.5757	0.000312	ribonucleotide-transport ATP-binding protein ABC
MMARE11_25950	0.2986	-1.74371	0.000314232	EsaT-6 like protein EsxN"
MMARE11_18220	0.333987	-1.58213	0.000317919	translation initiation factor IF-2 InfB"
MMARE11_23710	0.201502	-2.31113	0.000319391	initiation factor IF-3 InfC"
MMARE11_16930	0.361143	-1.46936	0.000322145	phenolpthiocerol synthesis type-I polyketide
MMARE11_31670	0.221197	-2.1766	0.000325799	conserved hypothetical MbtH-like protein"
MMARE11_07440	0.379904	-1.39629	0.000327213	mycolic acid synthase UmaA"
MMARE11_19270	0.259662	-1.94529	0.000330929	RNA polymerase sigma factor SigB"
MMARE11_29160	0.294498	-1.76367	0.000335174	conserved membrane protein"
MMARE11_18010	5.57577	2.47917	0.00034083	high-affinity nickel permease, HoxN"
MMARE11_47960	0.185131	-2.43338	0.000346648	MCE-family protein Mce4B"
MMARE11_49620	0.32804	-1.60806	0.000347387	cold shock protein A CspA_1"
MMARE11_53130	0.136963	-2.86814	0.000347642	conserved protein"
MMARE11_15910	0.141955	-2.8165	0.000349566	conserved membrane protein"
MMARE11_22530	0.298869	-1.74241	0.000359443	conserved hypothetical protein"
MMARE11_06070	0.180806	-2.46748	0.000366972	carbon monoxyde dehydrogenase (large chain),
MMARE11_20140	0.148641	-2.75009	0.00037199	long-chain-fatty-acid-CoA ligase, FadD11_1"
MMARE11_33890	0.0641898	-3.96151	0.000372226	conserved hypothetical membrane protein"
MMARE11_40920	0.316414	-1.66012	0.000373617	low molecular weight T-cell antigen TB8.4"
MMARE11_10090	0.132214	-2.91905	0.000373921	30S ribosomal protein S5, RpsE"
MMARE11_13740	0.182458	-2.45436	0.000377269	NADH dehydrogenase I (chain J) NuoJ
MMARE11_13800	0.256093	-1.96526	0.00038092	NADH dehydrogenase I (chain D) NuoD
MMARE11_09860	0.256541	-1.96274	0.000381325	50S ribosomal protein L3 RplC"
MMARE11_33130	0.0439667	-4.50744	0.000383135	conserved hypothetical protein"
MMARE11_23560	0.405529	-1.30212	0.000385487	ribosomal protein S1 RpsA"
MMARE11_30130	0.316192	-1.66113	0.000395219	ATPase"
MMARE11_12700	0.29146	-1.77863	0.000395739	conserved protein"
MMARE11_01390	4.3598	2.12426	0.000406698	conserved protein"
MMARE11_52810	0.286391	-1.80394	0.000407356	conserved hypothetical alanine and proline rich
MMARE11_30890	0.15862	-2.65635	0.000412568	conserved membrane protein YfiH"
MMARE11_43400	0.183073	-2.44951	0.000413756	pterin-4-alpha-carbinolamine dehydratase MoaB2"
MMARE11_24820	0.289766	-1.78704	0.000413892	'RNA chaperone/anti-terminator'"
MMARE11_43410	0.245785	-2.02453	0.000421267	serine protease PepD"
MMARE11_05870	0.147243	-2.76373	0.000421267	GrpE protein (Hsp-70 cofactor)"
MMARE11_47280	0.117526	-3.08895	0.000421267	conserved protein"
MMARE11_42700	4.08315	2.02968	0.000423141	two-component transcriptional regulator TrcR"
MMARE11_25940	0.147666	-2.75959	0.000424032	EsaT-6 like protein EsxM"
MMARE11_15930	0.104025	-3.265	0.000426749	tryptophan-rich sensory protein"
MMARE11_03300	0.255597	-1.96806	0.000439003	short-chain type dehydrogenase/reductase"
MMARE11_03750	0.308605	-1.69616	0.000445353	MCE-family protein Mce1A"
MMARE11_10480	0.268136	-1.89896	0.000451344	50S ribosomal protein L17, RplQ"
MMARE11_10100	0.124932	-3.00078	0.000460196	50S ribosomal protein L30, RpmD"
MMARE11_22760	0.251835	-1.98945	0.000462631	conserved hypothetical protein"
MMARE11_07090	0.31658	-1.65936	0.000471355	60 kDa chaperonin 2 GroEL2"
MMARE11_04690	3.59515	1.84605	0.000478842	succinate dehydrogenase (membrane anchor
MMARE11_23630	0.385687	-1.3745	0.000482348	iron-regulated conserved protein"
MMARE11_10050	0.25175	-1.98994	0.000485963	30S ribosomal protein S14, RpsN"
MMARE11_35100	6.36734	2.67069	0.000492492	hypothetical protein"
MMARE11_52790	0.353456	-1.5004	0.000501172	conserved hypothetical alanine rich secreted
MMARE11_38990	0.420069	-1.2513	0.000519145	ATP synthase alpha chain AtpA"
MMARE11_15920	0.170191	-2.55478	0.000521946	DNA photolyase, PhrI"
MMARE11_03310	0.199575	-2.32499	0.0005224	quinone oxidoreductase"
MMARE11_12710	0.397472	-1.33107	0.000543767	preprotein translocase SecA1 1 subunit"
MMARE11_36040	6.93356	2.7936	0.000546344	lysine-N-oxygenase MbtG"
MMARE11_20180	0.0871275	-3.52073	0.000549261	conserved transmembrane alanine and leucine rich
MMARE11_15540	8.60144	3.10458	0.000569893	conserved hypothetical protein"
MMARE11_33950	0.183691	-2.44464	0.000579448	conserved hypothetical protein"
MMARE11_50880	0.236859	-2.0779	0.000586569	conserved hypothetical protein"
MMARE11_35450	20.8138	4.37947	0.000598873	integral membrane nitrite extrusion protein
MMARE11_07940	0.289941	-1.78617	0.000600311	uroporphyrin-III C-methyltransferase HemD"
MMARE11_07930	0.291993	-1.776	0.00060399	porphobilinogen deaminase HemC"
MMARE11_10640	0.366524	-1.44802	0.000630713	50S ribosomal protein L13, RplM"
MMARE11_10960	0.327772	-1.60924	0.000647693	inosine-5'-monophosphate (imp) dehydrogenase,
MMARE11_43620	0.271703	-1.8799	0.000649015	succinyl-CoA synthetase (alpha chain) SucD"
MMARE11_19150	0.370687	-1.43173	0.000675295	conserved transmembrane alanine and glycine rich
MMARE11_49020	0.312684	-1.67722	0.000703874	conserved membrane protein"
MMARE11_45030	0.338442	-1.56302	0.00072149	acyl-CoA thiolase FadA"
MMARE11_18910	0.354727	-1.49522	0.000739231	cell division transmembrane protein FtsK"
MMARE11_09220	0.321145	-1.6387	0.000748916	50S ribosomal protein L11, RplK"
MMARE11_10240	0.316528	-1.65959	0.00075062	conserved protein"
MMARE11_09920	0.235054	-2.08894	0.000770907	30S ribosomal protein S3, RpsC"
MMARE11_39550	0.208228	-2.26377	0.000772556	lipoprotein LprC"
MMARE11_25930	0.2314	-2.11154	0.00080764	PE family protein, PE19"
MMARE11_14320	0.135604	-2.88253	0.000808343	conserved hypothetical protein"
MMARE11_26810	8.04674	3.0084	0.000827021	conserved hypothetical protein"
MMARE11_22070	0.214535	-2.22071	0.00083528	mycobacterial invasion and intracellular
MMARE11_19310	3.17555	1.66701	0.000841771	conserved hypothetical protein"
MMARE11_17300	5.89222	2.55881	0.000870624	conserved alanine rich lipoprotein LppW"
MMARE11_25100	0.200391	-2.31911	0.000874008	PPE family protein, PPE8"
MMARE11_18230	0.236201	-2.08191	0.000893367	ribosome-binding factor a RbfA"
MMARE11_07780	0.377649	-1.40488	0.000906375	UDP-glucose 4-epimerase GalE2"
MMARE11_36850	0.349047	-1.51851	0.000935169	pyruvate:ferredoxin oxidoreductase PorB, beta
MMARE11_40650	8.8162	3.14016	0.000954382	proline dehydrogenase, PutA"
MMARE11_43630	0.401171	-1.31771	0.000960015	succinyl-CoA synthetase (beta chain) SucC"
MMARE11_03780	0.304793	-1.7141	0.000981356	MCE-family protein Mce1D"
MMARE11_35970	4.21199	2.0745	0.0010105	non-ribosomal peptide synthetase MbtF"
MMARE11_36130	8.11798	3.02112	0.001054	isochorismate synthase MbtI"
MMARE11_16720	8.10411	3.01865	0.00110687	formyltetrahydrofolate deformylase PurU"
MMARE11_42440	8.21833	3.03885	0.00112242	conserved hypothetical protein"
MMARE11_43370	4.37891	2.13057	0.00113243	conserved hypothetical serine rich protein"
MMARE11_47990	0.221801	-2.17267	0.00113271	conserved membrane protein YrbE4A"
MMARE11_43320	0.378222	-1.4027	0.00114273	conserved hypothetical transmembrane protein"
MMARE11_36110	0.285682	-1.80752	0.00115403	acyl-[acyl-carrier protein] desaturase DesA1_1"
MMARE11_22690	0.456336	-1.13183	0.00118136	hypothetical protein"
MMARE11_01790	0.255651	-1.96775	0.00119452	conserved hypothetical EsxA-like protein,
MMARE11_01800	0.255651	-1.96775	0.00122321	conserved hypothetical EsxA-like protein,
MMARE11_18530	0.437982	-1.19106	0.00123183	bifunctional protein polyribonucleotide
MMARE11_46460	20.3015	4.34352	0.00123275	conserved hypothetical transmembrane protein"
MMARE11_21270	0.331562	-1.59265	0.00124736	s-adenosylmethionine synthetase MetK"
MMARE11_11450	0.331496	-1.59294	0.0012518	O-acetylhomoserine sulfhydrylase MetC"
MMARE11_11250	0.384335	-1.37956	0.00125577	conserved hypothetical regultory protein"
MMARE11_43030	0.247953	-2.01186	0.00126307	conserved hypothetical membrane protein"
MMARE11_49410	0.0751503	-3.73408	0.00136628	EsaT-6 like protein EsxN_2"
MMARE11_06750	0.325201	-1.62059	0.00138491	lipoprotein aminopeptidase LpqL"
MMARE11_17470	0.381165	-1.39151	0.00139674	elongation factor Tsf"
MMARE11_15050	13.02	3.70266	0.00141596	hypothetical protein"
MMARE11_33870	0.11136	-3.1667	0.00143189	conserved hypothetical protein"
MMARE11_38960	0.355478	-1.49217	0.00143637	ATP synthase epsilon chain AtpC"
MMARE11_51030	0.33515	-1.57712	0.00143708	PE family protein, PE34"
MMARE11_09890	0.367631	-1.44367	0.00147912	50S ribosomal protein L2, RplB"
MMARE11_23490	3.85774	1.94776	0.00148353	integral membrane cytochrome D ubiquinol oxidase
MMARE11_40260	0.340607	-1.55382	0.00155686	serine protease HtrA (DegP protein)"
MMARE11_20130	0.170656	-2.55083	0.00157763	conserved hypothetical protein"
MMARE11_23720	0.170876	-2.54898	0.00157883	50S ribosomal protein L35, RpmL"
MMARE11_07770	0.372351	-1.42527	0.00159008	conserved hypothetical protein"
MMARE11_07300	0.0586791	-4.09101	0.00160953	aldehyde dehydrogenase, PutA_1"
MMARE11_25840	0.344095	-1.53912	0.00162974	conserved membrane protein"
MMARE11_10040	0.389007	-1.36213	0.00163501	50S ribosomal protein L5, RplE"
MMARE11_09640	0.171375	-2.54477	0.00165307	30S ribosomal protein S7, RpsG"
MMARE11_10080	0.141067	-2.82554	0.00165544	50S ribosomal protein L18, RplR"
MMARE11_23150	0.276966	-1.85222	0.00166481	l-aspartate oxidase NadB"
MMARE11_17190	0.37061	-1.43202	0.00166714	signal recognition particle protein Ffh"
MMARE11_07310	0.0792664	-3.65715	0.00170088	conserved hypothetical protein"
MMARE11_03810	0.289938	-1.78618	0.00170344	conserved Mce associated membrane protein"
MMARE11_37330	0.216311	-2.20882	0.00173599	acyl-CoA dehydrogenase FadE19"
MMARE11_37150	0.101622	-3.29872	0.00174303	hypothetical protein"
MMARE11_49490	0.290728	-1.78226	0.00175624	D-alanyl-D-alanine carboxypeptidase DacB1"
MMARE11_29480	0.396425	-1.33488	0.00178996	polyketide synthase, Pks12"
MMARE11_43440	3.225	1.6893	0.00182084	50S ribosomal protein L32 RpmF"
MMARE11_20370	0.258719	-1.95054	0.00182485	pyridoxine biosynthesis protein, SnzP"
MMARE11_09910	0.224785	-2.15338	0.00185521	50S ribosomal protein L22, RplV"
MMARE11_42770	0.361472	-1.46805	0.00187123	enolase Eno"
MMARE11_05310	0.249938	-2.00036	0.00187797	conserved hypothetical protein"
MMARE11_35540	0.148826	-2.7483	0.00190459	serine acetyltransferase CysE"
MMARE11_22310	0.350144	-1.51398	0.00191471	UDP-glucose 6-dehydrogenase, UdgL"
MMARE11_05880	0.3224	-1.63308	0.00196021	chaperone protein, DnaJ"
MMARE11_35300	11.6217	3.53875	0.00197718	conserved hypothetical protein"
MMARE11_10660	0.344975	-1.53544	0.00207475	phosphomannomutase, MrsA"
MMARE11_47330	0.345638	-1.53267	0.00207798	serine/threonine-protein kinase PknF_2"
MMARE11_02690	0.115795	-3.11036	0.00208324	PE-PGRS family protein, PE_PGRS1"
MMARE11_31810	0.201626	-2.31024	0.00208526	conserved hypothetical protein"
MMARE11_16940	0.49007	-1.02894	0.00208913	phenolpthiocerol synthesis type-I polyketide
MMARE11_51980	0.242324	-2.04499	0.00209208	acyltransferase"
MMARE11_36400	2.30371	1.20396	0.00209831	30S ribosomal protein S20 RpsT"
MMARE11_37130	0.409979	-1.28638	0.00217298	ATP-binding component of an ABC transporter"
MMARE11_50920	0.323008	-1.63036	0.0021996	long-chain-fatty-acid-CoA ligase FadD15_1"
MMARE11_52370	0.500343	-0.999011	0.00220416	ferredoxin-dependent glutamate synthase [NADPH]
MMARE11_21520	0.213108	-2.23035	0.00225736	transcriptional regulatory protein WhiA"
MMARE11_14340	0.261652	-1.93428	0.00226928	conserved protein"
MMARE11_48980	0.483263	-1.04912	0.00227556	conserved transcriptional regulatory protein"
MMARE11_00720	0.217595	-2.20028	0.00228177	single-strand binding protein Ssb"
MMARE11_09650	0.382106	-1.38795	0.00230011	elongation factor G, FusA1"
MMARE11_28260	0.247152	-2.01653	0.00236041	hypothetical protein"
MMARE11_17010	0.363333	-1.46064	0.00237125	conserved protein"
MMARE11_16310	0.363537	-1.45983	0.00240981	ketol-acid reductoisomerase IlvC"
MMARE11_52730	0.371541	-1.42841	0.00248289	PE family protein"
MMARE11_35960	3.87113	1.95276	0.002496	phenyloxazoline synthase MbtB"
MMARE11_35290	6.89173	2.78487	0.00261753	ornithine aminotransferase RocD1 and RocD2"
MMARE11_51850	0.472066	-1.08294	0.00265141	polyketide synthase Pks13"
MMARE11_35480	5.6654	2.50218	0.00267713	adenylate cyclase"
MMARE11_35470	18.0328	4.17255	0.00267964	formate dehydrogenase H FdhF"
MMARE11_36030	10.6894	3.41811	0.00275583	conserved hypothetical protein MbtH_1"
MMARE11_16770	0.295153	-1.76047	0.00277283	ketoreductase"
MMARE11_29540	0.19626	-2.34916	0.00285026	conserved hypothetical membrane protein"
MMARE11_21630	0.359054	-1.47773	0.00287154	triosephosphate isomerase Tpi"
MMARE11_40640	9.13569	3.19151	0.00287205	transcriptional regulator"
MMARE11_31000	0.377351	-1.40602	0.00287841	penicillin-binding membrane protein PbpB"
MMARE11_04600	0.240386	-2.05657	0.00300744	3-oxoacyl-[acyl-carrier protein] reductase
MMARE11_34680	0.242156	-2.04599	0.00304666	conserved hypothetical membrane protein"
MMARE11_20110	0.123824	-3.01363	0.0030803	conserved hypothetical protein"
MMARE11_21970	0.406717	-1.2979	0.00326384	cation transporter p-type ATPase D CtpD"
MMARE11_09210	0.459835	-1.12081	0.00330574	transcription antitermination protein, NusG"
MMARE11_03790	0.260479	-1.94076	0.00335524	MCE-family lipoprotein LprK (MCE-family
MMARE11_05000	2.10864	1.07631	0.00337247	conserved membrane protein"
MMARE11_34110	0.160877	-2.63597	0.00344245	flavodoxin oxidoreductase"
MMARE11_30850	0.442505	-1.17624	0.00346335	conserved secreted antigen Wag31"
MMARE11_18950	0.354563	-1.49589	0.00359778	conserved 35 kDa alanine rich protein"
MMARE11_16800	0.286122	-1.8053	0.00365166	fatty-acid-CoA ligase FadD22"
MMARE11_32220	10.6461	3.41225	0.00371446	hypothetical protein"
MMARE11_22490	0.256482	-1.96307	0.00383209	conserved hypothetical transmembrane protein"
MMARE11_34050	0.267155	-1.90425	0.00386283	conserved hypothetical protein"
MMARE11_38440	5.50309	2.46024	0.00393795	transmembrane ATP-binding protein ABC
MMARE11_13790	0.220732	-2.17963	0.00393938	NADH dehydrogenase I (chain E) NuoE
MMARE11_41070	0.192127	-2.37987	0.00398703	conserved hypothetical secreted protein"
MMARE11_47320	0.107468	-3.21802	0.00399066	conserved hypothetical protein"
MMARE11_10530	5.78098	2.53131	0.00407019	conserved hypothetical membrane protein"
MMARE11_35410	19.2884	4.26966	0.00409993	peptide synthetase Nrp (peptide synthase)"
MMARE11_22090	0.272747	-1.87437	0.00410847	conserved protein"
MMARE11_02980	0.133636	-2.90361	0.00412818	secreted antigen 85-C FbpC"
MMARE11_42140	0.274178	-1.86682	0.00413524	conserved hypothetical transmembrane protein"
MMARE11_17970	3.50097	1.80776	0.00420072	nickel/iron-hydrogenase I large subunit, HyaB"
MMARE11_12300	0.293373	-1.76919	0.00420845	acyl-CoA dehydrogenase FadE25"
MMARE11_34010	0.117714	-3.08664	0.00422744	pyruvate dehydrogenase E1 component (alpha
MMARE11_04790	5.1364	2.36076	0.00426176	aminoglycoside 2'-N-acetyltransferase Aac"
MMARE11_35990	21.5036	4.42651	0.00432125	conserved hypothetical protein"
MMARE11_37190	0.323531	-1.62803	0.00435763	conserved hypothetical membrane protein"
MMARE11_25990	0.331841	-1.59143	0.00439299	conserved membrane protein"
MMARE11_15940	0.166331	-2.58787	0.00442937	conserved transmembrane transport protein"
MMARE11_21240	0.212506	-2.23443	0.00443689	guanylate kinase Gmk"
MMARE11_46530	0.548384	-0.866741	0.00446828	cold shock protein a, CspA"
MMARE11_06050	0.0775069	-3.68953	0.00451003	carbon monoxyde dehydrogenase (medium chain),
MMARE11_08110	0.223076	-2.16439	0.00457166	metal cation-transporting p-type ATPase F, CtpF"
MMARE11_53080	2.53704	1.34314	0.00462715	hydrolase"
MMARE11_36750	0.501784	-0.994862	0.00479301	ribonuclease E Rne"
MMARE11_04610	0.275817	-1.85822	0.00481531	acetyl-CoA acyltransferase FadA2"
MMARE11_16880	2.83869	1.50522	0.0048633	conserved polyketide synthase associated protein
MMARE11_24970	0.207744	-2.26712	0.00487532	metal cation transporter p-type ATPase a, CtpF"
MMARE11_10110	0.333058	-1.58616	0.0049179	50S ribosomal protein L15, RplO"
MMARE11_22920	0.352831	-1.50295	0.00505292	fatty-acid-CoA ligase, FadD11"
MMARE11_30930	0.310348	-1.68804	0.00514232	UDP-N-acetylglucosamine-N-acetylmuramyl-(pentapeptide)
MMARE11_38840	0.413202	-1.27508	0.00520356	acetyl-CoA acetyltransferase FadA4"
MMARE11_13710	0.376581	-1.40897	0.00528563	NADH dehydrogenase I (chain M) NuoM
MMARE11_30880	0.329693	-1.6008	0.00529332	conserved protein"
MMARE11_27290	17.8219	4.15558	0.00531153	DNA-binding transcriptional regulator EnvR"
MMARE11_33980	0.226034	-2.14539	0.00540069	hypothetical protein"
MMARE11_01540	48.5666	5.60189	0.00549468	glutamate decarboxylase"
MMARE11_37700	0.209626	-2.25411	0.0055185	conserved hypothetical secreted protein"
MMARE11_12660	0.358948	-1.47815	0.00560038	two-component sensory transduction histidine
MMARE11_16490	0.347435	-1.52518	0.00566948	polyphosphate kinase Ppk"
MMARE11_24440	0.175866	-2.50746	0.00576548	PPE family protein"
MMARE11_31010	0.225792	-2.14693	0.00588926	conserved proline rich membrane protein"
MMARE11_00220	0.433437	-1.2061	0.00599897	'tRNA-Ser(cag)'"
MMARE11_07760	0.405989	-1.30049	0.0060655	conserved protein"
MMARE11_22370	0.240779	-2.05422	0.00620664	conserved hypothetical methyltransferase"
MMARE11_01910	6.91509	2.78975	0.00622973	serine hydroxymethyltransferase GlyA2"
MMARE11_36470	6.71969	2.74839	0.00624477	enhanced intracellular survival protein Eis"
MMARE11_04580	0.296576	-1.75352	0.00626262	conserved transmembrane protein"
MMARE11_10500	0.354173	-1.49747	0.00639645	D-serine/D-alanine/glycine transporter, CycA"
MMARE11_24570	0.253817	-1.97814	0.00644036	'tRNA-Pro(ggg)'"
MMARE11_04270	0.18457	-2.43776	0.00662919	enoyl-CoA hydratase EchA1"
MMARE11_47930	0.378255	-1.40257	0.0066313	MCE-family lipoprotein LprN"
MMARE11_39030	2.91074	1.54139	0.00665666	ATP synthase a chain AtpB"
MMARE11_00880	6.79808	2.76513	0.00665783	non-ribosomal peptide synthetase"
MMARE11_43640	2.54297	1.34652	0.00673862	conserved hypothetical protein"
MMARE11_20920	0.418948	-1.25516	0.00684371	alanyl-tRNA synthetase AlaS"
MMARE11_21230	0.235144	-2.08838	0.00684591	integration host factor MihF"
MMARE11_39010	0.530287	-0.915155	0.00685634	ATP synthase B chain AtpF"
MMARE11_43740	0.109018	-3.19737	0.00687562	PE-PGRS family protein"
MMARE11_52140	0.397151	-1.33224	0.00687574	bacterioferritin BfrB"
MMARE11_47760	2.49889	1.32129	0.0068852	conserved hypothetical membrane protein CpsA"
MMARE11_14620	0.109073	-3.19663	0.00690101	conserved hypothetical protein"
MMARE11_04590	0.271326	-1.8819	0.00692761	conserved membrane protein"
MMARE11_45070	0.199517	-2.32541	0.00700236	fatty-acid-CoA racemase Far"
MMARE11p_00250	4.59217	2.19918	0.00701531	'serine/threonine-protein kinase'"
MMARE11_11040	6.39045	2.67592	0.00712075	conserved hypothetical protein"
MMARE11_20200	0.232631	-2.10389	0.0072466	conserved hypothetical protein"
MMARE11_21950	0.236261	-2.08155	0.00736053	acyl-CoA dehydrogenase FadE15"
MMARE11_23760	0.383658	-1.38211	0.00747727	PE family protein"
MMARE11_53100	0.262214	-1.93118	0.00753016	chromosome partitioning protein ParB"
MMARE11_02910	0.272718	-1.87452	0.00755454	elongation factor G FusA2"
MMARE11_16060	0.410627	-1.2841	0.00761007	electron transfer flavoprotein (alpha-subunit)
MMARE11_22740	0.258998	-1.94899	0.00762621	conserved hypothetical transmembrane protein"
MMARE11_48210	3.75197	1.90765	0.00773112	conserved hypothetical secreted protein"
MMARE11_48220	3.75197	1.90765	0.00783648	conserved hypothetical membrane protein"
MMARE11_51940	3.18501	1.6713	0.00785854	UDP-galactopyranose mutase Glf"
MMARE11_52690	0.537406	-0.895914	0.00791511	type VII secretion protein EccA1
MMARE11_21730	0.299093	-1.74133	0.00803446	OXPP cycle protein OpcA"
MMARE11_30920	0.378381	-1.40209	0.00805943	UDP-N-acetylmuramate-alanine ligase MurC"
MMARE11_52150	0.402337	-1.31352	0.00812018	glycerophosphoryl diester phosphodiesterase
MMARE11_31830	0.305105	-1.71262	0.00812514	acetolactate synthase (large subunit) IlvB1_2"
MMARE11_36140	5.53878	2.46957	0.008174	conserved hypothetical protein"
MMARE11_09690	0.30727	-1.70242	0.00819685	ferredoxin reductase"
MMARE11_37370	0.246093	-2.02272	0.00820382	succinyl-CoA:3-ketoacid-coenzyme A transferase
MMARE11_07490	0.330642	-1.59666	0.00820828	iron-regulated heparin binding hemagglutinin
MMARE11_19560	0.356477	-1.48812	0.00823344	1-deoxy-D-xylulose 5-phosphate synthase Dxs1"
MMARE11_06060	0.13507	-2.88822	0.0082394	carbon monoxyde dehydrogenase (small chain),
MMARE11_00960	0.270377	-1.88696	0.00826728	cellobiohydrolase a (1,4-beta-cellobiosidase a)
MMARE11_01510	67.3077	6.0727	0.00828804	nucleoside-diphosphate-sugar epimerase"
MMARE11_25320	0.515798	-0.955123	0.00851234	conserved transmembrane ATP-binding protein ABC
MMARE11_22550	0.343273	-1.54257	0.00851796	glycosyltransferase, WcaA"
MMARE11_44000	2.74437	1.45648	0.00857006	DNA binding domain, excisionase family"
MMARE11_22640	0.537006	-0.89699	0.00857157	conserved transmembrane transport protein, MmpL
MMARE11_52020	2.83431	1.503	0.00864291	conserved hypothetical protein"
MMARE11_27590	0.177378	-2.4951	0.00885352	immunogenic protein Mpt63"
MMARE11_29990	0.247427	-2.01493	0.00905524	conserved membrane protein"
MMARE11_21680	5.61746	2.48992	0.00909321	protein-export membrane protein (translocase
MMARE11_34120	0.142812	-2.80781	0.00913868	ferredoxin"
MMARE11_25980	0.516662	-0.952709	0.00916453	proline rich membrane-anchored mycosin MycP5"
MMARE11_32010	3.35622	1.74684	0.00927256	3-methyl-2-oxobutanoate hydroxymethyltransferase
MMARE11_16350	0.323735	-1.62711	0.00927684	3-isopropylmalate dehydrogenase LeuB"
MMARE11_02670	0.415278	-1.26785	0.0093051	cation-transporter ATPase I CtpI"
MMARE11_18940	0.24984	-2.00092	0.00934387	transcriptional regulatory protein"
MMARE11_49880	0.522655	-0.936069	0.00935563	conserved regulatory protein"
MMARE11_36020	3.25044	1.70064	0.00935771	polyketide synthase MbtD"
MMARE11_25300	0.399697	-1.32302	0.00951392	aldehyde dehydrogenase"
MMARE11_26330	0.469788	-1.08992	0.00953173	conserved membrane protein"
MMARE11_10870	0.148717	-2.74936	0.00954442	PPE family protein"
MMARE11_05910	7.38382	2.88437	0.00976674	PPE family protein"
MMARE11_18200	0.38329	-1.38349	0.0100025	N utilization substance protein a NusA"
MMARE11_36920	0.439905	-1.18474	0.0100041	'tRNA-Gly(tcc)'"
MMARE11_36880	0.566235	-0.820528	0.0100226	ATP-dependent CLP protease ATP-binding subunit
MMARE11_21210	0.474334	-1.07602	0.0100412	carbamoyl-phosphate synthase large chain CarB"
MMARE11_01590	89.3697	6.48171	0.0100431	conserved membrane protein"
MMARE11_05660	0.198409	-2.33345	0.0100469	PE-PGRS family protein, PE_PGRS9_5"
MMARE11_18500	2.64847	1.40516	0.010052	30S ribosomal protein S15 RpsO"
MMARE11_44350	0.197242	-2.34196	0.0103623	PE family protein"
MMARE11_44800	0.333847	-1.58274	0.0104071	conserved protein"
MMARE11_20580	3.81416	1.93136	0.0105291	fatty-acid-CoA ligase FadD9"
MMARE11_26380	0.333722	-1.58328	0.0105452	inosine-5'-monophosphate dehydrogenase GuaB1"
MMARE11_07600	0.377035	-1.40723	0.0106662	transcriptional regulatory protein"
MMARE11_28500	0.256932	-1.96054	0.0107197	conserved hypothetical secreted protein"
MMARE11_31820	0.235327	-2.08726	0.0107559	conserved hypothetical protein"
MMARE11_39930	7.60297	2.92656	0.0108895	conserved hypothetical integral membrane
MMARE11_42710	3.35241	1.7452	0.0110414	two-component sensor histidine kinase TrcS"
MMARE11_21720	0.305584	-1.71036	0.0110647	6-phosphogluconolactonase DevB"
MMARE11_51400	0.152541	-2.71273	0.011105	PE-PGRS family protein"
MMARE11_37310	0.240017	-2.05879	0.011203	citrate (pro-3s)-lyase (beta subunit) CitE"
MMARE11_31950	0.452294	-1.14467	0.0114209	glutamate-ammonia-ligase adenylyltransferase
MMARE11_23140	0.368947	-1.43851	0.0115443	quinolinate synthetase NadA"
MMARE11_12370	0.308095	-1.69855	0.0116256	metal cation-transporting p-type ATPase C CtpC"
MMARE11_36910	0.454718	-1.13696	0.0116672	ATP-dependent CLP protease proteolytic subunit 1
MMARE11_28990	8.21388	3.03806	0.0117808	acyl-ACP thioesterase, FatA"
MMARE11_22880	0.268748	-1.89567	0.0117836	fatty acyl-CoA reductase"
MMARE11_06850	0.373663	-1.42019	0.0117841	thiamine biosynthesis protein ThiC"
MMARE11_07110	0.338956	-1.56083	0.0118607	PPE family protein, PPE10"
MMARE11_25080	5.77559	2.52997	0.011916	Z-decaprenyl diphosphate synthase"
MMARE11_40510	19.0819	4.25413	0.0119554	conserved integral membrane transport protein"
MMARE11_52880	4.03751	2.01347	0.0120055	hypothetical protein"
MMARE11_01550	77.0808	6.2683	0.0120431	conserved protein"
MMARE11_46550	5.76559	2.52747	0.0122016	conserved hypothetical protein"
MMARE11_46510	0.121037	-3.04647	0.0122217	conserved hypothetical protein"
MMARE11_31800	0.26473	-1.9174	0.0124722	multimeric flavodoxin WrbA"
MMARE11_52490	26.5401	4.7301	0.0125118	conserved hypothetical protein"
MMARE11_43960	4.35755	2.12352	0.0125494	divalent cation-transport integral membrane
MMARE11_22110	0.364384	-1.45647	0.0127484	3-oxoacyl-[acyl-carrier protein] reductase,
MMARE11_34200	0.503516	-0.989889	0.0128482	Geranylgeranyl pyrophosphate synthase"
MMARE11_00870	8.29885	3.05291	0.0129903	polyketide synthase"
MMARE11_51000	0.406194	-1.29976	0.0130378	non-ribosomal peptide synthetase"
MMARE11_34890	0.196474	-2.34759	0.0130909	PE-PGRS family protein"
MMARE11_03290	0.503771	-0.989161	0.0130962	aldehyde dehydrogenase (NAD+) dependent"
MMARE11_45780	8.13726	3.02454	0.0132358	integral membrane transporter"
MMARE11_10130	0.348635	-1.52021	0.0132723	protease iv, Ssp"
MMARE11_16680	0.36796	-1.44238	0.0133667	pyruvate carboxylase Pca"
MMARE11_23970	2.26871	1.18187	0.0137743	chalcone synthase, Pks11_1"
MMARE11_22630	0.48935	-1.03106	0.0138822	fatty acyl-AMP ligase FadD25"
MMARE11p_00890	11.1089	3.47364	0.0139914	hypothetical protein"
MMARE11_30860	4.25858	2.09037	0.0140012	conserved hypothetical membrane protein"
MMARE11_25800	4.18125	2.06393	0.0140781	conserved hypothetical membrane protein"
MMARE11_13110	0.291825	-1.77683	0.0140798	Soj/ParA-related protein"
MMARE11_43580	0.406119	-1.30003	0.0141729	conserved transmembrane protein"
MMARE11_07350	0.367692	-1.44343	0.0144264	dihydrolipoamide dehydrogenase Lpd"
MMARE11_26390	0.424828	-1.23505	0.0144706	6-phosphogluconate dehydrogenase Gnd1"
MMARE11_36170	0.398086	-1.32885	0.0144939	ferredoxin-dependent nitrite reductase, NirA_2"
MMARE11_00010	2.93304	1.5524	0.0145533	Chromosomal replication initiator protein DnaA"
MMARE11_48660	5.34113	2.41714	0.0146385	acyl-CoA dehydrogenase FadE31"
MMARE11_02810	2.58366	1.36942	0.0146483	conserved hypothetical protein"
MMARE11_23810	15.2889	3.93441	0.0147251	PE-PGRS family protein"
MMARE11_05380	25.4568	4.66998	0.0148065	glucose kinase"
MMARE11_37010	0.312077	-1.68002	0.0149092	conserved protein"
MMARE11_50300	0.164335	-2.60528	0.0152903	PE-PGRS family protein, PE_PGRS9_2"
MMARE11_46070	7.09547	2.8269	0.0152903	2-hydroxy-6-OXO-6-phenylhexa-2,4-dienoate
MMARE11_00740	0.425135	-1.23401	0.0156212	50S ribosomal protein L9 RplI"
MMARE11_22540	0.428544	-1.22248	0.0156258	acetolactate synthase (large subunit) IlvB1_3"
MMARE11_15640	0.379226	-1.39887	0.0156495	transcriptional regulatory protein (probably
MMARE11_37340	0.288152	-1.7951	0.0157204	acetyl-/propionyl-coenzyme A carboxylase alpha
MMARE11_22160	0.263879	-1.92205	0.0157276	conserved hypothetical secreted protein"
MMARE11_41640	9.25677	3.21051	0.015857	conserved hypothetical exported protein"
MMARE11_36900	0.288192	-1.7949	0.0161404	ATP-dependent CLP protease proteolytic subunit 2
MMARE11_20150	0.454625	-1.13725	0.0162147	conserved hypothetical protein"
MMARE11_16920	0.562909	-0.829027	0.0163334	phenolpthiocerol synthesis type-I polyketide
MMARE11_29920	10.0527	3.32951	0.016359	conserved hypothetical alanine and proline rich
MMARE11_23030	0.391125	-1.3543	0.0166711	inv protein"
MMARE11_00100	0.100112	-3.32032	0.0167168	conserved hypothetical protein"
MMARE11_18770	0.178762	-2.48388	0.0168491	acyl-CoA dehydrogenase FadE34_1"
MMARE11_19670	3.13045	1.64637	0.0168618	conserved transmembrane protein"
MMARE11_09850	0.426985	-1.22774	0.0170174	30S ribosomal protein S10, RpsJ"
MMARE11_20540	0.161441	-2.63092	0.0170179	PE-PGRS family protein"
MMARE11_05090	3.15462	1.65747	0.0171417	conserved hypothetical membrane protein"
MMARE11_19940	9.70312	3.27845	0.017148	hypothetical protein"
MMARE11_46770	0.133873	-2.90107	0.0171573	sulphur metabolism protein, SseC2"
MMARE11_17530	0.459946	-1.12046	0.0172418	uridylate kinase PyrH"
MMARE11_10430	0.456176	-1.13234	0.0173407	50S ribosomal protein L36 RpmJ"
MMARE11_21410	0.382668	-1.38584	0.0175241	aminoglycosides/tetracycline-transport integral
MMARE11_17030	0.362384	-1.46441	0.0176219	ribonuclease III Rnc"
MMARE11_01410	0.279426	-1.83946	0.0177004	coenzyme F420-dependent oxidoreductase"
MMARE11_42730	17.1121	4.09695	0.0179024	conserved hypothetical protein"
MMARE11_47730	3.59726	1.8469	0.0179352	conserved hypothetical secreted protein"
MMARE11_45080	0.266614	-1.90718	0.0179758	conserved hypothetical protein"
MMARE11_15000	5.84914	2.54822	0.0181221	conserved hypothetical protein"
MMARE11_23920	0.380974	-1.39224	0.0181968	argininosuccinate lyase ArgH"
MMARE11_22940	4.38655	2.13309	0.0182387	hypothetical protein"
MMARE11_01740	0.22887	-2.1274	0.0182874	PE family protein, PE35"
MMARE11_39120	0.420993	-1.24813	0.0182943	threonine synthase ThrC"
MMARE11_43680	3.55827	1.83118	0.0183131	conserved hypothetical protein"
MMARE11_48870	17.872	4.15963	0.0183451	ATPase component of an ABC-type transport
MMARE11_20840	4.19498	2.06866	0.0183547	conserved hypothetical protein"
MMARE11_48650	8.95055	3.16198	0.0185685	fatty-acid-CoA ligase FadD3"
MMARE11_09870	0.352336	-1.50498	0.0186231	50S ribosomal protein L4, RplD"
MMARE11_12000	0.349119	-1.51821	0.0186264	arylsulfatase AtsB (aryl-sulfate
MMARE11_06590	2.58195	1.36846	0.0186379	phosphate acetyltransferase Pta"
MMARE11_26550	2.74038	1.45438	0.0186802	conserved hypothetical protein"
MMARE11_00900	9.36823	3.22778	0.0187161	polyketide synthase PKS"
MMARE11_36510	5.84874	2.54813	0.0187448	conserved transmembrane transport protein
MMARE11_13840	0.292605	-1.77297	0.0188564	PPE family protein"
MMARE11_09180	0.564879	-0.823986	0.0189436	conserved protein"
MMARE11_23020	2.49645	1.31988	0.01903	conserved hypothetical membrane protein"
MMARE11_06900	0.519624	-0.94446	0.0190876	metal cation transporting p-type ATPase CtpH"
MMARE11_52120	17.6881	4.14471	0.0192008	conserved hypothetical protein"
MMARE11_24240	0.296253	-1.7551	0.0192206	conserved protein"
MMARE11_01530	18.2252	4.18786	0.0194111	4-aminobutyrate aminotransferase, GabT_2"
MMARE11_52680	0.403478	-1.30944	0.0194736	conserved hypothetical protein"
MMARE11_25220	16.3516	4.03136	0.0196174	hypothetical protein"
MMARE11_38190	21.9502	4.45616	0.0196667	conserved hypothetical metal-dependent
MMARE11_40550	2.90014	1.53612	0.0197492	transcriptional regulatory protein"
MMARE11_46940	3.25283	1.7017	0.0197609	UDP-glucose-4-epimerase, CpsY"
MMARE11_15530	0.202648	-2.30295	0.0199525	hypothetical protein"
MMARE11_47910	0.3633	-1.46077	0.0202916	conserved hypothetical alanine and valine rich
MMARE11_20930	0.228515	-2.12964	0.0203584	conserved hypothetical protein"
MMARE11_09630	0.374874	-1.41552	0.0203981	30S ribosomal protein S12, RpsL"
MMARE11_37180	0.405608	-1.30184	0.0204085	bifunctional transmembrane phospholipid
MMARE11_13810	0.352835	-1.50293	0.0206266	NADH dehydrogenase I (chain C) NuoC
MMARE11_13500	0.2837	-1.81756	0.0206949	hypothetical protein"
MMARE11_26090	12.6142	3.65697	0.0207719	hypothetical protein"
MMARE11_05460	12.9992	3.70035	0.020794	hypothetical protein"
MMARE11_05990	0.245544	-2.02595	0.0209629	orotate phosphoribosyltransferase PyrE"
MMARE11_46640	0.547547	-0.868945	0.0210476	acyl-[acyl-carrier protein] desaturase DesA1"
MMARE11_32940	0.156691	-2.67401	0.0210691	conserved hypothetical membrane protein"
MMARE11_09930	0.457139	-1.1293	0.0211931	50S ribosomal protein L16, RplP"
MMARE11_37020	0.400201	-1.3212	0.0216008	conserved hypothetical protein"
MMARE11_19280	4.99914	2.32168	0.0216931	conserved hypothetical membrane protein"
MMARE11_21750	0.486369	-1.03988	0.0217833	transaldolase Tal"
MMARE11_29890	0.38963	-1.35982	0.0219161	conserved hypothetical protein"
MMARE11_13830	0.355259	-1.49306	0.0220677	NADH dehydrogenase I (chain a) NuoA
MMARE11_23860	0.365389	-1.4525	0.0222211	glutamate N-acetyltransferase ArgJ"
MMARE11_01660	15.1516	3.9214	0.0222692	MCE-family protein Mce6C"
MMARE11_51900	0.412189	-1.27862	0.0223634	conserved transmembrane protein"
MMARE11_08070	5.63343	2.49401	0.0224174	conserved hypothetical protein"
MMARE11_32330	0.505173	-0.98515	0.0224373	conserved protein"
MMARE11_48880	27.9845	4.80655	0.0225228	permease component of an ABC-type transporter"
MMARE11_11730	0.169468	-2.56092	0.0225578	hypothetical protein"
MMARE11_17670	0.467503	-1.09695	0.0226014	conserved transmembrane protein"
MMARE11_30390	4.02414	2.00868	0.0228802	conserved hypothetical protein"
MMARE11_39680	12.7284	3.66998	0.0232291	citrate (pro-3s)-lyase (beta subunit) CitE_1"
MMARE11_44970	9.99738	3.32155	0.0232994	conserved hypothetical protein"
MMARE11_47940	0.35932	-1.47666	0.0234076	MCE-family protein Mce4D"
MMARE11_05530	2.41246	1.27051	0.0234428	'tRNA-Gly(ccc)'"
MMARE11_32250	20.9292	4.38745	0.0235496	nucleoside-diphosphate-sugar epimerase"
MMARE11_30080	0.419046	-1.25482	0.02368	conserved protein"
MMARE11_12110	9.4817	3.24515	0.0237596	L-lysine-epsilon aminotransferase Lat"
MMARE11_41870	0.43087	-1.21468	0.0239287	fructose 1,6-bisphosphatase GlpX"
MMARE11_40680	13.1585	3.71792	0.0240057	conserved hypothetical protein"
MMARE11_42830	2.24237	1.16503	0.0240057	ribose-phosphate pyrophosphokinase PrsA"
MMARE11_14290	0.193689	-2.36819	0.0241384	two-component transcriptional regulatory protein
MMARE11_51840	0.54883	-0.865568	0.0241742	propionyl-CoA carboxylase beta chain 4 AccD4_1"
MMARE11_21940	0.384088	-1.38049	0.0243263	PE-PGRS family protein"
MMARE11_37350	0.350548	-1.51232	0.0244384	acetyl-/propionyl-CoA carboxylase (beta subunit)AccD1
MMARE11_27830	30.6281	4.93679	0.0244776	enoyl-CoA hydratase EchA13"
MMARE11_00660	3.86059	1.94882	0.0247271	conserved hypothetical membrane protein"
MMARE11_17630	2.18979	1.13079	0.0248982	hypothetical protein"
MMARE11_53120	0.169972	-2.55663	0.0249298	glucose-inhibited division protein B Gid"
MMARE11_40170	5.68648	2.50754	0.0249965	sugar-transport integral membrane protein ABC
MMARE11_34670	0.302226	-1.7263	0.0250453	conserved proline, glycine, valine-rich secreted
MMARE11_41200	1.80924	0.855386	0.0251949	conserved hypothetical protein"
MMARE11_00770	3.5764	1.83851	0.0252231	conserved hypothetical protein"
MMARE11_21160	2.37791	1.2497	0.0252834	pyrimidine operon regulatory protein PyrR"
MMARE11_34070	0.0675881	-3.88709	0.0253509	conserved hypothetical protein"
MMARE11_04780	13.7249	3.77872	0.0253787	integral membrane nitrite extrusion protein
MMARE11_36280	0.501407	-0.995946	0.0256726	conserved hypothetical glycosyl hydrolase"
MMARE11_18210	0.506029	-0.982709	0.0259442	conserved hypothetical protein"
MMARE11_38590	0.344758	-1.53634	0.0259645	conserved hypothetical integral membrane protein
MMARE11p_00030	53.0887	5.73033	0.0262653	'ParB/RepB/Spo0J family partition protein'"
MMARE11_49980	3.80098	1.92637	0.0265216	conserved hypothetical protein"
MMARE11_32380	0.637288	-0.649983	0.0265315	meromycolate extension acyl carrier protein
MMARE11_21400	0.473266	-1.07928	0.0266713	bifunctional riboflavin biosynthesis protein
MMARE11_50870	0.216241	-2.20929	0.0267056	conserved hypothetical protein"
MMARE11_50570	0.477504	-1.06642	0.0268243	conserved protein"
MMARE11_17760	34.3938	5.10408	0.0271809	conserved hypothetical membrane protein"
MMARE11_18980	0.295986	-1.7564	0.0272964	glycosyl transferase"
MMARE11_51910	0.43196	-1.21103	0.027396	conserved transmembrane protein"
MMARE11_23950	0.453807	-1.13985	0.027512	polyketide synthase, Pks8"
MMARE11_09490	2.96708	1.56904	0.0275227	ceramidase"
MMARE11_00730	0.302604	-1.7245	0.0276845	30S ribosomal protein S18-1 RpsR1"
MMARE11_06760	0.376743	-1.40835	0.0277215	lipoprotein aminopeptidase LpqL_1"
MMARE11_49350	0.545308	-0.874856	0.0277525	membrane-bound protease FtsH"
MMARE11_17310	0.492224	-1.02261	0.0277875	50S ribosomal protein L19 RplS"
MMARE11_31210	54.7051	5.7736	0.0278778	3-oxoacyl-[acyl-carrier-protein] synthase III,
MMARE11_01480	10.3955	3.37789	0.0281141	conserved hypothetical membrane protein"
MMARE11_34020	0.140721	-2.82909	0.0281889	pyruvate dehydrogenase E1 component (beta
MMARE11_04540	3.47088	1.7953	0.0283905	small secreted protein"
MMARE11_30940	0.511952	-0.965921	0.0287732	FtsW-like protein FtsW"
MMARE11_19440	0.424115	-1.23747	0.0288327	conserved hypothetical protein"
MMARE11_09970	3.78932	1.92194	0.0289335	hypothetical protein"
MMARE11_27550	2.37009	1.24494	0.0290396	acyl-CoA ligase FadD31"
MMARE11_34990	4.32741	2.1135	0.0293074	PPE family protein"
MMARE11_02620	22.626	4.49991	0.029321	50S ribosomal protein L28 RpmB2"
MMARE11_03420	0.51696	-0.951877	0.0294246	NAD(P) transhydrogenase (subunit beta) PntB"
MMARE11_50590	0.42032	-1.25044	0.029717	cyclopropane-fatty-acyl-phospholipid synthase"
MMARE11p_00200	2.47919	1.30987	0.0298598	putative ATPase"
MMARE11_04310	3.71817	1.89459	0.0302041	peptide synthetase"
MMARE11_14730	11.2303	3.48933	0.0302788	conserved hypothetical protein"
MMARE11_20420	11.2303	3.48933	0.0303405	PE-PGRS family protein"
MMARE11_34560	0.27524	-1.86124	0.0305548	conserved hypothetical secreted protein"
MMARE11_52410	22.8162	4.51199	0.0307089	PPE family protein"
MMARE11_01690	6.79499	2.76447	0.0307502	MCE-family protein Mce6F"
MMARE11_39160	26.5864	4.73262	0.0307915	hypothetical protein"
MMARE11_35030	14.81	3.88849	0.0307994	hypothetical protein"
MMARE11_47070	0.428112	-1.22394	0.0311989	phosphoribosylformylglycinamidine synthase I,
MMARE11_38980	0.531202	-0.912667	0.0312344	ATP synthase gamma chain AtpG"
MMARE11_21740	0.493526	-1.0188	0.0316006	glucose-6-phosphate 1-dehydrogenase Zwf2"
MMARE11_18780	0.253428	-1.98035	0.031799	acyl-CoA dehydrogenase FadE18_1"
MMARE11_05720	8.52399	3.09153	0.0318003	conserved hypothetical protein"
MMARE11_27040	0.284484	-1.81358	0.0318562	conserved hypothetical membrane protein"
MMARE11_26340	0.420002	-1.25153	0.0323313	malate synthase G GlcB"
MMARE11_16340	0.405146	-1.30348	0.0325471	D-3-phosphoglycerate dehydrogenase SerA1"
MMARE11_24000	4.30233	2.10512	0.0325798	D-amino acid oxidase Aao_1"
MMARE11_29520	0.490675	-1.02716	0.0325889	polyprenol-monophosphomannose synthase, Ppm1A"
MMARE11_52520	34.9848	5.12866	0.0326744	conserved hypothetical transmembrane protein"
MMARE11_34130	0.123058	-3.02259	0.0327547	conserved hypothetical membrane protein"
MMARE11_41220	0.29819	-1.7457	0.0329802	alpha-methylacyl-CoA racemase Mcr"
MMARE11_00830	5.36276	2.42298	0.0330014	conserved transmembrane transport protein,
MMARE11_38310	10.9751	3.45616	0.0331278	enoyl-CoA hydratase EchA16_1"
MMARE11_07610	0.422205	-1.24398	0.0333491	mannosyltransferase"
MMARE11_42340	0.417675	-1.25955	0.033489	acid phosphatase precursor"
MMARE11_00840	13.8117	3.78782	0.0338726	conserved membrane protein MmpS5_3"
MMARE11_09900	0.447916	-1.1587	0.0339144	50S ribosomal protein S19, RpsS"
MMARE11_49670	14.9469	3.90178	0.0341182	conserved hypothetical membrane protein"
MMARE11_24070	0.498989	-1.00292	0.0341315	long-chain acyl-CoA synthase"
MMARE11_13960	14.07	3.81455	0.0343335	oxidoreductase"
MMARE11_27870	18.8873	4.23935	0.0345205	conserved hypothetical oxidoreducatse"
MMARE11_27580	0.161773	-2.62796	0.0346465	hypothetical protein"
MMARE11_10450	0.42054	-1.24969	0.0346753	30S ribosomal protein S11, RpsK"
MMARE11_14680	4.10059	2.03583	0.0347572	transcriptional regulatory protein"
MMARE11_47130	4.71553	2.23742	0.0349643	conserved hypothetical integral membrane
MMARE11_23510	2.67678	1.4205	0.0350369	'tRNA-Leu(caa)'"
MMARE11_27241	0.315071	-1.66625	0.0350769	conserved membrane protein"
MMARE11_19820	11.3743	3.50771	0.0351108	hypothetical protein"
MMARE11_36860	0.584654	-0.774344	0.0351476	pyruvate:ferredoxin oxidoreductase, PorA, alpha
MMARE11_11920	0.455787	-1.13357	0.0351863	glycerol-3-phosphate dehydrogenase GlpD2"
MMARE11_25380	0.363392	-1.4604	0.0353311	amidohydrolase"
MMARE11_17270	0.405611	-1.30183	0.035339	conserved protein"
MMARE11_16390	3.54968	1.82769	0.0353451	conserved protein"
MMARE11_01560	23.754	4.5701	0.0354823	conserved protein"
MMARE11_38940	4.95337	2.30841	0.0355986	cobalamin adenosyltransferase"
MMARE11_29510	0.479269	-1.06109	0.0359234	polyprenol-monophosphomannose synthase, Ppm1B"
MMARE11_40710	30.4216	4.92702	0.0359503	nitrite extrusion protein, NarK3_3"
MMARE11_34640	18.3769	4.19982	0.0360163	conserved hypothetical protein"
MMARE11_30210	8.54899	3.09575	0.0360291	polyketide synthase and peptide synthetase"
MMARE11_20640	0.452615	-1.14365	0.0360852	adenine phosphoribosyltransferase, Apt"
MMARE11_26920	0.196643	-2.34635	0.0361161	conserved hypothetical protein"
MMARE11_14190	14.0825	3.81583	0.0362642	'Fe/S biogenesis protein NfuA'"
MMARE11_40880	0.37515	-1.41446	0.0362981	aminotransferase"
MMARE11_07220	2.87082	1.52146	0.0364137	conserved membrane protein MmpS4_2"
MMARE11_52970	5.0655	2.34071	0.0364977	conserved hypothetical protein"
MMARE11_27970	10.4646	3.38745	0.0365459	cytochrome P450 278A1 Cyp278A1"
MMARE11_47530	0.374716	-1.41613	0.036957	'tRNA-Thr(tgt)'"
MMARE11_05470	8.76323	3.13146	0.0370102	Transposase"
MMARE11_01640	10.8797	3.44357	0.0371781	MCE-family protein Mce6A"
MMARE11_19550	2.21463	1.14707	0.0374122	conserved protein"
MMARE11_43920	0.472533	-1.08151	0.037467	periplasmic phosphate-binding lipoprotein PhoS2"
MMARE11_50180	5.34519	2.41824	0.0376676	formate dehydrogenase, beta subunit,
MMARE11_17780	17.8664	4.15918	0.0376757	conserved hypothetical membrane protein"
MMARE11_08060	3.2826	1.71484	0.0382728	conserved hypothetical secreted protein"
MMARE11p_00470	4.55881	2.18866	0.0383287	Flp pilus assembly protein, ATPase CpaE"
MMARE11_22170	0.301574	-1.72942	0.0384216	conserved membrane protein"
MMARE11_30280	4.9631	2.31124	0.0384914	PPE family protein, PPE37"
MMARE11_00570	3.29552	1.72051	0.0385007	short-chain type oxidoreductase"
MMARE11_42990	2.89383	1.53298	0.0385827	conserved hypothetical secreted protein"
MMARE11_19840	10.8327	3.43732	0.0386885	hypothetical protein"
MMARE11_21610	0.367221	-1.44528	0.0387335	glyceraldehyde 3-phosphate dehydrogenase Gap"
MMARE11_02430	8.66043	3.11444	0.0388678	oxidoreductase"
MMARE11_32050	0.136918	-2.86862	0.0389014	ribonuclease P RNA"
MMARE11_39150	2.0441	1.03147	0.0390032	'tRNA-Arg(ccg)'"
MMARE11_46310	0.362782	-1.46283	0.039024	hypothetical membrane protein"
MMARE11_11380	0.336618	-1.57081	0.0390595	conserved secreted protein"
MMARE11_04870	0.549791	-0.863045	0.0391411	acyl-CoA dehydrogenase FadE6"
MMARE11_36730	0.590387	-0.760266	0.0392329	50S ribosomal protein L27 RpmA"
MMARE11_51730	3.19576	1.67616	0.0393144	oxidoreductase"
MMARE11_47050	20.2976	4.34324	0.0395672	conserved hypothetical protein"
MMARE11_05900	3.20597	1.68076	0.0396767	PPE family protein"
MMARE11_07280	0.308427	-1.697	0.0396939	enoyl-CoA hydratase EchA2"
MMARE11_14170	17.3559	4.11736	0.0399619	hypothetical protein"
MMARE11_15370	11.0416	3.46488	0.0400948	hypothetical protein"
MMARE11_44700	0.325128	-1.62092	0.0401631	conserved protein"
MMARE11_01070	6.98347	2.80394	0.0402415	conserved hypothetical protein"
MMARE11_22730	2.6791	1.42175	0.0403387	glycosyl transferase"
MMARE11_30190	4.09884	2.03522	0.0406203	non-ribosomal peptide synthetase"
MMARE11_19070	0.259754	-1.94478	0.0406731	conserved hypothetical membrane protein"
MMARE11_24300	0.517153	-0.951337	0.0406746	conserved hypothetical membrane protein"
MMARE11_44360	0.300867	-1.7328	0.0406988	PPE family protein"
MMARE11_42060	5.59646	2.48452	0.0407131	conserved membrane protein"
MMARE11_25970	0.605281	-0.724324	0.040735	conserved membrane protein"
MMARE11_07790	1.75013	0.807462	0.0407486	conserved protein"
MMARE11_01840	0.305337	-1.71153	0.0408017	conserved hypothetical protein"
MMARE11_27560	2.89882	1.53547	0.0409196	phosphotransferase"
MMARE11_40580	0.345664	-1.53256	0.0412136	conserved hypothetical protein"
MMARE11_24290	0.412504	-1.27752	0.0412654	DNA repair protein, RecN"
MMARE11_04300	19.7771	4.30576	0.0412874	fatty-acid-CoA ligase"
MMARE11p_00300	10.2455	3.35692	0.0414163	hypothetical protein"
MMARE11_08420	3.95718	1.98447	0.041422	Glyoxalase"
MMARE11_01830	0.35599	-1.49009	0.0415593	conserved hypothetical membrane protein"
MMARE11_36050	4.74875	2.24755	0.0416412	bifunctional enzyme MbtA: salicyl-AMP ligase
MMARE11_52320	2.11479	1.08051	0.0417497	immunogenic protein Mpt64"
MMARE11_48290	10.2417	3.35638	0.0418793	conserved hypothetical protein"
MMARE11_22120	0.508527	-0.975603	0.0418982	enoyl-[acyl-carrier-protein] reductase, InhA"
MMARE11_42360	0.323461	-1.62834	0.0419678	conserved hypothetical protein"
MMARE11_43800	6.96831	2.80081	0.0421875	conserved hypothetical oxidoreductase"
MMARE11_08650	0.252713	-1.98443	0.0424533	glycerol-3-phosphate dehydrogenase, GpdA1"
MMARE11_29980	0.37379	-1.4197	0.0424569	5'-3' exonuclease"
MMARE11_14200	16.0798	4.00717	0.0424629	peptide synthase"
MMARE11_23890	0.348591	-1.52039	0.0426813	ornithine carbamoyltransferase, anabolic ArgF"
MMARE11_26510	0.416478	-1.26369	0.0426931	oxidoreductase"
MMARE11_27420	0.606587	-0.721214	0.0428498	isocitrate lyase AceAb"
MMARE11_33860	0.190624	-2.39119	0.0429064	ketoacyl-acyl carrier protein synthase III"
MMARE11_03640	4.7874	2.25924	0.0429166	conserved hypothetical protein"
MMARE11_38420	4.79688	2.2621	0.0430934	conserved hypothetical protein"
MMARE11_51990	0.46748	-1.09702	0.0433942	acyltransferase"
MMARE11_38430	3.89891	1.96307	0.0433954	transmembrane ATP-binding protein ABCtransporter
MMARE11_05450	14.5927	3.86718	0.0434891	short-chain type dehydrogenase/reductase"
MMARE11_01940	3.38992	1.76125	0.043491	glycine dehydrogenase GcvB_1"
MMARE11_23220	0.341444	-1.55028	0.0435059	phosphoribosylformimino-5-aminoimidazole
MMARE11_10580	15.1658	3.92275	0.0435306	membrane-anchored serine protease (mycosin),
MMARE11_01520	12.065	3.59275	0.043844	conserved hypothetical transmembrane protein"
MMARE11_30070	0.547241	-0.869752	0.0440977	proteasome (beta subunit) PrcB"
MMARE11_43890	0.375893	-1.41161	0.0443949	transmembrane serine/threonine-protein kinase D
MMARE11_05890	0.28025	-1.83522	0.0444556	heat shock protein transcriptional repressor
MMARE11_39760	4.58198	2.19597	0.0445178	ESX-1 secretion-associated protein A, EspA"
MMARE11_48680	5.45499	2.44758	0.0445447	acyl-CoA dehydrogenase FadE33"
MMARE11_48820	11.1076	3.47348	0.0445515	conserved hypothetical secreted protein"
MMARE11_47450	0.439108	-1.18735	0.0451814	zinc-containing alcohol dehydrogenase
MMARE11_23310	2.7469	1.45781	0.0452073	anchored-membrane serine/threonine-protein
MMARE11_21590	0.435873	-1.19802	0.0452401	dehydrogenase"
MMARE11_47980	0.488416	-1.03382	0.0454845	conserved hypothetical membrane protein YrbE4B"
MMARE11_51820	0.35382	-1.49891	0.0454845	acyl-CoA dehydrogenase FadE35"
MMARE11_21560	2.75785	1.46354	0.0454845	conserved hypothetical protein"
MMARE11_09120	2.07098	1.05031	0.0455221	enoyl-CoA hydratase, EchA3"
MMARE11_16820	0.454598	-1.13734	0.0456004	conserved lipoprotein LppX"
MMARE11_39770	9.31928	3.22022	0.0457784	conserved hypothetical protein"
MMARE11_39710	8.70537	3.12191	0.0458714	acyl-CoA dehydrogenase FadE3"
MMARE11_13750	0.226081	-2.14509	0.0459632	NADH dehydrogenase I (chain I) NuoI
MMARE11_47820	3.14636	1.65368	0.045965	enoyl-CoA hydratase EchA13_1"
MMARE11_04150	1.39829	0.48366	0.0461756	iron-regulated phosphoenolpyruvate carboxykinase
MMARE11_43940	5.5423	2.47048	0.0463869	conserved hypothetical protein"
MMARE11_39780	4.54762	2.18511	0.046724	conserved hypothetical protein"
MMARE11_24950	0.403412	-1.30968	0.0467933	serine/threonine-protein kinase transcriptional
MMARE11_19260	0.60952	-0.714255	0.04689	iron-dependent repressor and activator IdeR"
MMARE11_10360	2.3775	1.24944	0.0469758	methylmalonate semialdehyde dehydrogenase, MmsA"
MMARE11_09770	0.573667	-0.801716	0.0470957	membrane glycosyl transferase"
MMARE11_14300	0.205163	-2.28516	0.0472137	two-component sensor histidine kinase DevS"
MMARE11_48810	3.71351	1.89278	0.0474264	flavodoxin reductase Hmp"
MMARE11_43430	2.16543	1.11465	0.0474546	mycobacterial persistence regulator MprA"
MMARE11_17210	2.35596	1.23632	0.0475549	transmembrane serine/threonine-protein kinase I
MMARE11_38330	6.44915	2.68911	0.0477124	fatty-acid-CoA ligase FadD35_1"
MMARE11_48640	2.87987	1.52601	0.0477641	acyl-CoA dehydrogenase FadE30"
MMARE11_46650	0.542577	-0.882101	0.0480277	transcriptional regulator"
MMARE11_00400	6.56988	2.71587	0.0481307	transcriptional regulatory protein (Whib-like),
MMARE11_16890	1.60752	0.684838	0.0481405	daunorubicin-DIM-transport integral membraneprotein ABC transporter DrrC
MMARE11_04770	6.53138	2.70739	0.0484688	transcriptional regulatory protein"
MMARE11_19540	1.57691	0.657101	0.0485447	arsenic-transport integral membrane protein
MMARE11_37880	5.52951	2.46715	0.0485803	acyl-CoA dehydrogenase FadE17_2"
MMARE11_52850	0.613644	-0.704526	0.0486681	membrane-anchored serine protease (mycosin),MycP1
MMARE11_48790	0.469142	-1.0919	0.0487716	2-hydroxy-6-OXO-6-phenylhexa-2,4-dienoate
MMARE11_43930	4.80784	2.26539	0.0487774	short-chain type dehydrogenase/reductase"
MMARE11_47470	3.43833	1.78171	0.0488012	conserved hypothetical protein"
MMARE11_16910	0.471208	-1.08556	0.0488468	daunorubicin-DIM-transport ATP-binding protein
MMARE11_44650	1.44844	0.534502	0.0488773	citrate synthase I GltA2"
MMARE11_18470	2.36236	1.24023	0.0490309	acyl-CoA dehydrogenase FadE21"
MMARE11_31850	5.59069	2.48303	0.0490856	drug-transport transmembrane ATP-binding protein
MMARE11_48270	3.42906	1.77781	0.049098	conserved hypothetical protein"
MMARE11_10910	3.48843	1.80258	0.0493225	WhiB-like regulatory protein, WhiB3"
MMARE11_19710	3.72813	1.89845	0.0493645	conserved hypothetical protein"
MMARE11_48670	3.02286	1.59591	0.0493868	acyl-CoA dehydrogenase FadE32"
MMARE11_52700	1.57409	0.654522	0.0493981	type VII secretion EccB1
MMARE11_23520	0.637086	-0.650439	0.049403	two-component system transcriptional regulator"
MMARE11_52840	0.443074	-1.17438	0.0496565	type VII secretion EccE1
MMARE11_48150	0.507255	-0.979216	0.0497186	coenzyme F420-dependent oxidoreductase"
MMARE11_03190	0.454099	-1.13892	0.0497292	oxidoreductase"
MMARE11_52210	2.00362	1.00261	0.0497344	transcriptional regulatory protein EspR
MMARE11_13730	0.354083	-1.49784	0.0498381	NADH dehydrogenase I (chain K) NuoK(NADH-ubiquinone oxidoreductase chain K)
