# Supplementary material for: Integrated transcriptomic and proteomic analysis of pathogenic mycobacteria and their esx-1 mutants reveal secretion-dependent regulation of ESX-1 substrates and WhiB6 as a transcriptional regulator
Source: PLoS One. 2019 Jan 23;14(1):e0211003. doi: 10.1371/journal.pone.0211003 (PMC6343904; doi:10.1371/journal.pone.0211003)
Supplement: S7 Table — (XLSX) [file pone.0211003.s007.xlsx]

## Sheet: ESX1_ESX1_INT (S7)
Complete list of genes of which expression is significantly changed in M. marinum eccCb1 transposon mutant strain during infection of macrophages vs growth in 7H9 culture medium. P<0.05
Gene ID	foldChange	log2FoldChange	pval	Product
MMARE11_46350	0.00663906	-7.2348	0	geranylgeranyl pyrophosphate synthase CrtE"
MMARE11_46400	0.0137775	-6.18154	0	conserved transmembrane transport protein
MMARE11_01780	0.24287	-2.04174	0	conserved hypothetical EsxB-like protein,
MMARE11_49730	11.8707	3.56933	0	hypothetical protein"
MMARE11_29140	54.4719	5.76744	0	molecular chaperone (small heat shock protein)"
MMARE11_39760	79.2534	6.3084	0	ESX-1 secretion-associated protein A, EspA"
MMARE11_13330	95.873	6.58305	0	transcriptional regulatory protein Whib-like WhiB7
MMARE11_35450	219.317	7.77688	0	integral membrane nitrite extrusion protein
MMARE11_10530	23.8529	4.57609	0	conserved hypothetical membrane protein"
MMARE11_39770	103.313	6.69087	5.55e-15	conserved hypothetical protein"
MMARE11_24450	20.7676	4.37626	2.51e-14	PPE family protein, PPE23"
MMARE11_46160	55.0993	5.78396	2.8e-14	PE-PGRS family protein"
MMARE11_13320	9.92609	3.31122	5.51e-14	hypothetical protein"
MMARE11_40510	1752.08	10.7749	1.1e-13	conserved integral membrane transport protein"
MMARE11_25880	52.5172	5.71472	2.69e-13	hypothetical protein"
MMARE11_01770	0.208995	-2.25846	3.14e-13	6 kDa culture filtrate antigen EsxA_1 (early
MMARE11_35470	66.1783	6.04829	3.48e-13	formate dehydrogenase H FdhF"
MMARE11_47130	55.2595	5.78815	4.73e-13	conserved hypothetical integral membrane
MMARE11_08940	0.0199802	-5.64528	3.4e-12	conserved hypothetical protein"
MMARE11p_00900	41.4398	5.37294	5.2e-12	hypothetical protein"
MMARE11_44970	562.429	9.13553	6.18e-12	conserved hypothetical protein"
MMARE11_36470	22.7964	4.51074	9.17e-12	enhanced intracellular survival protein Eis"
MMARE11_19270	3.84728	1.94384	1.13e-11	RNA polymerase sigma factor SigB"
MMARE11_22690	3.35178	1.74493	1.25e-11	hypothetical protein"
MMARE11_12800	40.8233	5.35132	2.59e-11	oxidoreductase"
MMARE11_46530	0.290935	-1.78123	5.95e-11	cold shock protein a, CspA"
MMARE11_46360	0.00144525	-9.43446	1.05e-10	phytoene dehydrogenase CrtI"
MMARE11_17760	406.196	8.66603	1.21e-10	conserved hypothetical membrane protein"
MMARE11_02840	57.1251	5.83605	1.33e-10	conserved hypothetical protein"
MMARE11_52330	0.070447	-3.82732	1.64e-10	conserved hypothetical protein"
MMARE11_01760	0.212134	-2.23695	2.17e-10	10 kDa culture filtrate antigen EsxB_1"
MMARE11_21230	0.20461	-2.28905	2.77e-10	integration host factor MihF"
MMARE11_05680	8.21619	3.03847	5.2e-10	aminotransferase AlaT"
MMARE11_27560	11.0064	3.46027	6.46e-10	phosphotransferase"
MMARE11_23810	184.788	7.52973	6.75e-10	PE-PGRS family protein"
MMARE11_18010	12.3474	3.62614	6.96e-10	high-affinity nickel permease, HoxN"
MMARE11_02850	13.5613	3.76142	8.26e-10	divalent cation-transport integral membrane
MMARE11_09970	18.9625	4.24508	8.99e-10	hypothetical protein"
MMARE11_19120	6.94291	2.79554	1.26e-09	GTP-binding protein HflX"
MMARE11_35610	0.15645	-2.67623	1.5e-09	EsaT-6 like protein EsxN_3"
MMARE11_04620	3.11071	1.63724	1.51e-09	acyl-CoA dehydrogenase FadE5"
MMARE11_21360	51.6066	5.68948	1.55e-09	methyltransferase"
MMARE11_06740	0.14819	-2.75448	1.66e-09	conserved hypothetical membrane protein"
MMARE11_35100	10.9669	3.45509	1.75e-09	hypothetical protein"
MMARE11_22060	0.185076	-2.43381	2.03e-09	mycobacterial invasion and intracellular
MMARE11_29150	13.5893	3.7644	2.22e-09	GTP cyclohydrolase I FolE_1"
MMARE11_10090	0.195536	-2.3545	2.34e-09	30S ribosomal protein S5, RpsE"
MMARE11_35630	0.0465814	-4.4241	2.45e-09	conserved hypothetical protein"
MMARE11_09470	0.282041	-1.82602	2.55e-09	DNA-directed RNA polymerase, beta chain, RpoC"
MMARE11_43370	9.97724	3.31864	3.1e-09	conserved hypothetical serine rich protein"
MMARE11_35620	0.112266	-3.155	4.34e-09	EsaT-6 like protein EsxP_2"
MMARE11_10910	21.9158	4.4539	4.59e-09	WhiB-like regulatory protein, WhiB3"
MMARE11_03740	0.179972	-2.47416	1.45e-08	conserved hypothetical integral membrane protein
MMARE11_39000	0.278404	-1.84475	1.6e-08	ATP synthase delta chain AtpH"
MMARE11_51810	0.0439915	-4.50663	1.87e-08	conserved hypothetical membrane protein"
MMARE11_19310	4.86029	2.28104	1.95e-08	conserved hypothetical protein"
MMARE11_03730	0.205761	-2.28096	2.34e-08	conserved hypothetical integral membrane protein
MMARE11_19300	5.12681	2.35806	3.58e-08	conserved membrane protein"
MMARE11_50450	4.42025	2.14413	3.66e-08	aspartate kinase Ask"
MMARE11_46940	8.97518	3.16594	3.84e-08	UDP-glucose-4-epimerase, CpsY"
MMARE11_30900	0.164146	-2.60695	3.99e-08	cell division protein FtsZ"
MMARE11_13670	0.0725636	-3.78461	4.17e-08	PPE family protein"
MMARE11_04720	17.79	4.15299	4.46e-08	heat shock protein Hsp"
MMARE11_04150	3.18698	1.67219	5.39e-08	iron-regulated phosphoenolpyruvate carboxykinase
MMARE11_16810	0.277323	-1.85036	5.41e-08	polyketide synthase Pks15/1"
MMARE11_46140	22.9712	4.52175	6.67e-08	'pyruvate dehydrogenase (acetyl-transferring) E1
MMARE11_35290	13.4478	3.74929	7.87e-08	ornithine aminotransferase RocD1 and RocD2"
MMARE11_34620	0.0440111	-4.50599	8.29e-08	PPE family protein, PPE5"
MMARE11_14280	0.0693432	-3.8501	1.13e-07	conserved hypothetical membrane protein"
MMARE11_02980	0.132027	-2.9211	1.17e-07	secreted antigen 85-C FbpC"
MMARE11_04780	35.7863	5.16133	1.21e-07	integral membrane nitrite extrusion protein
MMARE11_39930	25.7718	4.68772	1.44e-07	conserved hypothetical integral membrane
MMARE11_35300	31.1353	4.96048	1.68e-07	conserved hypothetical protein"
MMARE11_26490	3.77238	1.91547	1.77e-07	NADH dehydrogenase Ndh"
MMARE11_03770	0.275752	-1.85856	1.79e-07	MCE-family protein Mce1C"
MMARE11_49230	0.276456	-1.85488	1.81e-07	iron-regulated Lsr2 protein precursor"
MMARE11_22620	0.193529	-2.36938	1.93e-07	probable polyketide synthase Pks5"
MMARE11_37690	0.410415	-1.28484	2.03e-07	fatty acid synthase Fas"
MMARE11_23500	8.77964	3.13416	2.05e-07	conserved hypothetical membrane protein"
MMARE11_33970	20.2438	4.33941	2.06e-07	conserved hypothetical secreted protein"
MMARE11_07300	0.114381	-3.12809	2.07e-07	aldehyde dehydrogenase, PutA_1"
MMARE11_42610	9.34885	3.22479	2.14e-07	hypothetical membrane protein"
MMARE11_12810	18.2171	4.18722	2.15e-07	linoleoyl-CoA desaturase, DesA3"
MMARE11_46370	0.0242438	-5.36624	2.25e-07	phytoene synthase, CrtB"
MMARE11_20170	0.0344699	-4.85852	2.31e-07	conserved hypothetical protein"
MMARE11_38990	0.376911	-1.4077	2.45e-07	ATP synthase alpha chain AtpA"
MMARE11_47320	0.0432359	-4.53163	2.64e-07	conserved hypothetical protein"
MMARE11_20140	0.0826156	-3.59744	2.74e-07	long-chain-fatty-acid-CoA ligase, FadD11_1"
MMARE11_28670	22.6515	4.50154	3.11e-07	conserved protein"
MMARE11_22700	4.97184	2.31378	3.33e-07	conserved hypothetical protein"
MMARE11_39790	9.3516	3.22521	4.37e-07	transmembrane serine/threonine-protein kinase H,
MMARE11_06730	0.152599	-2.71218	4.72e-07	conserved hypothetical membrane protein"
MMARE11_03750	0.30756	-1.70106	5.15e-07	MCE-family protein Mce1A"
MMARE11_09640	0.29699	-1.75151	5.36e-07	30S ribosomal protein S7, RpsG"
MMARE11_50550	0.236209	-2.08186	5.44e-07	conserved protein"
MMARE11_35690	0.0533156	-4.2293	5.58e-07	EsaT-6 like protein EsxP_3"
MMARE11_35700	0.0533156	-4.2293	5.85e-07	EsaT-6 like protein EsxP_4"
MMARE11_33130	0.0252736	-5.30622	5.86e-07	conserved hypothetical protein"
MMARE11_36140	10.3207	3.36747	6.3e-07	conserved hypothetical protein"
MMARE11_51340	0.206386	-2.27658	6.49e-07	19 kDa lipoprotein antigen precursor LpqH"
MMARE11_29170	0.0813204	-3.62024	6.51e-07	ferredoxin FdxA_2"
MMARE11_22530	0.243903	-2.03562	6.53e-07	conserved hypothetical protein"
MMARE11_13340	4.86435	2.28225	6.61e-07	conserved ATP-binding protein ABC transporter"
MMARE11_10520	44.2812	5.46862	7e-07	PPE family protein"
MMARE11_52210	7.99697	2.99945	7.11e-07	conserved protein"
MMARE11_31800	0.182757	-2.452	7.95e-07	multimeric flavodoxin WrbA"
MMARE11_42440	10.8161	3.43511	8.88e-07	conserved hypothetical protein"
MMARE11_15540	8.819	3.14061	9.12e-07	conserved hypothetical protein"
MMARE11_38970	0.377666	-1.40482	9.22e-07	ATP synthase beta chain AtpD"
MMARE11_21280	6.02084	2.58997	9.4e-07	conserved hypothetical secreted protein"
MMARE11_43640	4.90711	2.29487	1.01e-06	conserved hypothetical protein"
MMARE11_24820	0.181611	-2.46108	1.11e-06	'RNA chaperone/anti-terminator'"
MMARE11_10070	0.229238	-2.12508	1.14e-06	50S ribosomal protein L6, RplF"
MMARE11_49940	0.136108	-2.87718	1.21e-06	transcriptional regulatory protein Whib-like
MMARE11_09860	0.29547	-1.75892	1.27e-06	50S ribosomal protein L3 RplC"
MMARE11_10080	0.17285	-2.53241	1.31e-06	50S ribosomal protein L18, RplR"
MMARE11_28260	4.01011	2.00364	1.32e-06	hypothetical protein"
MMARE11_04850	0.237473	-2.07417	1.36e-06	fatty-acid-CoA ligase FadD2"
MMARE11_43320	0.300932	-1.73249	1.42e-06	conserved hypothetical transmembrane protein"
MMARE11_19330	9.74254	3.2843	1.53e-06	conserved hypothetical protein"
MMARE11_13700	0.197223	-2.3421	1.64e-06	NADH dehydrogenase I (chain N) NuoN
MMARE11_13720	0.156961	-2.67152	1.67e-06	NADH dehydrogenase I (chain L) NuoL
MMARE11_33990	0.226051	-2.14528	1.67e-06	conserved hypothetical protein"
MMARE11_51420	7.90261	2.98233	1.98e-06	O-methyltransferase"
MMARE11_39100	0.257511	-1.95729	2.08e-06	transcription termination factor Rho"
MMARE11_47140	20.3376	4.34607	2.1e-06	conserved hypothetical protein"
MMARE11_05860	2.67601	1.42008	2.13e-06	chaperone protein DnaK"
MMARE11_29480	0.373036	-1.42261	2.15e-06	polyketide synthase, Pks12"
MMARE11_35670	0.129423	-2.94983	2.25e-06	EsaT-6 like protein EsxN_4"
MMARE11_35680	0.129423	-2.94983	2.35e-06	EsaT-6 like protein EsxN_5"
MMARE11_38980	0.356976	-1.4861	2.87e-06	ATP synthase gamma chain AtpG"
MMARE11_46800	10.1874	3.34871	2.89e-06	conserved hypothetical protein"
MMARE11_10360	7.50245	2.90736	2.91e-06	methylmalonate semialdehyde dehydrogenase, MmsA"
MMARE11_03760	0.32346	-1.62834	2.96e-06	MCE-family protein Mce1B"
MMARE11_25890	16.7318	4.06452	3.15e-06	PPE family protein, PPE25"
MMARE11_21880	2.75891	1.4641	3.28e-06	conserved protein"
MMARE11_36150	12.532	3.64755	3.36e-06	conserved membrane permease"
MMARE11_29720	0.0241114	-5.37414	3.57e-06	conserved membrane transport protein, MmpS4_1"
MMARE11_35440	36.9583	5.20782	3.71e-06	methylase"
MMARE11_29500	2.59637	1.3765	3.87e-06	conserved hypothetical protein"
MMARE11_22550	0.154379	-2.69545	4.02e-06	glycosyltransferase, WcaA"
MMARE11_07780	0.331901	-1.59117	4.08e-06	UDP-glucose 4-epimerase GalE2"
MMARE11_41630	18.3891	4.20078	4.28e-06	conserved hypothetical protein"
MMARE11_43620	0.268361	-1.89775	4.53e-06	succinyl-CoA synthetase (alpha chain) SucD"
MMARE11_49880	0.400581	-1.31983	4.66e-06	conserved regulatory protein"
MMARE11_40550	4.46727	2.15939	4.94e-06	transcriptional regulatory protein"
MMARE11_26250	0.385071	-1.3768	5.99e-06	conserved protein"
MMARE11_22070	0.136477	-2.87327	7.83e-06	mycobacterial invasion and intracellular
MMARE11_22080	0.28354	-1.81837	8.12e-06	transcriptional regulatory protein, MoxR1"
MMARE11_22540	0.186786	-2.42054	8.14e-06	acetolactate synthase (large subunit) IlvB1_3"
MMARE11_33230	24.2183	4.59802	8.31e-06	phosphate-transport permease PitB"
MMARE11_09660	0.409673	-1.28746	8.33e-06	iron-regulated elongation factor Ef-tu, Tuf"
MMARE11_43630	0.352493	-1.50433	8.5e-06	succinyl-CoA synthetase (beta chain) SucC"
MMARE11_46390	0.0131501	-6.24878	8.9e-06	lycopene cyclase, CrtYd"
MMARE11_26860	7.57479	2.92121	8.94e-06	conserved hypothetical amidase"
MMARE11_09910	0.218035	-2.19737	9.37e-06	50S ribosomal protein L22, RplV"
MMARE11_12910	16.9249	4.08108	9.55e-06	conserved hypothetical membrane protein"
MMARE11_37330	0.0856472	-3.54545	9.97e-06	acyl-CoA dehydrogenase FadE19"
MMARE11_36460	18.806	4.23312	1.01e-05	conserved hypothetical membrane protein"
MMARE11_13780	0.196545	-2.34707	1.1e-05	NADH dehydrogenase I (chain F) NuoF
MMARE11_23190	5.27476	2.3991	1.13e-05	histidinol-phosphate aminotransferase HisC1"
MMARE11_19320	4.80257	2.26381	1.16e-05	conserved hypothetical protein"
MMARE11_12820	4.95244	2.30814	1.17e-05	linoleoyl-CoA desaturase, DesA3_1"
MMARE11_30890	0.204065	-2.2929	1.23e-05	conserved membrane protein YfiH"
MMARE11_13740	0.111021	-3.1711	1.33e-05	NADH dehydrogenase I (chain J) NuoJ
MMARE11_16050	0.280163	-1.83566	1.35e-05	electron transfer flavoprotein (beta-subunit)
MMARE11_29010	16.9158	4.0803	1.39e-05	transcriptional regulatory protein (probably
MMARE11_08660	0.0608629	-4.03829	1.39e-05	trypsin-like serine protease"
MMARE11_07000	20.611	4.36534	1.4e-05	MFS transporter"
MMARE11_09650	0.559164	-0.838657	1.41e-05	elongation factor G, FusA1"
MMARE11_31810	0.114411	-3.1277	1.45e-05	conserved hypothetical protein"
MMARE11_34190	0.211908	-2.23849	1.5e-05	hypothetical protein"
MMARE11_01310	5.6656	2.50223	1.51e-05	conserved hypothetical membrane protein"
MMARE11_25800	7.64226	2.934	1.53e-05	conserved hypothetical membrane protein"
MMARE11_33890	0.108485	-3.20443	1.63e-05	conserved hypothetical membrane protein"
MMARE11_21970	0.347619	-1.52442	1.68e-05	cation transporter p-type ATPase D CtpD"
MMARE11_51890	0.552816	-0.85513	1.74e-05	secreted antigen 85-A FbpA"
MMARE11_30770	0.340841	-1.55283	1.79e-05	non-ribosomal peptide synthetase"
MMARE11_26260	0.32733	-1.61118	1.79e-05	conserved hypothetical regulatory protein"
MMARE11_13770	0.304189	-1.71696	1.86e-05	NADH dehydrogenase I (chain G) NuoG
MMARE11_11960	0.211641	-2.24031	1.92e-05	metal cation transporting p-type ATPase CtpH_1"
MMARE11_08410	3.17604	1.66723	1.97e-05	low-affinity inorganic phosphate transporter,
MMARE11_52140	2.34403	1.22899	2e-05	bacterioferritin BfrB"
MMARE11_22760	0.203051	-2.30009	2.01e-05	conserved hypothetical protein"
MMARE11_22010	3.07995	1.62291	2.13e-05	ATP-binding protein ABC transporter"
MMARE11_17300	4.39506	2.13588	2.19e-05	conserved alanine rich lipoprotein LppW"
MMARE11_22490	0.187908	-2.4119	2.25e-05	conserved hypothetical transmembrane protein"
MMARE11_42690	0.465027	-1.10461	2.41e-05	EsaT-6 like protein EsxN_1"
MMARE11_32450	6.1024	2.60938	2.42e-05	flavoprotein"
MMARE11_31670	0.148073	-2.75562	2.56e-05	conserved hypothetical MbtH-like protein"
MMARE11_30870	0.378661	-1.40102	2.59e-05	conserved hypothetical protein"
MMARE11_23490	4.42607	2.14603	2.67e-05	integral membrane cytochrome D ubiquinol oxidase
MMARE11_23020	4.47039	2.1604	2.69e-05	conserved hypothetical membrane protein"
MMARE11_05950	2.78805	1.47926	2.8e-05	endopeptidase ATP binding protein (chain B)
MMARE11_03780	0.391227	-1.35392	2.83e-05	MCE-family protein Mce1D"
MMARE11_44980	11.4775	3.52074	2.87e-05	conserved hypothetical protein"
MMARE11_29130	14.7371	3.88138	2.9e-05	heat shock protein transcriptional repressor
MMARE11_37700	0.182682	-2.4526	2.96e-05	conserved hypothetical secreted protein"
MMARE11_08110	0.232493	-2.10474	2.97e-05	metal cation-transporting p-type ATPase F, CtpF"
MMARE11_18910	0.346973	-1.52711	3.24e-05	cell division transmembrane protein FtsK"
MMARE11_15000	5.84806	2.54796	3.25e-05	conserved hypothetical protein"
MMARE11_46150	26.0656	4.70408	3.28e-05	integral membrane protein"
MMARE11_03790	0.37548	-1.41319	3.29e-05	MCE-family lipoprotein LprK (MCE-family
MMARE11_10650	0.346437	-1.52933	3.31e-05	ribosomal protein S9, RpsI"
MMARE11_24440	5.34863	2.41917	3.32e-05	PPE family protein"
MMARE11_31570	2.49125	1.31687	3.43e-05	branched-chain amino acid transaminase IlvE"
MMARE11_39010	0.461869	-1.11445	3.47e-05	ATP synthase B chain AtpF"
MMARE11_49620	0.343852	-1.54014	3.55e-05	cold shock protein A CspA_1"
MMARE11p_00890	105.134	6.71608	3.58e-05	hypothetical protein"
MMARE11_01750	0.530962	-0.91332	3.71e-05	PPE family protein"
MMARE11_14990	11.265	3.49377	3.79e-05	oxidoreductase"
MMARE11_01070	15.9522	3.99568	4.09e-05	conserved hypothetical protein"
MMARE11_25700	0.29527	-1.75989	4.13e-05	conserved hypothetical protein"
MMARE11_19130	5.82507	2.54228	4.55e-05	acyl-CoA dehydrogenase FadE20"
MMARE11_40390	0.263259	-1.92544	4.58e-05	conserved protein"
MMARE11_05020	0.324691	-1.62286	4.6e-05	PPE family protein, PPE4"
MMARE11_00880	6.87728	2.78184	4.62e-05	non-ribosomal peptide synthetase"
MMARE11_36750	0.476518	-1.0694	4.68e-05	ribonuclease E Rne"
MMARE11_40790	18.2214	4.18756	4.71e-05	integral membrane nitrite extrusion protein
MMARE11_07770	0.345352	-1.53386	4.81e-05	conserved hypothetical protein"
MMARE11_21870	3.82133	1.93408	4.82e-05	transcriptional regulatory protein"
MMARE11_25050	0.313516	-1.67339	4.82e-05	conserved secreted protein"
MMARE11_41570	0.230794	-2.11532	4.88e-05	6-phosphogluconate dehydrogenase,
MMARE11_50470	4.30409	2.10571	5.03e-05	conserved hypothetical protein"
MMARE11_44000	3.52692	1.81841	5.15e-05	DNA binding domain, excisionase family"
MMARE11_21240	0.255522	-1.96848	5.25e-05	guanylate kinase Gmk"
MMARE11_02940	0.337347	-1.56769	5.28e-05	serine protease PepA"
MMARE11_13820	0.172439	-2.53584	5.91e-05	NADH dehydrogenase I (chain B) NuoB
MMARE11_52640	2.57859	1.36658	5.94e-05	conserved hypothetical regulatory protein"
MMARE11_11400	0.338645	-1.56215	6.02e-05	Fatty acyl-AMP ligase FadD28_1 and polyketide
MMARE11_03800	0.379793	-1.39671	6.05e-05	MCE-family protein Mce1F"
MMARE11_09460	0.506702	-0.980791	6.2e-05	DNA-directed RNA polymerase, beta subunit, RpoB"
MMARE11_21790	0.0901657	-3.47128	6.31e-05	trehalose-6-phosphate phosphatase OtsB1"
MMARE11_10990	0.342583	-1.54547	6.48e-05	cholesterol oxidase precursor ChoD"
MMARE11_22310	0.308845	-1.69505	6.52e-05	UDP-glucose 6-dehydrogenase, UdgL"
MMARE11_39450	3.22579	1.68965	6.63e-05	carbonic anhydrase"
MMARE11_04980	2.71832	1.44271	6.88e-05	conserved protein"
MMARE11_37200	0.181127	-2.46493	7.05e-05	'tRNA-Arg(tct)'"
MMARE11_22560	0.185326	-2.43186	7.28e-05	nucleotidyltransferase"
MMARE11_28270	3.87356	1.95366	7.43e-05	conserved hypothetical membrane protein"
MMARE11_22710	3.2283	1.69077	7.55e-05	rhamnosyl transferase WbbL2"
MMARE11_04730	10.9835	3.45727	7.59e-05	nitrite reductase [NAD(P)H] large subunit [fad
MMARE11_39200	0.210802	-2.24604	7.86e-05	aldehyde dehydrogenase"
MMARE11_29710	0.167749	-2.57562	8.51e-05	conserved transmembrane transport protein,
MMARE11_01320	4.37725	2.13003	8.65e-05	transcriptional regulator"
MMARE11_34070	0.0759283	-3.71922	9.2e-05	conserved hypothetical protein"
MMARE11_17010	0.35099	-1.5105	9.23e-05	conserved protein"
MMARE11_36920	0.414401	-1.2709	9.61e-05	'tRNA-Gly(tcc)'"
MMARE11_33870	0.0628061	-3.99295	9.72e-05	conserved hypothetical protein"
MMARE11_21210	0.347899	-1.52326	9.84e-05	carbamoyl-phosphate synthase large chain CarB"
MMARE11_10110	0.37683	-1.40801	9.99e-05	50S ribosomal protein L15, RplO"
MMARE11_34050	0.176575	-2.50165	0.00010113	conserved hypothetical protein"
MMARE11_44720	2.56709	1.36013	0.000103213	conserved hypothetical protein"
MMARE11_04790	5.6738	2.50432	0.000103304	aminoglycoside 2'-N-acetyltransferase Aac"
MMARE11_47960	0.220317	-2.18235	0.000104465	MCE-family protein Mce4B"
MMARE11_48210	4.40147	2.13799	0.000104808	conserved hypothetical secreted protein"
MMARE11_48220	4.40147	2.13799	0.000104873	conserved hypothetical membrane protein"
MMARE11_24300	0.310147	-1.68898	0.00010503	conserved hypothetical membrane protein"
MMARE11_16800	0.335827	-1.57421	0.000107372	fatty-acid-CoA ligase FadD22"
MMARE11_10830	1.83123	0.872816	0.000107486	10 kDa chaperone (GroES)"
MMARE11_09920	0.250755	-1.99565	0.00010963	30S ribosomal protein S3, RpsC"
MMARE11_50540	0.233343	-2.09947	0.000111797	recombination protein RecR"
MMARE11_12650	0.257394	-1.95795	0.000112985	two-component sensory transduction
MMARE11_32010	5.06654	2.341	0.000113635	3-methyl-2-oxobutanoate hydroxymethyltransferase
MMARE11_03720	0.40818	-1.29272	0.000114933	fatty-acid-CoA ligase FadD5"
MMARE11_11040	6.85067	2.77624	0.000116672	conserved hypothetical protein"
MMARE11_36640	0.308426	-1.69701	0.000117643	adenylate or guanylate cyclase"
MMARE11_12000	0.133512	-2.90496	0.000118184	arylsulfatase AtsB (aryl-sulfate
MMARE11_03830	0.188433	-2.40788	0.000121351	conserved Mce associated protein"
MMARE11_29990	0.404508	-1.30576	0.000121654	conserved membrane protein"
MMARE11_07350	0.412387	-1.27793	0.000121965	dihydrolipoamide dehydrogenase Lpd"
MMARE11_52370	0.575939	-0.796011	0.000129051	ferredoxin-dependent glutamate synthase [NADPH]
MMARE11_04950	9.12375	3.18963	0.00013001	PPE family protein, PPE3"
MMARE11_16140	14.6903	3.8768	0.000132802	methyltransferase"
MMARE11_53130	0.119233	-3.06814	0.000136324	conserved protein"
MMARE11_15530	0.110743	-3.17472	0.000136766	hypothetical protein"
MMARE11_51880	0.394523	-1.34182	0.000137558	secreted Mpt51/Mpb51 antigen protein FbpD"
MMARE11_26030	17.2426	4.1079	0.000138539	PPE family protein, PPE31"
MMARE11_23180	2.5499	1.35044	0.000140219	histidinol dehydrogenase HisD"
MMARE11_22640	0.304789	-1.71412	0.00014694	conserved transmembrane transport protein, MmpL
MMARE11_16970	2.47067	1.3049	0.000147281	fatty acyl-AMP ligase FadD26"
MMARE11_05490	0.306137	-1.70775	0.000151906	tRNA-Gly"
MMARE11_07090	1.40594	0.491538	0.000156688	60 kDa chaperonin 2 GroEL2"
MMARE11_47920	0.36421	-1.45716	0.000162475	MCE-family protein Mce4F"
MMARE11_24070	0.421946	-1.24487	0.00016273	long-chain acyl-CoA synthase"
MMARE11_18530	0.469741	-1.09006	0.000168368	bifunctional protein polyribonucleotide
MMARE11_13800	0.35806	-1.48173	0.000170217	NADH dehydrogenase I (chain D) NuoD
MMARE11_28500	0.132648	-2.91433	0.000170438	conserved hypothetical secreted protein"
MMARE11_23690	7.05527	2.8187	0.000171701	conserved hypothetical membrane protein"
MMARE11_41640	13.9681	3.80407	0.000173257	conserved hypothetical exported protein"
MMARE11_04270	0.183361	-2.44724	0.000181363	enoyl-CoA hydratase EchA1"
MMARE11_31910	2.94543	1.55848	0.000184174	glutamine synthetase GlnA1"
MMARE11_23560	0.599978	-0.737019	0.000188685	ribosomal protein S1 RpsA"
MMARE11_16940	0.482479	-1.05146	0.000188688	phenolpthiocerol synthesis type-I polyketide
MMARE11_47760	2.38183	1.25207	0.000189627	conserved hypothetical membrane protein CpsA"
MMARE11_26740	2.27807	1.18781	0.00019081	trehalose synthase TreS_1"
MMARE11_03810	0.311008	-1.68498	0.000199977	conserved Mce associated membrane protein"
MMARE11_22330	0.362169	-1.46527	0.000202216	glycosyl transferase"
MMARE11_09220	0.396632	-1.33413	0.000204984	50S ribosomal protein L11, RplK"
MMARE11_09420	2.09805	1.06905	0.000218375	50S ribosomal protein L7/L12, RplL"
MMARE11_25990	0.521311	-0.939783	0.000224259	conserved membrane protein"
MMARE11_30850	0.447004	-1.16164	0.000228211	conserved secreted antigen Wag31"
MMARE11_35540	0.15595	-2.68085	0.000228737	serine acetyltransferase CysE"
MMARE11_31350	1.87387	0.906019	0.000229283	conserved hypothetical secreted protein"
MMARE11_01500	20.3827	4.34927	0.000229484	conserved protein"
MMARE11_43150	0.156726	-2.67369	0.000231239	PPE family protein"
MMARE11_49220	0.67423	-0.568687	0.000236456	ATP-dependent protease ATP-binding subunit
MMARE11_06750	0.373646	-1.42026	0.000241583	lipoprotein aminopeptidase LpqL"
MMARE11_34140	0.0569185	-4.13496	0.000243456	conserved hypothetical protein"
MMARE11_19340	5.0313	2.33093	0.00024394	PE-PGRS family protein"
MMARE11_15940	0.305499	-1.71076	0.00024784	conserved transmembrane transport protein"
MMARE11_10060	0.311037	-1.68484	0.000248734	30S ribosomal protein S8, RpsH"
MMARE11_30740	0.214466	-2.22118	0.000251795	conserved protein MbtH"
MMARE11_35710	0.0473721	-4.39982	0.000252681	PPE family protein"
MMARE11_35720	0.0473721	-4.39982	0.00025687	PPE family protein"
MMARE11_14320	0.128992	-2.95464	0.000258253	conserved hypothetical protein"
MMARE11_04160	2.91867	1.54531	0.000261936	fatty-acid-CoA ligase FadD4"
MMARE11_05160	0.37416	-1.41827	0.000265416	conserved exported protein"
MMARE11_46460	11.752	3.55483	0.000266043	conserved hypothetical transmembrane protein"
MMARE11_24430	6.34553	2.66574	0.000266257	integral membrane drug efflux protein"
MMARE11_15910	0.130734	-2.93529	0.000275343	conserved membrane protein"
MMARE11_36120	0.0905999	-3.46435	0.000276887	conserved hypothetical protein"
MMARE11_48860	17.2131	4.10544	0.000277474	conserved hypothetical membrane protein"
MMARE11_32330	0.440972	-1.18124	0.000281089	conserved protein"
MMARE11_03840	0.250358	-1.99794	0.000288374	conserved Mce associated membrane protein"
MMARE11_10720	2.31388	1.21032	0.000291121	glucosamine-fructose-6-phosphate
MMARE11_22770	0.336244	-1.57242	0.000295073	conserved polyketide synthase associated protein
MMARE11_03990	2.81161	1.4914	0.000303258	conserved secretory protein"
MMARE11_00130	4.91985	2.29861	0.00030369	conserved hypothetical membrane protein"
MMARE11_42770	0.413223	-1.27501	0.000311117	enolase Eno"
MMARE11_24570	0.23624	-2.08167	0.000320414	'tRNA-Pro(ggg)'"
MMARE11_16680	0.413496	-1.27405	0.000322625	pyruvate carboxylase Pca"
MMARE11_42210	6.04189	2.595	0.000328724	conserved hypothetical protein"
MMARE11_38010	0.287127	-1.80024	0.000328796	conserved hypothetical alanine-rich protein"
MMARE11_32220	11.1823	3.48314	0.00032943	hypothetical protein"
MMARE11_28950	0.0949601	-3.39653	0.000335175	PE-PGRS family protein"
MMARE11_21900	2.18196	1.12563	0.000342843	conserved ATP-binding protein ABC transporter"
MMARE11_16820	0.305727	-1.70968	0.000343399	conserved lipoprotein LppX"
MMARE11_36680	6.35561	2.66803	0.000354216	cytochrome P450 268A2 Cyp268A2"
MMARE11_40650	6.36585	2.67035	0.000357407	proline dehydrogenase, PutA"
MMARE11_27550	2.82197	1.4967	0.000357493	acyl-CoA ligase FadD31"
MMARE11_36760	0.360819	-1.47065	0.000357937	nucleoside diphosphate kinase NdkA"
MMARE11_21630	0.385291	-1.37598	0.000359846	triosephosphate isomerase Tpi"
MMARE11_34680	0.174362	-2.51984	0.000365739	conserved hypothetical membrane protein"
MMARE11_44320	5.85227	2.549	0.000367907	conserved hypothetical protein"
MMARE11_35190	14.7739	3.88498	0.000370394	conserved hypothetical protein"
MMARE11_28130	4.82771	2.27134	0.000372449	hypothetical protein"
MMARE11_22270	0.257459	-1.95759	0.000372712	conserved hypothetical esterase LipL"
MMARE11_30880	0.302536	-1.72482	0.00038141	conserved protein"
MMARE11_16930	0.385264	-1.37608	0.000393311	phenolpthiocerol synthesis type-I polyketide
MMARE11_22110	0.28034	-1.83475	0.000395335	3-oxoacyl-[acyl-carrier protein] reductase,
MMARE11_35480	4.15625	2.05528	0.000401476	adenylate cyclase"
MMARE11_16470	0.421261	-1.24722	0.000409955	DNA-binding protein Hu, HupB"
MMARE11_50880	0.37341	-1.42117	0.000411574	conserved hypothetical protein"
MMARE11_16060	0.312157	-1.67966	0.000418324	electron transfer flavoprotein (alpha-subunit)
MMARE11_01490	28.8206	4.84903	0.000433979	conserved hypothetical transmembrane protein"
MMARE11_38960	0.448879	-1.1556	0.000435715	ATP synthase epsilon chain AtpC"
MMARE11_47930	0.340102	-1.55596	0.000437294	MCE-family lipoprotein LprN"
MMARE11_00100	0.144646	-2.7894	0.000439293	conserved hypothetical protein"
MMARE11_23140	0.28446	-1.8137	0.00044058	quinolinate synthetase NadA"
MMARE11_24960	0.0898031	-3.47709	0.000440892	conserved hypothetical protein"
MMARE11_43440	2.48971	1.31598	0.000441035	50S ribosomal protein L32 RpmF"
MMARE11_09760	0.361961	-1.46609	0.000441798	Creatinine amidohydrolase"
MMARE11_51850	0.570461	-0.8098	0.000447439	polyketide synthase Pks13"
MMARE11_37130	0.488813	-1.03265	0.000460185	ATP-binding component of an ABC transporter"
MMARE11_18230	0.331653	-1.59225	0.000461323	ribosome-binding factor a RbfA"
MMARE11_05850	2.58964	1.37275	0.000462131	L-asparagine permease AnsP1_1"
MMARE11_51480	0.234204	-2.09416	0.000469269	enoyl-CoA hydratase, EchA21"
MMARE11_35270	4.43708	2.14961	0.000475748	conserved hypothetical protein"
MMARE11_21680	5.43763	2.44298	0.000480141	protein-export membrane protein (translocase
MMARE11_43030	0.33826	-1.5638	0.000493428	conserved hypothetical membrane protein"
MMARE11_31820	0.146323	-2.77278	0.000493692	conserved hypothetical protein"
MMARE11_43380	8.04655	3.00837	0.000494431	conserved hypothetical membrane protein"
MMARE11_22660	0.425097	-1.23414	0.000494955	polyketide synthase, Pks5_1"
MMARE11_51380	0.140831	-2.82796	0.000508827	conserved hypothetical protein"
MMARE11_31560	2.7445	1.45654	0.000510889	conserved hypothetical integral membrane
MMARE11_25140	21.9084	4.45341	0.000515794	hypothetical membrane protein"
MMARE11_50480	2.4475	1.29131	0.000530314	2-isopropylmalate synthase LeuA"
MMARE11_13550	0.218383	-2.19507	0.000532674	non-heme haloperoxidase Hpx"
MMARE11_43680	4.22814	2.08002	0.000535519	conserved hypothetical protein"
MMARE11_52700	2.53199	1.34027	0.000558147	conserved membrane protein"
MMARE11_01370	5.25684	2.39419	0.000560809	transcriptional regulatory protein (probably
MMARE11_10950	2.25485	1.17303	0.000567415	conserved hypothetical protein"
MMARE11_10510	27.5191	4.78236	0.000574788	PPE family protein"
MMARE11_07940	0.406535	-1.29855	0.00058047	uroporphyrin-III C-methyltransferase HemD"
MMARE11_31830	0.319105	-1.64789	0.000580961	acetolactate synthase (large subunit) IlvB1_2"
MMARE11p_00050	3.86211	1.94939	0.000582248	'Fic/DOC family protein'"
MMARE11_14620	0.0821616	-3.60539	0.000589078	conserved hypothetical protein"
MMARE11_23150	0.291053	-1.78065	0.000593227	l-aspartate oxidase NadB"
MMARE11_22630	0.442778	-1.17535	0.000610109	fatty acyl-AMP ligase FadD25"
MMARE11_10560	3.7135	1.89278	0.000610764	cutinase precursor, Cut3"
MMARE11_32050	0.116119	-3.10632	0.000614243	ribonuclease P RNA"
MMARE11_12110	6.55136	2.71179	0.000614824	L-lysine-epsilon aminotransferase Lat"
MMARE11_10870	0.213061	-2.23066	0.000615655	PPE family protein"
MMARE11_40130	9.10844	3.1872	0.00061725	GabA permease GabP_1"
MMARE11_25960	0.448624	-1.15642	0.000617327	conserved protein"
MMARE11_20180	0.0863522	-3.53362	0.000627675	conserved transmembrane alanine and leucine rich
MMARE11_01730	1.81699	0.861554	0.000628544	conserved hypothetical membrane protein"
MMARE11_22570	0.286067	-1.80557	0.000629289	predicted pyridoxal phosphate-dependent enzyme"
MMARE11_37570	2.05212	1.03711	0.000637823	tRNA-Lys"
MMARE11_06760	0.255584	-1.96813	0.000641317	lipoprotein aminopeptidase LpqL_1"
MMARE11_20620	0.401067	-1.31809	0.000644288	protein-export membrane protein SecF"
MMARE11_19210	3.89497	1.96161	0.00064659	conserved hypothetical hydrolase"
MMARE11_13760	0.300224	-1.73589	0.000657696	NADH dehydrogenase I (chain H) NuoH
MMARE11_47630	0.292927	-1.77139	0.000661562	PE-PGRS family protein"
MMARE11_19740	5.52805	2.46677	0.000662109	conserved secreted protein"
MMARE11_13500	0.0691853	-3.85339	0.000694021	hypothetical protein"
MMARE11_36170	0.459733	-1.12113	0.000698489	ferredoxin-dependent nitrite reductase, NirA_2"
MMARE11_21350	3.06655	1.61662	0.000698689	transcriptional regulatory protein"
MMARE11_31660	0.204148	-2.29231	0.000704253	conserved transmembrane transport protein-MmpL
MMARE11_06950	0.364641	-1.45545	0.000704514	conserved hypothetical protein"
MMARE11_47330	0.293727	-1.76745	0.0007095	serine/threonine-protein kinase PknF_2"
MMARE11_32020	3.72278	1.89638	0.000712711	conserved hypothetical membrane protein"
MMARE11_26070	7.28323	2.86458	0.000713912	Mg2+ transport p-type ATPase C MgtC"
MMARE11_15690	2.70259	1.43434	0.000736255	conserved protein"
MMARE11_45670	12.1074	3.59781	0.000741634	transcriptional regulatory protein (possibly
MMARE11_28140	2.21843	1.14954	0.000756782	PE family protein"
MMARE11_05620	14.5123	3.85921	0.000757396	UDP-glucose dehydrogenase UdgA"
MMARE11_09770	0.437243	-1.19349	0.000775333	membrane glycosyl transferase"
MMARE11_10100	0.19229	-2.37865	0.000781974	50S ribosomal protein L30, RpmD"
MMARE11_51410	10.1664	3.34573	0.000784757	PE-PGRS family protein"
MMARE11_00740	0.416875	-1.26231	0.000788142	50S ribosomal protein L9 RplI"
MMARE11_36060	4.38555	2.13276	0.00079337	acetyl hydrolase MbtJ"
MMARE11_31700	0.396039	-1.33629	0.000796473	non-ribosomal peptide synthetase"
MMARE11_34670	0.198964	-2.32942	0.000809903	conserved proline, glycine, valine-rich secreted
MMARE11_22320	0.432143	-1.21042	0.000831725	UDP-glucose 4-epimerase, GalE5"
MMARE11_42010	2.7258	1.44668	0.000837305	hemolysin-like protein"
MMARE11_26990	2.41539	1.27226	0.000844855	conserved hypothetical protein"
MMARE11_52630	3.93853	1.97766	0.00084779	conserved hypothetical protein"
MMARE11_16630	3.21918	1.68669	0.000858921	oxidoreductase"
MMARE11_52690	1.7095	0.773574	0.000870904	conserved hypothetical membrane protein"
MMARE11_42680	0.641912	-0.639553	0.000872023	EsaT-6 like protein EsxP"
MMARE11_33450	6.39708	2.67741	0.000882984	transcriptional regulatory protein (probably
MMARE11_30230	2.07317	1.05184	0.000891214	dihydrolipoamide dehydrogenase Lpd_1"
MMARE11_33140	0.065128	-3.94058	0.000897456	NADH-dependent glutamate synthase (small
MMARE11_24220	4.69827	2.23213	0.000902648	putative domain protein"
MMARE11_13840	0.419914	-1.25183	0.000930315	PPE family protein"
MMARE11_46130	2.56271	1.35767	0.000937185	sensory histidine kinase UhpB"
MMARE11_41200	1.78651	0.837147	0.000941293	conserved hypothetical protein"
MMARE11_30390	4.85225	2.27865	0.00094806	conserved hypothetical protein"
MMARE11_51350	0.33603	-1.57334	0.00098215	two-component sensor kinase TcrY"
MMARE11_16920	0.565626	-0.822079	0.000982423	phenolpthiocerol synthesis type-I polyketide
MMARE11_04200	0.150805	-2.72925	0.000985371	conserved protein"
MMARE11_37350	0.217286	-2.20233	0.000988455	acetyl-/propionyl-CoA carboxylase (beta subunit)
MMARE11_49410	0.103052	-3.27856	0.000989895	EsaT-6 like protein EsxN_2"
MMARE11_30610	8.45942	3.08056	0.000996516	hypothetical protein"
MMARE11_48660	5.10865	2.35294	0.000998946	acyl-CoA dehydrogenase FadE31"
MMARE11_22090	0.390102	-1.35808	0.0010002	conserved protein"
MMARE11_09950	0.473717	-1.0779	0.0010212	30S ribosomal protein S17, RpsQ"
MMARE11_07420	2.66806	1.41579	0.00102477	isocitrate lyase Icl"
MMARE11_26340	0.552773	-0.855241	0.00103534	malate synthase G GlcB"
MMARE11_40640	6.11296	2.61187	0.0010389	transcriptional regulator"
MMARE11_22580	0.17985	-2.47514	0.00104448	UDP-glucose 4-epimerase, GalE6"
MMARE11_25910	3.30834	1.72611	0.00105514	PPE family protein, PPE26"
MMARE11_21690	3.31378	1.72848	0.00106558	phosphoenolpyruvate carboxylase, Ppc"
MMARE11_48650	8.9731	3.16561	0.00109109	fatty-acid-CoA ligase FadD3"
MMARE11_30930	0.302017	-1.7273	0.00109477	UDP-N-acetylglucosamine-N-acetylmuramyl-(pentapeptide)
MMARE11_13710	0.36195	-1.46614	0.00109771	NADH dehydrogenase I (chain M) NuoM
MMARE11_44700	0.365737	-1.45112	0.00110592	conserved protein"
MMARE11_06050	0.219452	-2.18802	0.00110601	carbon monoxyde dehydrogenase (medium chain),
MMARE11_42100	0.385921	-1.37362	0.00111853	cystathionine beta-synthase Cbs"
MMARE11_09210	0.57432	-0.800074	0.00113552	transcription antitermination protein, NusG"
MMARE11_00090	0.140008	-2.83641	0.00116092	transcriptional regulator"
MMARE11_09850	0.368029	-1.44211	0.00117161	30S ribosomal protein S10, RpsJ"
MMARE11_29020	5.28031	2.40062	0.00118243	conserved hypothetical protein"
MMARE11_07500	2.7808	1.4755	0.00118329	conserved transmembrane protein"
MMARE11_10640	0.567151	-0.818195	0.00123231	50S ribosomal protein L13, RplM"
MMARE11_28350	0.556417	-0.845763	0.00123293	catalase-peroxidase-peroxynitritase T KatG"
MMARE11_15640	0.337724	-1.56608	0.00124331	transcriptional regulatory protein (probably
MMARE11_37320	0.137028	-2.86745	0.0012589	conserved protein"
MMARE11_30920	0.375344	-1.41372	0.00126347	UDP-N-acetylmuramate-alanine ligase MurC"
MMARE11_19220	3.00984	1.58969	0.00126936	conserved protein"
MMARE11_13690	0.259275	-1.94745	0.00127506	PPE family protein"
MMARE11_29510	2.00973	1.007	0.0012858	polyprenol-monophosphomannose synthase, Ppm1B"
MMARE11_34200	0.374666	-1.41632	0.00128792	Geranylgeranyl pyrophosphate synthase"
MMARE11_08650	0.394053	-1.34354	0.00129151	glycerol-3-phosphate dehydrogenase, GpdA1"
MMARE11_51710	2.6835	1.42412	0.00129453	conserved hypothetical protein"
MMARE11_31480	2.15382	1.1069	0.00131253	carbohydrate kinase CbhK"
MMARE11_44350	0.182874	-2.45108	0.001315	PE family protein"
MMARE11_05010	0.397094	-1.33245	0.00131795	PE family protein, PE5"
MMARE11_04360	0.32289	-1.63089	0.00135814	glycosyltransferase"
MMARE11_27000	5.27205	2.39836	0.00137809	conserved hypothetical membrane protein"
MMARE11_52360	0.45088	-1.14918	0.00138513	NADH-dependent glutamate synthase (small
MMARE11_39360	3.42377	1.77559	0.00139747	conserved hypothetical transport protein"
MMARE11_37830	3.86205	1.94937	0.00140398	cytochrome P450 138A4 Cyp138A4"
MMARE11_50920	0.465803	-1.10221	0.00141198	long-chain-fatty-acid-CoA ligase FadD15_1"
MMARE11_49030	0.494698	-1.01538	0.00142232	carbonic anhydrase"
MMARE11_12610	1.60808	0.685343	0.00142829	adenosylhomocysteinase SahH"
MMARE11_36850	0.538452	-0.89311	0.00143115	pyruvate:ferredoxin oxidoreductase PorB, beta
MMARE11_18700	4.54587	2.18456	0.00143826	PPE family protein, PPE44"
MMARE11_09870	0.412325	-1.27814	0.0014384	50S ribosomal protein L4, RplD"
MMARE11_50440	2.80781	1.48944	0.00144162	aspartate-semialdehyde dehydrogenase Asd"
MMARE11_50430	4.38246	2.13174	0.00144267	conserved hypothetical secreted protein"
MMARE11_32940	0.171938	-2.54004	0.00144508	conserved hypothetical membrane protein"
MMARE11_16080	51.8139	5.69527	0.00144602	conserved hypothetical membrane protein"
MMARE11_04750	3.50853	1.81087	0.00144706	conserved hypothetical protein"
MMARE11_28250	3.56687	1.83466	0.00145381	conserved hypothetical O-methyltransferase"
MMARE11_31070	2.86175	1.5169	0.00147603	conserved protein"
MMARE11_47260	0.384416	-1.37926	0.00147634	adenylosuccinate lyase, PurB"
MMARE11_48250	3.18764	1.67249	0.00148024	conserved hypothetical oxidoreductase"
MMARE11_11390	0.214647	-2.21996	0.00153011	oxidoreductase"
MMARE11_48260	6.74928	2.75473	0.00154522	conserved hypothetical protein"
MMARE11_31340	2.78393	1.47712	0.00157089	conserved hypothetical secreted protein"
MMARE11_35350	2.72348	1.44545	0.00158506	conserved transmembrane ATP-binding protein ABC
MMARE11_31650	0.297969	-1.74677	0.00159026	ATP-binding protein ABC transporter"
MMARE11_49950	1.90477	0.929614	0.00162234	bifunctional membrane-associated
MMARE11_20270	0.198278	-2.3344	0.00162766	conserved hypothetical protein"
MMARE11_49420	0.0829978	-3.59078	0.00163554	EsaT-6 like protein EsxP_1"
MMARE11_01290	3.13432	1.64815	0.00163684	lipid-transfer protein Ltp1_1"
MMARE11_18200	0.446401	-1.16359	0.00164533	N utilization substance protein a NusA"
MMARE11_42110	0.275366	-1.86058	0.0016566	lipase LipU"
MMARE11_24360	3.88451	1.95773	0.00166192	myo-inositol-1-phosphate synthase"
MMARE11_18430	2.84795	1.50992	0.0016854	conserved hypothetical protein"
MMARE11_52730	2.65323	1.40775	0.00168851	PE family protein"
MMARE11_48110	3.71244	1.89237	0.00169572	fatty-acid-CoA ligase FadD19_1"
MMARE11_13830	0.32402	-1.62584	0.00173102	NADH dehydrogenase I (chain a) NuoA
MMARE11_36880	1.41663	0.502459	0.00173397	ATP-dependent CLP protease ATP-binding subunit
MMARE11_04740	10.5582	3.40029	0.00173828	nitrite reductase [NAD(P)H] small subunit NirD"
MMARE11_11250	0.604626	-0.725885	0.00175218	conserved hypothetical regultory protein"
MMARE11_25100	0.224976	-2.15216	0.00176382	PPE family protein, PPE8"
MMARE11_19350	1.66142	0.732417	0.00177363	RNA polymerase sigma factor SigA"
MMARE11_17750	9.0306	3.17482	0.00178435	PPE family protein"
MMARE11_21800	2.95849	1.56486	0.00178846	transcriptional activator protein"
MMARE11_23200	3.14219	1.65177	0.00178965	imidazole glycerol-phosphate dehydratase HisB"
MMARE11_26550	2.52803	1.33801	0.00180221	conserved hypothetical protein"
MMARE11_22880	0.234237	-2.09396	0.00183	fatty acyl-CoA reductase"
MMARE11_32600	3.9091	1.96684	0.00186843	conserved transmembrane protein, MmpS5_2"
MMARE11_23970	1.81058	0.856449	0.00187036	chalcone synthase, Pks11_1"
MMARE11_15410	3.88632	1.95841	0.00187809	conserved hypothetical protein"
MMARE11_08530	8.64229	3.11141	0.00187952	mannosyltransferase, PimB"
MMARE11_06850	0.469178	-1.09179	0.00189241	thiamine biosynthesis protein ThiC"
MMARE11_01410	0.412987	-1.27583	0.00189742	coenzyme F420-dependent oxidoreductase"
MMARE11_23030	0.400104	-1.32155	0.00192312	inv protein"
MMARE11_10480	0.469012	-1.0923	0.00194579	50S ribosomal protein L17, RplQ"
MMARE11_41330	0.0492878	-4.34263	0.0019464	hypothetical protein"
MMARE11_47030	7.0517	2.81797	0.00194796	hypothetical protein"
MMARE11_37120	0.628543	-0.669916	0.00195194	NAD-dependent glutamate dehydrogenase Gdh"
MMARE11_52720	0.506888	-0.980261	0.00198008	conserved hypothetical protein"
MMARE11_38940	4.38572	2.13281	0.00198657	cobalamin adenosyltransferase"
MMARE11_52020	2.22168	1.15165	0.00201023	conserved hypothetical protein"
MMARE11_39550	0.401008	-1.3183	0.0020154	lipoprotein LprC"
MMARE11_07310	0.158946	-2.65339	0.00202614	conserved hypothetical protein"
MMARE11_41620	3.26123	1.70542	0.00203217	conserved protein"
MMARE11_52180	3.70383	1.88902	0.0020509	superoxide dismutase [fe] SodA"
MMARE11_36180	0.197755	-2.33822	0.00206666	3'-phosphoadenosine 5'-phosphosulfate reductase
MMARE11_24230	0.147769	-2.75858	0.00207328	lipoprotein, LprJ"
MMARE11_37010	0.53337	-0.906792	0.00207998	conserved protein"
MMARE11_17970	2.2645	1.1792	0.00208016	nickel/iron-hydrogenase I large subunit, HyaB"
MMARE11_46510	0.273952	-1.868	0.00208876	conserved hypothetical protein"
MMARE11_13750	0.287207	-1.79984	0.00209753	NADH dehydrogenase I (chain I) NuoI
MMARE11_18500	2.16914	1.11712	0.00212101	30S ribosomal protein S15 RpsO"
MMARE11p_00880	10.9284	3.45001	0.0021515	hypothetical protein"
MMARE11_03300	0.414395	-1.27092	0.00215748	short-chain type dehydrogenase/reductase"
MMARE11_10900	2.5694	1.36143	0.00216968	metal-dependent hydrolase"
MMARE11_53100	0.347734	-1.52394	0.00219015	chromosome partitioning protein ParB"
MMARE11_20110	0.227689	-2.13486	0.00219674	conserved hypothetical protein"
MMARE11_30840	0.45681	-1.13033	0.00221991	conserved hypothetical membrane protein"
MMARE11_49830	0.422563	-1.24276	0.00222817	membrane-associated serine protease"
MMARE11_27330	20.7312	4.37373	0.00224657	transcriptional regulatory protein
MMARE11_29390	0.0717815	-3.80024	0.00226575	conserved hypothetical membrane protein"
MMARE11_44990	2.61124	1.38474	0.00226803	conserved protein"
MMARE11_51940	2.65578	1.40913	0.0022755	UDP-galactopyranose mutase Glf"
MMARE11_43430	2.61588	1.3873	0.00229118	mycobacterial persistence regulator MprA"
MMARE11_16870	0.617644	-0.695152	0.00231806	multifunctional mycocerosic acid synthase
MMARE11_46340	0.113109	-3.14421	0.00231887	hypothetical membrane protein"
MMARE11_26750	1.51453	0.598869	0.00234239	alkyl hydroperoxide reductase D protein AhpD"
MMARE11_47990	0.354113	-1.49772	0.00237698	conserved membrane protein YrbE4A"
MMARE11_25850	0.580063	-0.785719	0.00240964	conserved FtsK/SpoIIIE family protein"
MMARE11_46770	0.183055	-2.44965	0.00242033	sulphur metabolism protein, SseC2"
MMARE11_04690	2.35212	1.23396	0.00243151	succinate dehydrogenase (membrane anchor
MMARE11_26920	0.249172	-2.00479	0.0024488	conserved hypothetical protein"
MMARE11_25790	4.14778	2.05234	0.00245464	conserved hypothetical protein"
MMARE11_49490	0.440883	-1.18153	0.00245597	D-alanyl-D-alanine carboxypeptidase DacB1"
MMARE11_47310	0.362126	-1.46544	0.00247578	molybdopterin biosynthesis protein, MoeY"
MMARE11_21990	2.95837	1.5648	0.00248666	thioredoxin TrxB1"
MMARE11_37370	0.304942	-1.71339	0.00248972	succinyl-CoA:3-ketoacid-coenzyme A transferase
MMARE11_30600	7.03181	2.8139	0.00249132	hypothetical protein"
MMARE11_05040	0.507361	-0.978915	0.00252633	EsaT-6 like protein EsxH"
MMARE11_32460	3.59128	1.8445	0.00252675	conserved hypothetical protein"
MMARE11_13790	0.230275	-2.11857	0.00253493	NADH dehydrogenase I (chain E) NuoE
MMARE11_14650	3.86817	1.95165	0.00253697	conserved hypothetical secreted protein"
MMARE11_30010	2.14802	1.103	0.00253703	sec-independent protein translocase
MMARE11_30070	0.528633	-0.919663	0.00253962	proteasome (beta subunit) PrcB"
MMARE11_18220	0.489621	-1.03026	0.00254427	translation initiation factor IF-2 InfB"
MMARE11_20930	0.216407	-2.20818	0.00256241	conserved hypothetical protein"
MMARE11_04990	2.18815	1.12971	0.00256362	conserved membrane protein"
MMARE11_09940	0.421728	-1.24562	0.00259282	50S ribosomal protein L29, RpmC"
MMARE11_31640	0.284844	-1.81176	0.00261788	integral membrane protein ABC transporter"
MMARE11_39090	1.8766	0.908118	0.00261815	50S ribosomal protein L31 RpmE"
MMARE11_02000	0.339906	-1.55679	0.00262682	glutamine-transport ATP-binding protein ABC
MMARE11_28810	6.80459	2.76651	0.00263854	hypothetical protein"
MMARE11_04770	9.41432	3.23486	0.00263899	transcriptional regulatory protein"
MMARE11_03050	5.56551	2.47651	0.00264396	flavodoxin oxidoreductase"
MMARE11_07260	5.40295	2.43375	0.00266381	conserved hypothetical protein"
MMARE11_41340	0.15935	-2.64973	0.00266614	PPE family protein"
MMARE11_25390	0.294556	-1.76339	0.00266629	putative signal-transduction protein containing
MMARE11_30080	0.474668	-1.07501	0.00267228	conserved protein"
MMARE11_48270	5.93242	2.56862	0.00270507	conserved hypothetical protein"
MMARE11_00870	4.6328	2.21189	0.00271775	polyketide synthase"
MMARE11_10930	0.454016	-1.13918	0.00271926	alternative RNA polymerase sigma-D factor, SigD"
MMARE11_37360	0.182334	-2.45535	0.00274203	succinyl-CoA:3-ketoacid-coenzyme A transferase
MMARE11_19670	2.50837	1.32675	0.00275461	conserved transmembrane protein"
MMARE11_23510	2.52836	1.3382	0.00276351	'tRNA-Leu(caa)'"
MMARE11_51720	4.04532	2.01625	0.00278269	conserved hypothetical membrane protein"
MMARE11_22590	0.155022	-2.68945	0.00278916	conserved hypothetical membrane protein"
MMARE11_22510	0.320173	-1.64308	0.00281614	3-dehydroquinate synthase AroB_2"
MMARE11_23390	0.546924	-0.870587	0.00281821	prolipoprotein diacylglyceryl transferases Lgt"
MMARE11_15550	3.21618	1.68535	0.00282633	cytochrome P450 136A2 Cyp136A2"
MMARE11_39800	2.44106	1.28751	0.00283324	conserved transmembrane ATP-binding protein ABC
MMARE11_41920	0.483862	-1.04733	0.00284226	PhoH-like protein PhoH2"
MMARE11_40120	3.73445	1.90089	0.00286429	F420-dependent glucose-6-phosphate dehydrogenase
MMARE11_28710	6.83686	2.77333	0.00288823	hypothetical protein"
MMARE11_21610	0.456054	-1.13272	0.00289322	glyceraldehyde 3-phosphate dehydrogenase Gap"
MMARE11_19280	3.18959	1.67337	0.00289691	conserved hypothetical membrane protein"
MMARE11_18560	2.6357	1.39819	0.00291973	secreted L-alanine dehydrogenase Ald (40 kDa
MMARE11_48450	4.15143	2.05361	0.0029227	conserved hypothetical protein"
MMARE11_20150	0.531869	-0.910857	0.00292873	conserved hypothetical protein"
MMARE11_46660	1.896	0.92296	0.00295574	conserved hypothetical protein"
MMARE11_35640	0.212772	-2.23262	0.00296577	membrane-associated phospholipase C 2 PlcB_5"
MMARE11_51730	2.22216	1.15196	0.00296848	oxidoreductase"
MMARE11_52680	1.76271	0.817796	0.00297523	conserved hypothetical protein"
MMARE11_07210	2.06231	1.04426	0.00301441	conserved transmembrane transport protein
MMARE11_30620	5.49841	2.45901	0.00301541	hypothetical protein"
MMARE11_30940	0.558388	-0.840661	0.00304852	FtsW-like protein FtsW"
MMARE11_52750	0.642545	-0.63813	0.00304996	Esat-6 like protein EsxB"
MMARE11_49190	2.32797	1.21907	0.00307664	conserved membrane protein"
MMARE11_26970	5.92958	2.56793	0.00308319	conserved hypothetical protein"
MMARE11_47980	0.3741	-1.4185	0.00308551	conserved hypothetical membrane protein YrbE4B"
MMARE11_36870	1.96806	0.976772	0.00311456	conserved integral membrane transport protein"
MMARE11_19950	14.0354	3.81099	0.00312277	tRNA-Val"
MMARE11_21590	0.400148	-1.32139	0.00318361	dehydrogenase"
MMARE11_35220	0.403522	-1.30928	0.00324858	conserved membrane protein"
MMARE11_37150	0.192553	-2.37667	0.00333776	hypothetical protein"
MMARE11_24250	0.283373	-1.81922	0.00333907	phosphatase"
MMARE11_45800	3.50092	1.80774	0.00335983	transcriptional regulatory protein"
MMARE11_17190	0.414303	-1.27124	0.00336818	signal recognition particle protein Ffh"
MMARE11_49610	0.262868	-1.92759	0.00338865	conserved hypothetical protein"
MMARE11_37310	0.142099	-2.81503	0.00341211	citrate (pro-3s)-lyase (beta subunit) CitE"
MMARE11_18850	4.81055	2.2662	0.00344009	thymidylate synthase ThyX"
MMARE11_24310	0.265743	-1.91189	0.00344258	conserved hypothetical protein"
MMARE11_15920	0.426978	-1.22777	0.00344336	DNA photolyase, PhrI"
MMARE11_10660	0.528532	-0.919938	0.00344649	phosphomannomutase, MrsA"
MMARE11_32610	2.50849	1.32682	0.00346699	cytochrome P450 124A1, Cyp124A1"
MMARE11_10200	3.4608	1.79111	0.00350206	transcriptional regulatory protein"
MMARE11_23710	0.455395	-1.13481	0.00352038	initiation factor IF-3 InfC"
MMARE11_04870	0.565106	-0.823408	0.00357905	acyl-CoA dehydrogenase FadE6"
MMARE11_35860	2.09298	1.06556	0.00359242	PhoH-like protein PhoH1"
MMARE11_46980	3.3148	1.72892	0.00359375	conserved hypothetical protein"
MMARE11_05030	0.511404	-0.967466	0.00360392	EsaT-6 like protein EsxG"
MMARE11_08890	4.621	2.2082	0.00361595	oxidoreductase"
MMARE11_02820	0.455774	-1.13361	0.00362129	transmembrane acyltransferase"
MMARE11_50570	0.474834	-1.07451	0.00362182	conserved protein"
MMARE11_15930	0.334241	-1.58104	0.00362984	tryptophan-rich sensory protein"
MMARE11_19590	0.417363	-1.26062	0.00366927	conserved hypothetical protein"
MMARE11_22740	0.150125	-2.73576	0.00379229	conserved hypothetical transmembrane protein"
MMARE11_19150	0.508066	-0.976912	0.00383417	conserved transmembrane alanine and glycine rich
MMARE11_30950	0.334336	-1.58063	0.00385912	UDP-N-acetylmuramoylalanine-D-glutamate ligase
MMARE11_16750	0.611376	-0.709869	0.00391184	conserved hypothetical protein"
MMARE11_30020	2.16147	1.11201	0.00391664	sec-independent protein translocase
MMARE11_40940	0.509658	-0.972397	0.00393719	F420 biosynthesis protein FbiC"
MMARE11_49980	3.67386	1.8773	0.00401925	conserved hypothetical protein"
MMARE11_31500	2.0198	1.01421	0.00402952	conserved protein"
MMARE11_46410	0.405032	-1.30389	0.00405073	marR-family transcriptional regulator"
MMARE11_36200	0.390448	-1.3568	0.00405744	gamma-glutamyltranspeptidase precursor GgtB"
MMARE11_13730	0.220324	-2.1823	0.00406667	NADH dehydrogenase I (chain K) NuoK
MMARE11_26330	0.509027	-0.974186	0.00410234	conserved membrane protein"
MMARE11_05530	1.98648	0.990211	0.00411264	'tRNA-Gly(ccc)'"
MMARE11_53080	2.60766	1.38276	0.00413755	hydrolase"
MMARE11_17530	0.492187	-1.02272	0.00414507	uridylate kinase PyrH"
MMARE11_19710	4.58758	2.19773	0.00415918	conserved hypothetical protein"
MMARE11_37340	0.200781	-2.31631	0.00418907	acetyl-/propionyl-coenzyme A carboxylase alpha
MMARE11_28280	3.20644	1.68097	0.00425081	hypothetical protein"
MMARE11_51020	4.98802	2.31847	0.00430518	conserved hypothetical protein"
MMARE11_15730	0.536017	-0.89965	0.00431112	phosphoserine phosphatase SerB2"
MMARE11_50340	0.29749	-1.74909	0.00433367	selenocysteine lyase, CsdB"
MMARE11_21730	0.405375	-1.30267	0.00433611	OXPP cycle protein OpcA"
MMARE11_43060	2.95106	1.56123	0.00433918	arginine deiminase ArcA"
MMARE11_26240	0.513554	-0.961412	0.00434832	glycine cleavage system H protein GcvH"
MMARE11_47120	4.06324	2.02263	0.00434931	conserved hypothetical regulatory protein"
MMARE11_20370	0.557085	-0.844031	0.00435246	pyridoxine biosynthesis protein, SnzP"
MMARE11_12520	0.370832	-1.43116	0.0043757	conserved hypothetical protein"
MMARE11_19200	2.65379	1.40806	0.00439784	conserved hypothetical protein"
MMARE11_01300	4.69962	2.23254	0.00442581	conserved hypothetical protein"
MMARE11_36670	3.92457	1.97253	0.00443648	Sir2-like regulatory protein"
MMARE11_10240	0.590627	-0.759681	0.00445177	conserved protein"
MMARE11_11380	0.296304	-1.75485	0.00446485	conserved secreted protein"
MMARE11_06770	0.423556	-1.23937	0.00447248	lipoprotein peptidase LpqM"
MMARE11_29060	9.42734	3.23685	0.00448972	IS2 transposase TnpB"
MMARE11_25780	4.73911	2.24461	0.00450512	isochorismatase family protein"
MMARE11_50010	18.8725	4.23822	0.00450695	conserved hypothetical membrane protein"
MMARE11_31470	1.90878	0.932653	0.00451251	asparagine synthetase AsnB"
MMARE11_26960	9.68465	3.2757	0.0045505	oxidoreductase"
MMARE11_50870	0.286319	-1.8043	0.00457277	conserved hypothetical protein"
MMARE11_47220	2.86146	1.51675	0.00461991	aldehyde dehydrogenase"
MMARE11_19630	0.297067	-1.75114	0.00467453	protoporphyrinogen oxidase HemY"
MMARE11_40680	6.49445	2.69921	0.0046895	conserved hypothetical protein"
MMARE11_51950	0.564328	-0.825395	0.00471214	exported repetitive protein precursor Erp"
MMARE11_03310	0.182814	-2.45155	0.00473142	quinone oxidoreductase"
MMARE11_42350	0.611153	-0.710395	0.00474234	arylsulfatase, AslA"
MMARE11_01390	1.84416	0.882962	0.00477268	conserved protein"
MMARE11_44590	2.37877	1.25022	0.0047933	two-component sensor histidine kinase PrrB"
MMARE11_04180	3.37972	1.7569	0.00479391	conserved hypothetical membrane protein"
MMARE11_26190	0.528558	-0.919865	0.00479761	preprotein translocase ATPase SecA2"
MMARE11_48020	3.01771	1.59345	0.00480914	acyl-CoA dehydrogenase FadE26"
MMARE11_36630	0.421372	-1.24684	0.0048222	conserved hypothetical membrane protein"
MMARE11_19780	4.93192	2.30215	0.00482432	site-specific tyrosine recombinase XerC"
MMARE11_37720	4.23371	2.08192	0.00483711	NAD-dependent aldehyde dehydrogenase"
MMARE11_48830	3.83196	1.93808	0.00483716	acyl-CoA dehydrogenase FadE34"
MMARE11_52840	0.478966	-1.062	0.00484733	conserved hypothetical membrane protein"
MMARE11_46310	0.316589	-1.65932	0.00485212	hypothetical membrane protein"
MMARE11_19800	5.2024	2.37918	0.0048557	hypothetical protein"
MMARE11_48530	1.96997	0.978176	0.00485768	electron transfer protein FdxB"
MMARE11_25970	1.46709	0.552961	0.00487006	conserved membrane protein"
MMARE11_05760	0.435597	-1.19893	0.00487692	conserved protein"
MMARE11_00720	0.33903	-1.56051	0.00487739	single-strand binding protein Ssb"
MMARE11_34520	3.65927	1.87155	0.00492927	conserved hypothetical protein"
MMARE11_18770	0.216627	-2.20672	0.0049377	acyl-CoA dehydrogenase FadE34_1"
MMARE11_03260	2.51515	1.33064	0.00497126	conserved hypothetical protein"
MMARE11_47150	4.31922	2.11077	0.00497555	integral membrane drug efflux protein"
MMARE11_17310	0.562756	-0.829418	0.00499191	50S ribosomal protein L19 RplS"
MMARE11_23420	1.82549	0.86828	0.00500087	cutinase Cut1"
MMARE11_41540	2.1247	1.08726	0.00504256	transcriptional regulatory protein (probably
MMARE11_49020	0.556818	-0.844723	0.00505912	conserved membrane protein"
MMARE11_02510	3.06477	1.61578	0.0050721	conserved secreted protein"
MMARE11_08130	2.89227	1.5322	0.00509137	GabA permease (gamma-aminobutyrate permease)
MMARE11_22610	0.402883	-1.31157	0.00510641	SAM-dependent methyltransferase"
MMARE11_12230	0.393236	-1.34653	0.00512344	conserved protein"
MMARE11_33580	2.79774	1.48426	0.00514156	conserved hypothetical protein"
MMARE11_01540	12.1887	3.60747	0.00515253	glutamate decarboxylase"
MMARE11_08880	2.80294	1.48694	0.0051599	cytochrome P450 135B4 Cyp135B4"
MMARE11_02630	16.4272	4.03802	0.00520371	conserved protein"
MMARE11_08390	3.1067	1.63538	0.00520534	conserved protein"
MMARE11_20200	0.368902	-1.43869	0.00520838	conserved hypothetical protein"
MMARE11_39440	2.36291	1.24056	0.00523603	conserved hypothetical protein"
MMARE11_17210	2.67362	1.4188	0.00523708	transmembrane serine/threonine-protein kinase I
MMARE11_39060	0.161821	-2.62753	0.00525992	conserved hypothetical protein"
MMARE11_40970	2.66199	1.4125	0.00527929	hypothetical protein"
MMARE11_17030	0.464496	-1.10626	0.00529439	ribonuclease III Rnc"
MMARE11_28290	2.15011	1.10441	0.00531441	cutinase precursor"
MMARE11_18860	1.88741	0.916408	0.00533356	dihydrodipicolinate synthase DapA"
MMARE11_34330	5.91753	2.56499	0.00534476	transmembrane alkane 1-monooxygenase AlkB_1"
MMARE11_19680	2.57696	1.36567	0.00536443	conserved hypothetical membrane protein"
MMARE11_28820	7.14278	2.83648	0.00542155	PemK-like protein"
MMARE11_34380	0.557492	-0.842976	0.00545043	chaperone protein HtpG"
MMARE11_08400	3.03478	1.60159	0.00545485	conserved hypothetical membrane protein"
MMARE11_48870	19.6273	4.29479	0.00554137	ATPase component of an ABC-type transport
MMARE11_32380	1.35683	0.440243	0.0055431	meromycolate extension acyl carrier protein
MMARE11_16720	3.65561	1.87011	0.00554432	formyltetrahydrofolate deformylase PurU"
MMARE11_31040	1.44806	0.534124	0.00556344	conserved hypothetical membrane protein"
MMARE11_21410	0.651126	-0.618992	0.00557912	aminoglycosides/tetracycline-transport integral
MMARE11_17020	0.560258	-0.835836	0.00559995	conserved hypothetical protein"
MMARE11_36350	0.217121	-2.20343	0.00563676	PE-PGRS family protein, PE_PGRS2"
MMARE11_01520	35.386	5.14511	0.00565744	conserved hypothetical transmembrane protein"
MMARE11_09200	0.498235	-1.0051	0.00568213	preprotein translocase (tail-anchored membrane
MMARE11_13130	1.73924	0.798458	0.00568399	ATP-dependent RNA helicase RhlE"
MMARE11_21670	3.24364	1.69761	0.00568801	conserved hypothetical membrane protein"
MMARE11_22600	0.121964	-3.03547	0.00571938	hypothetical transmembrane protein"
MMARE11_32410	0.659568	-0.600408	0.00573576	acetyl/propionyl-CoA carboxylase (beta subunit)
MMARE11_35570	3.38943	1.76104	0.00573972	conserved hypothetical protein"
MMARE11_09960	3.40292	1.76677	0.00575447	transcriptional regulator BetI"
MMARE11_46590	8.29415	3.05209	0.0057694	deaminase"
MMARE11_21100	0.134003	-2.89966	0.00576967	conserved lipoprotein LprF"
MMARE11p_00650	0.128978	-2.95481	0.00577939	WXG100 family type VII secretion target"
MMARE11_03820	0.336525	-1.57121	0.00585663	conserved Mce associated transmembrane protein"
MMARE11_43910	2.24575	1.1672	0.00586446	phosphate-transport integral membrane ABC
MMARE11_07600	0.599009	-0.739351	0.00587559	transcriptional regulatory protein"
MMARE11_50580	1.89699	0.923711	0.00589326	conserved hypothetical dehydrogenase"
MMARE11_07360	0.409142	-1.28933	0.0058982	conserved hypothetical protein"
MMARE11_02580	6.64297	2.73183	0.00591026	conserved hypothetical protein"
MMARE11_44460	0.411223	-1.28201	0.00591677	metal cation transporter ATPase p-type CtpE"
MMARE11_27660	3.59029	1.8441	0.00596934	alpha-L-fucosidase"
MMARE11_33500	2.3488	1.23193	0.00598684	PPE family protein, PPE61_1"
MMARE11_33510	2.3488	1.23193	0.00601108	PPE family protein, PPE61"
MMARE11_03430	2.4403	1.28706	0.00603337	conserved hypothetical protein"
MMARE11_15320	3.70142	1.88808	0.00603425	FAD dependent oxidoreductase"
MMARE11_39030	1.99659	0.997537	0.00605359	ATP synthase a chain AtpB"
MMARE11_38840	0.598357	-0.740921	0.0060984	acetyl-CoA acetyltransferase FadA4"
MMARE11_20520	0.320266	-1.64266	0.00614643	Holliday junction DNA helicase RuvB"
MMARE11_24760	0.108604	-3.20285	0.00616974	putative glycosyl transferase"
MMARE11_00730	0.356062	-1.4898	0.00621337	30S ribosomal protein S18-1 RpsR1"
MMARE11_00830	5.23718	2.38879	0.0062589	conserved transmembrane transport protein,
MMARE11p_00040	3.38264	1.75815	0.00625943	hypothetical protein"
MMARE11_22370	0.19906	-2.32873	0.00630825	conserved hypothetical methyltransferase"
MMARE11_04170	4.64436	2.21548	0.00631717	enoyl-CoA hydratase, EchA8_4"
MMARE11_19070	0.211033	-2.24446	0.00637335	conserved hypothetical membrane protein"
MMARE11_04560	0.313599	-1.67301	0.00637972	conserved lipoprotein LpqI"
MMARE11_51840	0.63426	-0.656854	0.00638852	propionyl-CoA carboxylase beta chain 4 AccD4_1"
MMARE11_25320	0.682594	-0.5509	0.00642942	conserved transmembrane ATP-binding protein ABC
MMARE11_43750	0.269754	-1.89028	0.00644727	PE-PGRS family protein"
MMARE11_27030	2.35403	1.23513	0.00644807	cytochrome P450 125A6 Cyp125A6"
MMARE11_02470	2.22638	1.1547	0.00646422	cation transporter p-type ATPase a CtpA"
MMARE11_05060	0.428373	-1.22306	0.0064736	conserved transmembrane protein"
MMARE11_01280	3.94827	1.98122	0.00651097	transcriptional regulatory protein (probably
MMARE11_21120	0.195348	-2.35588	0.00653715	chalcone/stilbene synthase"
MMARE11_02620	34.68	5.11603	0.00654134	50S ribosomal protein L28 RpmB2"
MMARE11_48820	5.40493	2.43428	0.00658548	conserved hypothetical secreted protein"
MMARE11_44010	2.11857	1.08309	0.00659652	hypothetical protein"
MMARE11_28660	3.06095	1.61398	0.00662583	1-aminocyclopropane-1-carboxylate deaminase"
MMARE11_05630	0.396156	-1.33586	0.00662713	conserved hypothetical protein"
MMARE11_43940	8.70699	3.12217	0.0066523	conserved hypothetical protein"
MMARE11p_00680	0.161263	-2.63251	0.00665655	type VII secretion integral membrane protein
MMARE11_16020	0.434095	-1.20392	0.00666097	transferase"
MMARE11_28120	2.51246	1.3291	0.00667317	conserved hypothetical protein"
MMARE11_22940	2.68838	1.42674	0.00667981	hypothetical protein"
MMARE11_35750	0.419458	-1.2534	0.00671118	glycyl-tRNA synthetase GlyS"
MMARE11_15780	24.2616	4.60061	0.00675298	hydrogenase HycP"
MMARE11_14350	0.299204	-1.7408	0.00680181	conserved hypothetical protein"
MMARE11_12020	4.59281	2.19938	0.00681051	periplasmic phosphate-binding lipoprotein
MMARE11_09980	2.2525	1.17153	0.00681852	arylsulfatase AtsA"
MMARE11_40890	2.06703	1.04756	0.00685636	ferredoxin FdxC"
MMARE11_24370	10.2925	3.36352	0.00693716	transferase"
MMARE11_03060	5.00878	2.32446	0.00694274	linoleoyl-CoA desaturase, DesA3_2"
MMARE11_23640	1.98509	0.989206	0.00695707	conserved protein"
MMARE11_16160	3.28472	1.71577	0.00700499	regulatory protein"
MMARE11_41220	0.3646	-1.45561	0.00704557	alpha-methylacyl-CoA racemase Mcr"
MMARE11_30140	5.36121	2.42256	0.00704995	conserved lipoprotein, LppK"
MMARE11_51900	0.337173	-1.56844	0.00705139	conserved transmembrane protein"
MMARE11_22020	3.34269	1.74101	0.00710699	transcriptional regulatory protein"
MMARE11_06200	2.0121	1.00871	0.00715886	Mg2+ transport transmembrane protein MgtE"
MMARE11_44220	4.1214	2.04313	0.0072695	site-specific tyrosine recombinase XerC"
MMARE11_44430	0.381478	-1.39033	0.00726953	conserved protein"
MMARE11_26060	3.39909	1.76515	0.00727737	conserved hypothetical membrane protein"
MMARE11_22750	0.330254	-1.59835	0.0072862	UDP-glycosyltransferase"
MMARE11_33640	2.82202	1.49673	0.00729987	conserved hypothetical regulatory protein"
MMARE11_28360	4.33024	2.11445	0.00731751	ferric uptake regulation protein FurA"
MMARE11_33310	0.396513	-1.33456	0.00742903	conserved hypothetical transcriptional
MMARE11_41870	0.500115	-0.999667	0.00747704	fructose 1,6-bisphosphatase GlpX"
MMARE11_13490	0.343492	-1.54165	0.00750214	conserved hypothetical protein"
MMARE11_49720	3.4605	1.79098	0.00750499	phosphoserine phosphatase SerB"
MMARE11_27070	2.13069	1.09132	0.00751475	conserved hypothetical protein"
MMARE11_10440	0.576767	-0.79394	0.00752151	30S ribosomal protein S13, RpsM"
MMARE11_23800	0.579099	-0.788118	0.00755602	phenylalanyl-tRNA synthetase, beta chain PheT"
MMARE11_36220	0.369388	-1.43679	0.00757417	sulfate-transport ATP-binding protein ABC
MMARE11_49960	2.07369	1.0522	0.0076307	conserved membrane protein"
MMARE11_28740	0.422973	-1.24136	0.00763667	conserved hypothetical protein"
MMARE11_17320	0.581693	-0.781671	0.00763874	signal peptidase I LepB"
MMARE11_21510	0.462188	-1.11345	0.00764959	conserved membrane protein"
MMARE11_47910	0.269124	-1.89366	0.00765775	conserved hypothetical alanine and valine rich
MMARE11_12390	0.332095	-1.59033	0.00768587	conserved hypothetical protein"
MMARE11_42040	2.35361	1.23487	0.00774861	conserved protein"
MMARE11_20800	0.449484	-1.15366	0.00779998	aspartyl-tRNA synthetase AspS"
MMARE11_10940	0.534808	-0.902906	0.00781878	conserved hypothetical protein"
MMARE11_24240	0.403744	-1.30849	0.00782594	conserved protein"
MMARE11_14680	2.73513	1.45161	0.00787455	transcriptional regulatory protein"
MMARE11_31010	0.524576	-0.930776	0.00787486	conserved proline rich membrane protein"
MMARE11_16610	0.394822	-1.34073	0.00789298	ATP-dependent DNA helicase RecG"
MMARE11_30750	0.491197	-1.02562	0.0080301	conserved transmembrane transport protein
MMARE11_31060	2.70861	1.43755	0.008096	conserved lipoprotein LppM"
MMARE11_22160	0.578989	-0.788393	0.00811976	conserved hypothetical secreted protein"
MMARE11_10050	0.521444	-0.939416	0.00813911	30S ribosomal protein S14, RpsN"
MMARE11_22920	0.588834	-0.764068	0.00814024	fatty-acid-CoA ligase, FadD11"
MMARE11_19050	1.58254	0.662238	0.00816914	conserved protein"
MMARE11_39150	1.80476	0.851805	0.00817043	'tRNA-Arg(ccg)'"
MMARE11_41820	5.64202	2.49621	0.00824967	PE-PGRS family protein"
MMARE11_41070	0.254198	-1.97597	0.00831124	conserved hypothetical secreted protein"
MMARE11_31450	0.51895	-0.946331	0.00836582	conserved integral membrane protein"
MMARE11_30130	0.58599	-0.771053	0.0083747	ATPase"
MMARE11_47950	0.471016	-1.08615	0.00837558	MCE-family protein Mce4C"
MMARE11_15370	5.37548	2.42639	0.00839844	hypothetical protein"
MMARE11_25810	2.28136	1.1899	0.00842911	conserved hypothetical protein"
MMARE11_15740	8.51749	3.09043	0.00851381	transcriptional regulatory protein"
MMARE11_41470	2.45453	1.29545	0.00851469	conserved hypothetical membrane protein"
MMARE11_06210	2.96546	1.56826	0.00864135	conserved membrane protein"
MMARE11_19140	2.88301	1.52757	0.00868917	conserved hypothetical integral membrane
MMARE11_37090	0.196687	-2.34602	0.00872155	molybdopterin biosynthesis protein MoeY_1"
MMARE11_41550	3.34758	1.74312	0.00884709	conserved hypothetical protein"
MMARE11_29070	3.83748	1.94016	0.00886031	transcriptional regulatory protein
MMARE11_12270	1.68563	0.753285	0.00888348	conserved hypothetical membrane protein"
MMARE11_16690	0.255858	-1.96658	0.00890706	methyltransferase"
MMARE11_36400	1.75539	0.811789	0.00892443	30S ribosomal protein S20 RpsT"
MMARE11_30910	0.43759	-1.19235	0.00897082	cell division protein FtsQ"
MMARE11_30520	0.359772	-1.47484	0.00902655	putative helicase"
MMARE11_40350	0.0905512	-3.46512	0.00907764	PE-PGRS family protein"
MMARE11_40110	2.28565	1.1926	0.00908097	magnesium and cobalt transport transmembrane
MMARE11_20070	0.376014	-1.41114	0.00911077	fatty-acid-CoA ligase"
MMARE11_33460	3.29438	1.72001	0.00911657	conserved hypothetical hydroxylase"
MMARE11_37020	0.575114	-0.798079	0.00912034	conserved hypothetical protein"
MMARE11_07580	1.43124	0.517268	0.00915411	conserved lipoprotein LprQ"
MMARE11_26930	0.444102	-1.17104	0.00915437	resuscitation-promoting factor-like protein"
MMARE11_00990	0.280081	-1.83609	0.00918822	oxidoreductase"
MMARE11_05190	0.532567	-0.908965	0.00925025	conserved hypothetical proline and threonine
MMARE11_52740	1.6612	0.732229	0.00929506	PPE family protein"
MMARE11_08620	1.90028	0.926213	0.00931245	peptidase heat shock protein X, HspX"
MMARE11_18730	0.0540319	-4.21004	0.0093173	PPE family protein, PPE15_1"
MMARE11_53120	0.255916	-1.96626	0.00935235	glucose-inhibited division protein B Gid"
MMARE11_07640	1.79243	0.841913	0.00935476	two-component sensor histidine kinase SenX3"
MMARE11_43350	0.480938	-1.05608	0.00938303	UTP--glucose-1-phosphate uridylyltransferase
MMARE11_01480	6.27473	2.64955	0.00941253	conserved hypothetical membrane protein"
MMARE11_03640	4.14511	2.05141	0.00944166	conserved hypothetical protein"
MMARE11_48290	4.54634	2.18471	0.00946117	conserved hypothetical protein"
MMARE11_13280	0.380275	-1.39489	0.00946717	NADH pyrophosphatase NudC"
MMARE11_09630	0.607557	-0.718908	0.0094787	30S ribosomal protein S12, RpsL"
MMARE11_46470	3.7853	1.92041	0.00953668	conserved hypothetical protein"
MMARE11_49330	0.391321	-1.35358	0.00954762	dihydropteroate synthase 1 FolP1"
MMARE11_05240	2.06838	1.0485	0.00956227	beta-1,3-glucanase precursor"
MMARE11_36610	0.287083	-1.80046	0.00965332	conserved hypothetical membrane protein"
MMARE11_27900	0.374966	-1.41517	0.00966055	conserved hypothetical membrane protein"
MMARE11_48070	0.490824	-1.02672	0.00966413	acetohydroxyacid synthase IlvX"
MMARE11_09190	0.678135	-0.560355	0.0096704	'tRNA-Trp(cca)'"
MMARE11_31680	0.39314	-1.34689	0.00968533	conserved transmembrane transport protein-MmpL
MMARE11_32590	0.391103	-1.35438	0.00971521	conserved hypothetical protein"
MMARE11_02380	0.634857	-0.655497	0.00979137	conserved transmembrane transport protein,
MMARE11_49280	2.18208	1.1257	0.00979731	conserved hypothetical alanine and leucine-rich
MMARE11_01510	11.7518	3.55481	0.00983557	nucleoside-diphosphate-sugar epimerase"
MMARE11_00010	1.87236	0.904857	0.00988015	Chromosomal replication initiator protein DnaA"
MMARE11_48680	5.23061	2.38698	0.00988024	acyl-CoA dehydrogenase FadE33"
MMARE11_23040	3.5898	1.8439	0.00994565	conserved hypothetical membrane protein"
MMARE11_53160	1.62637	0.701652	0.00994612	ribonuclease P protein component RnpA"
MMARE11_00650	2.14969	1.10413	0.00999091	conserved hypothetical protein"
MMARE11_00750	0.640319	-0.643137	0.0100381	replicative DNA helicase DnaB"
MMARE11_48170	5.21795	2.38348	0.010043	lipid transfer protein or keto acyl-CoA thiolase
MMARE11_00270	4.05072	2.01818	0.0100693	hypothetical protein"
MMARE11_31400	0.420967	-1.24822	0.010075	ubiquinol-cytochrome C reductase QcrC"
MMARE11_44360	0.199784	-2.32349	0.0101949	PPE family protein"
MMARE11_33090	0.109565	-3.19015	0.0102073	conserved hypothetical membrane protein"
MMARE11_28990	4.86588	2.2827	0.0102493	acyl-ACP thioesterase, FatA"
MMARE11_51370	0.151532	-2.7223	0.0104503	conserved membrane protein"
MMARE11_22230	1.71439	0.777697	0.0104865	conserved membrane protein"
MMARE11_37950	3.71121	1.89189	0.0104914	conserved metal-dependent hydrolase"
MMARE11_34600	5.83313	2.54427	0.0105588	conserved hypothetical protein"
MMARE11_08250	0.490691	-1.02711	0.0105754	cytochrome C-type biogenesis protein, CcsB"
MMARE11_07140	0.383601	-1.38232	0.0105999	conserved secreted protein"
MMARE11_49340	0.469441	-1.09099	0.0106088	GTP cyclohydrolase I FolE"
MMARE11_08950	0.298373	-1.74481	0.0106147	conserved hypothetical membrane protein"
MMARE11_23770	2.75335	1.46119	0.0106205	conserved hypothetical protein"
MMARE11_16280	3.87854	1.95551	0.0106409	conserved hypothetical protein"
MMARE11_35550	0.363676	-1.45927	0.010657	thioredoxin ThiX"
MMARE11_09170	0.736538	-0.441169	0.0106771	conserved protein"
MMARE11_14230	2.7215	1.4444	0.0106824	acyl-CoA dehydrogenase FadE24"
MMARE11_23170	3.32509	1.73339	0.0107413	conserved hypothetical protein"
MMARE11_02910	0.477785	-1.06557	0.0107846	elongation factor G FusA2"
MMARE11_27840	5.01049	2.32495	0.0107995	oxygenase"
MMARE11_23940	0.483816	-1.04747	0.0108536	polyketide synthase Pks7"
MMARE11_49870	0.520418	-0.942258	0.0108591	conserved hypothetical membrane protein"
MMARE11_21760	1.67608	0.745088	0.0108831	transketolase Tkt"
MMARE11_32420	3.01805	1.59362	0.010898	conserved hypothetical protein"
MMARE11_07100	4.31684	2.10998	0.0109419	conserved hypothetical protein"
MMARE11_01610	12.0143	3.58668	0.0109931	polyketide synthase Pks16_1"
MMARE11_05720	4.15277	2.05407	0.0110443	conserved hypothetical protein"
MMARE11_20490	0.430423	-1.21617	0.0110504	conserved protein"
MMARE11_26430	2.56249	1.35755	0.0110984	urease gamma subunit UreA"
MMARE11_50180	2.96814	1.56956	0.0111212	formate dehydrogenase, beta subunit,
MMARE11_25900	3.64766	1.86697	0.0111244	PE family protein, PE19_1"
MMARE11_01910	2.84627	1.50907	0.0111347	serine hydroxymethyltransferase GlyA2"
MMARE11_19850	6.97422	2.80203	0.0112131	hypothetical protein"
MMARE11_17470	0.56743	-0.817485	0.0112963	elongation factor Tsf"
MMARE11p_00460	2.52109	1.33405	0.011318	'ParB/RepB/Spo0J family partition protein'"
MMARE11_12300	0.468144	-1.09498	0.0115624	acyl-CoA dehydrogenase FadE25"
MMARE11_23760	1.35837	0.441881	0.011579	PE family protein"
MMARE11_22910	0.72301	-0.467913	0.011586	DNA polymerase III, alpha subunit, DnaE1"
MMARE11_11780	0.291515	-1.77836	0.0116001	chitinase"
MMARE11_51820	0.37068	-1.43175	0.011602	acyl-CoA dehydrogenase FadE35"
MMARE11_34230	2.72647	1.44704	0.0116193	conserved hypothetical membrane protein"
MMARE11_45820	0.248959	-2.00602	0.0116428	short-chain type dehydrogenase/reductase"
MMARE11_15270	3.54323	1.82507	0.011659	hypothetical protein"
MMARE11_16840	1.70222	0.767417	0.0116684	fatty acyl-AMP ligase FadD28"
MMARE11_12790	3.32141	1.73179	0.0116802	conserved hypothetical protein"
MMARE11_12480	0.692677	-0.529746	0.0117433	transcriptional regulatory protein Whib-like
MMARE11_37420	2.71275	1.43976	0.0118075	short-chain type dehydrogenase/reductase"
MMARE11_34590	3.25552	1.70289	0.0118183	conserved membrane protein"
MMARE11_11440	0.625018	-0.678031	0.0118363	homoserine O-acetyltransferase MetA"
MMARE11_09350	0.216264	-2.20913	0.0118466	malonyl CoA-acyl carrier protein transacylase,
MMARE11_00640	1.3605	0.444139	0.0118709	myo-inositol-1-phosphate synthase Ino1"
MMARE11_16170	3.41921	1.77366	0.0119024	conserved membrane protein"
MMARE11_15580	3.19417	1.67544	0.0119982	transcriptional regulatory protein
MMARE11_31950	0.479528	-1.06031	0.012066	glutamate-ammonia-ligase adenylyltransferase
MMARE11_26800	2.62483	1.39222	0.0120995	enoyl-CoA hydratase, EchA8_6"
MMARE11_27760	8.17737	3.03164	0.0121629	Short-chain fatty acids transporter"
MMARE11_04760	8.20511	3.03652	0.0122072	conserved hypothetical protein"
MMARE11_07590	2.4591	1.29813	0.0122079	short-chain type oxidoreductase"
MMARE11_35280	3.39756	1.7645	0.0122125	cationic amino acid transport integral membrane
MMARE11_36190	0.243174	-2.03994	0.0122507	conserved hypothetical protein"
MMARE11_46750	15.8777	3.98893	0.0122545	integral membrane protein"
MMARE11_29920	3.73973	1.90293	0.0122872	conserved hypothetical alanine and proline rich
MMARE11_11670	0.439959	-1.18456	0.0123035	adenosine deaminase Add"
MMARE11_08710	0.376433	-1.40953	0.0123384	'tRNA-Tyr(gta)'"
MMARE11_11360	0.496062	-1.01141	0.0123429	bifunctional protein: methylenetetrahydrofolate
MMARE11_31940	0.282231	-1.82505	0.0123774	conserved hypothetical protein"
MMARE11_37030	2.27937	1.18864	0.0123786	conserved hypothetical protein"
MMARE11_43220	0.530142	-0.915549	0.0123786	conserved membrane protein"
MMARE11_39240	2.48595	1.3138	0.0124042	peptidase S15"
MMARE11_01470	5.50555	2.46089	0.0124166	conserved secreted protein"
MMARE11_39520	0.581435	-0.782311	0.0124357	conserved hydrolase"
MMARE11_42360	0.283455	-1.81881	0.0124427	conserved hypothetical protein"
MMARE11_06300	0.555945	-0.846985	0.0124567	adenylosuccinate synthetase PurA"
MMARE11_25840	0.65919	-0.601235	0.0124612	conserved membrane protein"
MMARE11_33940	5.62213	2.49112	0.0124641	phosphofructokinase, PfkB_1"
MMARE11_41490	0.462387	-1.11283	0.0125044	pyruvate, phosphate dikinase PpdK"
MMARE11_00220	0.665946	-0.586523	0.0125671	'tRNA-Ser(cag)'"
MMARE11_50510	0.414373	-1.271	0.0126199	DNA polymerase III (epsilon subunit) DnaQ"
MMARE11_43740	0.128004	-2.96574	0.0126272	PE-PGRS family protein"
MMARE11_20750	5.85508	2.54969	0.0126754	conserved hypothetical protein"
MMARE11_48100	4.02545	2.00915	0.0127943	conserved hypothetical fructosamine kinase-like
MMARE11_16980	1.82606	0.868733	0.0127946	hypothetical protein"
MMARE11_17040	0.419237	-1.25416	0.0128629	formamidopyrimidine-DNA glycosylase Fpg"
MMARE11_32400	0.666086	-0.58622	0.0129101	3-oxoacyl-[acyl-carrier protein] synthase 2
MMARE11_04220	0.286565	-1.80307	0.0129344	conserved hypothetical membrane protein"
MMARE11_20670	2.5499	1.35044	0.0130596	Zn-dependent glyoxylase"
MMARE11_48970	0.582189	-0.780442	0.0130962	4-diphosphocytidyl-2C-methyl-D-erythritol
MMARE11_23850	1.71485	0.77808	0.0131221	N-acetyl-gamma-glutamyl-phosphate reductase
MMARE11_22420	0.472031	-1.08305	0.0131237	pyridoxal phosphate-dependent enzyme, WecE"
MMARE11_48120	2.44134	1.28767	0.0131545	enoyl-CoA hydratase EchA19"
MMARE11_04260	0.554517	-0.850696	0.0131842	conserved hypothetical protein"
MMARE11_39430	0.289762	-1.78706	0.0132555	sulfate adenylyltransferase subunit 2 CysD"
MMARE11_21180	0.492465	-1.02191	0.0132589	dihydroorotase PyrC"
MMARE11_17630	1.63951	0.713263	0.0133384	hypothetical protein"
MMARE11_06600	0.508367	-0.976059	0.013352	acetate kinase AckA"
MMARE11_02440	4.3628	2.12525	0.0134328	PPE family protein, PPE1"
MMARE11_41460	3.22681	1.69011	0.0135631	5-methyltetrahydropteroyltriglutamate--homocysteine
MMARE11_43730	0.184735	-2.43647	0.0135747	PE-PGRS family protein"
MMARE11_16350	0.463178	-1.11036	0.0135997	3-isopropylmalate dehydrogenase LeuB"
MMARE11_50890	0.267346	-1.90322	0.0136626	multi-functional enzyme with acyl-CoA-reductase
MMARE11_40500	10.0919	3.33513	0.0137332	hypothetical protein"
MMARE11_24860	0.340486	-1.55433	0.0137511	'acyltransferase, WS/DGAT/MGAT'"
MMARE11_21520	0.249907	-2.00054	0.0137576	transcriptional regulatory protein WhiA"
MMARE11_31960	1.9445	0.959396	0.0138197	glutamine synthetase GlnA2"
MMARE11_13120	1.77089	0.824471	0.0138239	conserved alanine and valine rich protein"
MMARE11_51670	3.28506	1.71592	0.0138706	dTDP-glucose-4,6-dehydratase, RmlB_1"
MMARE11_16910	0.539498	-0.890311	0.0138805	daunorubicin-DIM-transport ATP-binding protein
MMARE11_31430	0.4514	-1.14752	0.013951	conserved transmembrane protein"
MMARE11_50500	2.91312	1.54257	0.0140291	conserved hypothetical membrane protein"
MMARE11_47770	3.32762	1.73449	0.014074	short-chain type dehydrogenase/reductase"
MMARE11_15050	3.12423	1.6435	0.0140877	hypothetical protein"
MMARE11_14590	40.2997	5.3327	0.0141817	conserved hypothetical protein"
MMARE11_48620	0.377664	-1.40483	0.0142645	PPE family protein"
MMARE11_48880	11.4772	3.5207	0.0142783	permease component of an ABC-type transporter"
MMARE11_11030	2.4013	1.26381	0.014312	hydrolase"
MMARE11_34240	3.82471	1.93535	0.0143274	transcriptional regulator (IclR family)"
MMARE11_05970	0.695522	-0.523831	0.0143558	conserved secreted protein"
MMARE11_17550	0.615018	-0.7013	0.0144277	integral membrane phosphatidate
MMARE11_09450	0.623884	-0.68065	0.0144385	ribonucleotide-transport ATP-binding protein ABC
MMARE11_39830	2.32502	1.21724	0.0144411	conserved hypothetical protein"
MMARE11_30100	2.46161	1.2996	0.0144512	conserved protein"
MMARE11_26180	0.450051	-1.15184	0.0144906	acetolactate synthase IlvG"
MMARE11_27290	6.84564	2.77518	0.014505	DNA-binding transcriptional regulator EnvR"
MMARE11_33340	3.82562	1.93569	0.0145323	conserved hypothetical membrane protein"
MMARE11_20940	0.403081	-1.31086	0.0146436	conserved membrane protein"
MMARE11_23920	0.547865	-0.868107	0.014725	argininosuccinate lyase ArgH"
MMARE11_05770	0.347526	-1.52481	0.0147322	conserved threonine-rich hypothetical protein"
MMARE11_31260	1.75538	0.811786	0.0147385	conserved hypothetical integral membrane
MMARE11_25690	0.56003	-0.836425	0.0147459	oxidoreductase"
MMARE11_45080	0.449859	-1.15246	0.0148184	conserved hypothetical protein"
MMARE11_06580	0.610452	-0.712049	0.0148641	F420-dependent glucose-6-phosphate dehydrogenase
MMARE11_18670	0.190229	-2.39419	0.0149349	conserved hypothetical secreted protein"
MMARE11_36660	1.89021	0.918549	0.0149689	glutamine-dependent NAD(+) synthetase NadE"
MMARE11_40990	2.78629	1.47834	0.0151178	transcriptional regulatory protein"
MMARE11_30260	2.29703	1.19977	0.0152153	phosphoribosyl-AMP pyrophosphatase HisE"
MMARE11_38640	0.508954	-0.974393	0.0152979	MCE-family lipoprotein LprM_1"
MMARE11_45530	2.9979	1.58395	0.015388	conserved hypothetical metal-dependent
MMARE11_21220	0.362682	-1.46322	0.0154577	orotidine 5'-phosphate decarboxylase PyrF"
MMARE11_04370	0.416046	-1.26518	0.0154611	conserved transmembrane protein"
MMARE11_41240	0.293738	-1.7674	0.0154698	oxidoreductase"
MMARE11p_00670	0.201081	-2.31415	0.0155247	Flp pilus assembly protein, ATPase CpaE"
MMARE11_15240	0.334234	-1.58107	0.0155567	succinate-semialdehyde dehydrogenase [NADP+]
MMARE11_20920	0.514709	-0.958171	0.0155963	alanyl-tRNA synthetase AlaS"
MMARE11_10840	1.26399	0.337989	0.0156497	60 kDa chaperone (GroEL1)"
MMARE11_33630	3.26483	1.70701	0.0156892	aminotransferase"
MMARE11_25080	3.56335	1.83324	0.0157384	Z-decaprenyl diphosphate synthase"
MMARE11_45240	11.4705	3.51985	0.0160607	conserved hypothetical membrane protein"
MMARE11_07270	1.42195	0.507872	0.016081	conserved secreted protein"
MMARE11_40100	1.99901	0.999289	0.0162293	malate dehydrogenase Mdh"
MMARE11_21340	4.78679	2.25906	0.0162866	methyltransferase"
MMARE11_05070	0.494328	-1.01646	0.0163464	membrane-anchored mycosin MycP3"
MMARE11_27020	2.70655	1.43646	0.016413	NADP-dependent alcohol dehydrogenase AdhC"
MMARE11_25580	2.13573	1.09473	0.0164438	conserved hypothetical protein"
MMARE11_47530	0.349212	-1.51783	0.0165154	'tRNA-Thr(tgt)'"
MMARE11_21270	1.43217	0.518207	0.0166246	s-adenosylmethionine synthetase MetK"
MMARE11_02420	5.17145	2.37057	0.0166408	conserved hypothetical protein"
MMARE11_44900	1.69978	0.765349	0.0166541	resuscitation-promoting factor RpfA"
MMARE11_13110	0.282958	-1.82134	0.0166569	Soj/ParA-related protein"
MMARE11_44570	2.07157	1.05072	0.016688	conserved hypothetical protein"
MMARE11_50930	3.52632	1.81816	0.0167117	transcriptional regulatory protein (probably
MMARE11_25720	3.17689	1.66761	0.0168324	transcriptional regulatory protein"
MMARE11_17690	0.634293	-0.656778	0.01687	conserved hypothetical protein"
MMARE11_08040	0.496528	-1.01005	0.0168718	conserved hypothetical protein"
MMARE11_23650	2.79304	1.48184	0.0168756	conserved protein"
MMARE11_42630	5.91492	2.56436	0.0168789	conserved hypothetical membrane protein"
MMARE11_05350	9.78756	3.29095	0.0168837	3-dehydroquinate synthase AroB_1"
MMARE11_04910	3.41885	1.77351	0.0169197	conserved protein"
MMARE11_37790	5.05272	2.33706	0.0169204	oxidoreductase"
MMARE11_31730	0.524205	-0.931797	0.0169477	non-ribosomal peptide synthetase"
MMARE11_04100	0.610127	-0.712818	0.016961	conserved transmembrane transport protein MmpL3"
MMARE11_10350	2.39818	1.26194	0.0169635	acyl-CoA dehydrogenase, FadE9"
MMARE11_35530	0.521332	-0.939725	0.0169674	cysteine synthase a CysK1"
MMARE11_10960	0.669563	-0.578708	0.0170017	inosine-5'-monophosphate (imp) dehydrogenase,
MMARE11_24620	4.9519	2.30798	0.0171395	hypothetical protein"
MMARE11_31460	0.776173	-0.36555	0.0171465	transmembrane cytochrome C oxidase (subunit II)
MMARE11_04420	0.367909	-1.44258	0.0172223	PE-PGRS family protein"
MMARE11_51540	2.24271	1.16524	0.0172684	conserved protein"
MMARE11_38510	0.57511	-0.798091	0.0173456	conserved hypothetical metal-dependent
MMARE11_16340	0.509638	-0.972455	0.0173591	D-3-phosphoglycerate dehydrogenase SerA1"
MMARE11_03200	2.20985	1.14395	0.0174514	conserved protein"
MMARE11_25470	0.466408	-1.10034	0.0174766	oxidoreductase"
MMARE11_24290	0.524603	-0.930703	0.0175564	DNA repair protein, RecN"
MMARE11_26820	1.97493	0.981799	0.0176168	bacterioferritin BfrA"
MMARE11_29530	1.69667	0.762703	0.0177893	conserved hypothetical protein"
MMARE11_49290	0.516102	-0.954271	0.0178235	conserved transmembrane protein rich in alanine,
MMARE11_27230	1.87115	0.903925	0.017832	D-amino acid oxidase Aao"
MMARE11_42810	1.9062	0.930698	0.0178641	'tRNA-Gln(ttg)'"
MMARE11_01530	6.90157	2.78693	0.0179673	4-aminobutyrate aminotransferase, GabT_2"
MMARE11_00110	1.84487	0.883521	0.0179875	peptidyl-prolyl cis-trans isomerase A, PpiA"
MMARE11_07810	0.599749	-0.737568	0.0181328	conserved hypothetical protein"
MMARE11_02100	0.418473	-1.25679	0.0181373	conserved hypothetical protein"
MMARE11_47700	2.01237	1.0089	0.0181676	peroxidase BpoA"
MMARE11_14480	2.0983	1.06922	0.0181867	conserved ATPase"
MMARE11_34940	5.63091	2.49337	0.0181919	hypothetical protein"
MMARE11_09990	1.91297	0.935815	0.0182175	conserved protein"
MMARE11_20530	0.291207	-1.77988	0.0182789	PE-PGRS family protein"
MMARE11_12660	0.581954	-0.781023	0.0183099	two-component sensory transduction histidine
MMARE11_53060	1.65977	0.730986	0.0184536	thioredoxin reductase TrxB2"
MMARE11_23280	0.545991	-0.87305	0.0184609	cyanophycinase CphB"
MMARE11_22890	0.428793	-1.22165	0.0184769	ketoacyl reductase"
MMARE11_36110	0.557669	-0.842519	0.018489	acyl-[acyl-carrier protein] desaturase DesA1_1"
MMARE11_16250	2.08463	1.05979	0.018591	conserved lipoprotein LppZ"
MMARE11_44800	0.540198	-0.88844	0.0186158	conserved protein"
MMARE11_06060	0.365531	-1.45193	0.0186181	carbon monoxyde dehydrogenase (small chain),
MMARE11_22900	0.32455	-1.62349	0.0186741	conserved protein"
MMARE11_24000	3.09461	1.62976	0.0186866	D-amino acid oxidase Aao_1"
MMARE11_01460	3.36975	1.75264	0.0188657	conserved hypothetical membrane protein"
MMARE11_40170	2.70081	1.43339	0.0188659	sugar-transport integral membrane protein ABC
MMARE11_20880	1.69235	0.759024	0.0189278	proline and glycine rich transmembrane protein"
MMARE11_34770	16.442	4.03931	0.0189349	oxidoreductase"
MMARE11_47890	1.7805	0.832285	0.018966	conserved hypothetical secreted protein"
MMARE11_34890	0.247984	-2.01168	0.018988	PE-PGRS family protein"
MMARE11_32430	2.53781	1.34358	0.0191267	glycerol-3-phosphate dehydrogenase GlpD1"
MMARE11_19010	0.582543	-0.779563	0.0191727	recombinase A RecA"
MMARE11_04590	0.421671	-1.24581	0.0192912	conserved membrane protein"
MMARE11_02410	2.27855	1.18812	0.0193281	fatty-acid-CoA ligase FadD10"
MMARE11_20970	0.483694	-1.04783	0.0193441	chorismate synthase AroF"
MMARE11_30480	3.19134	1.67416	0.0194778	hypothetical protein"
MMARE11_13170	1.63322	0.707718	0.0194917	transcriptional regulator, TetR family"
MMARE11_09570	1.628	0.703105	0.0194964	conserved transmembrane transport protein,
MMARE11_19880	3.95688	1.98436	0.0195006	hypothetical protein"
MMARE11_40600	3.23598	1.6942	0.0195379	conserved hypothetical protein"
MMARE11_03980	0.461521	-1.11553	0.0195448	conserved integral membrane protein"
MMARE11_16040	2.49969	1.32175	0.0195786	conserved hypothetical protein"
MMARE11_19450	0.476667	-1.06895	0.0195975	conserved integral membrane alanine and leucine
MMARE11_14690	0.309355	-1.69267	0.0196364	conserved hypothetical dehydrogenase"
MMARE11_19020	0.372096	-1.42625	0.0197113	regulatory protein RecX"
MMARE11_27420	0.744882	-0.424917	0.019722	isocitrate lyase AceAb"
MMARE11_45650	2.72838	1.44805	0.0197655	cytochrome P450 150A5 Cyp150A5"
MMARE11_21830	2.33559	1.22379	0.0198125	unidentified antibiotic-transport integral
MMARE11_06320	4.4552	2.15549	0.0198821	conserved hypothetical regulatory protein"
MMARE11_26270	1.56839	0.649285	0.0199074	conserved protein"
MMARE11_51000	0.470244	-1.08852	0.0199289	non-ribosomal peptide synthetase"
MMARE11_08200	0.513582	-0.961333	0.0200083	glutamate-1-semialdehyde 2,1-aminomutase, HemL"
MMARE11_49890	0.612719	-0.706702	0.0201559	conserved hypothetical Zn-dependent hydrolase"
MMARE11_23960	0.440004	-1.18441	0.0202098	polyketide synthase Pks9"
MMARE11_04700	2.07618	1.05393	0.0202339	conserved hypothetical protein"
MMARE11_24770	0.15353	-2.7034	0.0202997	hypothetical protein"
MMARE11_00530	2.61302	1.38572	0.0203136	conserved hypothetical transmembrane protein"
MMARE11_46630	2.58036	1.36757	0.0203498	conserved hypothetical protein"
MMARE11_26140	2.98435	1.57742	0.0203808	conserved hypothetical protein"
MMARE11_13410	0.386774	-1.37044	0.0203931	FK-506 binding protein, peptidyl-prolyl
MMARE11_31000	0.652085	-0.616867	0.0204431	penicillin-binding membrane protein PbpB"
MMARE11_07760	0.688231	-0.539034	0.0204811	conserved protein"
MMARE11_02430	3.91484	1.96895	0.0204956	oxidoreductase"
MMARE11_24970	0.267472	-1.90254	0.0206102	metal cation transporter p-type ATPase a, CtpF"
MMARE11_26000	0.734028	-0.446092	0.0206383	conserved protein"
MMARE11_52000	0.562673	-0.829632	0.0206743	acyltransferase"
MMARE11_41190	1.96832	0.976962	0.0207716	conserved transmembrane transport protein
MMARE11_36090	3.0067	1.58818	0.0207739	Flavin-binding monooxygenase"
MMARE11_37210	2.68153	1.42306	0.0208009	cutinase precursor"
MMARE11_24560	0.24456	-2.03174	0.020814	cytidylate kinase, Cmk"
MMARE11_20640	0.607129	-0.719926	0.0208264	adenine phosphoribosyltransferase, Apt"
MMARE11_02860	1.52407	0.607929	0.0208271	conserved hypothetical secreted protein"
MMARE11_23380	0.544155	-0.87791	0.0208335	tryptophan synthase, alpha subunit TrpA"
MMARE11_43550	0.575819	-0.796312	0.0208399	bifunctional purine biosynthesis protein PurH"
MMARE11_40290	0.397494	-1.33099	0.0209367	methyltransferase"
MMARE11_26440	2.4285	1.28006	0.0209589	urease beta subunit UreB"
MMARE11_21890	1.77802	0.830274	0.0209644	conserved protein"
MMARE11_40700	8.01455	3.00262	0.0211166	conserved hypothetical protein"
MMARE11_07610	0.59791	-0.741999	0.0211195	mannosyltransferase"
MMARE11_22250	1.79134	0.841041	0.0211228	methylmalonyl-CoA mutase large subunit, MutB"
MMARE11_29090	4.41247	2.14158	0.0211513	2-hydroxyhepta-2,4-diene-1,7-dioate isomerase"
MMARE11_23090	0.59299	-0.75392	0.0211916	biotin synthase BioB"
MMARE11_30470	2.81164	1.49141	0.0212155	hypothetical protein"
MMARE11_23360	0.729743	-0.45454	0.0213111	indole-3-glycerol phosphate synthase TrpC"
MMARE11_45070	0.471002	-1.08619	0.0214747	fatty-acid-CoA racemase Far"
MMARE11_00040	0.364568	-1.45574	0.021488	conserved protein"
MMARE11_11130	2.06666	1.0473	0.021503	short-chain dehydrogenase, AcrA1"
MMARE11_49840	0.448694	-1.1562	0.0215529	conserved hypothetical protein"
MMARE11_20230	6.85018	2.77614	0.021642	ferredoxin FdxA_1"
MMARE11_15710	0.50363	-0.989564	0.0216768	FEIII-dicitrate-binding periplasmic lipoprotein
MMARE11_07080	4.41989	2.14401	0.0217083	conserved hypothetical protein"
MMARE11_05960	2.13753	1.09595	0.0217358	enoyl-CoA hydratase, EchA8_1"
MMARE11_04430	2.48563	1.31361	0.0217587	phosphotriesterase Php"
MMARE11_01990	0.519867	-0.943787	0.0218579	glutamine-transport transmembrane protein ABC
MMARE11_40260	0.590918	-0.758969	0.0218747	serine protease HtrA (DegP protein)"
MMARE11_31270	1.43818	0.524244	0.02217	1-acylglycerol-3-phosphate O-acyltransferase"
MMARE11_19720	3.16366	1.6616	0.0221738	exported alanine and valine rich protein"
MMARE11_39420	0.472397	-1.08193	0.0222653	bifunctional enzyme CysN/CysC: sulfate
MMARE11_04540	2.05003	1.03565	0.0223052	small secreted protein"
MMARE11_29100	3.19273	1.67479	0.0223569	3-(3-hydroxy-phenyl) propionate hydroxylase"
MMARE11_36840	0.563455	-0.827627	0.0224591	molybdopterin-guanine dinucleotide biosynthesis
MMARE11_26380	0.589255	-0.763035	0.0224854	inosine-5'-monophosphate dehydrogenase GuaB1"
MMARE11_12410	0.344082	-1.53918	0.0224988	dTDP-6-deoxy-L-lyxo-4-hexulose reductase RmlD"
MMARE11_07010	2.77115	1.47049	0.0225331	conserved hypothetical protein"
MMARE11_09490	1.85572	0.891979	0.0226108	ceramidase"
MMARE11_46540	2.0433	1.0309	0.0226476	ATP-dependent RNA helicase, RhlE1"
MMARE11_49430	0.140673	-2.82958	0.0226562	PPE family protein"
MMARE11_17860	0.316409	-1.66014	0.0226883	hydrogenase maturation factor, HypC"
MMARE11_35230	0.566134	-0.820785	0.0227381	conserved protein"
MMARE11_39880	3.3123	1.72783	0.0227913	conserved hypothetical Hit-like protein"
MMARE11_42450	5.75531	2.52489	0.0229264	aminomethyltransferase GcvT_2"
MMARE11_42340	0.512573	-0.964172	0.0229401	acid phosphatase precursor"
MMARE11_46900	1.48965	0.574972	0.0229587	amidophosphoribosyltransferase, PurF"
MMARE11_46610	3.06583	1.61628	0.0229772	hypothetical protein"
MMARE11_11170	5.6262	2.49216	0.0229875	conserved hypothetical protein"
MMARE11_05840	0.426583	-1.2291	0.0230225	PE-PGRS family protein"
MMARE11_21980	0.378346	-1.40222	0.0230443	thioredoxin TrxA"
MMARE11_35730	0.459145	-1.12298	0.0230478	PPE family protein"
MMARE11_35740	0.459145	-1.12298	0.0230651	PPE family protein"
MMARE11_44710	1.90901	0.932822	0.0230794	NADPH:adrenodoxin oxidoreductase FprB"
MMARE11_29850	2.79331	1.48197	0.0232672	conserved hypothetical membrane protein"
MMARE11_29860	2.79331	1.48197	0.0232678	conserved hypothetical membrane protein"
MMARE11_47280	0.180309	-2.47146	0.0232801	conserved protein"
MMARE11_02570	4.30607	2.10637	0.0233701	transcriptional regulatory protein"
MMARE11_25920	2.64476	1.40314	0.0235831	conserved hypothetical protein"
MMARE11_10280	0.665012	-0.588547	0.0235936	adenylate kinase (ATP-AMP transphosphorylase),
MMARE11_50210	0.525353	-0.928642	0.0235963	conserved hypothetical protein"
MMARE11_00960	0.413253	-1.2749	0.0235994	cellobiohydrolase a (1,4-beta-cellobiosidase a)
MMARE11_41780	0.231068	-2.11361	0.0236013	exodeoxyribonuclease vii (small subunit) XseB"
MMARE11_33410	0.573897	-0.801135	0.0238248	conserved hypothetical protein"
MMARE11_22720	1.95924	0.970296	0.0238429	methylase"
MMARE11_39510	0.442645	-1.17578	0.0240989	dehydrogenase fad flavoprotein Gmc
MMARE11_22240	1.85456	0.891078	0.0241712	methylmalonyl-CoA mutase small subunit, MutA"
MMARE11_50000	5.83111	2.54377	0.0241909	conserved hypothetical protein"
MMARE11p_00410	18.2308	4.18831	0.0242911	hypothetical protein"
MMARE11_39620	2.41742	1.27347	0.0243385	lipoprotein LprA"
MMARE11_16290	1.74826	0.805916	0.0245144	acetolactate synthase (large subunit) IlvB1"
MMARE11_44380	1.98038	0.985774	0.0246463	dioxygenase"
MMARE11_00570	1.93403	0.951611	0.0249197	short-chain type oxidoreductase"
MMARE11_12510	0.651818	-0.617458	0.0250521	phosphomannomutase PmmA"
MMARE11_20260	0.391809	-1.35178	0.0251258	conserved protein"
MMARE11_48980	0.774319	-0.369001	0.025126	conserved transcriptional regulatory protein"
MMARE11_00890	4.91324	2.29667	0.0251389	4-hydroxybenzoate synthetase (chorismate lyase)"
MMARE11_27960	0.20558	-2.28223	0.0252287	conserved hypothetical regulatory protein"
MMARE11_33950	1.62715	0.702351	0.0252594	conserved hypothetical protein"
MMARE11p_00250	1.9657	0.97504	0.025354	'serine/threonine-protein kinase'"
MMARE11_19890	0.419825	-1.25214	0.0253593	hypothetical protein"
MMARE11_48430	3.05872	1.61293	0.0254793	acetyl-CoA acetyltransferase FadA5"
MMARE11_27060	1.563	0.644314	0.0256892	conserved secreted protein"
MMARE11_19080	2.45611	1.29637	0.0257496	conserved hypothetical membrane protein"
MMARE11_41420	5.76967	2.52849	0.0257506	PPE family protein, PPE49"
MMARE11_04460	0.475034	-1.0739	0.025753	transcriptional regulatory protein (probably
MMARE11_24580	3.08316	1.62441	0.0257541	hypothetical protein"
MMARE11_52320	1.67952	0.748047	0.025772	immunogenic protein Mpt64"
MMARE11_23950	0.434249	-1.20341	0.0257774	polyketide synthase, Pks8"
MMARE11_40440	0.545411	-0.874584	0.0258573	fatty-acid-CoA ligase FadD6"
MMARE11_46710	0.484076	-1.04669	0.0259352	phosphate-binding protein 3 precursor, PhoS3"
MMARE11_10500	1.79536	0.844273	0.0259904	D-serine/D-alanine/glycine transporter, CycA"
MMARE11_07290	2.25642	1.17403	0.0260875	peptidase"
MMARE11_48770	2.49345	1.31814	0.0261487	conserved hypothetical oxidase"
MMARE11_24010	0.20667	-2.2746	0.0264095	hypothetical protein"
MMARE11_04610	0.509562	-0.972672	0.026425	acetyl-CoA acyltransferase FadA2"
MMARE11_38710	2.45865	1.29787	0.02649	conserved hypothetical transmembrane protein"
MMARE11_35910	1.66286	0.733663	0.0265183	heat shock protein transcriptional repressor
MMARE11_10850	2.17532	1.12123	0.026617	conserved hypothetical protein"
MMARE11_24130	7.29184	2.86628	0.0266825	antibiotic resistance ABC transporter, efflux
MMARE11_32320	0.628576	-0.669841	0.0267044	peroxiredoxin AhpE"
MMARE11_04580	0.526042	-0.92675	0.0267324	conserved transmembrane protein"
MMARE11_37550	0.240561	-2.05552	0.0267567	conserved hypothetical protein"
MMARE11_22040	1.60163	0.679545	0.026785	aconitate hydratase Acn"
MMARE11_34910	3.22113	1.68756	0.0268045	conserved hypothetical membrane protein"
MMARE11_11450	0.700925	-0.512668	0.0268371	O-acetylhomoserine sulfhydrylase MetC"
MMARE11_26830	1.80624	0.852993	0.0268481	conserved hypothetical protein"
MMARE11_09580	2.57728	1.36585	0.0268762	conserved transmembrane proteinm, MmpS5"
MMARE11_10460	1.56545	0.646579	0.0269013	30S ribosomal protein S4, RpsD"
MMARE11_47690	1.68107	0.749381	0.0269977	conserved hypothetical protein"
MMARE11_19700	2.66257	1.41282	0.0271304	conserved hypothetical protein"
MMARE11_19550	1.58869	0.667841	0.0271392	conserved protein"
MMARE11_43890	0.583803	-0.776446	0.0271627	transmembrane serine/threonine-protein kinase D
MMARE11_41100	0.602112	-0.731896	0.0271769	conserved protein"
MMARE11_23740	0.459098	-1.12313	0.0271991	23S rRNA methyltransferase TsnR"
MMARE11_32830	5.67539	2.50472	0.0272238	conserved hypothetical membrane protein"
MMARE11_49670	5.42991	2.44093	0.0273259	conserved hypothetical membrane protein"
MMARE11_42830	2.0094	1.00677	0.0273709	ribose-phosphate pyrophosphokinase PrsA"
MMARE11_12900	6.82648	2.77114	0.0274026	conserved hypothetical protein"
MMARE11_31880	1.82247	0.865898	0.027412	lipoate biosynthesis protein a LipA"
MMARE11_38030	4.26631	2.09299	0.0275183	cytochrome P450 187A4 Cyp187A4"
MMARE11_38950	0.597809	-0.742243	0.0276138	conserved hypothetical protein"
MMARE11_08580	1.87252	0.904979	0.0276551	conserved protein"
MMARE11_49040	2.20766	1.14252	0.0277979	adenine glycosylase MutY"
MMARE11_47050	3.76293	1.91186	0.0278611	conserved hypothetical protein"
MMARE11_48910	0.470074	-1.08904	0.0279191	conserved hypothetical lactam utilization
MMARE11_00340	2.38573	1.25443	0.0280029	ABC transporter permease"
MMARE11_01590	9.08615	3.18367	0.028249	conserved membrane protein"
MMARE11_27170	0.27901	-1.84161	0.0283316	PE-PGRS family protein"
MMARE11_09000	2.24124	1.1643	0.0283851	conserved lipoprotein, LpqN"
MMARE11_09360	0.164768	-2.60149	0.0284043	carbohydrate kinase"
MMARE11_39300	1.67174	0.741347	0.0284533	adenylate cyclase"
MMARE11_43420	1.73293	0.793214	0.0284665	two-component sensor kinase MprB"
MMARE11_16240	2.60202	1.37963	0.0285087	oxidoreductase"
MMARE11_50970	2.46994	1.30448	0.0287847	conserved hypothetical protein"
MMARE11_52260	1.46693	0.5528	0.0287896	monooxygenase EthA"
MMARE11_36730	0.751428	-0.412293	0.0288146	50S ribosomal protein L27 RpmA"
MMARE11_00840	9.96159	3.31638	0.0288314	conserved membrane protein MmpS5_3"
MMARE11_31530	2.45003	1.2928	0.0288425	bifunctional cobalamin biosynthesis protein
MMARE11_15600	0.513176	-0.962473	0.0288958	PPE family protein"
MMARE11_24930	0.508245	-0.976405	0.028921	sugar transporter"
MMARE11_50360	0.447725	-1.15932	0.0289622	conserved hypothetical protein"
MMARE11_48940	0.549795	-0.863033	0.0289823	tRNA/rRNA methyltransferase"
MMARE11_20100	0.304738	-1.71436	0.0290856	PE-PGRS family protein"
MMARE11_29470	0.47848	-1.06347	0.0292764	hypothetical protein"
MMARE11_23370	0.56295	-0.828923	0.0292896	tryptophan synthase, beta subunit TrpB"
MMARE11_41000	5.92106	2.56586	0.0293175	PE family protein"
MMARE11_38810	0.470887	-1.08655	0.0293472	conserved glycosidase"
MMARE11_27630	2.14067	1.09806	0.0294366	conserved hypothetical membrane protein"
MMARE11_52110	2.1536	1.10675	0.0294635	prephenate dehydratase PheA"
MMARE11_44910	1.85873	0.894319	0.0294702	molybdenum cofactor biosynthesis protein E2
MMARE11_04670	2.20221	1.13895	0.0295461	succinate dehydrogenase (iron-sulfur subunit),
MMARE11_14500	0.496045	-1.01146	0.0295465	transfer-messenger RNA, SsrA"
MMARE11_09890	0.564282	-0.825513	0.0295747	50S ribosomal protein L2, RplB"
MMARE11_18940	1.64182	0.715296	0.0296126	transcriptional regulatory protein"
MMARE11_20980	0.361433	-1.4682	0.0296187	shikimate kinase AroK"
MMARE11_37190	0.702234	-0.509976	0.0297636	conserved hypothetical membrane protein"
MMARE11_27370	3.41839	1.77332	0.0297888	ArsR-type repressor"
MMARE11_43790	2.18137	1.12523	0.0298294	conserved hypothetical membrane protein"
MMARE11_01940	2.43293	1.2827	0.0298447	glycine dehydrogenase GcvB_1"
MMARE11_42200	2.15583	1.10824	0.0298563	conserved hypothetical protein"
MMARE11_06880	0.584303	-0.775213	0.0300822	two-component sensor and regulator"
MMARE11_41400	3.5366	1.82236	0.0301234	transposase"
MMARE11_25040	0.484913	-1.0442	0.0303527	transcriptional accessory protein Tex"
MMARE11_23720	0.443457	-1.17313	0.0303757	50S ribosomal protein L35, RpmL"
MMARE11_15180	0.191195	-2.38689	0.0304099	PE-PGRS family protein"
MMARE11_35660	2.09794	1.06897	0.030482	conserved hypothetical transmembrane protein"
MMARE11_06630	1.82697	0.869449	0.0305683	glutamine-binding lipoprotein GlnH"
MMARE11_06180	2.32429	1.21679	0.0305683	conserved transmembrane protein"
MMARE11_15990	0.527975	-0.921458	0.0307147	conserved hypothetical membrane protein"
MMARE11_50300	0.0849757	-3.55681	0.0307162	PE-PGRS family protein, PE_PGRS9_2"
MMARE11_10710	3.10386	1.63406	0.0308077	conserved hypothetical transmembrane protein"
MMARE11_52190	1.6757	0.744767	0.0308204	conserved hypothetical membrane protein"
MMARE11_36820	0.504628	-0.986708	0.0309125	conserved membrane protein"
MMARE11_36620	0.432696	-1.20857	0.0309187	adenylate or guanylate cyclase"
MMARE11_18520	2.13683	1.09547	0.0311272	conserved hypothetical protein"
MMARE11_11890	3.79901	1.92562	0.0312369	conserved hypothetical protein"
MMARE11_27220	1.41782	0.503678	0.0312444	conserved hypothetical protein"
MMARE11_24550	0.421655	-1.24587	0.0312748	pseudouridylate synthase"
MMARE11p_00120	2.53611	1.34262	0.0313556	hypothetical protein"
MMARE11_22400	0.505319	-0.984733	0.0313615	conserved hypothetical protein"
MMARE11_07530	1.52804	0.611687	0.0314345	conserved membrane protein"
MMARE11_20830	0.44889	-1.15556	0.0315067	conserved hypothetical protein"
MMARE11_14630	0.370376	-1.43294	0.0315323	PPE family protein"
MMARE11_01550	13.5825	3.76368	0.0316432	conserved protein"
MMARE11_20580	2.00462	1.00333	0.0316623	fatty-acid-CoA ligase FadD9"
MMARE11_21810	0.513855	-0.960567	0.0316735	quinone reductase Qor"
MMARE11_53110	0.498556	-1.00417	0.0316736	chromosome partitioning protein ParA"
MMARE11_19190	1.99267	0.994705	0.0318454	conserved hypothetical protein"
MMARE11_35790	2.23399	1.15962	0.0319322	long (C50) chain Z-isoprenyl diphosphate
MMARE11_16880	1.5529	0.634964	0.0319365	conserved polyketide synthase associated protein
MMARE11_35160	16.3118	4.02784	0.0320627	hypothetical protein"
MMARE11_37630	2.06563	1.04658	0.0321106	acetoin dehydrogenase E2 subunit
MMARE11_21560	2.16904	1.11706	0.0321789	conserved hypothetical protein"
MMARE11_21530	1.71698	0.779874	0.0321928	conserved hypothetical protein"
MMARE11_08720	2.30675	1.20586	0.0323393	ABC-type transporter"
MMARE11_03520	2.89807	1.53509	0.0323508	conserved hypothetical regulatory protein"
MMARE11_25450	0.346832	-1.52769	0.032516	conserved hypothetical protein"
MMARE11_35180	3.31501	1.72901	0.0328598	metal cation transporter p-type ATPase a"
MMARE11_23410	2.0323	1.02312	0.0328753	conserved hypothetical membrane protein"
MMARE11_06890	0.550947	-0.860013	0.0328917	conserved hypothetical protein"
MMARE11_28510	0.378146	-1.40299	0.0330025	cytochrome P450 147G1 Cyp147G1"
MMARE11_51330	1.98646	0.990197	0.03309	hydrolase"
MMARE11_13100	0.360342	-1.47256	0.0331316	phosphoglycerate mutase Gpm2"
MMARE11_39750	4.12997	2.04613	0.0331376	glyoxalase, GloA_3"
MMARE11_48840	3.03734	1.60281	0.0331518	transcriptional regulatory protein
MMARE11_13310	1.68723	0.754656	0.0331712	ATP-dependent DNA helicase II UvrD2"
MMARE11_39230	3.11702	1.64017	0.0331961	haloalkane dehalogenase DhaA"
MMARE11_47060	2.23404	1.15966	0.0332079	conserved hypothetical protein"
MMARE11_16710	2.62119	1.39022	0.0332856	conserved hypothetical secreted protein"
MMARE11_06390	0.304983	-1.7132	0.0333616	conserved hypothetical transport protein"
MMARE11_18750	0.175879	-2.50734	0.0334084	PE-PGRS family protein"
MMARE11_07430	1.70771	0.772059	0.033535	3-hydroxybutyryl-CoA dehydrogenase FadB2"
MMARE11_31990	1.6089	0.686076	0.0335745	exported protease"
MMARE11_32930	1.78202	0.833517	0.0337719	hypothetical protein"
MMARE11_36070	1.75448	0.811046	0.0338088	short-chain membrane-associated dehydrogenase"
MMARE11_05150	2.41359	1.27118	0.0339077	conserved hypothetical membrane protein"
MMARE11_44450	0.375601	-1.41273	0.0339276	PPE family protein"
MMARE11_03860	2.01351	1.00972	0.0339891	conserved transmembrane protein"
MMARE11_50630	0.590568	-0.759825	0.0341643	conserved membrane protein"
MMARE11_03880	2.43477	1.28378	0.0342328	conserved protein"
MMARE11_42870	0.543023	-0.880916	0.0343682	peptidyl-tRNA hydrolase Pth"
MMARE11_43400	0.603105	-0.729518	0.0343937	pterin-4-alpha-carbinolamine dehydratase MoaB2"
MMARE11_49180	2.99845	1.58422	0.0344124	fructose-2,6-bisphosphatase GpmB"
MMARE11_45320	0.27143	-1.88135	0.0344581	MCE-family lipoprotein"
MMARE11_37250	4.08016	2.02863	0.0345168	hypothetical protein"
MMARE11_11050	3.30475	1.72454	0.0346092	transcriptional regulatory protein"
MMARE11_46840	2.01396	1.01003	0.0347063	metal cation transporter p-type ATPase, CtpV"
MMARE11_23120	1.92874	0.947662	0.0347144	conserved hypothetical membrane protein"
MMARE11_48420	2.11305	1.07933	0.0347326	cytochrome P450 125A7 Cyp125A7"
MMARE11_07120	2.00681	1.0049	0.0348432	D-amino acid aminohydrolase"
MMARE11_51990	0.505692	-0.983669	0.0348645	acyltransferase"
MMARE11_51970	0.471989	-1.08317	0.0348707	conserved hypothetical protein"
MMARE11_37240	1.62923	0.704188	0.0349082	conserved hypothetical secreted protein"
MMARE11_46650	0.577576	-0.791917	0.034997	transcriptional regulator"
MMARE11_32440	5.3704	2.42503	0.035053	transcriptional regulatory protein"
MMARE11_00260	3.00274	1.58628	0.0351569	hypothetical protein"
MMARE11_08420	2.14346	1.09994	0.0352063	Glyoxalase"
MMARE11_22120	0.60291	-0.729986	0.0352467	enoyl-[acyl-carrier-protein] reductase, InhA"
MMARE11_42460	3.73586	1.90144	0.0354199	conserved hypothetical dehydrogenase"
MMARE11_15610	1.7355	0.795351	0.0355039	glutaredoxin electron transport component of
MMARE11_42160	0.578132	-0.79053	0.0355411	enoyl-CoA hydratase EchA8"
MMARE11_35840	0.571251	-0.807804	0.0355498	conserved hypothetical membrane protein"
MMARE11_43340	0.280075	-1.83611	0.0356394	molybdopterin biosynthesis protein MoeA1"
MMARE11_48460	2.44842	1.29185	0.0357035	short-chain type dehydrogenase/reductase"
MMARE11_45370	0.32635	-1.61551	0.0357586	conserved hypothetical membrane protein"
MMARE11_00710	0.593138	-0.75356	0.0357976	30S ribosomal protein S6 RpsF"
MMARE11_05050	0.667343	-0.5835	0.0358029	conserved protein"
MMARE11_17480	0.703009	-0.508385	0.0358451	amidase AmiC"
MMARE11_43580	0.672461	-0.572478	0.0358905	conserved transmembrane protein"
MMARE11_34750	2.41902	1.27442	0.0358916	conserved hypothetical protein"
MMARE11_34400	2.9025	1.5373	0.0359034	conserved hypothetical protein"
MMARE11_03250	1.97013	0.978293	0.036114	transcriptional regulatory protein (possibly
MMARE11_34660	0.52096	-0.940754	0.0362353	PE-PGRS family protein, PE_PGRS39"
MMARE11_03410	0.542523	-0.882243	0.0362757	NAD(P) transhydrogenase (subunit alpha) PntAb"
MMARE11_31110	1.83132	0.872883	0.0363641	transmembrane serine/threonine-protein kinase L
MMARE11_12100	2.28155	1.19001	0.0363709	transcriptional regulatory protein (probably
MMARE11_09690	0.569487	-0.812265	0.0363995	ferredoxin reductase"
MMARE11_49970	1.50036	0.585313	0.0364194	'tRNA-Pro(cgg)'"
MMARE11_29980	0.457929	-1.1268	0.0364231	5'-3' exonuclease"
MMARE11_42120	0.335255	-1.57667	0.0364571	conserved hypothetical exported protein"
MMARE11_16390	1.94376	0.958853	0.0364639	conserved protein"
MMARE11_46550	2.17757	1.12272	0.036464	conserved hypothetical protein"
MMARE11_31790	0.14364	-2.79947	0.0364731	conserved hypothetical protein"
MMARE11_14870	0.433146	-1.20708	0.0366438	conserved hypothetical protein"
MMARE11_00060	0.73711	-0.440049	0.036661	DNA gyrase (subunit A) GyrA"
MMARE11_06670	0.428434	-1.22286	0.0368031	thiamine biosynthesis oxidoreductase ThiO"
MMARE11_00500	0.324939	-1.62176	0.0370039	conserved hypothetical protein"
MMARE11_24270	0.623485	-0.681573	0.0370917	cytotoxin/hemolysin, TlyA"
MMARE11_22500	0.346592	-1.52869	0.0371521	conserved hypothetical sugar kinase"
MMARE11_03190	0.270239	-1.88769	0.0371968	oxidoreductase"
MMARE11_52820	1.24818	0.319827	0.0372322	conserved hypothetical protein"
MMARE11p_00690	0.326519	-1.61476	0.0372695	type VII secretion-associated serine protease
MMARE11_45100	0.168578	-2.56851	0.0372721	conserved hypothetical protein"
MMARE11_07220	1.99214	0.994322	0.0373465	conserved membrane protein MmpS4_2"
MMARE11_29410	0.453371	-1.14124	0.0374108	conserved hypothetical protein"
MMARE11_35760	2.29927	1.20117	0.0374671	transcriptional regulatory protein (probably
MMARE11p_00630	0.34244	-1.54608	0.0375035	PPE-repeat proteins"
MMARE11_22650	0.580895	-0.783651	0.0375587	conserved hypothetical protein"
MMARE11_27490	0.546382	-0.872018	0.0375852	lipase LipD"
MMARE11_15350	2.6053	1.38145	0.0376051	'NAD-dependent epimerase/dehydratase family
MMARE11_52810	1.55303	0.635083	0.0376504	conserved hypothetical alanine and proline rich
MMARE11_12860	0.417304	-1.26083	0.0376518	3-phosphoshikimate 1-carboxyvinyltransferase
MMARE11_34110	0.31359	-1.67305	0.0376808	flavodoxin oxidoreductase"
MMARE11_27110	3.00329	1.58654	0.0376943	monooxygenase"
MMARE11_48130	1.84455	0.883271	0.0377084	cytochrome P450 142A3 Cyp142A3"
MMARE11_49820	1.90335	0.928543	0.037754	epoxide hydrolase EphE"
MMARE11_12060	1.76045	0.815947	0.0378191	ATP-dependent helicase Lhr"
MMARE11_39840	2.32702	1.21848	0.0378448	adenylate cyclase"
MMARE11_01660	4.31018	2.10775	0.037849	MCE-family protein Mce6C"
MMARE11_24740	0.477856	-1.06535	0.0379008	hypothetical protein"
MMARE11_16790	0.699572	-0.515456	0.0379534	chorismate pyruvate-lyase"
MMARE11_21250	1.57289	0.653415	0.0379707	DNA-directed RNA polymerase (omega chain) RpoZ"
MMARE11_07830	0.302432	-1.72532	0.0381827	carbon monoxyde dehydrogenase (small chain),
MMARE11_20590	1.84423	0.883015	0.0383463	4-aminobutyrate aminotransferase GabT"
MMARE11_07950	0.284213	-1.81496	0.0383674	delta-aminolevulinic acid dehydratase HemB"
MMARE11_25560	0.533515	-0.906398	0.0384792	conserved hypothetical protein"
MMARE11_42470	3.96909	1.98881	0.0384925	dioxygenase"
MMARE11_48690	2.47939	1.30999	0.0391004	aspartate aminotransferase AspB"
MMARE11_17610	3.67264	1.87682	0.039259	soluble secreted antigen Mpt53 precursor"
MMARE11_36540	0.521472	-0.939338	0.0392672	phosphoglycerate mutase, Gpm_1"
MMARE11_10550	2.15681	1.1089	0.0394285	cutinase precursor, Cut4"
MMARE11_40160	2.56413	1.35847	0.0394579	sugar-transport integral membrane protein ABC
MMARE11_23680	3.81382	1.93124	0.0395803	conserved hypothetical protein"
MMARE11_45780	2.87832	1.52523	0.039727	integral membrane transporter"
MMARE11_33660	0.425932	-1.2313	0.0397857	monophosphatase CysQ_1"
MMARE11_28300	10.6278	3.40976	0.0398484	methylenetetrahydromethanopterin reductase"
MMARE11_08050	2.00144	1.00104	0.03993	membrane acyltransferase"
MMARE11_26650	6.78517	2.76239	0.0400927	acetyltransferase"
MMARE11_45010	1.9321	0.95017	0.0401854	membrane-associated oxidoreductase"
MMARE11_34730	2.73176	1.44983	0.040253	transcriptional regulatory protein (probably
MMARE11_13520	0.624757	-0.678632	0.0402734	conserved hypothetical protein"
MMARE11_34060	0.460454	-1.11887	0.0402875	PE-PGRS family protein"
MMARE11_21600	0.202871	-2.30137	0.0402889	conserved hypothetical membrane protein"
MMARE11_00700	0.367919	-1.44254	0.0404536	transcriptional regulatory protein"
MMARE11_14450	0.543627	-0.87931	0.0404584	ssRNA-binding protein SmpB"
MMARE11_09180	0.780781	-0.357009	0.0408738	conserved protein"
MMARE11_39460	1.86332	0.897873	0.0409136	oligopeptide-transport integral membrane protein
MMARE11_40080	2.07955	1.05627	0.0410657	lipoprotein LpqZ"
MMARE11_21420	1.66207	0.732984	0.0411201	conserved lipoprotein LprG"
MMARE11_33790	1.94538	0.96005	0.04124	PE family protein"
MMARE11_40180	1.88335	0.913297	0.0412526	sugar-binding lipoprotein LpqY"
MMARE11_50460	1.47639	0.562072	0.0412594	drug-transport transmembrane ATP-binding protein
MMARE11_00170	0.592849	-0.754264	0.0412679	serine/threonine-protein kinase a PknA"
MMARE11_45180	2.76023	1.46479	0.0412987	conserved hypothetical secreted protein"
MMARE11_31690	0.313653	-1.67276	0.0413453	conserved transmembrane protein"
MMARE11_15260	2.93132	1.55155	0.0414353	hypothetical protein"
MMARE11_36560	1.91717	0.938982	0.0415292	nicotinate-nucleotide adenylyltransferase NadD"
MMARE11_34210	6.43938	2.68692	0.0415486	conserved hypothetical protein"
MMARE11_41900	2.33278	1.22205	0.041553	conserved hypothetical transmembrane protein"
MMARE11_42900	1.30367	0.382577	0.0416385	polyketide synthase Pks16"
MMARE11_02590	12.4984	3.64367	0.041653	ribosomal protein S18 RpsR2"
MMARE11_17700	0.541261	-0.885603	0.0417214	penicillin-binding lipoprotein"
MMARE11_17710	0.545707	-0.873802	0.0418324	conserved hypothetical protein"
MMARE11_49900	0.614764	-0.701895	0.04211	conserved protein with endoribonuclease L-PSP
MMARE11_02490	3.01786	1.59353	0.0421384	conserved hypothetical secreted protein"
MMARE11_08000	3.5661	1.83435	0.0423356	hypothetical protein"
MMARE11_25860	2.15716	1.10914	0.0423485	cytochrome P450 143A4 Cyp143A4"
MMARE11_36380	0.521003	-0.940638	0.0425084	conserved hypothetical protein"
MMARE11_50740	0.542893	-0.881259	0.0427141	conserved protein"
MMARE11_18360	1.96894	0.977419	0.0427765	trehalose or maltose hydrolase"
MMARE11_48600	1.7573	0.81336	0.0427768	acetyl-CoA acetyltransferase FadA6_1"
MMARE11_01810	1.98087	0.986134	0.0428326	conserved hypothetical alanine and proline rich
MMARE11_18550	0.585413	-0.772473	0.0429368	conserved hypothetical secreted protein"
MMARE11_36080	1.98989	0.99269	0.0429477	conserved hypothetical reductase"
MMARE11_07470	0.368168	-1.44157	0.0429508	conserved transmembrane protein"
MMARE11_08150	2.35475	1.23557	0.0430407	mandelate racemase"
MMARE11_26510	0.768097	-0.38064	0.043151	oxidoreductase"
MMARE11_13000	0.623807	-0.680829	0.0432355	iron-regulated short-chain
MMARE11_39040	1.31434	0.394334	0.0432513	conserved hypothetical membrane protein"
MMARE11_13060	2.55427	1.35291	0.0434021	conserved hypothetical protein"
MMARE11_47440	0.354142	-1.4976	0.043503	conserved hypothetical protein"
MMARE11_18190	1.48755	0.572942	0.0435088	conserved hypothetical protein"
MMARE11_48300	1.90474	0.929591	0.0435408	glutamate--cysteine ligase, Gcs2"
MMARE11_11190	2.24457	1.16644	0.043674	conserved hypothetical protein"
MMARE11_08860	0.423013	-1.24123	0.043711	arylsulfatase AtsA_1"
MMARE11_13810	0.599055	-0.739241	0.0437789	NADH dehydrogenase I (chain C) NuoC
MMARE11_20330	0.489112	-1.03176	0.044056	pi synthase PgsA1"
MMARE11_46730	1.34206	0.424447	0.0441282	transcriptional regulatory protein"
MMARE11_06330	0.467415	-1.09722	0.0441593	PPE family protein"
MMARE11_29180	0.193896	-2.36665	0.0445001	conserved hypothetical transmembrane protein"
MMARE11_28750	0.37917	-1.39908	0.044658	conserved hypothetical secreted protein"
MMARE11_36050	2.91874	1.54535	0.0446637	bifunctional enzyme MbtA: salicyl-AMP ligase
MMARE11_14720	2.35781	1.23745	0.0450041	conserved hypothetical protein"
MMARE11_39680	29.0865	4.86228	0.0450773	citrate (pro-3s)-lyase (beta subunit) CitE_1"
MMARE11_11660	0.445228	-1.16738	0.0450892	thymidine phosphorylase DeoA"
MMARE11_50220	0.519527	-0.944729	0.0451013	conserved membrane protein"
MMARE11_44100	0.5832	-0.777938	0.0451643	'DNA (cytosine-5-)-methyltransferase'"
MMARE11_33930	0.47483	-1.07452	0.0452269	conserved hypothetical membrane protein"
MMARE11_49320	0.374737	-1.41605	0.0452584	dihydroneopterin aldolase FolB"
MMARE11_51200	1.72905	0.789982	0.0453412	conserved hypothetical membrane protein"
MMARE11_11920	0.69952	-0.515562	0.0453494	glycerol-3-phosphate dehydrogenase GlpD2"
MMARE11_04920	2.40325	1.26499	0.0455131	conserved hypothetical membrane protein"
MMARE11_33070	2.2127	1.14581	0.0455627	maleate cis-trans isomerase"
MMARE11_20380	0.588651	-0.764516	0.0455837	acyl-CoA thioesterase II TesB2"
MMARE11_49210	2.55797	1.355	0.0456185	PE-PGRS family protein"
MMARE11_50250	0.427846	-1.22484	0.0456754	methanol dehydrogenase transcriptional
MMARE11_45380	0.424232	-1.23707	0.0456806	conserved hypothetical membrane protein"
MMARE11_34650	6.90385	2.7874	0.0459169	conserved hypothetical protein"
MMARE11_39160	6.90385	2.7874	0.0459464	hypothetical protein"
MMARE11_19940	2.94432	1.55793	0.0459718	hypothetical protein"
MMARE11_21910	1.60251	0.680334	0.0460045	cysteine desulfurase Csd"
MMARE11_37580	2.67806	1.42119	0.0461638	conserved hypothetical protein"
MMARE11_49850	0.429847	-1.21811	0.0461705	membrane-anchored thioredoxin-like protein"
MMARE11_21400	0.618232	-0.693781	0.0462037	bifunctional riboflavin biosynthesis protein
MMARE11_28640	1.94616	0.960632	0.0466548	conserved protein"
MMARE11_19560	0.741079	-0.4323	0.0467233	1-deoxy-D-xylulose 5-phosphate synthase Dxs1"
MMARE11_20760	2.5127	1.32924	0.0467839	dihydrodipicolinate synthase DapA_1"
MMARE11_34450	3.42425	1.77579	0.0469584	conserved hypothetical membrane protein"
MMARE11_33370	4.14069	2.04987	0.0471589	membrane-bound esterase LipM"
MMARE11_24880	2.25052	1.17026	0.0475231	conserved hypothetical secreted protein"
MMARE11_39120	0.537757	-0.894974	0.0476819	threonine synthase ThrC"
MMARE11_51510	0.600998	-0.734568	0.0477669	oxidoreductase"
MMARE11_16770	0.581693	-0.78167	0.0480029	ketoreductase"
MMARE11_28840	3.68398	1.88126	0.0480033	transcriptional regulatory protein"
MMARE11_27010	2.42267	1.2766	0.048008	conserved hypothetical protein"
MMARE11_37520	0.458166	-1.12606	0.0482204	MCE-family protein Mce5D"
MMARE11_28110	2.41648	1.27291	0.0482247	conserved hypothetical secreted protein"
MMARE11_43050	1.73622	0.795949	0.0482319	conserved hypothetical membrane protein"
MMARE11_30250	1.44813	0.534194	0.0482359	ATP phosphoribosyltransferase HisG"
MMARE11_31750	0.157879	-2.66311	0.0483884	conserved hypothetical protein"
MMARE11_44400	2.82252	1.49698	0.0484743	conserved hypothetical transmembrane protein"
MMARE11_47230	1.69876	0.764481	0.048508	conserved hypothetical regulatory protein"
MMARE11_18130	0.351075	-1.51015	0.0486784	cobyrinic acid a,C-diamide synthase CobB"
MMARE11_49520	0.498062	-1.0056	0.0487067	conserved hypothetical membrane protein"
MMARE11_40980	0.391307	-1.35363	0.04885	N-acetyl-1-D-myo-inosityl-2-amino-2-deoxy-alpha-D-glucopyranoside
MMARE11_40470	0.494338	-1.01643	0.0492189	succinyl-diaminopimelate desuccinylase DapE"
MMARE11_39470	1.92814	0.947208	0.0493028	oligopeptide-transport integral membrane protein
MMARE11_05420	0.430172	-1.21701	0.0493368	conserved hypothetical protein"
MMARE11_25600	3.10112	1.63279	0.0494115	conserved hypothetical protein"
MMARE11_03070	0.563309	-0.828002	0.0498631	conserved hypothetical protein"
MMARE11_29680	2.1028	1.07231	0.0498876	precorrin-8x methylmutase, CobH"
