# Supplementary material for: Integrated transcriptomic and proteomic analysis of pathogenic mycobacteria and their esx-1 mutants reveal secretion-dependent regulation of ESX-1 substrates and WhiB6 as a transcriptional regulator
Source: PLoS One. 2019 Jan 23;14(1):e0211003. doi: 10.1371/journal.pone.0211003 (PMC6343904; doi:10.1371/journal.pone.0211003)
Supplement: S8 Table — Restriction sites are shown in bold. (XLSX) [file pone.0211003.s008.xlsx]

## Sheet: ESX1_marinum (S1)
Complete list of genes of which expression is significantly changed in M. marinum eccCb1 transposon mutant vs wild-type strain during growth in 7H9 culture medium. P<0.05
Gene ID	foldChange	log2FoldChange	pval	Product
MMARE11_52760	0.129558	-2.94833	0	6 kDa early secretory antigenic target EsxA(EsaT-6)
MMARE11_52750	0.247521	-2.93595	6.24925e-246	Esat-6 like protein EsxB
MMARE11_52740	0.13968	-2.83981	8.1477e-220	PPE family protein
MMARE11_52730	0.12358	-3.01648	2.95998e-125	PE family protein
MMARE11_37690	0.345941	-1.5314	1.82005e-87	fatty acid synthase Fas
MMARE11_52650	0.269308	-1.89267	6.79683e-87	Esx-1 secretion associated protein EspE
MMARE11_52630	0.100376	-3.31652	1.22627e-80	conserved hypothetical protein, whiB6
MMARE11_52830	0.356977	-1.4861	7.75685e-68	Esx-1 secreted protein, EspB
MMARE11_22690	0.191635	-2.38357	2.03244e-58	hypothetical protein
MMARE11_52810	0.265596	-1.9127	2.77679e-52	Esx-1 secretion associated protein EspK
MMARE11_52790	0.377613	-1.40502	6.95497e-49	Esx-1 secretion associated protein EspJ
MMARE11_52820	0.32843	-1.60634	3.54156e-42	Esx-1 secretion associated protein EspL
MMARE11_33170	0.181458	-2.46229	3.79338e-42	pyruvate dikinase
MMARE11_34190	0.273402	-1.8709	6.13818e-41	hypothetical protein
MMARE11_18560	0.217295	-2.20228	1.18036e-39	secreted L-alanine dehydrogenase Ald (40 kDaantigen)
MMARE11_52670	0.384953	-1.37724	5.1464e-39	Esx-1 secretion associated protein EspG1
MMARE11_52660	0.402723	-1.31214	3.26482e-38	Esx-1 secretion associated protein EspF
MMARE11_52690	0.39447	-1.34201	3.29463e-38	type VII secretion protein EccA1
MMARE11_32390	0.275455	-1.86011	4.53395e-36	3-oxoacyl-[acyl-carrier protein] synthase 1KasA
MMARE11_32400	0.239692	-2.06075	4.70117e-35	3-oxoacyl-[acyl-carrier protein] synthase 2KasB
MMARE11_32380	0.29108	-1.78051	1.38584e-32	meromycolate extension acyl carrier proteinAcpM
MMARE11_02690	0.145014	-2.86631	9.17019e-32	PE-PGRS family protein, PE_PGRS1
MMARE11_46160	0.104602	-3.25702	4.71926e-31	PE-PGRS family protein
MMARE11_31390	0.182124	-2.45701	4.6571e-28	cytochrome C oxidase (subunit III) CtaE
MMARE11_20130	0.196801	-2.34519	9.02702e-27	conserved hypothetical protein
MMARE11_52680	0.428731	-1.22186	8.69266e-25	Esx-1 secretion associated protein EspH
MMARE11_52640	0.473032	-1.0932	3.43721e-22	conserved hypothetical regulatory protein
MMARE11_24740	20.0268	4.32386	1.04654e-21	hypothetical protein
MMARE11_01750	0.432274	-1.20771	7.81132e-21	PPE family protein
MMARE11_42610	0.270436	-1.88664	3.2837e-20	hypothetical membrane protein
MMARE11_46140	0.128611	-2.95892	1.03104e-19	pyruvate dehydrogenase (acetyl-transferring) E1component, alpha subunit
MMARE11_10500	0.370902	-1.43089	1.62599e-19	D-serine/D-alanine/glycine transporter, CycA
MMARE11_35721	0.358862	-1.4785	3.6995e-19	PPE family protein
MMARE11_07440	0.597773	-0.74233	9.87557e-19	mycolic acid synthase UmaA
MMARE11_35620	0.395847	-1.38582	1.79656e-18	EsaT-6 like protein EsxP_2
MMARE11_16810	0.424131	-1.23742	1.65199e-17	polyketide synthase Pks15/1
MMARE11_04610	0.308596	-1.69621	3.3875e-17	acetyl-CoA acyltransferase FadA2
MMARE11_47330	0.494461	-1.03672	1.88205e-16	serine/threonine-protein kinase PknF_2
MMARE11_04600	0.258187	-1.95351	6.13088e-16	3-oxoacyl-[acyl-carrier protein] reductaseFabG4
MMARE11_09460	0.401827	-1.31536	1.24033e-15	DNA-directed RNA polymerase, beta subunit, RpoB
MMARE11_32410	0.509392	-0.973152	1.54759e-15	acetyl/propionyl-CoA carboxylase (beta subunit)AccD6
MMARE11_42690	0.40908	-1.28955	2.25651e-15	EsaT-6 like protein EsxN_1
MMARE11_10960	0.450273	-1.1455	3.48185e-15	inosine-5-monophosphate (imp) dehydrogenase,GuaB2
MMARE11_17460	0.415389	-1.26746	3.9782e-15	30S ribosomal protein S2 RpsB
MMARE11_34010	0.172455	-2.5357	4.36255e-15	pyruvate dehydrogenase E1 component (alphasubunit)
MMARE11_43750	0.382255	-1.38739	6.00009e-15	PE-PGRS family protein, PE_PGRS2
MMARE11_23831	11.7285	3.55195	8.09792e-15	PE-PGRS family protein, PE_PGRS62_2
MMARE11_36110	0.275455	-1.86011	9.62632e-15	acyl-[acyl-carrier protein] desaturase DesA1_1
MMARE11_34020	0.0554399	-4.17293	3.13804e-14	pyruvate dehydrogenase E1 component (betasubunit)
MMARE11_45030	0.30318	-1.72175	4.99057e-14	acyl-CoA thiolase FadA
MMARE11_29160	0.45731	-0.717121	5.42643e-14	conserved membrane protein
MMARE11_35690	0.421863	-1.24515	5.67131e-14	EsaT-6 like protein EsxP_3
MMARE11_29390	11.0312	3.46351	7.80314e-14	conserved hypothetical membrane protein
MMARE11_34320	34.6766	5.11589	4.45758e-13	maltooligosyltrehalose synthase TreX_1
MMARE11_28350	0.362255	-1.46492	7.3786e-13	catalase-peroxidase-peroxynitritase T KatG
MMARE11_45020	0.337425	-1.56736	1.09577e-12	fatty oxidation protein FadB
MMARE11_42680	0.369344	-1.42269	1.20498e-12	EsaT-6 like protein EsxP
MMARE11_10830	2.66189	1.41245	2.31124e-12	10 kDa chaperone (GroES)
MMARE11_39100	0.34858	-1.52044	3.19655e-12	transcription termination factor Rho
MMARE11_46370	0.362255	-1.46492	3.96718e-12	phytoene synthase, CrtB
MMARE11_29720	2.20153	1.24856	3.99073e-12	conserved membrane transport protein, MmpS4_1
MMARE11_04150	0.430695	-1.12841	9.63145e-12	iron-regulated phosphoenolpyruvate carboxykinase[GTP] PckA
MMARE11_16470	0.427923	-1.22458	1.2646e-11	DNA-binding protein Hu, HupB
MMARE11_07490	0.365437	-1.48431	2.02382e-11	iron-regulated heparin binding hemagglutininHbhA
MMARE11_34030	0.0528017	-4.24327	3.24504e-11	pyruvate dehydrogenase (E2 component)
MMARE11_46150	0.159364	-2.6496	1.18874e-10	integral membrane protein
MMARE11_05870	0.273159	-1.87218	1.80866e-10	GrpE protein (Hsp-70 cofactor)
MMARE11_23720	0.328308	-1.60688	2.90619e-10	50S ribosomal protein L35, RpmL
MMARE11_10040	0.386033	-1.3732	3.18417e-10	50S ribosomal protein L5, RplE
MMARE11_31400	0.446526	-1.16318	5.75498e-10	ubiquinol-cytochrome C reductase QcrC
MMARE11_12480	0.440214	-1.18372	6.58844e-10	transcriptional regulatory protein Whib-likeWhiB2
MMARE11_23830	3.43345	1.77966	7.00436e-10	PE-PGRS family protein, PE_PGRS62_1
MMARE11_10050	0.424963	-1.23459	7.30643e-10	30S ribosomal protein S14, RpsN
MMARE11_14300	0.366241	-1.4861	9.78301e-10	two-component sensor histidine kinase DevS
MMARE11_49940	0.419227	-1.25769	1.35602e-09	transcriptional regulatory protein Whib-likeWhiB4
MMARE11_16970	0.388937	-1.36239	1.79665e-09	fatty acyl-AMP ligase FadD26, DIM biosynthesis
MMARE11_35610	0.440907	-1.19029	2.5682e-09	EsaT-6 like protein EsxN_3
MMARE11_20540	0.294631	-1.76302	3.08913e-09	PE-PGRS family protein, PE_PGRS44
MMARE11_05040	0.414572	-1.2703	4.14377e-09	EsaT-6 like protein EsxH
MMARE11_51890	0.564807	-0.824169	5.0747e-09	secreted antigen 85-A FbpA
MMARE11_04590	0.352494	-1.51369	8.09503e-09	conserved membrane protein, htdX
MMARE11_42130	0.400902	-1.31868	8.73817e-09	beta-ketoacyl CoA thiolase FadA3
MMARE11_14230	0.253731	-1.97863	9.06085e-09	acyl-CoA dehydrogenase FadE24
MMARE11_35718	0.401908	-1.31506	9.1692e-09	EsaT-6 like protein EsxP_4
MMARE11_09900	0.413234	-1.27497	1.75252e-08	50S ribosomal protein S19, RpsS
MMARE11_12300	0.371089	-1.43016	1.78064e-08	acyl-CoA dehydrogenase FadE25
MMARE11_23820	0.314849	-1.68194	1.79593e-08	PE-PGRS family protein, PE_PGRS62
MMARE11_23710	0.365611	-1.45162	2.61928e-08	initiation factor IF-3 InfC
MMARE11_51860	0.30318	-1.72175	3.29123e-08	fatty acyl-AMP ligase FadD32
MMARE11_16050	0.418383	-1.25711	3.29582e-08	electron transfer flavoprotein (beta-subunit)FixA
MMARE11_00060	0.375311	-1.41384	3.39664e-08	DNA gyrase (subunit A) GyrA
MMARE11_31000	0.478521	-1.06335	3.98829e-08	penicillin-binding membrane protein PbpB
MMARE11_16870	0.514115	-0.959837	4.00033e-08	multifunctional mycocerosic acid synthasemembrane-associated Mas
MMARE11_19270	0.45519	-1.13546	4.95524e-08	RNA polymerase sigma factor SigB
MMARE11_13670	0.421227	-1.24422	5.21244e-08	PPE family protein
MMARE11_19350	0.415799	-1.26604	7.49594e-08	RNA polymerase sigma factor SigA
MMARE11_12240	0.478658	-1.06293	9.22022e-08	propionyl-CoA carboxylase beta chain 5 AccD5
MMARE11_35710	0.446526	-1.16318	1.11849e-07	PPE family protein
MMARE11_05860	0.309096	-1.69387	1.13428e-07	chaperone protein DnaK
MMARE11_09270	0.39927	-1.32456	1.87346e-07	methoxy mycolic acid synthase 3, MmaA3
MMARE11_34120	0.345941	-1.5314	1.91878e-07	ferredoxin
MMARE11_42570	0.437728	-1.19189	1.96555e-07	cytochrome P450 138B1 Cyp138B1
MMARE11_22700	0.473797	-1.07766	2.03217e-07	conserved hypothetical protein
MMARE11_51380	3.73029	1.89929	2.05625e-07	conserved hypothetical protein
MMARE11_47280	0.510674	-0.969526	2.18119e-07	conserved protein
MMARE11_18460	2.56282	1.35773	2.20051e-07	lipid-transfer protein Ltp1
MMARE11_23730	0.436811	-1.19492	2.3603e-07	50S ribosomal protein L20 RplT
MMARE11_43410	0.648744	-0.624279	2.59606e-07	serine protease PepD
MMARE11_12700	0.600919	-0.734758	2.6181e-07	conserved protein
MMARE11_35630	0.739588	-0.435206	3.11044e-07	conserved hypothetical protein
MMARE11_31670	0.658909	-0.601848	4.19529e-07	conserved hypothetical MbtH-like protein
MMARE11_34110	0.319115	-1.64785	5.32862e-07	flavodoxin oxidoreductase
MMARE11_09760	1.83201	0.873428	5.85118e-07	Creatinine amidohydrolase
MMARE11_34130	0.366835	-1.4468	8.85192e-07	conserved hypothetical membrane protein
MMARE11_47920	0.712526	-0.488986	1.12212e-06	MCE-family protein Mce4F
MMARE11_34200	0.576266	-0.795193	1.23077e-06	Geranylgeranyl pyrophosphate synthase
MMARE11_33990	1.41712	0.502962	1.32833e-06	conserved hypothetical protein
MMARE11_49030	0.588174	-0.765685	1.36102e-06	carbonic anhydrase
MMARE11_15910	0.577915	-0.791071	1.42823e-06	conserved membrane protein
MMARE11_26860	0.341528	-1.54993	1.52438e-06	conserved hypothetical amidase
MMARE11_49880	1.27502	0.350526	1.58607e-06	conserved regulatory protein
MMARE11_14340	0.601356	-0.733708	1.59971e-06	conserved protein
MMARE11_06590	1.76066	0.816118	1.77433e-06	phosphate acetyltransferase Pta
MMARE11_41570	0.6927	-0.529698	1.82779e-06	6-phosphogluconate dehydrogenase,decarboxylating Gnd2
MMARE11_21760	0.634543	-0.65621	1.83984e-06	transketolase Tkt
MMARE11_41070	0.413234	-1.27497	2.16444e-06	conserved hypothetical secreted protein
MMARE11_34100	0.315085	-1.66619	2.26505e-06	coenzyme F420-reducing hydrogenase, gammasubunit
MMARE11_31010	0.66677	-0.584738	2.37783e-06	conserved proline rich membrane protein
MMARE11_10060	0.723842	-0.466253	2.73522e-06	30S ribosomal protein S8, RpsH
MMARE11_51850	0.787921	-0.343878	3.29092e-06	polyketide synthase Pks13
MMARE11_09660	0.833547	-0.262665	3.50946e-06	iron-regulated elongation factor Ef-tu, Tuf
MMARE11_34890	0.556199	-0.846327	3.72838e-06	PE-PGRS family protein
MMARE11_23150	0.6482	-0.625489	3.97848e-06	l-aspartate oxidase NadB
MMARE11_09770	1.64148	0.714994	4.65808e-06	membrane glycosyl transferase
MMARE11_46530	1.16853	0.224694	4.75148e-06	cold shock protein a, CspA
MMARE11_49020	0.659957	-0.599556	4.75713e-06	conserved membrane protein
MMARE11_51370	3.60442	1.84977	4.82841e-06	conserved membrane protein
MMARE11_51880	0.747536	-0.419785	5.07457e-06	secreted Mpt51/Mpb51 antigen protein FbpD
MMARE11_04580	0.597773	-0.74233	5.69904e-06	conserved transmembrane protein
MMARE11_24440	0.480096	-1.05861	5.70305e-06	PPE family protein
MMARE11_06070	0.645385	-0.631767	5.90063e-06	carbon monoxyde dehydrogenase (large chain),CoxL
MMARE11_33950	0.564833	-0.824103	6.28021e-06	conserved hypothetical protein
MMARE11_04850	0.758266	-0.399223	6.71136e-06	fatty-acid-CoA ligase FadD2
MMARE11_21270	0.71635	-0.481263	6.7312e-06	s-adenosylmethionine synthetase MetK
MMARE11_07930	0.635076	-0.654998	7.2682e-06	porphobilinogen deaminase HemC
MMARE11_33160	0.205312	-2.28411	7.62567e-06	dihydroorotate dehydrogenase
MMARE11_07790	1.42768	0.513675	7.74963e-06	conserved protein
MMARE11_42560	0.478658	-1.06293	7.87364e-06	conserved transmembrane transport protein, MmpL
MMARE11_27900	1.7983	0.846633	8.72069e-06	conserved hypothetical membrane protein
MMARE11_52710	1.78305	0.834346	9.56748e-06	type VII secretion EccCa1
MMARE11_39000	0.829593	-0.269525	9.67461e-06	ATP synthase delta chain AtpH
MMARE11_43400	0.649038	-0.623626	1.18101e-05	pterin-4-alpha-carbinolamine dehydratase MoaB2
MMARE11_05950	0.691188	-0.532849	1.19147e-05	endopeptidase ATP binding protein (chain B)ClpB
MMARE11_00710	0.71373	-0.48655	1.27072e-05	30S ribosomal protein S6 RpsF
MMARE11_16310	0.713463	-0.487089	1.2899e-05	ketol-acid reductoisomerase IlvC
MMARE11_46400	0.82538	-0.27687	1.34534e-05	conserved transmembrane transport proteinMmpL13_1
MMARE11_20880	0.616324	-0.698238	1.71963e-05	proline and glycine rich transmembrane protein
MMARE11_21420	0.61687	-0.696961	1.74856e-05	conserved lipoprotein LprG
MMARE11_16920	0.542285	-0.882877	1.88997e-05	phenolpthiocerol synthesis type-I polyketidesynthase PpsE
MMARE11_31350	0.763998	-0.388358	1.98832e-05	conserved hypothetical secreted protein
MMARE11_52720	2.34099	1.22712	2.08545e-05	type VII secretion EccCb1
MMARE11_49870	1.51793	0.602108	2.16031e-05	conserved hypothetical membrane protein
MMARE11_35670	0.442517	-1.17777	2.21716e-05	EsaT-6 like protein EsxN_4
MMARE11_30740	1.578	0.658097	2.22732e-05	conserved protein MbtH
MMARE11_05700	0.760307	-0.395346	2.38393e-05	aspartate aminotransferase AspC
MMARE11_05690	0.760257	-0.395441	2.41273e-05	iron-sulphur-binding reductase
MMARE11_26820	0.542285	-0.882877	2.54353e-05	bacterioferritin BfrA
MMARE11_22770	0.723452	-0.467031	2.70213e-05	conserved polyketide synthase associated proteinPapA3
MMARE11_52260	0.644139	-0.634556	2.75667e-05	monooxygenase EthA
MMARE11_25100	0.697062	-0.520642	2.79112e-05	PPE family protein, PPE8
MMARE11_16060	0.76334	-0.389602	2.79461e-05	electron transfer flavoprotein (alpha-subunit)FixB
MMARE11_28140	0.667332	-0.583524	2.91786e-05	PE family protein
MMARE11_16770	0.673561	-0.57012	3.1334e-05	ketoreductase
MMARE11_00050	0.42493	-1.2347	3.19188e-05	DNA gyrase (subunit B) GyrB
MMARE11_10460	0.648921	-0.623885	3.2339e-05	30S ribosomal protein S4, RpsD
MMARE11_09210	0.793478	-0.333738	3.26565e-05	transcription antitermination protein, NusG
MMARE11_36790	0.687075	-0.54146	3.37796e-05	valyl-tRNA synthetase protein ValS
MMARE11_43740	0.517649	-0.949955	3.54875e-05	PE-PGRS family protein
MMARE11_04460	2.01426	1.01025	3.69828e-05	transcriptional regulatory protein (probablyTetR/AcrR-family)
MMARE11_33860	0.349346	-1.51727	3.87448e-05	ketoacyl-acyl carrier protein synthase III
MMARE11_01740	0.733688	-0.446761	3.9917e-05	PE family protein, PE35
MMARE11_05240	0.567225	-0.818008	4.08519e-05	beta-1,3-glucanase precursor
MMARE11_35714	0.66861	-0.580763	4.12156e-05	EsaT-6 like protein EsxN_5
MMARE11_49720	0.40908	-1.28955	4.16448e-05	phosphoserine phosphatase SerB
MMARE11_12120	2.81082	1.49099	4.16955e-05	conserved hypothetical membrane protein
MMARE11_17470	0.772478	-0.372434	4.19788e-05	elongation factor Tsf
MMARE11_10870	0.657034	-0.60596	4.28653e-05	PPE family protein
MMARE11_00720	0.657185	-0.605628	4.63354e-05	single-strand binding protein Ssb
MMARE11_33850	0.212404	-2.23512	4.892e-05	ketoacyl-acyl carrier protein synthase III
MMARE11_29170	0.735207	-0.443777	5.03678e-05	ferredoxin FdxA_2
MMARE11_01390	1.6069	0.684279	5.66357e-05	conserved protein
MMARE11_36100	0.492799	-1.02093	5.89879e-05	conserved hypothetical transcriptionalregulator
MMARE11_17370	10.659	3.414	6.00994e-05	UDP-glucose 4-epimerase, GalE4
MMARE11_39210	0.285205	-1.80993	6.01404e-05	pyridoxamine 5-phosphate oxidase
MMARE11_23980	2.29441	1.19813	6.59904e-05	cytochrome P450 139A3 Cyp139A3
MMARE11_16490	0.720706	-0.472518	7.04367e-05	polyphosphate kinase Ppk
MMARE11_43620	0.791287	-0.337728	7.17901e-05	succinyl-CoA synthetase (alpha chain) SucD
MMARE11_09860	0.804838	-0.31323	7.21394e-05	50S ribosomal protein L3 RplC
MMARE11_15990	1.67575	0.744809	7.25335e-05	conserved hypothetical membrane protein
MMARE11_16930	0.509392	-0.973152	7.5896e-05	phenolpthiocerol synthesis type-I polyketidesynthase PpsD
MMARE11_33150	0.258549	-1.95149	8.66108e-05	pyruvate ferredoxin/flavodoxin oxidoreductasefamily protein
MMARE11_09890	0.759045	-0.397742	9.40919e-05	50S ribosomal protein L2, RplB
MMARE11_26340	0.764151	-0.38807	9.56462e-05	malate synthase G GlcB
MMARE11_03800	0.793323	-0.334019	0.000109827	MCE-family protein Mce1F
MMARE11_05210	2.37724	1.24928	0.000113682	conserved hypothetical protein
MMARE11_29120	2.51619	1.33124	0.000145929	conserved protein
MMARE11_51340	0.818802	-0.288414	0.000146844	19 kDa lipoprotein antigen precursor LpqH
MMARE11_01450	0.766838	-0.383006	0.000149625	isocitrate dehydrogenase [NADP] Icd2
MMARE11_22550	1.39066	0.475775	0.000156175	glycosyltransferase, WcaA
MMARE11_12370	0.679679	-0.557074	0.00015699	metal cation-transporting p-type ATPase C CtpC
MMARE11_06560	0.656808	-0.606456	0.000158145	polyketide synthase Pks6
MMARE11_36220	1.89135	0.91942	0.000162899	sulfate-transport ATP-binding protein ABCtransporter CysA1
MMARE11_14220	0.659565	-0.600413	0.000175103	acyl-CoA dehydrogenase FadE23
MMARE11_23160	0.59536	-0.748166	0.000176555	nicotinate-nucleotide pyrophosphatase NadC
MMARE11_38840	0.753327	-0.408653	0.000184026	acetyl-CoA acetyltransferase FadA4
MMARE11_23560	0.850633	-0.233391	0.000185095	ribosomal protein S1 RpsA
MMARE11_18150	0.795815	-0.329495	0.000194507	integral membrane efflux protein EfpA
MMARE11_27241	0.566961	-0.818678	0.00021206	conserved membrane protein
MMARE11_09470	0.875622	-0.191619	0.00021319	DNA-directed RNA polymerase, beta chain, RpoC
MMARE11_31040	2.64377	1.40259	0.000218735	conserved hypothetical membrane protein
MMARE11_29690	1.57682	0.65702	0.000234619	bifunctional protein: CobI-CobJ fusion protein
MMARE11_43640	0.617867	-0.694632	0.00023637	conserved hypothetical protein
MMARE11_31660	0.672595	-0.572191	0.000245212	conserved transmembrane transport protein-MmpLfamily
MMARE11_23970	1.42648	0.512458	0.000252189	chalcone synthase, Pks11_1
MMARE11_08280	2.56392	1.35835	0.000255805	conserved hypothetical membrane protein
MMARE11_21740	0.723517	-0.4669	0.000257506	glucose-6-phosphate 1-dehydrogenase Zwf2
MMARE11_36980	2.0656	1.04656	0.000258684	conserved hypothetical protein
MMARE11_33940	0.218815	-2.19221	0.000259615	phosphofructokinase, PfkB_1
MMARE11_05030	0.746018	-0.422718	0.00026398	EsaT-6 like protein EsxG
MMARE11_39040	0.760747	-0.39451	0.000279557	conserved hypothetical membrane protein
MMARE11_48620	0.594984	-0.749076	0.000308048	PPE family protein
MMARE11_05610	6.87031	2.78037	0.000313263	conserved hypothetical membrane protein
MMARE11_00730	0.680975	-0.554327	0.000314604	30S ribosomal protein S18-1 RpsR1
MMARE11_34060	2.17826	1.12318	0.000317613	PE-PGRS family protein
MMARE11_07920	0.735176	-0.443839	0.000317772	glutamyl-tRNA reductase HemA
MMARE11_21950	0.735401	-0.443397	0.000319515	acyl-CoA dehydrogenase FadE15
MMARE11_07940	0.755117	-0.405228	0.000328592	uroporphyrin-III C-methyltransferase HemD
MMARE11_06600	1.55459	0.63653	0.000328816	acetate kinase AckA
MMARE11_24450	0.550341	-0.861602	0.000342989	PPE family protein, PPE23
MMARE11_00570	1.46574	0.551631	0.000343948	short-chain type oxidoreductase
MMARE11_26510	1.28155	0.357892	0.000345724	oxidoreductase
MMARE11_29710	0.714882	-0.484222	0.000352751	conserved transmembrane transport protein,MmpL5_5
MMARE11_41460	6.20321	2.63302	0.000355158	5-methyltetrahydropteroyltriglutamate--homocysteine methyltransferase MetE
MMARE11_17500	8.00972	3.00175	0.000363161	conserved hypothetical membrane protein
MMARE11_31721	0.799448	-0.322923	0.000373517	non-ribosomal peptide synthetase
MMARE11_12710	0.409806	-1.28699	0.000381718	preprotein translocase SecA1 1 subunit
MMARE11_52770	0.516024	-0.954489	0.000395021	Esx-1 secretion associated protein EspI
MMARE11_10480	0.765424	-0.385669	0.000489109	50S ribosomal protein L17, RplQ
MMARE11_36900	0.768909	-0.379114	0.000490983	ATP-dependent CLP protease proteolytic subunit 2ClpP2
MMARE11_43730	0.495857	-1.01201	0.000516575	PE-PGRS family protein
MMARE11_53130	0.688689	-0.538076	0.00051876	conserved protein
MMARE11_40280	0.779055	-0.360202	0.000520288	alternative RNA polymerase sigma factor SigE
MMARE11_35940	3.41501	1.77189	0.000521494	alternative RNA polymerase sigma factorSigJ-like protein
MMARE11_00580	1.83831	0.878378	0.000524364	transcriptional regulatory protein
MMARE11_24980	0.25954	-1.94597	0.000570934	amino acid transporter PotE
MMARE11_49350	0.803582	-0.315483	0.000576907	membrane-bound protease FtsH
MMARE11_29480	0.853007	-0.229371	0.000579539	polyketide synthase, Pks12
MMARE11_30840	1.37295	0.457282	0.000582477	conserved hypothetical membrane protein
MMARE11_26750	1.23554	0.305143	0.000584637	alkyl hydroperoxide reductase D protein AhpD
MMARE11_11450	0.773331	-0.370842	0.000599197	O-acetylhomoserine sulfhydrylase MetC
MMARE11_40950	2.00855	1.00615	0.000600992	PE family protein
MMARE11_43630	0.830971	-0.26713	0.00066797	succinyl-CoA synthetase (beta chain) SucC
MMARE11_07300	0.639052	-0.645996	0.0006708	aldehyde dehydrogenase, PutA_1
MMARE11_09180	0.783784	-0.351472	0.00068974	conserved protein
MMARE11_30230	1.44956	0.535612	0.00069473	dihydrolipoamide dehydrogenase Lpd_1
MMARE11_22280	2.34392	1.22893	0.000704823	conserved hypothetical protein
MMARE11_50020	3.69808	1.88678	0.00070516	conserved hypothetical response regulatoryprotein
MMARE11_12610	0.802828	-0.316838	0.000713178	adenosylhomocysteinase SahH
MMARE11_06530	0.504106	-0.988201	0.000724175	conserved transmembrane transport protein MmpL1
MMARE11_14450	0.651059	-0.619141	0.000729821	ssRNA-binding protein SmpB
MMARE11_36760	1.32053	0.401113	0.000737513	nucleoside diphosphate kinase NdkA
MMARE11_26410	1.40576	0.491354	0.000766898	transcriptional regulatory protein
MMARE11_52310	0.748653	-0.41763	0.000809146	conserved hypothetical secreted protein
MMARE11_31980	0.45274	-1.14325	0.000817341	cytochrome C oxidase polypeptide I CtaD_1
MMARE11_18750	4.10028	2.03572	0.00083832	PE-PGRS family protein
MMARE11_52240	0.666424	-0.585489	0.000843479	histone-like protein Hns
MMARE11_51400	0.520896	-0.940932	0.000877984	PE-PGRS family protein
MMARE11_21970	1.23199	0.300988	0.000888904	cation transporter p-type ATPase D CtpD
MMARE11_20020	2.19002	1.13095	0.000901298	conserved hypothetical protein
MMARE11_07350	0.798924	-0.32387	0.000920848	dihydrolipoamide dehydrogenase Lpd
MMARE11_03790	0.834644	-0.260767	0.000945967	MCE-family lipoprotein LprK (MCE-familylipoprotein Mce1E)
MMARE11_29150	0.518146	-0.948569	0.000948488	GTP cyclohydrolase I FolE_1
MMARE11_18110	1.5307	0.614188	0.000949786	magnesium chelatase
MMARE11_25970	0.811417	-0.301485	0.000961483	type VII secretion EccD5
MMARE11_41800	3.4496	1.78643	0.00100666	conserved hypothetical protein
MMARE11_09350	2.69805	1.43191	0.00102345	malonyl CoA-acyl carrier protein transacylase,FabD2
MMARE11_16290	0.669629	-0.578566	0.00102559	acetolactate synthase (large subunit) IlvB1
MMARE11_31800	1.28451	0.361214	0.00104953	multimeric flavodoxin WrbA
MMARE11_29890	0.698453	-0.517764	0.00108044	conserved hypothetical protein
MMARE11_01760	0.82856	-0.271322	0.00110545	10 kDa culture filtrate antigen EsxB_1
MMARE11_44300	2.20447	1.14043	0.00111959	conserved hypothetical protein
MMARE11_27920	2.63104	1.39564	0.00118149	multidrug-transport integral membrane proteinMmr-like protein
MMARE11_25700	0.798064	-0.325424	0.00118353	conserved hypothetical protein
MMARE11_44470	1.67122	0.740899	0.00118974	conserved hypothetical penicillin bindingprotein
MMARE11_02220	2.78018	1.47518	0.00119311	transcriptional regulatory protein (possiblyTetR-family)
MMARE11_07480	0.616269	-0.698368	0.00120753	transcriptional regulatory protein
MMARE11_21410	0.814698	-0.295662	0.00123268	aminoglycosides/tetracycline-transport integralmembrane protein
MMARE11_20560	2.24066	1.16392	0.00127023	hypothetical secreted protein
MMARE11_10840	0.845316	-0.242437	0.00127502	60 kDa chaperone (GroEL1)
MMARE11_36960	0.585079	-0.773297	0.00128372	ribose/galactose isomerase RpiB
MMARE11_03720	0.818628	-0.288721	0.00129887	fatty-acid-CoA ligase FadD5
MMARE11_23450	2.16547	1.11468	0.00135238	conserved hypothetical membrane protein
MMARE11_15680	0.686457	-0.542759	0.00136788	ribonucleoside-diphosphate reductase (betachain) NrdF2
MMARE11_41790	1.5218	0.605782	0.0013872	cholesterol dehydrogenase
MMARE11_37020	0.762272	-0.391622	0.00140861	conserved hypothetical protein
MMARE11_17990	1.66444	0.735037	0.00143039	nickel cation-binding GTPase, HypB
MMARE11_27590	0.580894	-0.783654	0.00146419	immunogenic protein Mpt63
MMARE11_22620	0.868845	-0.202829	0.00152561	probable polyketide synthase Pks5
MMARE11_29500	0.788609	-0.342618	0.00153276	conserved hypothetical protein
MMARE11p_00200	1.45131	0.537359	0.00156893	putative ATPase
MMARE11_03770	0.862619	-0.213204	0.00161686	MCE-family protein Mce1C
MMARE11_23860	0.616095	-0.698776	0.00165583	glutamate N-acetyltransferase ArgJ
MMARE11_24790	4.37052	2.12781	0.00167391	ANTAR domain protein
MMARE11_09990	1.83447	0.875361	0.00180757	conserved protein
MMARE11_07250	0.720294	-0.473341	0.00181365	conserved transmembrane transport protein-MmpLfamily
MMARE11_36850	0.816396	-0.292659	0.00181788	pyruvate:ferredoxin oxidoreductase PorB, betasubunit
MMARE11_00070	0.6928	-0.52949	0.00184647	conserved hypothetical membrane protein
MMARE11_06960	1.62663	0.701885	0.00188483	tuberculin related peptide
MMARE11_13500	1.44813	0.534188	0.00190939	hypothetical protein
MMARE11_49220	0.881727	-0.181596	0.00200771	ATP-dependent protease ATP-binding subunitClpC1
MMARE11_41440	1.83654	0.876987	0.00203469	short-chain type dehydrogenase/reductase
MMARE11_39080	0.672212	-0.573013	0.00204736	peptide chain release factor 1 PrfA
MMARE11_28230	0.202764	-2.30213	0.00204802	beta-1,3-glucanase precursor
MMARE11_23550	0.750753	-0.41359	0.00206512	DNA polymerase I PolA
MMARE11_16940	0.734093	-0.445965	0.00207916	phenolpthiocerol synthesis type-I polyketidesynthase PpsC
MMARE11_25520	2.87565	1.52389	0.00212283	cytochrome P450 143A3 Cyp143A3
MMARE11_39420	1.66616	0.736527	0.00218115	bifunctional enzyme CysN/CysC: sulfateadenyltransferase (subunit 1) + adenylylsulfate kinase
MMARE11_05050	0.813879	-0.297114	0.00239564	type VII secretion EspG3
MMARE11_46360	0.858698	-0.219778	0.0024356	phytoene dehydrogenase CrtI
MMARE11_11400	1.95119	0.964355	0.00243705	Fatty acyl-AMP ligase FadD28_1 and polyketidesynthase
MMARE11_22930	1.46329	0.549219	0.0025142	acyltransferase, PlsB1
MMARE11_40660	1.45991	0.545883	0.00251452	pyrroline-5-carboxylate dehydrogenase, RocA
MMARE11_34090	0.607375	-0.71934	0.00255894	coenzyme F420-reducing hydrogenase, alphasubunit
MMARE11_09930	0.738132	-0.438049	0.00260962	50S ribosomal protein L16, RplP
MMARE11_51830	0.236168	-2.08211	0.00263069	PE-PGRS family protein
MMARE11_10650	0.827908	-0.272457	0.00263904	ribosomal protein S9, RpsI
MMARE11_49910	1.39457	0.479824	0.00268883	conserved hypothetical protein
MMARE11_21170	0.647376	-0.627324	0.00270859	aspartate carbamoyltransferase PyrB
MMARE11_40550	1.66882	0.738831	0.00272769	transcriptional regulatory protein
MMARE11_19450	1.62005	0.696036	0.00281389	conserved integral membrane alanine and leucinerich protein
MMARE11_08630	0.821148	-0.284287	0.0028778	transmembrane carbonic anhydrase, SulP
MMARE11_14800	3.57011	1.83597	0.00289131	conserved hypothetical membrane protein
MMARE11_06730	0.873869	-0.194511	0.0029517	conserved hypothetical membrane protein
MMARE11_00410	0.350025	-1.51447	0.0030423	transcriptional regulatory protein
MMARE11_29310	0.500268	-0.999228	0.00304931	PE-PGRS family protein
MMARE11_22530	1.50708	0.591752	0.00311003	conserved putative aldolase
MMARE11_49230	1.6279	0.703015	0.00314461	iron-regulated Lsr2 protein precursor
MMARE11_32320	1.33802	0.420099	0.00318183	peroxiredoxin AhpE
MMARE11_32370	0.655728	-0.60883	0.00323538	malonyl CoA-acyl carrier protein transacylaseFabD
MMARE11_23900	1.44992	0.53597	0.00325926	arginine repressor ArgR
MMARE11_42930	0.70146	-0.511567	0.00331029	resuscitation-promoting factor RpfB
MMARE11_21100	0.731165	-0.451732	0.00333712	conserved lipoprotein LprF
MMARE11_13810	0.719144	-0.475647	0.00335186	NADH dehydrogenase I (chain C) NuoC(NADH-ubiquinone oxidoreductase chain C)
MMARE11_13130	0.679809	-0.556798	0.00339798	ATP-dependent RNA helicase RhlE
MMARE11_10270	0.765218	-0.386057	0.00341706	preprotein translocase, SecY
MMARE11_36740	1.23312	0.302318	0.00352675	50S ribosomal protein L21 RplU
MMARE11_02380	1.27929	0.355345	0.00353504	conserved transmembrane transport protein,MmpL5_4
MMARE11_00960	0.696762	-0.521261	0.00355926	cellobiohydrolase a (1,4-beta-cellobiosidase a)CelA
MMARE11_52800	0.711172	-0.49173	0.0035681	conserved hypothetical protein EspE-like
MMARE11_16910	0.703088	-0.508223	0.00357906	daunorubicin-DIM-transport ATP-binding proteinABC transporter DrrA
MMARE11_31810	1.35465	0.437922	0.00365971	conserved hypothetical protein
MMARE11_21380	0.601992	-0.732184	0.00367844	Fmu protein
MMARE11_02140	1.68894	0.756121	0.00368588	dioxygenase
MMARE11_35950	1.67788	0.746642	0.00373644	low molecular weight antigen Cfp2
MMARE11_21750	0.782992	-0.35293	0.00376503	transaldolase Tal
MMARE11_16010	2.38845	1.25607	0.00379917	dehydrogenase/reductase
MMARE11_44890	6.24637	2.64302	0.00384886	molybdenum cofactor biosynthesis protein D 2MoaD2
MMARE11_04450	0.792425	-0.335653	0.00385057	acyl-CoA dehydrogenase FadE4
MMARE11_10760	0.551748	-0.857918	0.00386526	glutamate decarboxylase, GadB
MMARE11_18310	2.17857	1.12338	0.00386592	enoyl-CoA hydratase, EchA16_2
MMARE11_16380	1.47752	0.563177	0.00386975	glutamyl-tRNA synthetase GltS
MMARE11_47690	2.14295	1.0996	0.00387481	conserved hypothetical protein
MMARE11_13000	0.735379	-0.44344	0.00389431	iron-regulated short-chaindehydrogenase/reductase
MMARE11_15000	2.19857	1.13656	0.00403116	conserved hypothetical protein
MMARE11_31741	0.65088	-0.619536	0.00405988	fatty acyl-AMP ligase
MMARE11_41080	0.72557	-0.462813	0.00408509	conserved hypothetical secreted protein
MMARE11_06110	0.582761	-0.779024	0.00408574	membrane oxidoreductase
MMARE11_43140	1.28757	0.364653	0.00410263	conserved hypothetical protein
MMARE11_49950	0.773066	-0.371336	0.00422783	bifunctional membrane-associatedpenicillin-binding protein 1A/1B PonA2
MMARE11_37180	0.792502	-0.335513	0.00435821	bifunctional transmembrane phospholipidbiosynthesis enzyme PlsC
MMARE11_26610	0.689785	-0.535781	0.00436401	conserved hypothetical membrane protein
MMARE11_02770	5.96733	2.57709	0.00439273	dioxygenase
MMARE11_08120	0.353013	-1.50221	0.00441028	glycine-sarcosine methyltransferase
MMARE11_40960	1.69535	0.761584	0.00443139	conserved hypothetical membrane protein
MMARE11_39010	0.72218	-0.46957	0.0044527	ATP synthase B chain AtpF
MMARE11_37980	0.589778	-0.761756	0.00448592	regulator of sigma subunit, anti-anti-sigmafactor RsbU
MMARE11_03200	2.0324	1.02318	0.00454456	conserved protein
MMARE11_12660	1.19929	0.262178	0.00456951	two-component sensory transduction histidinekinase MtrB
MMARE11_10970	0.723587	-0.466762	0.00458465	inosine-5-monophosphate (imp) dehydrogenase,GuaB3
MMARE11_48830	0.481572	-1.05418	0.00461158	acyl-CoA dehydrogenase FadE34
MMARE11_42140	0.833743	-0.262325	0.00468824	conserved hypothetical transmembrane protein
MMARE11_11570	2.29498	1.19848	0.00481402	alternative RNA polymerase sigma factor SigJ
MMARE11_31600	0.749923	-0.415186	0.00481715	leucyl aminopeptidase PepB
MMARE11_37640	0.680153	-0.556069	0.00482442	acetylornithine deacetylase ArgE
MMARE11_05850	0.708326	-0.497515	0.00485706	L-asparagine permease AnsP1_1
MMARE11_07580	0.711767	-0.490522	0.00496388	conserved lipoprotein LprQ
MMARE11_52150	0.785059	-0.349126	0.00499446	glycerophosphoryl diester phosphodiesteraseGlpQ1
MMARE11_19080	2.53953	1.34456	0.00501944	conserved hypothetical membrane protein
MMARE11_12050	2.66548	1.4144	0.0050235	endonuclease VIII Nei
MMARE11_49170	0.667509	-0.583141	0.00504446	multifunctional geranylgeranyl pyrophosphatesynthetase IdsA1
MMARE11_52360	1.24452	0.315584	0.00509183	NADH-dependent glutamate synthase (smallsubunit) GltD
MMARE11_25040	0.677151	-0.56245	0.00515953	transcriptional accessory protein Tex
MMARE11_40630	2.1782	1.12314	0.00527145	keto acyl-CoA thiolase, Ltp2
MMARE11_40580	0.685073	-0.54567	0.00528071	conserved hypothetical protein
MMARE11_26060	0.490074	-1.02893	0.00529488	conserved hypothetical membrane protein
MMARE11_34040	0.446677	-1.1627	0.00534578	conserved hypothetical protein
MMARE11_09690	0.731372	-0.451322	0.00538655	ferredoxin reductase
MMARE11_49850	1.82575	0.868487	0.00538669	membrane-anchored thioredoxin-like protein
MMARE11_05520	1.29798	0.376265	0.00539574	haloacid dehalogenase-like hydrolase
MMARE11_49490	0.78124	-0.356162	0.00541098	D-alanyl-D-alanine carboxypeptidase DacB1
MMARE11_36700	0.42931	-1.21991	0.00551705	PE-PGRS family protein
MMARE11_00020	0.782979	-0.352954	0.00554402	DNA polymerase III (beta chain) DnaN
MMARE11_32900	1.35506	0.438354	0.00556667	conserved hypothetical carboxylase
MMARE11_52180	0.554517	-0.850696	0.00575589	superoxide dismutase [fe] SodA
MMARE11_36240	2.13129	1.09173	0.00586293	sulfate-transport integral membrane protein ABCtransporter CysT
MMARE11_51200	1.77605	0.828676	0.00588268	conserved hypothetical membrane protein
MMARE11_24200	0.321666	-1.63637	0.00589853	PE-PGRS family protein, PE_PGRS15_2
MMARE11_22540	1.26605	0.340333	0.00594987	acetolactate synthase (large subunit) IlvB1_3
MMARE11_27830	7.32694	2.87321	0.00598908	enoyl-CoA hydratase EchA13
MMARE11_23170	0.539134	-0.891283	0.0060453	conserved hypothetical protein
MMARE11_17510	3.13925	1.65042	0.0060842	conserved hypothetical membrane protein
MMARE11_09420	1.78889	0.839061	0.00612598	50S ribosomal protein L7/L12, RplL
MMARE11_16840	0.552957	-0.85476	0.0061934	fatty acyl-AMP ligase FadD28
MMARE11_39090	0.77162	-0.374037	0.0061947	50S ribosomal protein L31 RpmE
MMARE11_47210	2.17911	1.12374	0.00621972	Zn-dependent alcohol dehydrogenase, AdhX
MMARE11_10070	0.845874	-0.241485	0.00622054	50S ribosomal protein L6, RplF
MMARE11_50400	1.49201	0.577257	0.00643141	catalase KatE
MMARE11_09650	0.868427	-0.203524	0.00650254	elongation factor G, FusA1
MMARE11_37130	0.840561	-0.250575	0.00658914	ATP-binding component of an ABC transporter
MMARE11_28420	2.45614	1.29639	0.00666385	conserved hypothetical protein
MMARE11_17300	1.61361	0.690292	0.00668773	conserved alanine rich lipoprotein LppW
MMARE11_17980	1.65784	0.729304	0.0067043	nickel/iron-hydrogenase I small subunit, HyaA
MMARE11_09560	0.554133	-0.851695	0.00672912	enoyl-CoA hydratase, EchA5
MMARE11_27060	1.33921	0.421382	0.0068413	conserved secreted protein
MMARE11_26580	0.618622	-0.69287	0.00691396	alanine and proline rich secreted protein Apa
MMARE11_31320	0.774385	-0.368878	0.00700652	long-chain-fatty-acid-CoA ligase FadD15
MMARE11_49620	0.860419	-0.216888	0.00702216	cold shock protein A CspA_1
MMARE11_00610	0.344984	-1.5354	0.00713849	transcriptional regulatory protein (probablyGntR-family)
MMARE11_48700	0.566973	-0.818648	0.00717373	arylamine N-acetyltransferase Nat
MMARE11_11820	0.776964	-0.36408	0.00724085	conserved protein
MMARE11_19320	1.59873	0.676926	0.00724779	conserved hypothetical protein
MMARE11_17150	0.76979	-0.377463	0.00730432	nitrogen regulatory protein P-II GlnB
MMARE11_21320	1.67536	0.744469	0.0073473	membrane protein
MMARE11_01910	2.80123	1.48606	0.00740633	serine hydroxymethyltransferase GlyA2
MMARE11_33180	0.649841	-0.621841	0.00741806	6-phosphofructokinase PfkA_1
MMARE11_08880	0.606007	-0.722593	0.00743631	cytochrome P450 135B4 Cyp135B4
MMARE11_15890	0.625003	-0.678065	0.00749588	transferase
MMARE11_16990	0.666363	-0.585621	0.00753577	thioesterase TesA
MMARE11_26000	1.18821	0.248791	0.00754532	type VII secretion EccA5
MMARE11_20100	0.594505	-0.75024	0.0075483	PE-PGRS family protein
MMARE11_15870	2.22253	1.1522	0.00765009	hypothetical membrane protein
MMARE11_28500	1.46598	0.551863	0.00765818	conserved hypothetical secreted protein
MMARE11_50720	2.14044	1.09791	0.00770591	cutinase, Cut5
MMARE11_10640	0.85883	-0.219556	0.00779229	50S ribosomal protein L13, RplM
MMARE11_09870	0.808905	-0.305957	0.00804941	50S ribosomal protein L4, RplD
MMARE11_31410	0.791253	-0.337789	0.00805774	Rieske iron-sulfur protein QcrA
MMARE11_06410	0.426768	-1.22848	0.00809848	gamma-butyrobetaine hydroxylase, TauD_1
MMARE11_21200	0.696078	-0.52268	0.00814715	carbamoyl-phosphate synthase small chain CarA
MMARE11_05670	0.670121	-0.577507	0.00816557	PE-PGRS family protein
MMARE11_00750	1.2313	0.300187	0.00836988	replicative DNA helicase DnaB
MMARE11_49750	1.83083	0.872498	0.00837069	dipeptide-transport ATP-binding protein ABCtransporter DppD
MMARE11_40940	1.29023	0.367626	0.00842288	F420 biosynthesis protein FbiC
MMARE11_07900	0.771945	-0.373431	0.00864712	conserved transmembrane transport protein,MmpL2
MMARE11_10450	0.75051	-0.414056	0.00865104	30S ribosomal protein S11, RpsK
MMARE11_50300	0.597785	-0.742303	0.00879288	PE-PGRS family protein, PE_PGRS9_2
MMARE11_10470	0.768822	-0.379278	0.00881429	DNA-directed RNA polymerase (alpha chain), RpoA
MMARE11_36810	1.71434	0.777651	0.00892599	conserved hypothetical membrane protein
MMARE11_44690	1.87779	0.909035	0.00907836	conserved hypothetical exported protein
MMARE11_08580	0.470941	-1.08638	0.00915442	conserved protein
MMARE11_51330	0.620855	-0.687672	0.00935242	hydrolase
MMARE11_25510	2.45891	1.29802	0.0094275	conserved hypothetical membrane protein
MMARE11_31680	0.760856	-0.394305	0.00943614	conserved transmembrane transport protein-MmpLfamily
MMARE11_16760	0.420941	-1.24831	0.00950989	conserved hypothetical membrane protein
MMARE11p_00230	1.67618	0.745176	0.00953463	hypothetical protein
MMARE11_23180	0.442185	-1.17728	0.00960075	histidinol dehydrogenase HisD
MMARE11_10660	0.822128	-0.282565	0.00968618	phosphomannomutase, MrsA
MMARE11_12190	0.655728	-0.60883	0.00969895	bifunctional protein acetyl-/propionyl-coenzymeA carboxylase alpha chain AccA3
MMARE11_49600	0.466249	-1.10083	0.00970763	DNA topoisomerase I TopA
MMARE11_21230	0.696773	-0.521239	0.00975259	integration host factor MihF
MMARE11_40320	1.7112	0.775006	0.00981102	unidentified antibiotic-transport ATP-bindingprotein ABC transporter
MMARE11_47260	2.04717	1.03363	0.00982913	adenylosuccinate lyase, PurB
MMARE11_04280	1.84428	0.883061	0.00991076	long-chain-fatty-acid-CoA ligase
MMARE11_18220	0.867787	-0.204587	0.0100452	translation initiation factor IF-2 InfB
MMARE11_36880	0.882216	-0.180797	0.0100782	ATP-dependent CLP protease ATP-binding subunitClpX
MMARE11_06420	0.492146	-1.02284	0.0101597	aspartate decarboxylase, PanD_1
MMARE11_49970	0.706133	-0.501988	0.0101648	cysteine synthase CysK
MMARE11_51840	0.837173	-0.256403	0.0101778	propionyl-CoA carboxylase beta chain 4 AccD4_1
MMARE11_04620	1.58298	0.662642	0.0103462	acyl-CoA dehydrogenase FadE5
MMARE11_49160	0.641771	-0.63987	0.0104382	conserved integral membrane transport protein
MMARE11_34050	1.27524	0.350766	0.0104564	conserved hypothetical protein
MMARE11_33890	1.25739	0.330437	0.0105813	conserved hypothetical membrane protein
MMARE11_23640	1.44037	0.526435	0.0107346	conserved protein
MMARE11_04050	1.62637	0.701657	0.0107686	conserved hypothetical protein
MMARE11_40090	0.649064	-0.623568	0.0108301	[NAD] dependent malate oxidoreductase Mez_1
MMARE11_11440	0.815811	-0.293693	0.0108512	homoserine O-acetyltransferase MetA
MMARE11_46070	4.4182	2.14346	0.0109338	2-hydroxy-6-OXO-6-phenylhexa-2,4-dienoatehydrolase BphD_1
MMARE11_22870	1.71037	0.774305	0.0109839	bacterial-like globin, GlbN
MMARE11_09190	0.684105	-0.54771	0.0111365	conserved hypothetical membrane protein
MMARE11_37110	1.42143	0.507342	0.0113904	conserved hypothetical protein
MMARE11_42700	1.35947	0.443042	0.0114262	two-component transcriptional regulator TrcR
MMARE11_10130	0.773086	-0.3713	0.0114731	protease iv, Ssp
MMARE11_12180	1.41183	0.497564	0.0114939	peptide synthetase Nrp (peptide synthase)
MMARE11_22580	1.45519	0.541204	0.0115175	UDP-glucose 4-epimerase, GalE6
MMARE11_41310	0.44935	-1.15409	0.0115522	enoyl-CoA hydratase, EchA1_1
MMARE11_24860	1.69138	0.7582	0.0115752	acyltransferase, WS/DGAT/MGAT
MMARE11_02540	0.535763	-0.900333	0.0117164	Phospholipase C
MMARE11_36370	0.659943	-0.599586	0.0118366	conserved hypothetical transglutaminase-likeprotein
MMARE11_09300	0.649658	-0.622247	0.0118862	lipase/esterase LipG1
MMARE11_21450	1.29964	0.37811	0.0120831	riboflavin synthase beta chain RibH
MMARE11_24120	0.310588	-1.68693	0.0121199	antibiotic resistance ABC transporter, effluxprotein
MMARE11_34740	0.736331	-0.441573	0.0121762	aminotransferase(adenosylmethionine-8-amino-7-oxononanoate) BioA
MMARE11_49140	1.28691	0.363913	0.0123695	conserved hypothetical lipoprotein LpqF
MMARE11_32470	0.778372	-0.361468	0.012427	conserved hypothetical secreted protein
MMARE11_27420	1.16689	0.222674	0.0126605	isocitrate lyase AceAb
MMARE11_06750	0.824619	-0.2782	0.0126722	lipoprotein aminopeptidase LpqL
MMARE11_50450	0.605909	-0.722828	0.0127283	aspartate kinase Ask
MMARE11_09230	0.79515	-0.330701	0.0127515	50S ribosomal protein L1, RplA
MMARE11_08660	1.24461	0.315695	0.0127962	trypsin-like serine protease
MMARE11_30190	1.72586	0.787315	0.012866	non-ribosomal peptide synthetase
MMARE11_04680	0.813075	-0.298539	0.0129016	succinate dehydrogenase (iron-sulfur subunit),SdhA_1
MMARE11_18950	0.756914	-0.401798	0.0130441	conserved 35 kDa alanine rich protein
MMARE11_29630	2.08173	1.05778	0.0131616	short-chain dehydrogenase
MMARE11_32020	2.35996	1.23876	0.0131617	conserved hypothetical membrane protein
MMARE11_39120	0.785417	-0.34847	0.0132073	threonine synthase ThrC
MMARE11_26240	0.630818	-0.664703	0.0132387	glycine cleavage system H protein GcvH
MMARE11_05880	0.486373	-1.03986	0.0133366	chaperone protein, DnaJ
MMARE11_05980	0.526142	-0.926475	0.0133403	ketoacyl reductase
MMARE11_22950	0.751434	-0.412281	0.013356	conserved protein
MMARE11_13010	1.2812	0.357497	0.0134368	alternative RNA polymerase sigma-E factor(sigma-24) SigH (RpoE)
MMARE11_20840	1.88936	0.917896	0.0135843	conserved hypothetical protein
MMARE11_16340	0.760313	-0.395334	0.0136831	D-3-phosphoglycerate dehydrogenase SerA1
MMARE11_30270	0.416256	-1.26446	0.0137049	PE-PGRS family protein
MMARE11_41880	0.616095	-0.698776	0.0137754	fumarase Fum
MMARE11_11550	0.476536	-1.06934	0.0138456	PE-PGRS family protein, PE_PGRS9_4
MMARE11_39140	0.446444	-1.16345	0.0138672	diaminopimelate decarboxylase LysA
MMARE11_36710	1.5636	0.644874	0.0139566	glutamate 5-kinase protein ProB
MMARE11_22570	1.31444	0.394447	0.0139679	predicted pyridoxal phosphate-dependent enzyme
MMARE11_42950	0.597045	-0.744089	0.0140278	methionyl-tRNA synthetase MetS
MMARE11_26170	1.48569	0.571134	0.0140843	drug-transport transmembrane ATP-binding proteinABC transporter
MMARE11_45820	1.83023	0.872026	0.0140879	short-chain type dehydrogenase/reductase
MMARE11_45040	1.85315	0.889982	0.0142977	aminotransferase
MMARE11_32430	0.54577	-0.873635	0.0143636	glycerol-3-phosphate dehydrogenase GlpD1
MMARE11_18470	1.90223	0.927694	0.0143876	acyl-CoA dehydrogenase FadE21
MMARE11_09710	2.17859	1.1234	0.0145005	transcriptional regulator
MMARE11_50100	2.28378	1.19143	0.0146767	conserved hypothetical 13E12 repeat familyprotein
MMARE11_18160	0.76545	-0.385621	0.0148167	prolyl-tRNA synthetase ProS
MMARE11p_00600	0.517138	-0.95138	0.0149033	type VII secretion protein EccB
MMARE11_50190	4.07511	2.02684	0.014999	Fe-S-cluster-containing hydrogenase, HybA
MMARE11_43920	0.843755	-0.245103	0.0150219	periplasmic phosphate-binding lipoprotein PhoS2
MMARE11_14430	0.667071	-0.584089	0.0152083	cell division ATP-binding protein FtsE
MMARE11_27380	3.22514	1.68936	0.0152784	conserved hypothetical protein
MMARE11_27870	10.2502	3.35758	0.0153392	conserved hypothetical oxidoreducatse
MMARE11_18910	0.858531	-0.220058	0.0154256	cell division transmembrane protein FtsK
MMARE11_32050	0.705308	-0.503676	0.0154364	PE-PGRS family protein
MMARE11_21390	1.37822	0.462806	0.0154787	ribulose-phosphate 3-epimerase Rpe
MMARE11_49900	1.34251	0.42493	0.0154858	conserved protein with endoribonuclease L-PSPdomain
MMARE11_03400	0.795805	-0.329512	0.0154977	NAD(P) transhydrogenase (subunit alpha) PntAa
MMARE11_31620	0.824245	-0.278855	0.0155189	pyruvate dehydrogenase (E2 component) SucB
MMARE11_18780	0.66403	-0.59068	0.0155335	acyl-CoA dehydrogenase FadE18_1
MMARE11_15860	2.03963	1.0283	0.015747	conserved hypothetical membrane protein
MMARE11_20580	1.76127	0.816617	0.0158485	fatty-acid-CoA ligase FadD9
MMARE11_47930	0.808212	-0.307194	0.0158879	MCE-family lipoprotein LprN
MMARE11_31960	0.824875	-0.277753	0.0162427	glutamine synthetase GlnA2
MMARE11_03300	0.82184	-0.28307	0.0164904	short-chain type dehydrogenase/reductase
MMARE11_36860	0.860062	-0.217488	0.0165692	pyruvate:ferredoxin oxidoreductase, PorA, alphasubunit
MMARE11_47290	0.473579	-1.07832	0.0169508	conserved hypothetical membrane protein
MMARE11_07450	0.425624	-1.23235	0.0171704	mycolic acid synthase PcaA
MMARE11_23790	1.67295	0.742391	0.0174153	phenylalanyl-tRNA synthetase, alpha chain PheS
MMARE11_01770	0.892568	-0.163966	0.0174548	6 kDa culture filtrate antigen EsxA_1 (earlysecreted antigenic target-Esat6)
MMARE11_30850	0.870918	-0.199392	0.0174661	conserved secreted antigen Wag31
MMARE11_12320	1.46339	0.549312	0.0174849	transmembrane carbonic anhydrase, SulP_2
MMARE11_11620	0.714613	-0.484765	0.0175536	succinate dehydrogenase (flavoprotein subunit)SdhA
MMARE11_36430	2.72514	1.44633	0.0176746	conserved hypothetical membrane protein ComEA
MMARE11_50040	1.3578	0.441269	0.0176836	anti-anti-sigma regulatory factor
MMARE11_23940	1.26234	0.336104	0.0176838	polyketide synthase Pks7
MMARE11_09910	0.838184	-0.254662	0.0177317	50S ribosomal protein L22, RplV
MMARE11_34620	0.884725	-0.176699	0.0178484	PPE family protein, PPE5
MMARE11p_00040	0.55574	-0.847517	0.0178973	hypothetical protein
MMARE11_18290	1.69549	0.761702	0.0180731	ABC-type sugar transport protein, ATPasecomponent
MMARE11_24950	0.678645	-0.559271	0.0180745	serine/threonine-protein kinase transcriptionalregulatory protein PknK
MMARE11_15690	4.04888	2.01752	0.0180916	conserved hypothetical protein
MMARE11_48110	0.582653	-0.779291	0.0183432	fatty-acid-CoA ligase FadD19_1
MMARE11_07280	0.63207	-0.661843	0.0184233	enoyl-CoA hydratase EchA2
MMARE11_26980	0.712981	-0.488064	0.018584	secreted antigen 85-B FbpB
MMARE11_39510	1.55666	0.638453	0.0186754	dehydrogenase fad flavoprotein Gmcoxidoreductase
MMARE11_25280	0.711596	-0.490869	0.019006	copper methylamine oxidase precursor, MaoX
MMARE11_34510	2.50348	1.32393	0.0191214	conserved hypothetical membrane protein
MMARE11_09450	0.616095	-0.698776	0.0191514	ribonucleotide-transport ATP-binding protein ABCtransporter, Mkl
MMARE11_06160	1.26111	0.334689	0.0191599	membrane-anchored adenylyl cyclase Cya_1
MMARE11_44680	1.88699	0.916086	0.0191842	citrate synthase II CitA
MMARE11_36380	0.759115	-0.39761	0.0192564	conserved hypothetical protein
MMARE11_04110	1.25919	0.332492	0.0193076	conserved hypothetical protein
MMARE11_52700	0.5947	-0.749765	0.0196849	type VII secretion EccB1
MMARE11_11080	0.579286	-0.787651	0.0197477	GMP synthase, GuaA
MMARE11_29520	0.81806	-0.289722	0.0198876	polyprenol-monophosphomannose synthase, Ppm1A
MMARE11_00920	1.95436	0.966693	0.0200839	conserved hypothetical protein
MMARE11_32460	0.618279	-0.693669	0.0201132	conserved hypothetical protein
MMARE11_09340	1.37089	0.455116	0.020123	alpha-mannosidase
MMARE11_32450	0.56746	-0.81741	0.0202746	flavoprotein
MMARE11_36230	2.44124	1.28761	0.0203425	sulfate-transport integral membrane protein ABCtransporter CysW
MMARE11p_00730	2.24097	1.16412	0.0203595	Adenylate and Guanylate cyclase catalytic domainprotein
MMARE11_51230	0.196072	-2.35055	0.0204933	PE-PGRS family protein
MMARE11_16410	1.87544	0.907228	0.0205124	conserved transmembrane transport proteinMmpL1_1
MMARE11_32172	0.659522	-0.600507	0.0205125	PE-PGRS family protein
MMARE11_17310	0.83234	-0.264754	0.0207031	50S ribosomal protein L19 RplS
MMARE11_10300	1.9712	0.979075	0.0207773	alternative RNA polymerase sigma factor (RpoE),SigL
MMARE11_46090	2.70385	1.43501	0.0208187	dehydrogenase
MMARE11_16860	0.648966	-0.623786	0.0209277	methyltransferase
MMARE11_19460	1.59469	0.673274	0.0209712	TRK system potassium uptake protein CeoC
MMARE11_16740	1.96843	0.977048	0.0213269	glycosyl transferase
MMARE11_03820	1.40762	0.493257	0.0214388	conserved Mce associated transmembrane protein
MMARE11_13150	1.83269	0.87396	0.0214643	conserved hypothetical threonine and prolinerich protein
MMARE11_41940	0.605909	-0.722828	0.0217064	acyl-[acyl-carrier protein] desaturase DesA2
MMARE11_43610	0.300722	-1.7335	0.0217143	PE-PGRS family protein
MMARE11_22030	1.84491	0.883554	0.0218047	transcriptional regulatory protein
MMARE11_36600	0.656136	-0.607933	0.0219691	gamma-glutamyl phosphate reductase protein ProA
MMARE11_43800	2.59072	1.37335	0.0221989	conserved hypothetical oxidoreductase
MMARE11_10240	0.849216	-0.235796	0.022301	conserved protein
MMARE11_07590	0.658028	-0.60378	0.0223615	short-chain type oxidoreductase
MMARE11_38370	0.539064	-0.891473	0.0225377	acyl-CoA dehydrogenase
MMARE11_13080	0.623763	-0.68093	0.022631	acetyltransferase
MMARE11_20030	1.49506	0.5802	0.0226496	catalase
MMARE11_42830	0.740076	-0.434255	0.022721	ribose-phosphate pyrophosphokinase PrsA
MMARE11_40850	0.483623	-1.04804	0.0229814	PE-PGRS family protein
MMARE11_51140	1.47514	0.560851	0.0232407	prephenate dehydrogenase TyrA
MMARE11_31060	0.645445	-0.631633	0.0232612	conserved lipoprotein LppM
MMARE11_21980	1.52153	0.605523	0.0233094	thioredoxin TrxA
MMARE11_13170	0.773325	-0.370854	0.0234387	transcriptional regulator, TetR family
MMARE11_37090	0.663186	-0.592515	0.0234443	molybdopterin biosynthesis protein MoeY_1
MMARE11_10030	0.793195	-0.334253	0.0234713	50S ribosomal protein L24, RplX
MMARE11_42150	0.464633	-1.10584	0.0235287	enoyl-CoA hydratase EchA9
MMARE11_00770	1.55129	0.633469	0.0235763	conserved hypothetical protein
MMARE11_41110	1.42625	0.512226	0.0236637	conserved hypothetical protein
MMARE11_29510	0.808397	-0.306863	0.0237034	polyprenol-monophosphomannose synthase, Ppm1B
MMARE11_25450	1.8025	0.849996	0.0241153	conserved hypothetical protein
MMARE11_49420	1.28799	0.365125	0.0241438	EsaT-6 like protein EsxP_1
MMARE11_20170	1.30734	0.38663	0.0245102	conserved hypothetical protein
MMARE11_22630	0.617617	-0.695216	0.0246665	fatty acyl-AMP ligase FadD25
MMARE11_10090	0.590014	-0.761179	0.0247204	30S ribosomal protein S5, RpsE
MMARE11_22880	0.616095	-0.698776	0.0247534	fatty acyl-CoA reductase
MMARE11_52000	0.56006	-0.836347	0.0249548	acyltransferase
MMARE11_11920	1.71217	0.775827	0.025067	glycerol-3-phosphate dehydrogenase GlpD2
MMARE11_03310	0.764823	-0.386801	0.0252086	quinone oxidoreductase
MMARE11_46100	2.74539	1.45701	0.0252903	IS2 transposase TnpB
MMARE11_29340	2.31983	1.21402	0.025323	sugar ABC transporter
MMARE11_43490	0.739355	-0.435662	0.025433	acyl-CoA dehydrogenase FadE12
MMARE11_17410	15.1396	3.92026	0.0255281	conserved hypothetical membrane protein
MMARE11_04930	1.73314	0.793387	0.0255547	transcriptional regulatory protein (possiblyTetR-family)
MMARE11_29330	2.07722	1.05465	0.0260214	sugar-transport ATP-binding protein ABCtransporter
MMARE11_39650	0.616095	-0.698776	0.0260855	transcriptional regulatory protein EmbR
MMARE11_36720	1.71789	0.780637	0.0261782	GTP1/OBG-family GTP-binding protein Obg
MMARE11_19280	1.84605	0.88444	0.0262883	conserved hypothetical membrane protein
MMARE11_17520	2.77684	1.47344	0.026487	transcriptional regulatory protein
MMARE11_36280	0.836494	-0.257573	0.0267364	conserved hypothetical glycosyl hydrolase
MMARE11_09220	0.860146	-0.217347	0.0270322	50S ribosomal protein L11, RplK
MMARE11_16300	0.655228	-0.609931	0.0270542	acetolactate synthase (small subunit) IlvN
MMARE11_19240	0.775416	-0.366957	0.0274107	soluble pyridine nucleotide transhydrogenaseSthA
MMARE11_32190	1.50339	0.588222	0.0274423	conserved hypothetical protein
MMARE11_43420	0.740716	-0.433008	0.0278544	two-component sensor kinase MprB
MMARE11_46840	0.683724	-0.548513	0.0278683	metal cation transporter p-type ATPase, CtpV
MMARE11_06880	1.93698	0.953809	0.0280055	two-component sensor and regulator
MMARE11_17350	1.53882	0.621824	0.0280633	conserved hypothetical protein
MMARE11_31920	0.475293	-1.07311	0.0280687	PE-PGRS family protein
MMARE11_21520	0.658205	-0.60339	0.0281442	transcriptional regulatory protein WhiA
MMARE11_23520	0.801133	-0.319886	0.0282328	two-component system transcriptional regulator
MMARE11_30080	1.77973	0.83166	0.0282444	conserved protein
MMARE11_19090	2.04359	1.03111	0.0282583	conserved protein
MMARE11_09880	0.797712	-0.32606	0.0283479	50S ribosomal protein L23, RplW
MMARE11_29561	1.35448	0.43774	0.0286493	conserved hypothetical membrane protein
MMARE11_34920	4.32393	2.11234	0.0286862	hypothetical protein
MMARE11_35320	0.631335	-0.663523	0.028717	conserved hypothetical membrane protein
MMARE11_44780	4.78503	2.25853	0.0287303	conserved hypothetical transmembrane protein
MMARE11_09790	1.70157	0.766863	0.02878	transcriptional regulator (TetR family)
MMARE11_02810	1.69638	0.762463	0.0290467	conserved hypothetical protein
MMARE11_24190	0.627474	-0.672372	0.0292663	hypothetical membrane protein
MMARE11_37310	1.50426	0.589053	0.0293664	citrate (pro-3s)-lyase (beta subunit) CitE
MMARE11_40340	1.92171	0.942389	0.0294274	conserved integral membrane protein
MMARE11_51940	0.617894	-0.69457	0.0294692	UDP-galactopyranose mutase Glf
MMARE11_06550	0.717595	-0.478759	0.029627	fatty acyl-AMP ligase FadD30
MMARE11_50340	1.41	0.495691	0.029736	selenocysteine lyase, CsdB
MMARE11_45790	2.49308	1.31793	0.0297408	acyl-CoA dehydrogenase
MMARE11_16960	0.621005	-0.687323	0.0299063	phenolpthiocerol synthesis type-I polyketidesynthase PpsA
MMARE11_23470	1.53465	0.617907	0.0299569	Cytochrome transmembrane ATP-binding protein ABCtransporter CydD
MMARE11_16890	0.801891	-0.318521	0.0300425	daunorubicin-DIM-transport integral membraneprotein ABC transporter DrrC
MMARE11p_00430	1.89404	0.921465	0.03016	Transcription factor WhiB
MMARE11_52270	0.576358	-0.794962	0.0303605	transcriptional regulatory repressor protein(TetR-family) EthR
MMARE11_31610	0.78518	-0.348904	0.0305691	short-chain dehydrogenase EphD
MMARE11_09640	0.820526	-0.28538	0.0307893	30S ribosomal protein S7, RpsG
MMARE11_03990	0.77782	-0.362491	0.030951	conserved secretory protein
MMARE11_24900	0.56006	-0.836347	0.0309624	succinate-semialdehyde dehydrogenase [NADP+]dependent (SsdH) GabD2
MMARE11_12650	1.62763	0.702774	0.0311932	two-component sensory transductiontranscriptional regulatory protein MtrA
MMARE11_20310	0.778318	-0.361568	0.0312074	threonyl-tRNA synthetase ThrS
MMARE11_44520	0.547767	-0.868366	0.0313898	8-amino-7-oxononanoate synthase BioF2_1
MMARE11_48760	3.10677	1.63542	0.0315184	conserved hypothetical secreted protein
MMARE11_12150	1.34394	0.426473	0.0318073	anti-sigma factor RsbW
MMARE11_15350	0.554817	-0.849915	0.0318218	NAD-dependent epimerase/dehydratase familyprotein
MMARE11_40070	1.53358	0.616905	0.031833	short-chain type dehydrogenase/reductase
MMARE11_32510	0.668171	-0.58171	0.0319026	zinc-dependent alcohol dehydrogenase AdhE2
MMARE11_44340	1.53644	0.619594	0.0320172	conserved hypothetical membrane protein
MMARE11_39910	1.47856	0.564197	0.0322784	oxidoreductase
MMARE11_04870	1.39622	0.48153	0.0323002	acyl-CoA dehydrogenase FadE6
MMARE11_16900	0.863746	-0.211322	0.0323572	daunorubicin-DIM-transport integral membraneprotein ABC transporter DrrB
MMARE11_28800	1.54923	0.631553	0.0325155	RES domain protein
MMARE11_08270	1.48932	0.574657	0.0325884	conserved hypothetical membrane protein
MMARE11_16180	2.84823	1.51007	0.0326535	putative exporter
MMARE11_22590	1.57548	0.655796	0.0330191	conserved hypothetical membrane protein
MMARE11_26120	1.36226	0.446005	0.0330653	membrane-bound C-5 sterol desaturase Erg3
MMARE11_18010	0.694501	-0.525951	0.0330722	high-affinity nickel permease, HoxN
MMARE11_25430	1.95587	0.967808	0.0333742	conserved hypothetical protein
MMARE11_51710	0.787894	-0.343927	0.0338175	conserved hypothetical protein
MMARE11_50990	3.30694	1.7255	0.0339003	D-3-phosphoglycerate dehydrogenase SerA4
MMARE11_21900	1.52756	0.611231	0.0342521	conserved ATP-binding protein ABC transporter
MMARE11_43370	0.701536	-0.51141	0.0342595	conserved hypothetical serine rich protein
MMARE11_12810	2.73926	1.45379	0.0344503	linoleoyl-CoA desaturase, DesA3
MMARE11_18760	0.72143	-0.471068	0.0345516	short-chain type dehydrogenase/reductase
MMARE11_08600	0.52341	-0.933986	0.0346323	FAD-linked oxidoreductase
MMARE11_10080	0.812217	-0.300063	0.0346821	50S ribosomal protein L18, RplR
MMARE11_37400	1.36342	0.447232	0.0348112	conserved proline rich membrane protein
MMARE11_23880	0.70311	-0.508177	0.0349216	acetylornithine aminotransferase ArgD
MMARE11_44650	1.63679	0.710869	0.0349297	citrate synthase I GltA2
MMARE11_04700	0.713629	-0.486753	0.0349994	conserved hypothetical protein
MMARE11_27350	0.605909	-0.722828	0.0351541	oxidoreductase FadB5
MMARE11_19340	0.556842	-0.844659	0.0351904	PE-PGRS family protein
MMARE11_33840	0.708749	-0.496653	0.0357174	haloalkane dehalogenase
MMARE11_31570	2.00072	1.00052	0.0358211	branched-chain amino acid transaminase IlvE
MMARE11_09410	1.22104	0.288111	0.0359221	50S ribosomal protein L10, RplJ
MMARE11_35200	1.75846	0.814317	0.036219	conserved hypothetical secreted protein
MMARE11_13550	0.845826	-0.241567	0.0363122	non-heme haloperoxidase Hpx
MMARE11_47560	3.34029	1.73997	0.036536	conserved hypothetical protein
MMARE11_12410	0.757289	-0.401085	0.0367205	dTDP-6-deoxy-L-lyxo-4-hexulose reductase RmlD
MMARE11_06970	0.845066	-0.242865	0.0367637	periplasmic superoxide dismutase [Cu-Zn] SodC
MMARE11_19010	0.782358	-0.354099	0.0372244	recombinase A RecA
MMARE11_36910	0.767139	-0.38244	0.0374004	ATP-dependent CLP protease proteolytic subunit 1ClpP1
MMARE11_36390	0.817506	-0.290698	0.0381719	conserved hypothetical protein
MMARE11_05070	0.820871	-0.284773	0.038278	membrane-anchored mycosin MycP3
MMARE11_22560	1.66163	0.732602	0.0383577	nucleotidyltransferase
MMARE11_03930	1.26666	0.341024	0.038514	beta-glucosidase BglS
MMARE11_35900	0.77802	-0.36212	0.0386392	chaperone protein DnaJ2
MMARE11_11600	0.387549	-1.36755	0.0387917	PE-PGRS family protein
MMARE11_00640	0.699453	-0.515702	0.0387962	myo-inositol-1-phosphate synthase Ino1
MMARE11_14810	2.89029	1.53121	0.0388544	short-chain type dehydrogenase/reductase
MMARE11_03280	1.53259	0.615973	0.0388706	O-Methyltransferase
MMARE11_13920	2.3575	1.23726	0.0390218	transcriptional regulatory protein
MMARE11_21610	0.520024	-0.943351	0.039122	glyceraldehyde 3-phosphate dehydrogenase Gap
MMARE11_12510	0.642613	-0.637979	0.0391395	phosphomannomutase PmmA
MMARE11_41870	0.816035	-0.293296	0.0392648	fructose 1,6-bisphosphatase GlpX
MMARE11_22890	0.646632	-0.628983	0.0393846	ketoacyl reductase
MMARE11_47050	5.27456	2.39905	0.0394	conserved hypothetical protein
MMARE11_20860	2.60924	1.38363	0.0396046	conserved hypothetical alanine and leucine richprotein
MMARE11_21300	0.692752	-0.52959	0.0397102	lipase LipH
MMARE11_51980	0.777587	-0.362924	0.0398937	acyltransferase
MMARE11_15840	0.695649	-0.523569	0.0400109	conserved hypothetical protein
MMARE11_06580	1.21611	0.282279	0.0401177	F420-dependent glucose-6-phosphate dehydrogenaseFgd1
MMARE11_19640	1.5374	0.620493	0.04012	conserved hypothetical protein
MMARE11_12290	0.65489	-0.610675	0.0401602	phosphoribosylaminoimidazole carboxylasecatalytic subunit PurE (air carboxylase) (AirC)
MMARE11_51740	0.861534	-0.21502	0.0401742	short-chain type dehydrogenase/reductase
MMARE11_22500	1.51181	0.596277	0.0404214	conserved hypothetical sugar kinase
MMARE11_11010	1.58425	0.663799	0.04044	transcriptional regulator
MMARE11_14960	1.33603	0.417949	0.0404603	citrate lyase beta subunit, CitE_2
MMARE11_34490	0.392802	-1.34813	0.0405203	methyltransferase (methylase)
MMARE11_07640	1.49961	0.584592	0.0407872	two-component sensor histidine kinase SenX3
MMARE11p_00440	1.57008	0.650838	0.0408969	hypothetical protein
MMARE11_25810	1.48013	0.565725	0.0410507	conserved hypothetical protein
MMARE11_22370	0.784409	-0.350322	0.0412884	conserved hypothetical methyltransferase
MMARE11_39130	0.825293	-0.277021	0.0413279	homoserine dehydrogenase ThrA
MMARE11_37190	0.847347	-0.238975	0.0416145	conserved hypothetical membrane protein
MMARE11_22290	1.71733	0.780169	0.0416516	hypothetical transmembrane protein
MMARE11_23200	0.695649	-0.523569	0.0416952	imidazole glycerol-phosphate dehydratase HisB
MMARE11_49080	0.437599	-1.19232	0.0417151	carbonic anhydrase
MMARE11_51150	1.95899	0.970108	0.041778	conserved hypothetical protein
MMARE11_05940	0.447642	-1.15958	0.0418355	PE family protein
MMARE11_51360	1.55875	0.640392	0.0423134	two-component transcriptional regulatory proteinTcrX
MMARE11_04660	1.70969	0.773737	0.0426803	conserved hypothetical protein
MMARE11_17420	1.95632	0.968141	0.0427159	mycobactin utilization protein ViuB
MMARE11p_00780	2.57768	1.36607	0.0427445	Type IV secretory pathway, VirB4 components
MMARE11_46640	0.616095	-0.698776	0.0427907	acyl-[acyl-carrier protein] desaturase DesA1
MMARE11_19130	0.646587	-0.629084	0.0430052	acyl-CoA dehydrogenase FadE20
MMARE11_42900	0.85211	-0.230889	0.0430316	polyketide synthase Pks16
MMARE11_36450	0.729795	-0.454437	0.0430787	acyl-CoA dehydrogenase FadE18_2
MMARE11_05060	0.616095	-0.698776	0.043183	type VII secretion EccD3
MMARE11_29030	0.46348	-1.10942	0.0433396	20-beta-hydroxysteroid dehydrogenase FabG3_1
MMARE11_25390	1.19498	0.256988	0.0433975	putative signal-transduction protein containingcAMP-binding and CBS domains
MMARE11_50440	0.78273	-0.353412	0.043484	aspartate-semialdehyde dehydrogenase Asd
MMARE11_45260	2.6173	1.38808	0.0435078	conserved hypothetical secreted protein
MMARE11_39870	1.32523	0.406238	0.0436255	amidase AmiB2
MMARE11_11910	0.818011	-0.289808	0.0440438	dihydrolipoamide dehydrogenase LpdA
MMARE11_18530	0.908056	-0.139147	0.0441154	bifunctional protein polyribonucleotidenucleotidyltransferase GpsI
MMARE11_12820	1.46699	0.552863	0.0442121	linoleoyl-CoA desaturase, DesA3_1
MMARE11_47220	1.73988	0.79899	0.0443511	aldehyde dehydrogenase
MMARE11_02820	1.20952	0.274438	0.044469	transmembrane acyltransferase
MMARE11_04420	0.716901	-0.480154	0.0446503	PE-PGRS family protein
MMARE11_09920	0.574395	-0.799886	0.0446989	30S ribosomal protein S3, RpsC
MMARE11_52320	0.788725	-0.342406	0.0447004	immunogenic protein Mpt64
MMARE11_23230	0.698444	-0.517783	0.0447338	inositol-monophosphatase ImpA
MMARE11_18710	1.66691	0.737178	0.0447957	fatty acid-CoA ligase FadD13_1
MMARE11_36780	0.65532	-0.609729	0.0452002	folylpolyglutamate synthase protein FolC
MMARE11p_00300	2.95772	1.56449	0.0454719	hypothetical protein
MMARE11_15730	1.19107	0.252262	0.04549	phosphoserine phosphatase SerB2
MMARE11_23570	1.36941	0.453556	0.045636	dephospho-CoA kinase CoaE
MMARE11_38790	1.54833	0.630717	0.0462561	ATP-dependent helicase DinG
MMARE11_47530	0.652463	-0.616033	0.0464031	conserved membrane protein
MMARE11_45510	0.497496	-1.00724	0.046407	conserved hypothetical secreted protein
MMARE11_02940	0.873567	-0.19501	0.0465743	serine protease PepA
MMARE11_01360	0.759749	-0.396405	0.0466276	acyl-CoA dehydrogenase FadE25_2
MMARE11_09260	0.790123	-0.33985	0.0469599	methoxy mycolic acid synthase 4, MmaA4
MMARE11_31450	1.50336	0.58819	0.0472124	conserved integral membrane protein
MMARE11_32610	1.41435	0.500141	0.0472339	cytochrome P450 124A1, Cyp124A1
MMARE11_46820	0.357026	-1.4859	0.047607	conserved hypothetical protein
MMARE11_15390	2.15672	1.10884	0.0478087	Multicopper oxidase, type 1, CueO
MMARE11_38990	0.916446	-0.125878	0.0479601	ATP synthase alpha chain AtpA
MMARE11_21030	0.798496	-0.324643	0.0479978	elongation factor P Efp
MMARE11_22120	0.605909	-0.722828	0.0481407	enoyl-[acyl-carrier-protein] reductase, InhA
MMARE11_47040	1.50691	0.591595	0.0481417	dihydrolipoamide dehydrogenase, LpdB
MMARE11_35390	2.58368	1.36943	0.0484263	tryptophan halogenase
MMARE11_05020	0.874552	-0.193384	0.0486952	PPE family protein, PPE4
MMARE11_38970	0.913221	-0.130965	0.0487568	ATP synthase beta chain AtpD
MMARE11_23220	0.736439	-0.441362	0.0487735	phosphoribosylformimino-5-aminoimidazolecarboxamide ribotide isomerase HisA
MMARE11p_00110	1.43832	0.524388	0.0488427	PPE-repeat proteins
MMARE11_37170	1.16121	0.215628	0.0489979	glycerol-3-phosphate acyltransferase PlsB2
MMARE11_17220	0.604343	-0.726561	0.0490382	D-amino acid aminohydrolase
MMARE11_03660	4.78503	2.25853	0.0491288	monooxygenase
MMARE11_48140	0.56006	-0.836347	0.0493719	conserved hypothetical protein
MMARE11_40330	2.11544	1.08096	0.0495003	tetronasin-transport integral membrane proteinABC transporter

## Sheet: Proteome (S2)
Complete list of proteins of which expression is changed in M. marinum eccCb1 transposon mutant compared to its isogenic wild-type strain E11 during growth in 7H9 culture medium.
Gene ID	FoldChange	log2FoldChange	pval	Product
MMARE11_04980	0.161967	-2.62623	0.00146054	MMARE11_04980 type VII secretion EccA3 587271:589133 forward MW:66968
MMARE11_34890	0.177067	-2.49764	0.00146101	MMARE11_34890 PE-PGRS family protein 4232991:4235765 forward MW:81959
MMARE11_22930	0.178867	-2.48304	0.00146851	plsB1 acyltransferase, PlsB1 2725323:2727197 forward MW:69705
MMARE11_38800	0.1811	-2.46514	0.00152148	glgP glycogen phosphorylase GlgP' 1-phosphate 4714500:4717091 reverse MW:95746
MMARE11_00010	0.1926	-2.37632	0.00174222	dnaA Chromosomal replication initiator protein DnaA 1:1533 forward MW:56629
MMARE11_52690	0.194467	-2.36241	0.00175571	MMARE11_52690 type VII secretion protein EccA1 6278870:6280591 forward MW:62230
MMARE11_16960	0.195433	-2.35525	0.00180205	Cluster of ppsA phenolpthiocerol synthesis type-I polyketide synthase PpsA 2044330:2049138 reverse MW:169825 (MMARE11_16960)
MMARE11_50480	0.197	-2.34373	0.00184413	leuA 2-isopropylmalate synthase LeuA 6024153:6025973 forward MW:66040
MMARE11_37110	0.197533	-2.33983	0.00186779	MMARE11_37110 conserved hypothetical protein 4521614:4522030 reverse MW:15773
MMARE11_51740	0.207167	-2.27114	0.00187037	MMARE11_51740 short-chain type dehydrogenase/reductase 6161971:6162735 forward MW:27339
MMARE11_07440	0.209267	-2.25659	0.00191101	umaA mycolic acid synthase UmaA 898243:899103 forward MW:33040
MMARE11_09270	0.211533	-2.24104	0.0019393	mmaA3 methoxy mycolic acid synthase 3, MmaA3 1134010:1134891 reverse MW:33628
MMARE11_42950	0.213033	-2.23085	0.00196916	metS methionyl-tRNA synthetase MetS 5205557:5207113 forward MW:58059
MMARE11_13080	0.2147	-2.21961	0.00198361	MMARE11_13080 acetyltransferase 1576494:1576976 reverse MW:17804
MMARE11_04620	0.2167	-2.20623	0.00199458	fadE5 acyl-CoA dehydrogenase FadE5 548777:550612 reverse MW:66365
MMARE11_11620	0.217767	-2.19914	0.00200176	sdhA succinate dehydrogenase (flavoprotein subunit) SdhA 1403267:1405021 reverse MW:64303
MMARE11_50350	0.2179	-2.19826	0.00201658	MMARE11_50350 s-adenosyl-L-methionine-dependentmethyltransferas e 6006420:6007385 reverse MW:35369
MMARE11_37000	0.2187	-2.19297	0.00209873	pepN aminopeptidase N PepN 4506881:4509460 forward MW:93910
MMARE11_14230	0.219533	-2.18749	0.00211818	fadE24 acyl-CoA dehydrogenase FadE24 1702250:1703647 reverse MW:49805
MMARE11_28410	0.225167	-2.15093	0.00212492	mmaA2_1 methoxy mycolic acid synthase 2 MmaA2_1 3389660:3390523 forward MW:32901
MMARE11_15700	0.226633	-2.14157	0.00213496	adh NADP-dependent alcohol dehydrogenase Adh 1874763:1875803 reverse MW:37152
MMARE11_39870	0.227267	-2.13754	0.00213903	amiB2 amidase AmiB2 4848792:4850180 reverse MW:49156
MMARE11_43490	0.227667	-2.13501	0.00214981	fadE12 acyl-CoA dehydrogenase FadE12 5267778:5268944 forward MW:41678
MMARE11_36310	0.227667	-2.13501	0.0021692	lepA GTP-binding protein LepA 4415280:4417196 reverse MW:70638
MMARE11_11920	0.2289	-2.12721	0.00223966	glpD2 glycerol-3-phosphate dehydrogenase GlpD2 1433405:1435162 forward MW:63231
MMARE11_52670	0.2302	-2.11904	0.00229074	MMARE11_52670 Esx-1 secretion associated protein EspG1 6277429:6278268 forward MW:29739
MMARE11_26170	0.2319	-2.10843	0.00230832	MMARE11_26170 drug-transport transmembrane ATP-binding protein ABC transporter 3152964:3154883 reverse MW:71324
MMARE11_35220	0.232733	-2.10325	0.00231083	MMARE11_35220 conserved membrane protein 4268646:4270019 reverse MW:48524
MMARE11_36370	0.233	-2.1016	0.00232277	putative transglutaminase-like protein
MMARE11_24070	0.233567	-2.09809	0.00234546	MMARE11_24070 long-chain acyl-CoA synthase 2883560:2886541 forward MW:107070
MMARE11_37120	0.233867	-2.09624	0.00238665	gdh NAD-dependent glutamate dehydrogenase Gdh 4522027:4526865 reverse MW:176526
MMARE11_32350	0.234067	-2.09501	0.00242307	aceE pyruvate dehydrogenase E1 component AceE 3945487:3948276 forward MW:103388
MMARE11_51860	0.2052	-2.2849	0.00245164	fadD32 fatty acyl-AMP ligase FadD32 6191939:6193828 reverse MW:68861
MMARE11_07300	0.236167	-2.08212	0.00250258	putA_1 aldehyde dehydrogenase, PutA_1 884497:886020 forward MW:54677
MMARE11_24570	0.2363	-2.08131	0.0025168	engA GTP-binding protein, EngA 2945879:2947288 forward MW:50795
MMARE11_22560	0.236467	-2.08029	0.00257781	MMARE11_22560 nucleotidyltransferase 2667173:2667910 reverse MW:28178
MMARE11_47260	0.236657	-2.07913	0.00259463	purB adenylosuccinate lyase, PurB 5666754:5668181 reverse MW:51185
MMARE11_12710	0.2369	-2.07765	0.00262222	secA1 preprotein translocase SecA1 1 subunit 1534128:1536980 forward MW:106166
MMARE11_37130	0.237667	-2.07299	0.00267347	MMARE11_37130 ATP-binding component of an ABC transporter 4527080:4528756 reverse MW:61922
MMARE11_23800	0.2398	-2.0601	0.00267895	pheT phenylalanyl-tRNA synthetase, beta chain PheT 2829583:2832072 forward MW:88057
MMARE11_32450	0.240067	-2.05849	0.00268378	MMARE11_32450 flavoprotein 3958497:3960077 forward MW:55398
MMARE11_05080	0.2402	-2.05769	0.00278345	MMARE11_05080 type VII secretion EccE3 601051:602064 forward MW:36673
MMARE11_52000	0.241733	-2.04851	0.00283806	MMARE11_52000 acyltransferase 6209856:6210635 reverse MW:28506
MMARE11_16900	0.2419	-2.04752	0.00289303	drrB daunorubicin-DIM-transport integral membrane protein ABC transporter DrrB 2021409:2022278 reverse MW:30905
MMARE11_10710	0.246567	-2.01995	0.00290165	MMARE11_10710 conserved hypothetical transmembrane protein 1283796:1284266 reverse MW:17662
MMARE11_45020	0.2486	-2.0081	0.00294005	fadB fatty oxidation protein FadB 5436805:5438949 reverse MW:75672
MMARE11_40440	0.2513	-1.99252	0.00295618	fadD6 fatty-acid-CoA ligase FadD6 4917568:4919349 reverse MW:63763
MMARE11_35750	0.251433	-1.99175	0.00295806	glyS glycyl-tRNA synthetase GlyS 4345032:4346423 reverse MW:52657
MMARE11_16760	0.251667	-1.99041	0.00300114	MMARE11_16760 conserved hypothetical membrane protein 1990547:1991803 reverse MW:45048
MMARE11_15840	0.251767	-1.98984	0.0030204	MMARE11_15840 conserved hypothetical protein 1890358:1891341 forward MW:36239
MMARE11_05060	0.253133	-1.98203	0.00311775	MMARE11_05060 type VII secretion EccD3 598222:599640 forward MW:47855
MMARE11_51980	0.257233	-1.95885	0.00314353	MMARE11_51980 acyltransferase 6208278:6209063 reverse MW:28946
MMARE11_24150	0.2578	-1.95568	0.00317344	tyrS tyrosyl-tRNA synthase, TyrS 2891930:2893222 forward MW:46675
MMARE11_24900	0.258033	-1.95437	0.00319005	gabD2 succinate-semialdehyde dehydrogenase [NADP+] dependent (SsdH) GabD2 2981535:2983091 forward MW:55126
MMARE11_52630	0.259233	-1.94768	0.00320451	conserved hypothetical protein, whiB6
MMARE11_19010	0.2606	-1.94009	0.00321502	recA recombinase A RecA 2271421:2272461 forward MW:36893
MMARE11_41030	0.2608	-1.93898	0.00324023	typA GTP-binding translation elongation factor TypA 4989945:4991831 reverse MW:67699
MMARE11_32550	0.261233	-1.93659	0.00326352	MMARE11_32550 oxidoreductase 3968483:3969436 forward MW:33607
MMARE11_04450	0.2641	-1.92084	0.00330136	fadE4 acyl-CoA dehydrogenase FadE4 525169:526875 forward MW:63909
MMARE11_35230	0.265633	-1.91249	0.00334423	MMARE11_35230 conserved protein 4270016:4271533 reverse MW:54521
MMARE11_07420	0.266667	-1.90689	0.00336634	icl isocitrate lyase Icl 895791:897077 forward MW:47284
MMARE11_39650	0.267	-1.90509	0.00337007	transcriptional regulatory protein EmbR
MMARE11_20030	0.267	-1.90509	0.00337116	catalase
MMARE11_23820	0.268667	-1.89611	0.00338484	MMARE11_23820 PE-PGRS family protein 2834572:2836242 forward MW:54523, PE_PGRS62
MMARE11_30930	0.268833	-1.89522	0.00341622	murG UDP-N-acetylglucosamine-N-acetylmuramyl-(pentapep tide) pyrophosphoryl-undecaprenol-N-acetylglucosamine transferase MurG 3727324:3728523 reverse MW:41062
MMARE11_23910	0.2701	-1.88843	0.00345291	argG argininosuccinate synthase ArgG 2852111:2853307 forward MW:43883
MMARE11_25970	0.271367	-1.88168	0.00351218	MMARE11_25970 type VII secretion EccD5 3126653:3128164 forward MW:53516
MMARE11_37190	0.272167	-1.87744	0.00352989	MMARE11_37190 conserved hypothetical membrane protein 4535253:4536716 reverse MW:51733
MMARE11_29510	0.273067	-1.87267	0.00353235	Cluster of ppm1B polyprenol-monophosphomannose synthase, Ppm1B 3524664:3525470 reverse MW:29387 (MMARE11_29510)
MMARE11_01910	0.274433	-1.86547	0.00355614	glyA2 serine hydroxymethyltransferase GlyA2 229409:230686 reverse MW:45477
MMARE11_21740	0.275333	-1.86075	0.00359154	zwf2 glucose-6-phosphate 1-dehydrogenase Zwf2 2571331:2572884 reverse MW:57672
MMARE11_23570	0.275633	-1.85918	0.00360817	coaE dephospho-CoA kinase CoaE 2801418:2802644 forward MW:44546
MMARE11_40010	0.277033	-1.85187	0.00363262	deaD cold-shock DEAD-Box protein, DeaD 4864227:4865942 reverse MW:62612
MMARE11_32370	0.277567	-1.84909	0.00372789	fabD malonyl CoA-acyl carrier protein transacylase FabD 3949882:3950790 forward MW:31056
MMARE11_04590	0.278033	-1.84667	0.00375283	MMARE11_04590 conserved membrane protein 544764:545615 reverse MW:30614, htdX
MMARE11_31600	0.278167	-1.84598	0.00390432	pepB leucyl aminopeptidase PepB 3802226:3803785 forward MW:53490
MMARE11_26380	0.2789	-1.84218	0.00396159	guaB1 inosine-5-monophosphate dehydrogenase GuaB1 3181590:3183026 reverse MW:49824
MMARE11_15730	0.280733	-1.83273	0.0040282	serB2 phosphoserine phosphatase SerB2 1878984:1880219 forward MW:43480
MMARE11_40560	0.282767	-1.82232	0.00407	fadD36 fatty-acid-CoA synthetase, FadD36 4931852:4933270 reverse MW:49811
MMARE11_07940	0.285467	-1.80861	0.00420758	hemD uroporphyrin-III C-methyltransferase HemD 953348:955024 forward MW:58153
MMARE11_46760	0.286067	-1.80558	0.00421033	cysA2 thiosulfate sulfurtransferase, CysA2 5615742:5616584 forward MW:30899
MMARE11_00060	0.288567	-1.79302	0.00427091	gyrA DNA gyrase (subunit A) GyrA 7348:9867 forward MW:92758
MMARE11_32400	0.272267	-1.87691	0.00447673	kasB 3-oxoacyl-[acyl-carrier protein] synthase 2 KasB 3952539:3953792 forward MW:44192
MMARE11_10970	0.296767	-1.7526	0.00449703	guaB3 inosine-5-monophosphate (imp) dehydrogenase, GuaB3 1311970:1313097 forward MW:39044
MMARE11_52740	0.2985	-1.7442	0.0046674	Cluster of MMARE11_52740 PPE family protein 6286579:6287682 forward MW:37165 (MMARE11_52740), PPE68
MMARE11_04870	0.2985	-1.7442	0.00472193	fadE6 acyl-CoA dehydrogenase FadE6 576285:578471 reverse MW:78166
MMARE11_31580	0.2985	-1.7442	0.00478207	gcvT aminomethyltransferase GcvT 3799921:3801024 reverse MW:38576
MMARE11_33840	0.3003	-1.73552	0.00493852	MMARE11_33840 haloalkane dehalogenase 4114367:4115260 forward MW:32818
MMARE11_27420	0.301	-1.73216	0.00500087	aceAb isocitrate lyase AceAb 3284601:3286889 forward MW:85239
MMARE11_16860	0.302167	-1.72658	0.00511734	MMARE11_16860 methyltransferase 2011413:2012225 forward MW:30484
MMARE11_21770	0.3032	-1.72166	0.0051616	ctaB cytochrome C oxidase assembly factor CtaB 2576408:2577382 forward MW:34703
MMARE11_36380	0.3049	-1.71359	0.00516164	MMARE11_36380 conserved hypothetical protein 4423512:4424489 reverse MW:36329
MMARE11_09650	0.305433	-1.71107	0.00517695	fusA1 elongation factor G, FusA1 1182447:1184552 forward MW:76876
MMARE11_39910	0.305767	-1.7095	0.00535081	MMARE11_39910 oxidoreductase 4852273:4853409 reverse MW:41808
MMARE11_17680	0.306167	-1.70761	0.00539928	ispG 4-hydroxy-3-methylbut-2-en-1-yl diphosphate synthase, IspG 2124024:2125187 forward MW:40596
MMARE11_21400	0.3062	-1.70745	0.00544094	ribG bifunctional riboflavin biosynthesis protein RibG 2530530:2531549 forward MW:35299
MMARE11_11080	0.3087	-1.69572	0.00547718	guaA GMP synthase, GuaA 1325284:1326861 forward MW:56168
MMARE11_21950	0.310633	-1.68672	0.00552937	fadE15 acyl-CoA dehydrogenase FadE15 2598833:2600662 reverse MW:65827
MMARE11_42100	0.310667	-1.68656	0.00567024	cbs cystathionine beta-synthase Cbs 5105834:5107228 reverse MW:48602
MMARE11_34380	0.310967	-1.68517	0.00581657	htpG chaperone protein HtpG 4169839:4171785 reverse MW:72810
MMARE11_13980	0.3128	-1.67669	0.005845	fadB4 NADPH quinone oxidoreductase FadB4 1678017:1678988 reverse MW:33304
MMARE11_09470	0.313033	-1.67561	0.00592135	rpoC DNA-directed RNA polymerase, beta chain, RpoC 1161509:1165459 forward MW:146732
MMARE11_26490	0.315333	-1.66505	0.00596476	ndh NADH dehydrogenase Ndh 3191316:3192701 reverse MW:49687
MMARE11_13200	0.3172	-1.65654	0.00604976	MMARE11_13200 conserved hypothetical protein 1587879:1588733 forward MW:30952
MMARE11_51940	0.317367	-1.65578	0.00605561	glf UDP-galactopyranose mutase Glf 6203190:6204398 reverse MW:45992
MMARE11_27350	0.317833	-1.65366	0.00605592	fadB5 oxidoreductase FadB5 3280338:3281342 reverse MW:35348
MMARE11_04850	0.318367	-1.65124	0.00612528	fadD2 fatty-acid-CoA ligase FadD2 572583:574256 forward MW:60260
MMARE11_39790	0.320067	-1.64356	0.00623305	pknH_1 transmembrane serine/threonine-protein kinase H, PknH_1 4837885:4839738 forward MW:65870
MMARE11_50440	0.3207	-1.6407	0.00626205	asd aspartate-semialdehyde dehydrogenase Asd 6015350:6016408 reverse MW:36903
MMARE11_42910	0.321	-1.63935	0.00626913	ispE 4-diphosphocytidyl-2-C-methyl-D-erythritol kinase IspE 5201427:5202350 reverse MW:31626
MMARE11_22530	0.321767	-1.63591	0.00635987	MMARE11_22530 conserved putative aldolase 2663434:2664234 reverse MW:29466
MMARE11_10960	0.3243	-1.6246	0.00641272	guaB2 inosine-5-monophosphate (imp) dehydrogenase, GuaB2 1310362:1311960 forward MW:55380
MMARE11_47180	0.324367	-1.6243	0.00642753	ptrB protease II (oligopeptidase B), PtrB 5656063:5658180 reverse MW:79081
MMARE11_47880	0.3259	-1.6175	0.00644115	otsA alpha, alpha-trehalose-phosphate synthase [UDP-forming] OtsA 5735995:5737497 forward MW:56114
MMARE11_23170	0.325933	-1.61735	0.00652666	MMARE11_23170 conserved hypothetical protein 2753477:2753887 reverse MW:15115
MMARE11_22550	0.326333	-1.61558	0.0065612	wcaA glycosyltransferase, WcaA 2666220:2667176 reverse MW:35027
MMARE11_36780	0.326433	-1.61514	0.00657197	folC folylpolyglutamate synthase protein FolC 4478434:4479888 reverse MW:50562
MMARE11_19240	0.3268	-1.61352	0.00682702	sthA soluble pyridine nucleotide transhydrogenase SthA 2297035:2298450 reverse MW:50929
MMARE11_36860	0.326933	-1.61293	0.00686559	porA pyruvate:ferredoxin oxidoreductase, PorA, alpha subunit 4489071:4491032 reverse MW:69155
MMARE11_50920	0.327167	-1.6119	0.00691403	fadD15_1 long-chain-fatty-acid-CoA ligase FadD15_1 6070777:6072579 reverse MW:64391
MMARE11_11450	0.328	-1.60823	0.00693442	metC O-acetylhomoserine sulfhydrylase MetC 1379319:1380668 reverse MW:47398
MMARE11_12300	0.281667	-1.82794	0.00697436	fadE25 acyl-CoA dehydrogenase FadE25 1486442:1487611 forward MW:41495
MMARE11_09260	0.328267	-1.60706	0.00700196	mmaA4 methoxy mycolic acid synthase 4, MmaA4 1132967:1133866 reverse MW:34420
MMARE11_36850	0.330367	-1.59786	0.00704341	porB pyruvate:ferredoxin oxidoreductase PorB, beta subunit 4487931:4489022 reverse MW:38960
MMARE11_13130	0.330433	-1.59757	0.00705818	rhlE ATP-dependent RNA helicase RhlE 1580798:1582351 reverse MW:55447
MMARE11_22110	0.330733	-1.59626	0.00707364	fabG1 3-oxoacyl-[acyl-carrier protein] reductase, FabG1 2617938:2618705 forward MW:26637
MMARE11_51850	0.3312	-1.59423	0.00729784	pks13 polyketide synthase Pks13 6186568:6191916 reverse MW:191030
MMARE11_16490	0.3315	-1.59292	0.00737138	ppk polyphosphate kinase Ppk 1961556:1963772 reverse MW:82209
MMARE11_51330	0.333	-1.58641	0.00744351	hydrolase
MMARE11_47520	0.333233	-1.5854	0.00745638	phoP two-component system response phosphate regulon transcriptional regulator, PhoP 5694861:5695583 reverse MW:26668
MMARE11_22120	0.333333	-1.58496	0.00757912	inhA enoyl-[acyl-carrier-protein] reductase, InhA 2618784:2619593 forward MW:28693
MMARE11_25990	0.333333	-1.58496	0.00758753	MMARE11_25990 type VII secretion EccE5 3129881:3131092 forward MW:43961
MMARE11_43430	0.335033	-1.57762	0.00766884	mprA mycobacterial persistence regulator MprA 5259884:5260582 reverse MW:26025
MMARE11_22040	0.336	-1.57347	0.00777431	acn aconitate hydratase Acn 2608437:2611238 reverse MW:101156
MMARE11_13670	0.336667	-1.57061	0.00777522	MMARE11_13670 PPE family protein 1642842:1644740 forward MW:60967
MMARE11_16380	0.336733	-1.57032	0.00800309	gltS glutamyl-tRNA synthetase GltS 1947946:1949415 forward MW:53671
MMARE11_25960	0.337733	-1.56604	0.00802601	MMARE11_25960 type VII secretion chaperone EspG5 3125465:3126367 forward MW:32352
MMARE11_43700	0.338333	-1.56348	0.00812533	pgi glucose-6-phosphate isomerase Pgi 5293383:5295047 forward MW:60311
MMARE11_18530	0.338533	-1.56263	0.00816119	gpsI bifunctional protein polyribonucleotide nucleotidyltransferase GpsI 2221844:2224132 forward MW:80621
MMARE11_36790	0.339533	-1.55837	0.0081951	valS valyl-tRNA synthetase protein ValS 4479885:4482545 reverse MW:98256
MMARE11_28240	0.340933	-1.55244	0.00819569	MMARE11_28240 conserved hypothetical NADP-dependent oxidoreductase 3373183:3374196 reverse MW:35369
MMARE11_28540	0.346	-1.53116	0.00850037	MMARE11_28540 PE-PGRS family protein 3402557:3404218 forward MW:53368
MMARE11_17310	0.3472	-1.52616	0.00857405	rplS 50S ribosomal protein L19 RplS 2087378:2087719 forward MW:12960
MMARE11_16310	0.347267	-1.52588	0.00858681	ilvC ketol-acid reductoisomerase IlvC 1939862:1940893 forward MW:36983
MMARE11_41320	0.347467	-1.52505	0.00874746	fadA6_3 acetyl-CoA acetyltransferase FadA6_3 5021109:5022257 reverse MW:39904
MMARE11_09460	0.347833	-1.52353	0.00879545	rpoB DNA-directed RNA polymerase, beta subunit, RpoB 1157926:1161456 forward MW:129531
MMARE11_04600	0.348633	-1.52022	0.00880827	fabG4 3-oxoacyl-[acyl-carrier protein] reductase FabG4 545634:546998 reverse MW:46768
MMARE11_09190	0.349033	-1.51856	0.00884324	MMARE11_09190 conserved protein 1127462:1127962 forward MW:18692
MMARE11_23180	0.349333	-1.51732	0.00898976	hisD histidinol dehydrogenase HisD 2753972:2755315 forward MW:46287
MMARE11_16840	0.349633	-1.51609	0.00901821	fadD28 fatty acyl-AMP ligase FadD28 2009255:2010997 reverse MW:62400
MMARE11_49600	0.3505	-1.51251	0.00909212	topA DNA topoisomerase I TopA 5928142:5930946 reverse MW:102158
MMARE11_31220	0.350567	-1.51224	0.0091281	aroG 3-deoxy-D-arabino-heptulosonate 7-phosphate synthase AroG 3762994:3764382 reverse MW:50609
MMARE11_43060	0.3531	-1.50185	0.0091482	arcA arginine deiminase ArcA 5220898:5222106 reverse MW:43395
MMARE11_16340	0.353567	-1.49995	0.00915142	serA1 D-3-phosphoglycerate dehydrogenase SerA1 1943040:1944626 forward MW:54206
MMARE11_39140	0.354267	-1.49709	0.00928635	lysA diaminopimelate decarboxylase LysA 4764989:4766407 reverse MW:50468
MMARE11_12780	0.354433	-1.49641	0.00938929	pvdS transcriptional regulatory protein PvdS 1545074:1545946 forward MW:33688
MMARE11_46640	0.356	-1.49005	0.00946509	desA1 acyl-[acyl-carrier protein] desaturase DesA1 5602653:5603669 forward MW:38991
MMARE11_22880	0.357133	-1.48547	0.00949358	MMARE11_22880 fatty acyl-CoA reductase 2717370:2718386 forward MW:36335
MMARE11_00610	0.357667	-1.48331	0.009527	MMARE11_00610 transcriptional regulatory protein (probably GntR-family) 62159:62923 reverse MW:28509
MMARE11_12650	0.3586	-1.47955	0.00955151	mtrA two-component sensory transduction transcriptional regulatory protein MtrA 1527247:1527924 forward MW:24918
MMARE11_14430	0.360733	-1.471	0.00958871	ftsE cell division ATP-binding protein FtsE 1723899:1724588 forward MW:25509
MMARE11_07450	0.365	-1.45403	0.00961629	pcaA mycolic acid synthase PcaA 899335:900198 reverse MW:32751
MMARE11_18480	0.365767	-1.451	0.00972155	sirR transcriptional repressor SirR 2218253:2218945 reverse MW:25159
MMARE11_40070	0.366367	-1.44864	0.00976952	MMARE11_40070 short-chain type dehydrogenase/reductase 4877260:4878093 forward MW:29090
MMARE11_15350	0.367	-1.44615	0.00995292	UDP-glucose 4-epimerase GalE1
MMARE11_25040	0.367	-1.44615	0.010062	transcriptional accessory protein Tex
MMARE11_31610	0.367	-1.44615	0.0100729	ephD short-chain dehydrogenase EphD 3804248:3806032 reverse MW:63845
MMARE11_41940	0.367	-1.44615	0.0101552	desA2 acyl-[acyl-carrier protein] desaturase DesA2 5089373:5090200 reverse MW:31348
MMARE11_03280	0.367	-1.44615	0.0101705	MMARE11_03280 O-Methyltransferase 382342:383277 forward MW:34076
MMARE11_50610	0.367	-1.44615	0.0102145	dnaZX DNA polymerase III (subunit gamma/tau) DnaZX 6035547:6037412 reverse MW:66400
MMARE11_19130	0.3676	-1.44379	0.0102606	fadE20 acyl-CoA dehydrogenase FadE20 2285445:2286605 forward MW:43067
MMARE11_13100	0.368133	-1.4417	0.0103983	gpm2 phosphoglycerate mutase Gpm2 1578070:1579455 reverse MW:48595
MMARE11_21200	0.3688	-1.43909	0.0104243	carA carbamoyl-phosphate synthase small chain CarA 2507088:2508215 forward MW:39797
MMARE11_14560	0.3704	-1.43284	0.0104397	MMARE11_14560 conserved hypothetical protein 1737030:1737896 reverse MW:31108
MMARE11_23900	0.3716	-1.42818	0.0104671	argR arginine repressor ArgR 2851562:2852062 forward MW:16872
MMARE11_43140	0.3716	-1.42818	0.0104765	MMARE11_43140 conserved hypothetical protein 5227456:5227992 forward MW:18418
MMARE11_13800	0.372	-1.42663	0.0104907	nuoD NADH dehydrogenase I (chain D) NuoD (NADH-ubiquinone oxidoreductase chain D) 1660079:1661377 reverse MW:47503
MMARE11_29630	0.373133	-1.42224	0.0105093	MMARE11_29630 short-chain dehydrogenase 3541158:3541985 forward MW:28835
MMARE11_16770	0.373167	-1.42211	0.0105149	MMARE11_16770 ketoreductase 1992016:1993173 forward MW:41858
MMARE11_18160	0.373367	-1.42133	0.010561	proS prolyl-tRNA synthetase ProS 2184108:2185856 forward MW:63537
MMARE11_09660	0.374067	-1.41863	0.0105698	tuf iron-regulated elongation factor Ef-tu, Tuf 1184739:1185929 forward MW:43774
MMARE11_45030	0.340667	-1.55357	0.010595	fadA acyl-CoA thiolase FadA 5438954:5440207 reverse MW:43984
MMARE11_00050	0.374867	-1.41555	0.0106263	gyrB DNA gyrase (subunit B) GyrB 5230:7308 forward MW:76113
MMARE11_21760	0.375867	-1.41171	0.0108111	tkt transketolase Tkt 2574018:2576120 reverse MW:75125
MMARE11_10270	0.375933	-1.41145	0.0108178	secY preprotein translocase, SecY 1239948:1241273 forward MW:47656
MMARE11_48140	0.3775	-1.40545	0.0108232	MMARE11_48140 conserved hypothetical protein 5778361:5779071 forward MW:25669
MMARE11_37690	0.281333	-1.82965	0.0108669	fas fatty acid synthase Fas 4587456:4596674 reverse MW:326065
MMARE11_10130	0.379333	-1.39846	0.0109978	ssp protease iv, Ssp 1225422:1227224 forward MW:63667
MMARE11_10870	0.3801	-1.39555	0.0109992	MMARE11_10870 PPE family protein 1300305:1302020 reverse MW:55869
MMARE11_20860	0.3803	-1.39479	0.0110064	MMARE11_20860 conserved hypothetical alanine and leucine rich protein 2467690:2470365 reverse MW:96443
MMARE11_00640	0.3805	-1.39403	0.0110456	ino1 myo-inositol-1-phosphate synthase Ino1 64868:65986 reverse MW:40366
MMARE11_16930	0.302667	-1.7242	0.0110571	ppsD phenolpthiocerol synthesis type-I polyketide synthase PpsD 2027732:2033152 reverse MW:191722
MMARE11_31570	0.381433	-1.3905	0.011138	ilvE branched-chain amino acid transaminase IlvE 3798760:3799866 reverse MW:39809
MMARE11_14220	0.3853	-1.37595	0.0112314	fadE23 acyl-CoA dehydrogenase FadE23 1700990:1702195 reverse MW:43508
MMARE11_38840	0.387233	-1.36872	0.0112999	fadA4 acetyl-CoA acetyltransferase FadA4 4722729:4723910 reverse MW:40490
MMARE11_50450	0.387333	-1.36835	0.0113038	ask aspartate kinase Ask 6016410:6017675 reverse MW:44426
MMARE11_04150	0.3875	-1.36773	0.0113351	pckA iron-regulated phosphoenolpyruvate carboxykinase [GTP] PckA 484316:486145 forward MW:67848
MMARE11_26340	0.389267	-1.36117	0.0114545	glcB malate synthase G GlcB 3174696:3176891 reverse MW:79477
MMARE11_04680	0.3912	-1.35402	0.0115135	sdhA_1 succinate dehydrogenase (iron-sulfur subunit), SdhA_1 554338:556266 reverse MW:70474
MMARE11_23430	0.391267	-1.35378	0.0115909	pykA pyruvate kinase PykA 2782256:2783674 forward MW:50721
MMARE11_40240	0.3913	-1.35365	0.0117074	mrp Mrp-related protein Mrp 4895681:4896841 forward MW:40717
MMARE11_09920	0.393467	-1.34569	0.0117148	rpsC 30S ribosomal protein S3, RpsC 1210835:1211662 forward MW:30177
MMARE11_19640	0.3936	-1.3452	0.0117609	MMARE11_19640 conserved hypothetical protein 2338596:2339291 forward MW:26448
MMARE11_12190	0.396	-1.33643	0.0118001	accA3 bifunctional protein acetyl-/propionyl-coenzyme A carboxylase alpha chain AccA3 1476535:1478328 reverse MW:63706
MMARE11_12610	0.396233	-1.33558	0.0119171	sahH adenosylhomocysteinase SahH 1520253:1521731 forward MW:53885
MMARE11_09430	0.3984	-1.32771	0.0120171	MMARE11_09430 transcriptional regulatory protein 1153857:1154594 reverse MW:25795
MMARE11_26190	0.3986	-1.32699	0.0120451	secA2 preprotein translocase ATPase SecA2 3156670:3159090 forward MW:87910
MMARE11_22080	0.399967	-1.32205	0.0122152	moxR1 transcriptional regulatory protein, MoxR1 2614695:2615810 forward MW:40012
MMARE11_10660	0.4	-1.32193	0.0122749	phosphoglucosamine mutase
MMARE11_20840	0.4056	-1.30187	0.0124517	MMARE11_20840 conserved hypothetical protein 2465609:2466619 forward MW:36987
MMARE11_50640	0.406967	-1.29702	0.0124772	echA3_1 enoyl-CoA hydratase, EchA3_1 6040055:6040801 reverse MW:25942
MMARE11_17470	0.407733	-1.2943	0.0126704	tsf elongation factor Tsf 2101960:2102775 forward MW:28531
MMARE11_38260	0.407967	-1.29348	0.0126739	MMARE11_38260 transcriptional regulatory protein 4661212:4662015 forward MW:29489
MMARE11p_00470	0.4083	-1.2923	0.0128983	MMARE11p_00470 Flp pilus assembly protein, ATPase CpaE 87618:88322 forward MW:25598
MMARE11_12410	0.4097	-1.28736	0.0129031	rmlD dTDP-6-deoxy-L-lyxo-4-hexulose reductase RmlD 1500234:1501160 forward MW:31460
MMARE11_21520	0.410333	-1.28513	0.0130667	whiA transcriptional regulatory protein WhiA 2543041:2544018 forward MW:34864
MMARE11_36910	0.411733	-1.28022	0.0133187	clpP1 ATP-dependent CLP protease proteolytic subunit 1 ClpP1 4496961:4497557 reverse MW:21488
MMARE11_06580	0.412033	-1.27917	0.0133609	fgd1 F420-dependent glucose-6-phosphate dehydrogenase Fgd1 798925:799935 forward MW:37232
MMARE11_18220	0.412633	-1.27707	0.0133795	infB translation initiation factor IF-2 InfB 2189213:2192062 forward MW:98306
MMARE11_43750	0.4152	-1.26812	0.0133873	MMARE11_43750 PE-PGRS family protein 5299861:5301576 reverse MW:49339
MMARE11_09450	0.415567	-1.26685	0.0134521	mkl ribonucleotide-transport ATP-binding protein ABC transporter, Mkl 1156347:1157333 forward MW:35897
MMARE11_42830	0.416733	-1.2628	0.0134984	prsA ribose-phosphate pyrophosphokinase PrsA 5192192:5193172 forward MW:35475
MMARE11_38990	0.417333	-1.26073	0.0136387	atpA ATP synthase alpha chain AtpA 4749602:4751251 reverse MW:59372
MMARE11_10760	0.42	-1.25154	0.0136777	gadB glutamate decarboxylase, GadB 1289417:1290802 forward MW:51032
MMARE11_22890	0.420067	-1.25131	0.0138279	MMARE11_22890 ketoacyl reductase 2718391:2719194 forward MW:28215
MMARE11_36390	0.4206	-1.24948	0.0138832	MMARE11_36390 conserved hypothetical protein 4424489:4426153 reverse MW:61855
MMARE11_35900	0.421567	-1.24617	0.0139287	dnaJ2 chaperone protein DnaJ2 4358251:4359387 reverse MW:39993
MMARE11_03930	0.4227	-1.24229	0.0141677	bglS beta-glucosidase BglS 452489:454624 forward MW:74871
MMARE11_09860	0.425333	-1.23333	0.0142574	rplC 50S ribosomal protein L3 RplC 1207477:1208130 forward MW:23036
MMARE11_23560	0.4257	-1.23209	0.0143177	rpsA ribosomal protein S1 RpsA 2799960:2801405 forward MW:53105
MMARE11_10060	0.425967	-1.23119	0.0143488	rpsH 30S ribosomal protein S8, RpsH 1221618:1222016 forward MW:14392
MMARE11_05980	0.428667	-1.22207	0.0143581	MMARE11_05980 ketoacyl reductase 728923:729696 forward MW:26898
MMARE11_23790	0.4287	-1.22196	0.0143756	pheS phenylalanyl-tRNA synthetase, alpha chain PheS 2828540:2829583 forward MW:38196
MMARE11_52270	0.4307	-1.21524	0.0144881	ethR transcriptional regulatory repressor protein (TetR-family) EthR 6233821:6234471 forward MW:23673
MMARE11_52830	0.430767	-1.21502	0.0145239	espB Esx-1 secreted protein, EspB 6298108:6299472 reverse MW:46927
MMARE11_19350	0.430867	-1.21469	0.0146448	Cluster of sigA RNA polymerase sigma factor SigA 2306700:2308205 reverse MW:54730 (MMARE11_19350)
MMARE11_14450	0.431367	-1.21301	0.014732	smpB ssRNA-binding protein SmpB 1725485:1725991 forward MW:19037
MMARE11_12100	0.4325	-1.20923	0.0147512	MMARE11_12100 transcriptional regulatory protein (probably AsnC-family) 1461332:1461784 forward MW:16379
MMARE11_29690	0.433	-1.20756	0.0147887	bifunctional cobalamin adenosyltransferase CobI/precorrin-3B C(17)-methyltransferase CobJ
MMARE11_09220	0.433	-1.20756	0.0148078	rplK 50S ribosomal protein L11, RplK 1129613:1130041 forward MW:14960
MMARE11_10090	0.433	-1.20756	0.0148187	rpsE 30S ribosomal protein S5, RpsE 1223014:1223688 forward MW:22935
MMARE11_17420	0.433	-1.20756	0.0148406	viuB mycobactin utilization protein ViuB 2097323:2098171 forward MW:30514
MMARE11_42150	0.433	-1.20756	0.0148717	echA9 enoyl-CoA hydratase EchA9 5112140:5113177 forward MW:36144
MMARE11_12370	0.434	-1.20423	0.0148764	ctpC metal cation-transporting p-type ATPase C CtpC 1495397:1497595 reverse MW:77820
MMARE11_09560	0.434633	-1.20213	0.0149205	echA5 enoyl-CoA hydratase, EchA5 1174451:1175224 forward MW:26715
MMARE11_32510	0.434767	-1.20169	0.015049	adhE2 zinc-dependent alcohol dehydrogenase AdhE2 3964381:3965466 forward MW:37892
MMARE11_13000	0.434867	-1.20135	0.0151833	MMARE11_13000 iron-regulated short-chain dehydrogenase/reductase 1570177:1571025 reverse MW:29929
MMARE11_26510	0.435967	-1.19771	0.0151936	MMARE11_26510 oxidoreductase 3193839:3194516 reverse MW:23290
MMARE11_21900	0.4386	-1.18902	0.0152268	MMARE11_21900 conserved ATP-binding protein ABC transporter 2594296:2595078 forward MW:28026
MMARE11_12240	0.4401	-1.1841	0.0152849	accD5 propionyl-CoA carboxylase beta chain 5 AccD5 1480755:1482395 reverse MW:58940
MMARE11_22580	0.440833	-1.18169	0.0153928	galE6 UDP-glucose 4-epimerase, GalE6 2669473:2670489 forward MW:36544
MMARE11_05950	0.4412	-1.1805	0.0154018	clpB endopeptidase ATP binding protein (chain B) ClpB 724292:726838 forward MW:92748
MMARE11_22570	0.441867	-1.17832	0.0154368	MMARE11_22570 predicted pyridoxal phosphate-dependent enzyme 2668127:2669470 forward MW:49185
MMARE11_18310	0.442533	-1.17614	0.0154617	echA16_2 enoyl-CoA hydratase, EchA16_2 2200159:2200908 reverse MW:26517
MMARE11_32460	0.443433	-1.17321	0.0155324	MMARE11_32460 conserved hypothetical protein 3960074:3961036 forward MW:34146
MMARE11_07480	0.4445	-1.16974	0.0155424	MMARE11_07480 transcriptional regulatory protein 902620:903036 forward MW:15134
MMARE11_10840	0.445033	-1.16801	0.0157243	groEL1 60 kDa chaperone (GroEL1) 1296465:1298084 forward MW:55858
MMARE11_41460	0.445033	-1.16801	0.0157313	metE 5-methyltetrahydropteroyltriglutamate--homocystei ne methyltransferase MetE 5041056:5043347 forward MW:82015
MMARE11_00570	0.445267	-1.16726	0.0157954	MMARE11_00570 short-chain type oxidoreductase 58296:58961 reverse MW:23286
MMARE11_06420	0.4454	-1.16683	0.0158427	panD_1 aspartate decarboxylase, PanD_1 773950:774438 reverse MW:18290
MMARE11_16290	0.445967	-1.16499	0.0158614	ilvB1 acetolactate synthase (large subunit) IlvB1 1937454:1939310 forward MW:66049
MMARE11_16060	0.447767	-1.15918	0.0159971	fixB electron transfer flavoprotein (alpha-subunit) FixB 1912746:1913702 forward MW:31747
MMARE11_00710	0.4484	-1.15714	0.0161396	rpsF 30S ribosomal protein S6 RpsF 73090:73380 forward MW:10896
MMARE11_20310	0.448733	-1.15607	0.0161858	thrS threonyl-tRNA synthetase ThrS 2403762:2405837 forward MW:77212
MMARE11_12700	0.450533	-1.15029	0.0162385	MMARE11_12700 conserved protein 1533342:1534031 forward MW:26182
MMARE11_21390	0.450533	-1.15029	0.0163239	rpe ribulose-phosphate 3-epimerase Rpe 2529833:2530522 forward MW:24004
MMARE11_39130	0.451133	-1.14837	0.016361	thrA homoserine dehydrogenase ThrA 4763660:4764985 reverse MW:45723
MMARE11_41870	0.455167	-1.13553	0.0163709	glpX fructose 1,6-bisphosphatase GlpX 5081646:5082734 forward MW:37799
MMARE11_39100	0.400517	-1.32007	0.0163733	rho transcription termination factor Rho 4759449:4761314 reverse MW:66876
MMARE11_36600	0.455333	-1.13501	0.0164032	proA gamma-glutamyl phosphate reductase protein ProA 4448017:4449288 reverse MW:44511
MMARE11_46370	0.41155	-1.28086	0.0165049	crtB phytoene synthase, CrtB 5573644:5574603 forward MW:35453
MMARE11_09230	0.4555	-1.13448	0.0165192	rplA 50S ribosomal protein L1, RplA 1130129:1130836 forward MW:24787
MMARE11_10080	0.456267	-1.13205	0.0165775	rplR 50S ribosomal protein L18, RplR 1222569:1222976 forward MW:14593
MMARE11_31620	0.4568	-1.13037	0.0167653	sucB pyruvate dehydrogenase (E2 component) SucB 3806261:3808045 forward MW:61264
MMARE11_10070	0.4578	-1.12721	0.0168135	rplF 50S ribosomal protein L6, RplF 1222027:1222566 forward MW:19457
MMARE11_42700	0.458	-1.12658	0.0168691	trcR two-component transcriptional regulator TrcR 5176481:5177245 forward MW:28654
MMARE11_18760	0.4598	-1.12092	0.0169455	MMARE11_18760 short-chain type dehydrogenase/reductase 2247919:2248701 forward MW:26897
MMARE11_33990	0.460067	-1.12009	0.0169709	MMARE11_33990 conserved hypothetical protein 4130263:4131243 reverse MW:35237
MMARE11_09690	0.460267	-1.11946	0.0170302	MMARE11_09690 ferredoxin reductase 1187880:1189118 forward MW:43606
MMARE11_00020	0.460533	-1.11862	0.0170717	dnaN DNA polymerase III (beta chain) DnaN 2074:3282 forward MW:42313
MMARE11_37020	0.461167	-1.11664	0.0171726	MMARE11_37020 conserved hypothetical protein 4510009:4510251 reverse MW:8441
MMARE11_52680	0.4613	-1.11622	0.017212	MMARE11_52680 Esx-1 secretion associated protein EspH 6278309:6278866 forward MW:19945
MMARE11_01360	0.4636	-1.10905	0.0173665	fadE25_2 acyl-CoA dehydrogenase FadE25_2 170025:171236 reverse MW:43736
MMARE11_49490	0.463967	-1.10791	0.0174401	dacB1 D-alanyl-D-alanine carboxypeptidase DacB1 5914433:5915818 reverse MW:46874
MMARE11_37180	0.464167	-1.10729	0.0174515	plsC bifunctional transmembrane phospholipid biosynthesis enzyme PlsC 4533307:4535256 reverse MW:69245
MMARE11_36450	0.465033	-1.10459	0.0177319	fadE18_2 acyl-CoA dehydrogenase FadE18_2 4431505:4432623 forward MW:39902
MMARE11_52360	0.465533	-1.10304	0.0177566	gltD NADH-dependent glutamate synthase (small subunit) GltD 6240914:6242380 reverse MW:53159
MMARE11_38970	0.4657	-1.10253	0.0177834	atpD ATP synthase beta chain AtpD 4747189:4748640 reverse MW:52687
MMARE11_41570	0.4657	-1.10253	0.0179153	gnd2 6-phosphogluconate dehydrogenase, decarboxylating Gnd2 5052843:5053865 reverse MW:36181
MMARE11_29030	0.4657	-1.10253	0.0180402	fabG3_1 20-beta-hydroxysteroid dehydrogenase FabG3_1 3466988:3467770 forward MW:27101
MMARE11_31810	0.466767	-1.09923	0.018061	MMARE11_31810 conserved hypothetical protein 3875121:3875960 forward MW:29828
MMARE11_05050	0.467	-1.09851	0.0180747	hypothetical protein
MMARE11_33180	0.467	-1.09851	0.0180749	6-phosphofructokinase
MMARE11_47220	0.467	-1.09851	0.0180749	MMARE11_47220 aldehyde dehydrogenase 5660858:5662381 reverse MW:54903
MMARE11_52640	0.417	-1.26188	0.0181963	MMARE11_52640 conserved hypothetical regulatory protein 6274415:6275527 forward MW:39220
MMARE11_02810	0.467	-1.09851	0.0182161	MMARE11_02810 conserved hypothetical protein 332231:333451 forward MW:43206
MMARE11_01450	0.467	-1.09851	0.0182704	icd2 isocitrate dehydrogenase [NADP] Icd2 179233:181470 reverse MW:82351
MMARE11_43620	0.467	-1.09851	0.0182787	sucD succinyl-CoA synthetase (alpha chain) SucD 5283115:5284017 reverse MW:30781
MMARE11_33890	0.467	-1.09851	0.0183026	MMARE11_33890 conserved hypothetical membrane protein 4119946:4120842 reverse MW:31780
MMARE11_32390	0.411	-1.28279	0.0183383	kasA 3-oxoacyl-[acyl-carrier protein] synthase 1 KasA 3951207:3952457 forward MW:43619
MMARE11_18150	0.467	-1.09851	0.0183426	efpA integral membrane efflux protein EfpA 2182410:2184002 forward MW:55510
MMARE11_43630	0.467	-1.09851	0.0183634	sucC succinyl-CoA synthetase (beta chain) SucC 5284032:5285195 reverse MW:40820
MMARE11_16810	0.427	-1.22769	0.0185414	Cluster of pks15/1 polyketide synthase Pks15/1 1998757:2005071 forward MW:217767 (MMARE11_16810)
MMARE11_16920	0.417	-1.26188	0.0186448	ppsE phenolpthiocerol synthesis type-I polyketide synthase PpsE 2023281:2027726 reverse MW:157950
MMARE11_52810	0.467	-1.09851	0.0187065	MMARE11_52810 Esx-1 secretion associated protein EspK 6294977:6297316 reverse MW:79476
MMARE11_15890	0.467	-1.09851	0.0187367	MMARE11_15890 transferase 1895204:1895941 forward MW:27495
MMARE11_36740	0.467	-1.09851	0.0188515	rplU 50S ribosomal protein L21 RplU 4473622:4473933 reverse MW:11001
MMARE11_13810	0.467	-1.09851	0.0188677	nuoC NADH dehydrogenase I (chain C) NuoC (NADH-ubiquinone oxidoreductase chain C) 1661397:1662113 reverse MW:26987
MMARE11_32410	0.4157	-1.26639	0.0188838	accD6 acetyl/propionyl-CoA carboxylase (beta subunit) AccD6 3953830:3955251 forward MW:50076
MMARE11_51840	0.467	-1.09851	0.0190798	accD4_1 propionyl-CoA carboxylase beta chain 4 AccD4_1 6184988:6186568 reverse MW:56882
MMARE11_49880	0.467	-1.09851	0.0192203	MMARE11_49880 conserved regulatory protein 5957018:5957692 forward MW:24687
MMARE11_29160	0.467067	-1.0983	0.0192674	MMARE11_29160 conserved membrane protein 3479425:3480312 reverse MW:31226
MMARE11_31960	0.467067	-1.0983	0.0194778	glnA2 glutamine synthetase GlnA2 3894846:3896186 reverse MW:49745
MMARE11_36880	0.468967	-1.09244	0.0195726	clpX ATP-dependent CLP protease ATP-binding subunit ClpX 4492686:4493966 reverse MW:46829
MMARE11_09180	0.468967	-1.09244	0.0196429	MMARE11_09180 conserved protein 1127022:1127450 forward MW:15003
MMARE11_36980	0.468967	-1.09244	0.0196572	MMARE11_36980 conserved hypothetical protein 4504163:4504786 reverse MW:22764
MMARE11_35710	0.468967	-1.09244	0.0196616	PPE family protein
MMARE11_40580	0.470133	-1.08886	0.0196781	MMARE11_40580 conserved hypothetical protein 4934143:4935051 reverse MW:32410
MMARE11_14340	0.470133	-1.08886	0.01968	MMARE11_14340 conserved protein 1714961:1715389 reverse MW:15824
MMARE11_12150	0.470133	-1.08886	0.019794	rsbW anti-sigma factor RsbW 1464480:1464998 forward MW:18495
MMARE11_16050	0.401333	-1.31713	0.0198148	fixA electron transfer flavoprotein (beta-subunit) FixA 1911907:1912698 forward MW:27776
MMARE11_07590	0.470833	-1.08671	0.0198309	MMARE11_07590 short-chain type oxidoreductase 917147:917899 reverse MW:26067
MMARE11_19460	0.470833	-1.08671	0.0199132	ceoC TRK system potassium uptake protein CeoC 2315312:2315974 reverse MW:23734
MMARE11_05860	0.408333	-1.29218	0.0199958	dnaK chaperone protein DnaK 695250:697118 forward MW:66381
MMARE11_52700	0.470833	-1.08671	0.0200615	Cluster of MMARE11_52700 type VII secretion EccB1 6280595:6282040 forward MW:51287 (MMARE11_52700)
MMARE11_07790	0.471833	-1.08365	0.0201496	MMARE11_07790 conserved protein 935932:936999 forward MW:38763
MMARE11_42130	0.422	-1.24469	0.0203264	fadA3 beta-ketoacyl CoA thiolase FadA3 5109637:5110869 forward MW:42913
MMARE11_34050	0.4724	-1.08192	0.020413	MMARE11_34050 conserved hypothetical protein 4136944:4137363 forward MW:15462
MMARE11_11820	0.4724	-1.08192	0.0204627	MMARE11_11820 conserved protein 1422397:1423722 reverse MW:48460
MMARE11_09930	0.4724	-1.08192	0.0204963	rplP 50S ribosomal protein L16, RplP 1211666:1212082 forward MW:15706
MMARE11_09870	0.4724	-1.08192	0.0205644	rplD 50S ribosomal protein L4, RplD 1208130:1208804 forward MW:23832
MMARE11_44650	0.4724	-1.08192	0.0206403	gltA2 citrate synthase I GltA2 5399444:5400739 reverse MW:48186
MMARE11_36900	0.473267	-1.07927	0.0206432	clpP2 ATP-dependent CLP protease proteolytic subunit 2 ClpP2 4496329:4496964 reverse MW:23229
MMARE11_21030	0.473267	-1.07927	0.0206974	efp elongation factor P Efp 2489062:2489625 forward MW:20364
MMARE11_21610	0.473267	-1.07927	0.0210056	gap glyceraldehyde 3-phosphate dehydrogenase Gap 2555705:2556724 forward MW:35967
MMARE11_07580	0.473267	-1.07927	0.0210625	lprQ conserved lipoprotein LprQ 915775:917163 forward MW:49329
MMARE11_09880	0.4734	-1.07887	0.0210983	rplW 50S ribosomal protein L23, RplW 1208804:1209106 forward MW:10952
MMARE11_09990	0.474867	-1.07441	0.0211801	MMARE11_09990 conserved protein 1217181:1217885 forward MW:23972
MMARE11_49030	0.474867	-1.07441	0.0212228	MMARE11_49030 carbonic anhydrase 5867913:5868539 reverse MW:21741
MMARE11_51890	0.474867	-1.07441	0.0214846	fbpA secreted antigen 85-A FbpA 6196476:6197489 reverse MW:35643
MMARE11_22370	0.475733	-1.07177	0.0216368	MMARE11_22370 conserved hypothetical methyltransferase 2646682:2647554 forward MW:32281
MMARE11_01750	0.475733	-1.07177	0.021642	MMARE11_01750 PPE family protein 212503:213609 forward MW:36548
MMARE11_35721	0.432733	-1.20845	0.0216467	MMARE11_35721 PPE family protein 4338932:4340095 reverse MW:37104
MMARE11_52650	0.405733	-1.3014	0.0218127	MMARE11_52650 Esx-1 secretion associated protein EspE 6275762:6277018 forward MW:43692
MMARE11_03400	0.4759	-1.07127	0.0218863	pntAa NAD(P) transhydrogenase (subunit alpha) PntAa 398320:399408 forward MW:37267
MMARE11_03820	0.4759	-1.07127	0.0218933	MMARE11_03820 conserved Mce associated transmembrane protein 441869:442858 forward MW:36308
MMARE11_09910	0.4759	-1.07127	0.0220102	rplV 50S ribosomal protein L22, RplV 1210278:1210835 forward MW:19464
MMARE11_14960	0.477133	-1.06754	0.0222232	citE_2 citrate lyase beta subunit, CitE_2 1781614:1782549 forward MW:33404
MMARE11_04610	0.417713	-1.25941	0.0222493	fadA2 acetyl-CoA acyltransferase FadA2 547168:548493 forward MW:46419
MMARE11_23860	0.4775	-1.06643	0.022269	argJ glutamate N-acetyltransferase ArgJ 2847363:2848577 forward MW:41295
MMARE11_29520	0.4775	-1.06643	0.0225951	ppm1A polyprenol-monophosphomannose synthase, Ppm1A 3525496:3527592 reverse MW:74263
MMARE11_44680	0.4775	-1.06643	0.0226855	citA citrate synthase II CitA 5403590:5404711 forward MW:40143
MMARE11_03300	0.478633	-1.06301	0.0229099	MMARE11_03300 short-chain type dehydrogenase/reductase 384984:385844 forward MW:29785
MMARE11_21170	0.480033	-1.05879	0.0229718	pyrB aspartate carbamoyltransferase PyrB 2504322:2505284 forward MW:33882
MMARE11_09640	0.480033	-1.05879	0.0229793	rpsG 30S ribosomal protein S7, RpsG 1181896:1182366 forward MW:17600
MMARE11_36110	0.4005	-1.32013	0.0230646	desA1_1 acyl-[acyl-carrier protein] desaturase DesA1_1 4391481:4392497 reverse MW:39151
MMARE11_49940	0.4805	-1.05739	0.0232619	whiB4 transcriptional regulatory protein Whib-like WhiB4 5961544:5961894 reverse MW:12983
MMARE11_10650	0.482133	-1.0525	0.0235538	rpsI ribosomal protein S9, RpsI 1278099:1278557 forward MW:16904
MMARE11_31410	0.482133	-1.0525	0.0236353	qcrA Rieske iron-sulfur protein QcrA 3781370:3782554 forward MW:43115
MMARE11_12510	0.482133	-1.0525	0.0238989	pmmA phosphomannomutase PmmA 1509685:1511085 forward MW:48944
MMARE11_41880	0.482267	-1.0521	0.0239832	fum fumarase Fum 5082772:5084202 forward MW:50192
MMARE11_01390	0.4823	-1.052	0.0240007	MMARE11_01390 conserved protein 173319:173885 reverse MW:21608
MMARE11_27590	0.4823	-1.052	0.0240107	MMARE11_27590 immunogenic protein Mpt63 3309890:3310369 reverse MW:16435
MMARE11_51150	0.482733	-1.0507	0.0240521	MMARE11_51150 conserved hypothetical protein 6094910:6095509 reverse MW:22039
MMARE11_09210	0.482733	-1.0507	0.0242904	nusG transcription antitermination protein, NusG 1128853:1129566 forward MW:25557
MMARE11_13170	0.484033	-1.04682	0.0243844	MMARE11_13170 transcriptional regulator, TetR family 1584565:1585248 reverse MW:25044
MMARE11_05690	0.484133	-1.04652	0.0244173	MMARE11_05690 iron-sulphur-binding reductase 671701:674649 reverse MW:104116
MMARE11_16300	0.484133	-1.04652	0.024444	ilvN acetolactate synthase (small subunit) IlvN 1939310:1939819 forward MW:18285
MMARE11_16990	0.4843	-1.04603	0.0245308	tesA thioesterase TesA 2051568:2052317 reverse MW:27569
MMARE11_00960	0.4843	-1.04603	0.02461	celA cellobiohydrolase a (1,4-beta-cellobiosidase a) CelA 126613:127665 forward MW:36361
MMARE11_37640	0.484367	-1.04583	0.0247134	argE acetylornithine deacetylase ArgE 4581874:4583199 reverse MW:45998
MMARE11_21750	0.484367	-1.04583	0.0248414	tal transaldolase Tal 2572881:2574002 reverse MW:40147
MMARE11_10640	0.484367	-1.04583	0.0250394	rplM 50S ribosomal protein L13, RplM 1277659:1278102 forward MW:16217
MMARE11_05700	0.485033	-1.04384	0.0250446	iron-sulfur-binding reductase
MMARE11_39080	0.485033	-1.04384	0.0252236	prfA peptide chain release factor 1 PrfA 4757851:4758924 reverse MW:39020
MMARE11_31400	0.350333	-1.5132	0.0252404	qcrC ubiquinol-cytochrome C reductase QcrC 3780468:3781373 forward MW:31510
MMARE11_16910	0.485333	-1.04295	0.0254346	drrA daunorubicin-DIM-transport ATP-binding protein ABC transporter DrrA 2022275:2023270 reverse MW:35805
MMARE11_23220	0.485333	-1.04295	0.0256872	hisA phosphoribosylformimino-5-aminoimidazole carboxamide ribotide isomerase HisA 2757715:2758464 forward MW:26044
MMARE11_35610	0.485333	-1.04295	0.0258463	Cluster of esxN_3 EsaT-6 like protein EsxN_3 4329676:4329960 reverse MW:9939 (MMARE11_35610)
MMARE11_17350	0.4859	-1.04127	0.025916	MMARE11_17350 conserved hypothetical protein 2089847:2090632 reverse MW:27621
MMARE11_05070	0.4859	-1.04127	0.0259582	mycP3 membrane-anchored mycosin MycP3 599637:601061 forward MW:47413
MMARE11_10460	0.486933	-1.0382	0.0259708	rpsD 30S ribosomal protein S4, RpsD 1255728:1256333 forward MW:23408
MMARE11_29480	0.486933	-1.0382	0.0263235	pks12 polyketide synthase, Pks12 3510898:3523461 reverse MW:434264
MMARE11_16890	0.486967	-1.03811	0.0263319	drrC daunorubicin-DIM-transport integral membrane protein ABC transporter DrrC 2020582:2021403 reverse MW:29708
MMARE11_17460	0.489567	-1.03042	0.0263795	rpsB 30S ribosomal protein S2 RpsB 2101128:2101958 forward MW:29995
MMARE11_48620	0.489567	-1.03042	0.0267011	MMARE11_48620 PPE family protein 5827739:5829352 forward MW:52657
MMARE11_39000	0.4897	-1.03003	0.0271072	atpH ATP synthase delta chain AtpH 4751313:4752650 reverse MW:47913
MMARE11_12480	0.4897	-1.03003	0.0271585	whiB2 transcriptional regulatory protein Whib-like WhiB2 1508047:1508430 forward MW:14075
MMARE11_49350	0.490067	-1.02895	0.0273104	ftsH membrane-bound protease FtsH 5899929:5902169 reverse MW:80478
MMARE11_46400	0.490067	-1.02895	0.0275102	mmpL13_1 conserved transmembrane transport protein MmpL13_1 5575288:5577597 forward MW:81274
MMARE11_26750	0.490433	-1.02787	0.0275431	ahpD alkyl hydroperoxide reductase D protein AhpD 3221906:3222442 reverse MW:18647
MMARE11_51880	0.490433	-1.02787	0.0275472	fbpD secreted Mpt51/Mpb51 antigen protein FbpD 6195395:6196300 reverse MW:30922
MMARE11_10470	0.490833	-1.02669	0.0276022	rpoA DNA-directed RNA polymerase (alpha chain), RpoA 1256419:1257462 forward MW:37741
MMARE11_31320	0.490833	-1.02669	0.0276334	fadD15 long-chain-fatty-acid-CoA ligase FadD15 3770768:3772570 forward MW:64572
MMARE11_52660	0.4912	-1.02562	0.0276517	MMARE11_52660 Esx-1 secretion associated protein EspF 6277116:6277427 forward MW:10626
MMARE11_15680	0.491233	-1.02552	0.0277926	nrdF2 ribonucleoside-diphosphate reductase (beta chain) NrdF2 1873290:1874264 forward MW:36877
MMARE11_28350	0.4313	-1.21324	0.0278076	katG catalase-peroxidase-peroxynitritase T KatG 3383170:3385401 reverse MW:81057
MMARE11_37310	0.492833	-1.02083	0.0280548	citE citrate (pro-3s)-lyase (beta subunit) CitE 4548153:4548974 reverse MW:28988
MMARE11_35670	0.492833	-1.02083	0.02808	esxN_4 EsaT-6 like protein EsxN_4 4336141:4336425 reverse MW:9851
MMARE11_07280	0.493267	-1.01956	0.0281266	echA2 enoyl-CoA hydratase EchA2 881329:882243 reverse MW:33095
MMARE11_24450	0.493267	-1.01956	0.0281495	MMARE11_24450 PPE family protein, PPE23 2928153:2929466 reverse MW:43787
MMARE11_49220	0.494633	-1.01557	0.0282127	clpC1 ATP-dependent protease ATP-binding subunit ClpC1 5887399:5889945 reverse MW:93735
MMARE11_31800	0.494833	-1.01499	0.0282603	wrbA multimeric flavodoxin WrbA 3874336:3875088 forward MW:27443
MMARE11_00720	0.494833	-1.01499	0.0283508	ssb single-strand binding protein Ssb 73472:73999 forward MW:17855
MMARE11_16870	0.415567	-1.26685	0.0283549	mas multifunctional mycocerosic acid synthase membrane-associated Mas 2012806:2019105 forward MW:222895
MMARE11_23710	0.425567	-1.23254	0.0284387	infC initiation factor IF-3 InfC 2822035:2822538 forward MW:18879
MMARE11_52770	0.340712	-1.55337	0.0285447	MMARE11_52770 Esx-1 secretion associated protein EspI 6288516:6291194 forward MW:93154
MMARE11_34740	0.498767	-1.00356	0.0287034	MMARE11_34740 aminotransferase (adenosylmethionine-8-amino-7-oxononanoate) BioA 4220465:4221820 forward MW:49063
MMARE11_09890	0.498767	-1.00356	0.0287162	rplB 50S ribosomal protein L2, RplB 1209136:1209978 forward MW:30442
MMARE11_10240	0.8266	-0.274739	0.0290802	MMARE11_10240 conserved protein 1237085:1237750 forward MW:23740
MMARE11_28230	0.9	-0.152003	0.0290818	beta-1,3-glucanase
MMARE11_11010	2	1	0.0291252	MMARE11_11010 transcriptional regulator 1318018:1318527 forward MW:18499
MMARE11_35690	2.00763	1.0055	0.0293184	EsaT-6 like protein EsxP_3
MMARE11_20170	2.00763	1.0055	0.029377	MMARE11_20170 conserved hypothetical protein 2392224:2392958 forward MW:27135
MMARE11_53130	2.00763	1.0055	0.0294453	MMARE11_53130 conserved protein 6333137:6333685 reverse MW:19822
MMARE11_06960	2.0113	1.00813	0.0297415	MMARE11_06960 tuberculin related peptide 843963:844445 forward MW:16680
MMARE11_52790	2.01543	1.01109	0.0297457	MMARE11_52790 Esx-1 secretion associated protein EspJ 6292853:6293680 forward MW:26278
MMARE11_21450	2.01543	1.01109	0.02993	ribH riboflavin synthase beta chain RibH 2535954:2536436 forward MW:16382
MMARE11_47930	2.01543	1.01109	0.0299737	lprN MCE-family lipoprotein LprN 5741169:5742320 reverse MW:40874
MMARE11_20130	2.01543	1.01109	0.0299823	MMARE11_20130 conserved hypothetical protein 2386216:2387340 reverse MW:40568
MMARE11_32320	2.0163	1.01171	0.0300795	ahpE peroxiredoxin AhpE 3943736:3944197 reverse MW:16749
MMARE11_06970	2.0163	1.01171	0.030339	sodC periplasmic superoxide dismutase [Cu-Zn] SodC 844518:845234 forward MW:23616
MMARE11_09420	2.0163	1.01171	0.0305871	rplL 50S ribosomal protein L7/L12, RplL 1153401:1153793 forward MW:13428
MMARE11_51200	2.0235	1.01685	0.0309478	MMARE11_51200 conserved hypothetical membrane protein 6099118:6099495 forward MW:12938
MMARE11_47920	2.0267	1.01913	0.0311163	mce4F MCE-family protein Mce4F 5739475:5741157 reverse MW:59022
MMARE11_31000	2.0267	1.01913	0.0312444	pbpB penicillin-binding membrane protein PbpB 3738300:3740375 reverse MW:74151
MMARE11_03200	2.0267	1.01913	0.0313518	MMARE11_03200 conserved protein 375299:375679 forward MW:13692
MMARE11_01770	2.029	1.02077	0.0314094	esxA_1 6 kDa culture filtrate antigen EsxA_1 (early secreted antigenic target-Esat6) 214052:214339 forward MW:9871
MMARE11_27241	2.029	1.02077	0.0314864	MMARE11_27241 conserved membrane protein 3269863:3270360 reverse MW:16646
MMARE11_52180	2.033	1.02361	0.0315605	sodA superoxide dismutase [fe] SodA 6226887:6227510 forward MW:23192
MMARE11_13010	2.033	1.02361	0.031623	sigH alternative RNA polymerase sigma-E factor (sigma-24) SigH (RpoE) 1571225:1571992 forward MW:28392
MMARE11_43920	2.033	1.02361	0.0317187	phoS2 periplasmic phosphate-binding lipoprotein PhoS2 5322642:5323754 reverse MW:37516
MMARE11_04700	2.033	1.02361	0.0317459	MMARE11_04700 conserved hypothetical protein 557213:557509 reverse MW:11121
MMARE11_22030	2.033	1.02361	0.0319366	MMARE11_22030 transcriptional regulatory protein 2607864:2608427 reverse MW:21418
MMARE11_23640	2.03573	1.02555	0.0319501	MMARE11_23640 conserved protein 2810304:2810696 forward MW:14369
MMARE11p_00040	2.04973	1.03544	0.0319663	MMARE11p_00040 hypothetical protein 19601:19798 reverse MW:6950
MMARE11_49620	2.0539	1.03837	0.0319942	cspA_1 cold shock protein A CspA_1 5931873:5932076 reverse MW:7342
MMARE11_10040	2.0539	1.03837	0.0320202	rplE 50S ribosomal protein L5, RplE 1220779:1221351 forward MW:21304
MMARE11_46820	2.0539	1.03837	0.0320954	MMARE11_46820 conserved hypothetical protein 5621490:5621843 forward MW:12693
MMARE11_39120	2.0539	1.03837	0.0322332	thrC threonine synthase ThrC 4762581:4763663 reverse MW:37331
MMARE11_03990	2.0539	1.03837	0.0324662	MMARE11_03990 conserved secretory protein 462194:463219 forward MW:35833
MMARE11_07930	2.05497	1.03911	0.0324989	hemC porphobilinogen deaminase HemC 952382:953326 forward MW:32561
MMARE11_04110	2.05497	1.03911	0.0325717	MMARE11_04110 conserved hypothetical protein 479677:480414 reverse MW:26409
MMARE11_43640	2.05497	1.03911	0.0329182	MMARE11_43640 conserved hypothetical protein 5285471:5286538 forward MW:37794
MMARE11_52320	2.05497	1.03911	0.0329592	mpt64 immunogenic protein Mpt64 6237805:6238497 forward MW:25321
MMARE11_21270	2.05617	1.03996	0.0330196	metK s-adenosylmethionine synthetase MetK 2516325:2517536 forward MW:43051
MMARE11_05870	2.15617	1.10847	0.0332138	grpE GrpE protein (Hsp-70 cofactor) 697115:697768 forward MW:22690
MMARE11_01740	2.05813	1.04134	0.0332622	MMARE11_01740 PE family protein, PE35 212150:212446 forward MW:9616
MMARE11_50040	2.05813	1.04134	0.0333317	MMARE11_50040 anti-anti-sigma regulatory factor 5971025:5971393 reverse MW:12450
MMARE11_10030	2.05813	1.04134	0.0334968	rplX 50S ribosomal protein L24, RplX 1220459:1220782 forward MW:11659
MMARE11_05040	2.067	1.04754	0.033699	esxH EsaT-6 like protein EsxH 596955:597245 forward MW:10302
MMARE11_43410	2.067	1.04754	0.0337742	pepD serine protease PepD 5256810:5258249 reverse MW:47926
MMARE11_22590	2.067	1.04754	0.0337786	MMARE11_22590 conserved hypothetical membrane protein 2670486:2670986 forward MW:18287
MMARE11_44340	2.067	1.04754	0.0337946	MMARE11_44340 conserved hypothetical membrane protein 5358095:5358898 forward MW:27834
MMARE11_46530	2.067	1.04754	0.0341453	cspA cold shock protein a, CspA 5590158:5590361 reverse MW:7354
MMARE11_35950	2.067	1.04754	0.0342187	cfp2 low molecular weight antigen Cfp2 4362707:4363216 reverse MW:16696
MMARE11_23200	2.067	1.04754	0.034219	hisB imidazole glycerol-phosphate dehydratase HisB 2756457:2757089 forward MW:22869
MMARE11_18560	2.07113	1.05042	0.0343154	ald secreted L-alanine dehydrogenase Ald (40 kDa antigen) 2226542:2227657 reverse MW:38583
MMARE11_03800	2.073	1.05172	0.034357	mce1F MCE-family protein Mce1F 439546:441099 forward MW:54375
MMARE11_12180	2.073	1.05172	0.0351373	MMARE11_12180 peptide synthetase Nrp (peptide synthase) 1467040:1476513 forward MW:340828
MMARE11_03790	2.07447	1.05274	0.0351836	lprK MCE-family lipoprotein LprK (MCE-family lipoprotein Mce1E) 438326:439552 forward MW:43773
MMARE11_06730	2.07447	1.05274	0.0352034	MMARE11_06730 conserved hypothetical membrane protein 814355:814687 forward MW:11513
MMARE11_39090	2.07447	1.05274	0.0354879	rpmE 50S ribosomal protein L31 RpmE 4759012:4759257 reverse MW:8942
MMARE11_26410	2.07987	1.05649	0.0355349	MMARE11_26410 transcriptional regulatory protein 3185584:3186000 reverse MW:15150
MMARE11_43370	2.07987	1.05649	0.0355629	MMARE11_43370 conserved hypothetical serine rich protein 5254640:5254975 forward MW:11520
MMARE11_02940	2.07987	1.05649	0.0356292	pepA serine protease PepA 348720:349793 forward MW:35129
MMARE11_49900	2.07987	1.05649	0.0356687	MMARE11_49900 conserved protein with endoribonuclease L-PSP domain 5958501:5958956 reverse MW:15242
MMARE11_18950	2.09927	1.06989	0.0356738	MMARE11_18950 conserved 35 kDa alanine rich protein 2267034:2267849 forward MW:29221
MMARE11_21420	2.1	1.07039	0.0356914	lprG conserved lipoprotein LprG 2533107:2533808 reverse MW:24240
MMARE11_30740	2.1	1.07039	0.0357625	mbtH conserved protein MbtH 3690308:3690538 reverse MW:8672
MMARE11_04930	2.1	1.07039	0.0360673	MMARE11_04930 transcriptional regulatory protein (possibly TetR-family) 582411:583067 reverse MW:23348
MMARE11_15000	2.1	1.07039	0.0361483	MMARE11_15000 conserved hypothetical protein 1785193:1785816 forward MW:23471
MMARE11_10830	2.587	1.37128	0.0361837	groES 10 kDa chaperone (GroES) 1296070:1296372 forward MW:10715
MMARE11_08270	2.1	1.07039	0.0362937	MMARE11_08270 conserved hypothetical membrane protein 1015458:1015610 reverse MW:5537
MMARE11_10050	2.1	1.07039	0.036304	rpsN 30S ribosomal protein S14, RpsN 1221356:1221541 forward MW:6866
MMARE11_22620	2.1	1.07039	0.0363603	Cluster of pks5 probable polyketide synthase Pks5 2673622:2679894 reverse MW:222563 (MMARE11_22620)
MMARE11_03770	2.11147	1.07825	0.0363696	mce1C MCE-family protein Mce1C 435160:436725 forward MW:54522
MMARE11_06050	2.11147	1.07825	0.0365062	coxM carbon monoxyde dehydrogenase (medium chain), CoxM 734323:735213 forward MW:31479
MMARE11_05880	2.11733	1.08225	0.0365368	dnaJ chaperone protein, DnaJ 697826:699016 forward MW:41571
MMARE11_43400	2.12383	1.08667	0.0365698	moaB2 pterin-4-alpha-carbinolamine dehydratase MoaB2 5256268:5256813 reverse MW:18347
MMARE11_07350	2.12713	1.08891	0.036618	lpd dihydrolipoamide dehydrogenase Lpd 889104:890507 forward MW:49562
MMARE11_40950	2.133	1.09288	0.03671	MMARE11_40950 PE family protein 4981012:4981878 forward MW:29440
MMARE11_00920	2.13333	1.09311	0.0368345	MMARE11_00920 conserved hypothetical protein 122248:123339 forward MW:38394
MMARE11_00730	2.14227	1.09914	0.0370361	rpsR1 30S ribosomal protein S18-1 RpsR1 74045:74299 forward MW:9542
MMARE11_28140	2.1464	1.10192	0.0372108	MMARE11_28140 PE family protein 3364264:3364956 reverse MW:22113
MMARE11_25980	2.1464	1.10192	0.0374208	mycP5 proline rich membrane-anchored mycosin MycP5 3128142:3129884 forward MW:59837
MMARE11_13500	2.15277	1.10619	0.0374289	MMARE11_13500 hypothetical protein 1624752:1625015 forward MW:9879
MMARE11p_00230	2.16017	1.11114	0.0379275	MMARE11p_00230 hypothetical protein 111572:112387 forward MW:30261
MMARE11_00770	2.1685	1.1167	0.037971	MMARE11_00770 conserved hypothetical protein 78602:78850 forward MW:9331
MMARE11_21230	2.16867	1.11681	0.0380852	mihF integration host factor MihF 2513462:2513797 forward MW:12118
MMARE11_40940	2.18077	1.12484	0.0381733	fbiC F420 biosynthesis protein FbiC 4978237:4980807 reverse MW:92063
MMARE11_23730	2.20323	1.13962	0.0384157	rplT 50S ribosomal protein L20 RplT 2822834:2823223 forward MW:14472
MMARE11_09900	2.21033	1.14426	0.0384272	rpsS 50S ribosomal protein S19, RpsS 1210000:1210281 forward MW:10789
MMARE11_11910	2.22077	1.15106	0.0384712	lpdA dihydrolipoamide dehydrogenase LpdA 1431911:1433320 forward MW:49140
MMARE11p_00080	2.223	1.15251	0.0385051	MMARE11p_00080 Biofilm regulator BssS 15685:17151 reverse MW:48142
MMARE11_29500	2.22553	1.15415	0.0386348	MMARE11_29500 conserved hypothetical protein 3524338:3524643 forward MW:11772
MMARE11_51710	2.22553	1.15415	0.0388054	MMARE11_51710 conserved hypothetical protein 6159495:6159980 forward MW:17392
MMARE11_06070	2.233	1.15898	0.0389871	coxL carbon monoxyde dehydrogenase (large chain), CoxL 735692:738082 forward MW:85536
MMARE11_34820	2.233	1.15898	0.0394874	plcB membrane-associated phospholipase C 2 PlcB 4227975:4229540 reverse MW:56636
MMARE11_32380	2.2435	1.16575	0.039493	acpM meromycolate extension acyl carrier protein AcpM 3950863:3951210 forward MW:12454
MMARE11_35630	2.24407	1.16612	0.039709	MMARE11_35630 conserved hypothetical protein 4330452:4330769 reverse MW:11168
MMARE11_23720	2.2508	1.17044	0.0400777	rpmL 50S ribosomal protein L35, RpmL 2822569:2822763 forward MW:7266
MMARE11_36760	2.25493	1.17308	0.0401355	ndkA nucleoside diphosphate kinase NdkA 4477559:4477969 reverse MW:14664
MMARE11_22950	2.267	1.18078	0.0404776	MMARE11_22950 conserved protein 2727538:2727975 forward MW:16434
MMARE11_53070	2.27777	1.18762	0.0406601	trxC thioredoxin TrxC 6327240:6327593 forward MW:12565
MMARE11_08540	2.3	1.20163	0.0407012	MMARE11_08540 transcriptional regulator 1041867:1042460 reverse MW:21307
MMARE11_39010	2.31487	1.21093	0.0408255	atpF ATP synthase B chain AtpF 4752657:4753169 reverse MW:18137
MMARE11_29890	2.34153	1.22745	0.0410438	MMARE11_29890 conserved hypothetical protein 3570204:3571172 forward MW:31145
MMARE11_31040	2.34913	1.23213	0.0412642	MMARE11_31040 conserved hypothetical membrane protein 3743669:3744073 reverse MW:14603
MMARE11_52730	2.37897	1.25034	0.0412928	MMARE11_52730 PE family protein 6286238:6286534 forward MW:9545, PE35
MMARE11_44860	2.41777	1.27368	0.0413134	cspB cold shock-like protein B CspB 5423033:5423437 reverse MW:14837
MMARE11_28530	2.4178	1.27369	0.0413616	MMARE11_28530 ferredoxin reductase FdxD 3402083:3402298 reverse MW:7808
MMARE11_21100	2.433	1.28274	0.0414195	lprF conserved lipoprotein LprF 2497043:2497921 forward MW:29985
MMARE11_26240	2.4523	1.29414	0.04159	gcvH glycine cleavage system H protein GcvH 3162098:3162502 forward MW:14194
MMARE11_04050	2.47443	1.3071	0.041813	MMARE11_04050 conserved hypothetical protein 469640:470179 reverse MW:19769
MMARE11_09000	2.47673	1.30844	0.0418374	lpqN conserved lipoprotein, LpqN 1103738:1104418 reverse MW:23270
MMARE11_35200	2.51097	1.32824	0.0418928	MMARE11_35200 conserved hypothetical secreted protein 4266972:4267754 reverse MW:25608
MMARE11_16470	2.5212	1.33411	0.041954	hupB DNA-binding protein Hu, HupB 1959814:1960476 forward MW:22762
MMARE11_47530	2.533	1.34085	0.0419571	MMARE11_47530 conserved membrane protein 5695745:5696473 forward MW:24806
MMARE11_26820	2.54607	1.34827	0.0420793	bfrA bacterioferritin BfrA 3226598:3227077 forward MW:18303
MMARE11_47690	2.55697	1.35443	0.0421462	MMARE11_47690 conserved hypothetical protein 5716971:5717234 forward MW:9484
MMARE11_30850	2.5673	1.36025	0.0425185	wag31 conserved secreted antigen Wag31 3719662:3720456 reverse MW:28732
MMARE11_08580	2.57363	1.36381	0.0425312	MMARE11_08580 conserved protein 1045704:1046039 reverse MW:11842
MMARE11_27170	2.60873	1.38335	0.0428336	MMARE11_27170 PE-PGRS family protein 3263504:3263818 forward MW:8396
MMARE11_16200	2.6267	1.39325	0.042842	gatC glutamyl-tRNA(Gln) amidotransferase (subunit C) GatC 1929290:1929589 forward MW:10523
MMARE11_36730	2.633	1.39671	0.0435471	rpmA 50S ribosomal protein L27 RpmA 4473338:4473604 reverse MW:9258
MMARE11_38610	2.63333	1.39689	0.0436007	mce3B_1 MCE-family protein Mce3B_1 4697381:4698412 forward MW:36777
MMARE11_20020	2.7	1.43296	0.0439578	MMARE11_20020 conserved hypothetical protein 2374774:2375064 forward MW:10578
MMARE11_15690	2.81057	1.49086	0.0439742	MMARE11_15690 conserved protein 1874322:1874774 forward MW:16261
MMARE11_36810	2.81553	1.49341	0.0440132	MMARE11_36810 conserved hypothetical membrane protein 4483327:4483923 reverse MW:19688
MMARE11_32190	2.83333	1.5025	0.0440241	MMARE11_32190 conserved hypothetical protein 3927634:3927828 reverse MW:6869
MMARE11_06210	2.83333	1.5025	0.0444434	MMARE11_06210 conserved membrane protein 753027:753842 reverse MW:29511
MMARE11_26980	2.86667	1.51937	0.0444721	fbpB secreted antigen 85-B FbpB 3244837:3245814 reverse MW:34458
MMARE11_30080	2.967	1.569	0.0445347	MMARE11_30080 conserved protein 3595279:3595473 reverse MW:6943
MMARE11_40890	2.9685	1.56973	0.0447882	Cluster of fdxC ferredoxin FdxC 4971112:4971438 reverse MW:11896 (MMARE11_40890)
MMARE11_23680	3.02437	1.59663	0.0450435	MMARE11_23680 conserved hypothetical protein 2816322:2816576 reverse MW:9346
MMARE11_00070	3.04663	1.60722	0.0451994	MMARE11_00070 conserved hypothetical membrane protein 9951:10853 forward MW:30859
MMARE11_26580	3.133	1.64754	0.0452947	apa alanine and proline rich secreted protein Apa 3200453:3201487 forward MW:34869
MMARE11_49230	3.133	1.64754	0.0454306	lsr2 iron-regulated Lsr2 protein precursor 5890323:5890664 reverse MW:12065
MMARE11_20110	3.13333	1.6477	0.0455095	MMARE11_20110 conserved hypothetical protein 2384491:2384772 forward MW:9942
MMARE11_09600	3.16667	1.66297	0.0455706	MMARE11_09600 conserved hypothetical membrane protein 1179333:1179809 reverse MW:15662
MMARE11_00410	3.167	1.66312	0.0456441	transcriptional regulatory protein
MMARE11_06110	3.16973	1.66436	0.0456736	MMARE11_06110 membrane oxidoreductase 740456:741130 forward MW:24023
MMARE11_33970	3.18963	1.67339	0.0457249	MMARE11_33970 conserved hypothetical secreted protein 4129328:4129654 reverse MW:11324
MMARE11_10480	3.2	1.67807	0.0458713	rplQ 50S ribosomal protein L17, RplQ 1257523:1258092 forward MW:20281
MMARE11_07490	3.2236	1.68867	0.0460415	hbhA iron-regulated heparin binding hemagglutinin HbhA 903392:903997 forward MW:21886
MMARE11_41110	3.267	1.70797	0.0461111	MMARE11_41110 conserved hypothetical protein 4997210:4997398 reverse MW:6880
MMARE11_49910	3.3443	1.7417	0.0463995	MMARE11_49910 conserved hypothetical protein 5958978:5959139 reverse MW:5948
MMARE11_21380	3.433	1.77947	0.046499	Fmu protein
MMARE11_30020	3.49167	1.80392	0.0465106	tatA sec-independent protein translocase membrane-bound protein, TatA 3589734:3590000 reverse MW:9513
MMARE11_28500	3.5864	1.84254	0.0466444	MMARE11_28500 conserved hypothetical secreted protein 3398934:3399257 forward MW:11065
MMARE11_27060	3.677	1.87853	0.0467663	MMARE11_27060 conserved secreted protein 3252688:3252906 forward MW:7431
MMARE11_29390	3.71327	1.89269	0.0468023	MMARE11_29390 conserved hypothetical membrane protein 3501015:3501830 forward MW:28296
MMARE11_28420	3.72753	1.89822	0.0471762	MMARE11_28420 conserved hypothetical protein 3391057:3391335 forward MW:9838
MMARE11_32020	3.8102	1.92987	0.0471816	MMARE11_32020 conserved hypothetical membrane protein 3903838:3904350 reverse MW:17816
MMARE11_29120	3.8601	1.94864	0.047213	MMARE11_29120 conserved protein 3476868:3477101 forward MW:8066
MMARE11_05210	3.86013	1.94865	0.047488	MMARE11_05210 conserved hypothetical protein 614312:614698 forward MW:13977
MMARE11_11420	3.933	1.97563	0.0476751	MMARE11_11420 exported protein 1376950:1377378 reverse MW:14764
MMARE11_31060	4.15743	2.05569	0.0476773	lppM conserved lipoprotein LppM 3745083:3745811 forward MW:25544
MMARE11_51810	4.2	2.07039	0.0479082	MMARE11_51810 conserved hypothetical membrane protein 6176782:6177249 forward MW:16443
MMARE11_08280	4.26347	2.09203	0.047913	MMARE11_08280 conserved hypothetical membrane protein 1015705:1016025 forward MW:10967
MMARE11_25430	4.28877	2.10056	0.047954	MMARE11_25430 conserved hypothetical protein 3058779:3059456 forward MW:24975
MMARE11_29170	5.26583	2.39666	0.0480589	fdxA_2 ferredoxin FdxA_2 3480329:3480673 reverse MW:12307
MMARE11_48760	5.333	2.41495	0.048368	MMARE11_48760 conserved hypothetical secreted protein 5842064:5842471 forward MW:14642
MMARE11_44780	5.9165	2.56474	0.048617	MMARE11_44780 conserved transmembrane protein 5415055:5415342 forward MW:10092
MMARE11_52750	6.467	2.6931	0.0487377	10 kDa culture filtrate antigen EsxB
MMARE11_52760	6.967	2.80054	0.0488834	6 kDa culture filtrate antigen EsxA
MMARE11_52240	7.17753	2.84349	0.0490717	hns histone-like protein Hns 6231300:6231770 forward MW:16131
MMARE11_35620	7.2783	2.8636	0.0490791	Cluster of esxP_2 EsaT-6 like protein EsxP_2 4330023:4330319 reverse MW:10923 (MMARE11_35620)
MMARE11_34040	7.3425	2.87627	0.0490853	MMARE11_34040 conserved hypothetical protein 4136585:4136842 forward MW:9575
MMARE11_01760	8.0231	3.00416	0.049225	esxB_1 10 kDa culture filtrate antigen EsxB_1 213713:214015 forward MW:10736
MMARE11_25390	8.2449	3.0435	0.0493324	MMARE11_25390 putative signal-transduction protein containing cAMP-binding and CBS domains 3054171:3054587 reverse MW:14267
MMARE11_04660	8.33733	3.05959	0.0494077	MMARE11_04660 conserved hypothetical protein 553386:553544 reverse MW:5975
MMARE11_04280	8.4755	3.0833	0.0494264	MMARE11_04280 long-chain-fatty-acid-CoA ligase 500545:502032 forward MW:52630
MMARE11_09200	9.7118	3.27974	0.0495045	secE preprotein translocase (tail-anchored membrane protein), SecE 1128333:1128821 forward MW:17255
MMARE11_52820	0.438767	-1.18847	0.0495911	MMARE11_52820 Esx-1 secretion associated protein EspL 6297724:6298071 reverse MW:12267

## Sheet: ESX1_MT (S3)
Complete list of genes of which expression is significantly changed in the auxotrophic M. tuberculosis RD1 deletion mutant strain mc26030 compared to its isogenic control strain mc26020 during growth in 7H9 culture medium. P<0.05
Gene ID	foldChange	log2FoldChange	pval	Product
Rv3876	0.00289216	-8.43364	1.51806e-297	Rv3876 CONSERVED HYPOTHETICAL PROLINE AND ALANINE RICH PROTEIN (espI)
Rv3877	0.00268077	-8.54314	2.03767e-289	Rv3877 PROBABLE CONSERVED TRANSMEMBRANE PROTEIN (eccD1)
Rv3872	0.000255378	-11.9351	3.63828e-275	Rv3872 PE FAMILY-RELATED PROTEIN (PE35)
Rv3875	0.000107387	-13.1849	1.94379e-252	Rv3875 6 KDA EARLY SECRETORY ANTIGENIC TARGET ESXA (ESAT-6)
Rv3874	0.000109685	-13.1543	1.41356e-166	Rv3874 10 KDA CULTURE FILTRATE ANTIGEN ESXB (LHP) (CFP10)
Rv3878	0.00202609	-8.94709	5.08745e-165	Rv3878 CONSERVED HYPOTHETICAL ALANINE RICH PROTEIN (espJ)
Rv3873	0.000373816	-11.3854	6.52602e-111	Rv3873 PPE FAMILY PROTEIN (PPE68)
Rv3879c	0.0450715	-4.47164	4.92359e-86	Rv3879c HYPOTHETICAL ALANINE AND PROLINE RICH PROTEIN
Rv3290c	0.045131	-4.46974	1.10495e-84	Rv3290c PROBABLE L-LYSINE-EPSILON AMINOTRANSFERASE LAT (L-LYSINE AMINOTRANSFERASE) (LYSINE 6-AMINOTRANSFERASE)
Rv1986	0.21079	-2.24612	1.4391e-57	Rv1986 PROBABLE CONSERVED INTEGRAL MEMBRANE PROTEIN
Rv3289c	0.038791	-4.68813	3.26352e-40	Rv3289c POSSIBLE TRANSMEMBRANE PROTEIN
Rv1295	2.79571	1.48321	5.2102e-24	Rv1295 PROBABLE THREONINE SYNTHASE THRC
Rv3293	0.365102	-1.45363	3.41025e-23	Rv3293 PROBABLE PIPERIDEINE-6-CARBOXILIC ACID DEHYDROGENASE PCD (PIPERIDEINE-6-CARBOXYLATE DEHYDROGENASE)
Rv1294	2.58232	1.36867	3.19026e-21	Rv1294 PROBABLE HOMOSERINE DEHYDROGENASE THRA
Rv3862c	0.206552	-2.27542	7.9534e-19	Rv3862c POSSIBLE TRANSCRIPTIONAL REGULATORY PROTEIN WHIB-LIKE WHIB6
Rv3288c	0.177186	-2.49666	3.23225e-14	Rv3288c PUTATIVE PROTEIN USFY
Rv3861	0.258577	-1.95134	4.62487e-14	Rv3861 HYPOTHETICAL PROTEIN
Rv1361c	0.530633	-0.914215	9.48309e-14	Rv1361c PPE FAMILY PROTEIN
Rv1296	2.85237	1.51216	2.97401e-12	Rv1296 PROBABLE HOMOSERINE KINASE THRB
Rv3292	0.322783	-1.63137	3.61643e-12	Rv3292 CONSERVED HYPOTHETICAL PROTEIN
Rv1196	2.43762	1.28547	1.00851e-08	Rv1196 PPE FAMILY PROTEIN
Rv2053c	0.602158	-0.731787	3.2856e-07	Rv2053c PROBABLE TRANSMEMBRANE PROTEIN
Rv1076	0.660256	-0.598902	7.15804e-06	Rv1076 POSSIBLE LIPASE LIPU
Rv3197A	0.594838	-0.749431	1.50899e-05	Rv3197A PROBABLE TRANSCRIPTIONAL REGULATORY PROTEIN WHIB-LIKE WHIB7
Rv1773c	0.668527	-0.580942	3.73817e-05	Rv1773c PROBABLE TRANSCRIPTIONAL REGULATORY PROTEIN
Rv3294c	0.493093	-1.02007	4.73638e-05	Rv3294c CONSERVED HYPOTHETICAL PROTEIN
Rv3863	0.674725	-0.567629	4.76695e-05	Rv3863 HYPOTHETICAL ALANINE RICH PROTEIN
Rv3259	0.688488	-0.538497	7.23881e-05	Rv3259 CONSERVED HYPOTHETICAL PROTEIN
Rv1187	0.644549	-0.633638	7.26761e-05	Rv1187 PROBABLE PYRROLINE-5-CARBOXYLATE DEHYDROGENASE ROCA
Rv2319c	2.12845	1.0898	9.84949e-05	Rv2319c HYPOTHETICAL PROTEIN
Rv2885c	0.679108	-0.558287	0.000117267	Rv2885c PROBABLE TRANSPOSASE
Rv1374c	1.36109	0.444764	0.000279541	Rv1374c HYPOTHETICAL PROTEIN
Rv1768	0.706996	-0.500226	0.000289632	Rv1768 PE-PGRS FAMILY PROTEIN
Rv0341	0.474182	-1.07649	0.0003504	Rv0341 ISONIAZID INDUCTIBLE GENE PROTEIN INIB
Rv3287c	0.70596	-0.502342	0.000388703	Rv3287c ANTI-SIGMA FACTOR RSBW (SIGMA NEGATIVE EFFECTOR)
Rv0709	1.36903	0.453154	0.000499768	Rv0709 PROBABLE 50S RIBOSOMAL PROTEIN L29 RPMC
Rv1217c	0.680548	-0.555232	0.000528291	Rv1217c PROBABLE TETRONASIN-TRANSPORT INTEGRAL MEMBRANE PROTEIN ABC TRANSPORTER
Rv3340	1.45651	0.542519	0.00053324	Rv3340 PROBABLE O-ACETYLHOMOSERINE SULFHYDRYLASE METC (HOMOCYSTEINE SYNTHASE) (O-ACETYLHOMOSERINE (THIOL)-LYASE) (OAH SULFHYDRYLASE) (O-ACETYL-L-HOMOSERINE SULFHYDRYLASE)
Rv2132	1.45391	0.539938	0.000545781	Rv2132 CONSERVED HYPOTHETICAL PROTEIN
Rv3588c	0.759186	-0.397475	0.00078313	Rv3588c CARBONIC ANHYDRASE (CARBONATE DEHYDRATASE) (CARBONIC DEHYDRATASE)
Rv3291c	0.277103	-1.85151	0.000865999	Rv3291c PROBABLE TRANSCRIPTIONAL REGULATORY PROTEIN (PROBABLY ASNC-FAMILY)
Rv3269	0.723942	-0.466053	0.000891774	Rv3269 CONSERVED HYPOTHETICAL PROTEIN
Rv1805c	0.761178	-0.393694	0.00107971	Rv1805c HYPOTHETICAL PROTEIN
Rv1698	0.747515	-0.419825	0.00134773	Rv1698 CONSERVED HYPOTHETICAL PROTEIN
Rv0702	1.3047	0.383721	0.00154066	Rv0702 PROBABLE 50S RIBOSOMAL PROTEIN L4 RPLD
Rv2745c	0.750931	-0.413248	0.00190387	Rv2745c POSSIBLE TRANSCRIPTIONAL REGULATORY PROTEIN
Rv2255c	0.672557	-0.572272	0.00195616	Rv2255c HYPOTHETICAL PROTEIN
Rv0718	1.35229	0.435406	0.00212766	Rv0718 PROBABLE 30S RIBOSOMAL PROTEIN S8 RPSH
Rv2825c	0.694596	-0.525754	0.00220902	Rv2825c CONSERVED HYPOTHETICAL PROTEIN
Rv3880c	0.763357	-0.38957	0.0023207	Rv3880c CONSERVED HYPOTHETICAL PROTEIN
Rv2894c	0.746789	-0.421227	0.00245987	Rv2894c PROBABLE INTEGRASE/RECOMBINASE XERC
Rv1765c	0.7286	-0.456802	0.00248755	Rv1765c CONSERVED HYPOTHETICAL PROTEIN
Rv2886c	0.634363	-0.656619	0.00254808	Rv2886c PROBABLE RESOLVASE
Rv1856c	1.33315	0.414838	0.00259462	Rv1856c POSSIBLE OXIDOREDUCTASE
Rv1497	0.769605	-0.37781	0.00273111	Rv1497 PROBABLE ESTERASE LIPL
Rv0040c	0.741647	-0.431196	0.00279873	Rv0040c SECRETED PROLINE RICH PROTEIN MTC28 (PROLINE RICH 28 KDA ANTIGEN)
Rv1810	0.772808	-0.371817	0.00280782	Rv1810 CONSERVED HYPOTHETICAL PROTEIN
Rv2052c	0.754954	-0.405539	0.00292083	Rv2052c CONSERVED HYPOTHETICAL PROTEIN
Rv3136	1.40044	0.485876	0.00302143	Rv3136 PPE FAMILY PROTEIN
Rv1987	0.697577	-0.519575	0.00346571	Rv1987 POSSIBLE CHITINASE
Rv0715	1.29291	0.370624	0.00366681	Rv0715 PROBABLE 50S RIBOSOMAL PROTEIN L24 RPLX
Rv2986c	0.775301	-0.367171	0.00369125	Rv2986c PROBABLE DNA-BINDING PROTEIN HU HOMOLOG HUPB (HISTONE-LIKE PROTEIN) (HLP) (21-KDA LAMININ-2-BINDING PROTEIN)
Rv3864	0.772957	-0.371539	0.00370739	Rv3864 CONSERVED HYPOTHETICAL PROTEIN
Rv3413c	0.783717	-0.351596	0.0038015	Rv3413c HYPOTHETICAL ALANINE AND PROLINE RICH PROTEIN
Rv2030c	1.60019	0.678242	0.00400991	Rv2030c CONSERVED HYPOTHETICAL PROTEIN
Rv0794c	0.726224	-0.461514	0.00439874	Rv0794c PROBABLE OXIDOREDUCTASE
Rv0342	0.583841	-0.776352	0.00459518	Rv0342 ISONIAZID INDUCTIBLE GENE PROTEIN INIA
Rv0814c	0.770318	-0.376473	0.00504957	Rv0814c CONSERVED HYPOTHETICAL PROTEIN SSEC2
Rv2321c	0.603098	-0.729536	0.00513494	Rv2321c PROBABLE ORNITHINE AMINOTRANSFERASE (C-terminus part) ROCD2 (ORNITHINE--OXO-ACID AMINOTRANSFERASE)
Rv1068c	2.07462	1.05285	0.0051407	Rv1068c PE-PGRS FAMILY PROTEIN
Rv0722	1.30669	0.38592	0.00578177	Rv0722 PROBABLE 50S RIBOSOMAL PROTEIN L30 RPMD
Rv2985	0.796769	-0.327766	0.00583971	Rv2985 POSSIBLE HYDROLASE MUTT1
Rv0708	1.28655	0.363508	0.00598191	Rv0708 PROBABLE 50S RIBOSOMAL PROTEIN L16 RPLP
Rv1954c	0.751107	-0.412909	0.00608676	Rv1954c HYPOTHETICAL PROTEIN
Rv0716	1.26731	0.341769	0.00615459	Rv0716 PROBABLE 50S RIBOSOMAL PROTEIN L5 RPLE
Rv0717	1.28913	0.366401	0.00692763	Rv0717 PROBABLE 30S RIBOSOMAL PROTEIN S14 RPSN1
Rv0721	1.26068	0.334203	0.00707743	Rv0721 PROBABLE 30S RIBOSOMAL PROTEIN S5 RPSE
Rv2950c	1.24928	0.321099	0.00708041	Rv2950c PROBABLE FATTY-ACID-CoA LIGASE FADD29 (FATTY-ACID-CoA SYNTHETASE) (FATTY-ACID-CoA SYNTHASE)
Rv2190c	1.26379	0.337758	0.00741391	Rv2190c CONSERVED HYPOTHETICAL PROTEIN
Rv2911	1.3382	0.420291	0.00764235	Rv2911 PROBABLE D-ALANYL-D-ALANINE CARBOXYPEPTIDASE DACB2 (PENICILLIN-BINDING PROTEIN) (DD-PEPTIDASE) (DD-CARBOXYPEPTIDASE) (PBP) (DD-TRANSPEPTIDASE) (SERINE-TYPE D-ALA-D-ALA CARBOXYPEPTIDASE) (D-AMINO ACID HYDROLASE)
Rv2748c	0.798533	-0.324575	0.00810208	Rv2748c POSSIBLE CELL DIVISION TRANSMEMBRANE PROTEIN FTSK
Rv0098	1.57292	0.653445	0.00811355	Rv0098 CONSERVED HYPOTHETICAL PROTEIN
Rv3756c	0.754468	-0.406469	0.00840984	Rv3756c POSSIBLE OSMOPROTECTANT (GLYCINE BETAINE/CARNITINE/CHOLINE/L-PROLINE) TRANSPORT INTEGRAL MEMBRANE PROTEIN ABC TRANSPORTER PROZ
Rv3867	0.793993	-0.332803	0.00849671	Rv3867 CONSERVED HYPOTHETICAL PROTEIN
Rv2710	0.810723	-0.302718	0.00862961	Rv2710 RNA POLYMERASE SIGMA FACTOR SIGB
Rv1964	0.6397	-0.644532	0.00875152	Rv1964 CONSERVED HYPOTHETICAL INTEGRAL MEMBRANE PROTEIN YRBE3A
Rv0397	0.63155	-0.663032	0.0087582	Rv0397 CONSERVED 13E12 REPEAT FAMILY PROTEIN
Rv1434	0.756265	-0.403036	0.00878983	Rv1434 HYPOTHETICAL PROTEIN
Rv1778c	0.676908	-0.562968	0.00921113	Rv1778c HYPOTHETICAL PROTEIN
Rv3695	0.71415	-0.485701	0.00925989	Rv3695 POSSIBLE CONSERVED MEMBRANE PROTEIN
Rv2978c	0.776784	-0.364415	0.00959224	Rv2978c PROBABLE TRANSPOSASE
Rv0804	0.751315	-0.412509	0.0098044	Rv0804 CONSERVED HYPOTHETICAL PROTEIN
Rv0118c	1.4384	0.524467	0.0103272	Rv0118c PROBABLE OXALYL-CoA DECARBOXYLASE OXCA
Rv1772	0.792484	-0.335546	0.0103498	Rv1772 HYPOTHETICAL PROTEIN
Rv0707	1.2455	0.316721	0.0105034	Rv0707 PROBABLE 30S RIBOSOMAL PROTEIN S3 RPSC
Rv2244	0.811323	-0.301652	0.0106666	Rv2244 MEROMYCOLATE EXTENSION ACYL CARRIER PROTEIN ACPM
Rv1359	0.710178	-0.493746	0.0108872	Rv1359 PROBABLE TRANSCRIPTIONAL REGULATORY PROTEIN
Rv0710	1.25904	0.332321	0.0110838	Rv0710 PROBABLE 30S RIBOSOMAL PROTEIN S17 RPSQ
Rv2975c	0.728486	-0.457026	0.0111678	Rv2975c CONSERVED HYPOTHETICAL PROTEIN
Rv3881c	0.81246	-0.299631	0.011564	Rv3881c CONSERVED HYPOTHETICAL ALANINE AND GLYCINE RICH PROTEIN
Rv2504c	0.788497	-0.342822	0.011663	Rv2504c PROBABLE SUCCINYL-COA:3-KETOACID-COENZYME A TRANSFERASE (ALPHA SUBUNIT) SCOA (3-OXO ACID:CoA TRANSFERASE) (OXCT A) (SUCCINYL-COA:3-OXOACID-COENZYME A TRANSFERASE)
Rv2422	2.29986	1.20154	0.0123739	Rv2422 HYPOTHETICAL PROTEIN
Rv0039c	0.792529	-0.335465	0.0125734	Rv0039c POSSIBLE CONSERVED TRANSMEMBRANE PROTEIN
Rv0053	1.27151	0.346547	0.0126502	Rv0053 PROBABLE 30S RIBOSOMAL PROTEIN S6 RPSF
Rv1198	1.23484	0.304322	0.0127214	Rv1198 PUTATIVE ESAT-6 LIKE PROTEIN ESXL (ESAT-6 LIKE PROTEIN 4)
Rv2974c	0.731234	-0.451595	0.0129977	Rv2974c CONSERVED HYPOTHETICAL ALANINE RICH PROTEIN
Rv3871	0.810405	-0.303286	0.0135775	Rv3871 CONSERVED HYPOTHETICAL PROTEIN
Rv3176c	0.671875	-0.573734	0.0140774	Rv3176c PROBABLE EPOXIDE HYDROLASE MEST (EPOXIDE HYDRATASE) (ARENE-OXIDE HYDRATASE)
Rv2959c	1.29108	0.36858	0.0142669	Rv2959c POSSIBLE METHYLTRANSFERASE (METHYLASE)
Rv0737	0.621188	-0.686899	0.0149902	Rv0737 POSSIBLE TRANSCRIPTIONAL REGULATORY PROTEIN
Rv3357	1.59203	0.670867	0.015405	Rv3357 CONSERVED HYPOTHETICAL PROTEIN
Rv2910c	1.42885	0.514859	0.0154136	Rv2910c CONSERVED HYPOTHETICAL PROTEIN
Rv0720	1.2619	0.335595	0.0158538	Rv0720 PROBABLE 50S RIBOSOMAL PROTEIN L18 RPLR
Rv3485c	1.32675	0.407902	0.0163982	Rv3485c PROBABLE SHORT-CHAIN TYPE DEHYDROGENASE/REDUCTASE
Rv2999	1.37556	0.460018	0.016677	Rv2999 PROBABLE CONSERVED LIPOPROTEIN LPPY
Rv0704	1.24911	0.320901	0.0170902	Rv0704 PROBABLE 50S ribosomal protein L2 RPLB
Rv2945c	1.25746	0.330512	0.0180747	Rv2945c PROBABLE CONSERVED LIPOPROTEIN LPPX
Rv2650c	0.72334	-0.467253	0.0181224	Rv2650c POSSIBLE phiRv2 PROPHAGE PROTEIN
Rv1748	0.747832	-0.419214	0.0184382	Rv1748 HYPOTHETICAL PROTEIN
Rv0179c	0.786029	-0.347345	0.0185528	Rv0179c POSSIBLE LIPOPROTEIN LPRO
Rv1751	0.811516	-0.301309	0.0186537	Rv1751 PROBABLE OXIDOREDUCTASE
Rv0612	0.701613	-0.511252	0.018994	Rv0612 CONSERVED HYPOTHETICAL PROTEIN
Rv1387	1.25651	0.329426	0.0190991	Rv1387 PPE FAMILY PROTEIN
Rv3076	0.689502	-0.536373	0.0193965	Rv3076 CONSERVED HYPOTHETICAL PROTEIN
Rv2776c	0.783753	-0.351529	0.0198835	Rv2776c PROBABLE OXIDOREDUCTASE
Rv2301	1.25374	0.32624	0.0203472	Rv2301 PROBABLE CUTINASE CUT2
Rv1171	1.24243	0.313164	0.0206772	Rv1171 CONSERVED HYPOTHETICAL PROTEIN
Rv1333	0.779194	-0.359945	0.0210645	Rv1333 PROBABLE HYDROLASE
Rv1658	0.792423	-0.335657	0.0214432	Rv1658 Probable Argininosuccinate synthase argG
Rv0753c	0.793613	-0.333492	0.0215058	Rv0753c PROBABLE METHYLMALONATE-SEMIALDEHYDE DEHYDROGENASE MMSA (METHYLMALONIC ACID SEMIALDEHYDE DEHYDROGENASE) (MMSDH)
Rv2354	0.46071	-1.11807	0.0217991	Rv2354 PROBABLE TRANSPOSASE
Rv0695	1.22191	0.28914	0.0225222	Rv0695 CONSERVED HYPOTHETICAL PROTEIN
Rv1205	1.25432	0.326905	0.0227268	Rv1205 CONSERVED HYPOTHETICAL PROTEIN
Rv2934	1.21348	0.279153	0.0229624	Rv2934 PHENOLPTHIOCEROL SYNTHESIS TYPE-I POLYKETIDE SYNTHASE PPSD
Rv0207c	0.825498	-0.276664	0.0230049	Rv0207c CONSERVED HYPOTHETICAL PROTEIN
Rv1905c	0.783401	-0.352177	0.02311	Rv1905c PROBABLE D-AMINO ACID OXIDASE AAO
Rv3353c	0.64817	-0.625556	0.0232346	Rv3353c CONSERVED HYPOTHETICAL PROTEIN
Rv3358	1.6426	0.715977	0.0241234	Rv3358 CONSERVED HYPOTHETICAL PROTEIN
Rv3202c	0.757275	-0.401111	0.0242314	Rv3202c POSSIBLE ATP-DEPENDENT DNA HELICASE
Rv1009	1.2186	0.285221	0.0248771	Rv1009 Probable resuscitation-promoting factor rpfB
Rv0605	0.765822	-0.38492	0.0251996	Rv0605 POSSIBLE RESOLVASE
Rv0064	0.81261	-0.299366	0.0254138	Rv0064 PROBABLE CONSERVED TRANSMEMBRANE PROTEIN
Rv2066	1.24384	0.314802	0.0257405	Rv2066 Probable bifunctional protein, CobI-CobJ fusion protein: S-adenosyl-L-methionine-precorrin-2 methyl transferase + precorrin-3 methylase
Rv0633c	0.786403	-0.346659	0.025828	Rv0633c POSSIBLE EXPORTED PROTEIN
Rv3241c	0.817177	-0.29128	0.0258972	Rv3241c CONSERVED HYPOTHETICAL PROTEIN
Rv1040c	1.67774	0.746519	0.0260071	Rv1040c PE FAMILY PROTEIN
Rv1197	1.28556	0.362399	0.026055	Rv1197 ESAT-6 LIKE PROTEIN ESXK (ESAT-6 LIKE PROTEIN 3)
Rv0093c	1.31538	0.39548	0.0261006	Rv0093c PROBABLE CONSERVED MEMBRANE PROTEIN
Rv0499	0.780747	-0.357074	0.0261897	Rv0499 CONSERVED HYPOTHETICAL PROTEIN
Rv1038c	1.60807	0.685333	0.0263317	Rv1038c ESAT-6 LIKE PROTEIN ESXJ (ESAT-6 LIKE PROTEIN 2)
Rv0210	1.28617	0.363081	0.0265639	Rv0210 HYPOTHETICAL PROTEIN
Rv0230c	1.35294	0.436095	0.0272779	Rv0230c PROBABLE PHOSPHOTRIESTERASE PHP (PARATHION HYDROLASE) (PTE) (ARYLDIALKYLPHOSPHATASE) (PARAOXONASE) (A-ESTERASE) (ARYLTRIPHOSPHATASE) (PARAOXON HYDROLASE)
Rv2791c	0.794168	-0.332484	0.0273454	Rv2791c PROBABLE TRANSPOSASE
Rv0854	1.2463	0.317652	0.0278152	Rv0854 CONSERVED HYPOTHETICAL PROTEIN
Rv0309	0.827945	-0.272393	0.0284499	Rv0309 POSSIBLE CONSERVED EXPORTED PROTEIN
Rv2416c	0.773626	-0.370292	0.0285721	Rv2416c ENHANCED INTRACELLULAR SURVIVAL PROTEIN EIS
Rv2288	1.23114	0.299993	0.0288524	Rv2288 HYPOTHETICAL PROTEIN
Rv2769c	1.41615	0.501973	0.0289744	Rv2769c PE FAMILY PROTEIN
Rv2245	0.826652	-0.274647	0.0301538	Rv2245 3-OXOACYL-[ACYL-CARRIER PROTEIN] SYNTHASE 1 KASA (BETA-KETOACYL-ACP SYNTHASE) (KAS I)
Rv0637	1.19982	0.262823	0.0302978	Rv0637 CONSERVED HYPOTHETICAL PROTEIN
Rv3238c	0.794543	-0.331803	0.0306738	Rv3238c PROBABLE CONSERVED INTEGRAL MEMBRANE PROTEIN
Rv2721c	0.834162	-0.2616	0.0307055	Rv2721c POSSIBLE CONSERVED TRANSMEMBRANE ALANINE AND GLYCINE RICH PROTEIN
Rv2165c	0.813013	-0.298649	0.0310692	Rv2165c CONSERVED HYPOTHETICAL PROTEIN
Rv0404	1.23089	0.299706	0.0313842	Rv0404 PROBABLE FATTY-ACID-CoA LIGASE FADD30 (FATTY-ACID-CoA SYNTHETASE) (FATTY-ACID-CoA SYNTHASE)
Rv1168c	1.27834	0.354268	0.031398	Rv1168c PPE FAMILY PROTEIN
Rv2220	1.19646	0.25877	0.0317634	Rv2220 GLUTAMINE SYNTHETASE GLNA1 (GLUTAMINE SYNTHASE) (GS-I)
Rv0175	1.19777	0.260347	0.0322367	Rv0175 PROBABLE CONSERVED MCE ASSOCIATED MEMBRANE PROTEIN
Rv2944	1.32125	0.401904	0.032391	Rv2944 POSSIBLE TRANSPOSASE FOR INSERTION SEQUENCE ELEMENT IS1533
Rv2068c	1.22844	0.296825	0.0336466	Rv2068c CLASS A BETA-LACTAMASE BLAC
Rv1507c	1.2206	0.28759	0.0337884	Rv1507c CONSERVED HYPOTHETICAL PROTEIN
Rv2002	1.29052	0.367954	0.0339909	Rv2002 POSSIBLE 20-BETA-HYDROXYSTEROID DEHYDROGENASE FABG3 (Cortisone reductase) ((R)-20-hydroxysteroid dehydrogenase)
Rv2873	1.44354	0.529612	0.0340779	Rv2873 CELL SURFACE LIPOPROTEIN MPT83 (LIPOPROTEIN P23)
Rv2525c	0.820368	-0.285657	0.0342252	Rv2525c CONSERVED HYPOTHETICAL PROTEIN
Rv3675	0.819061	-0.287957	0.0342912	Rv3675 POSSIBLE MEMBRANE PROTEIN
Rv1618	1.21311	0.278709	0.0343393	Rv1618 Probable acyl-CoA thioesterase II tesB1
Rv0119	1.26147	0.335107	0.0344569	Rv0119 PROBABLE FATTY-ACID-CoA LIGASE FADD7 (FATTY-ACID-CoA SYNTHETASE) (FATTY-ACID-CoA SYNTHASE)
Rv3230c	1.23049	0.299239	0.03453	Rv3230c HYPOTHETICAL OXIDOREDUCTASE
Rv2111c	1.21311	0.278714	0.0352708	Rv2111c CONSERVED HYPOTHETICAL PROTEIN
Rv0909	1.22317	0.290627	0.0354691	Rv0909 CONSERVED HYPOTHETICAL PROTEIN
Rv2015c	0.808863	-0.306032	0.0355817	Rv2015c CONSERVED HYPOTHETICAL PROTEIN
Rv1001	1.2348	0.304282	0.0366875	Rv1001 PROBABLE ARGININE DEIMINASE ARCA (ADI) (AD) (ARGININE DIHYDROLASE)
Rv0078A	0.817536	-0.290646	0.0371214	Rv0078A HYPOTHETICAL PROTEIN
Rv3891c	1.21712	0.283469	0.0374624	Rv3891c POSSIBLE ESAT-6 LIKE PROTEIN ESXD
Rv1172c	1.19746	0.25998	0.0378446	Rv1172c PE FAMILY PROTEIN
Rv3266c	0.815376	-0.294462	0.0383062	Rv3266c dTDP-6-DEOXY-L-LYXO-4-HEXULOSE REDUCTASE RMLD (dTDP-RHAMNOSE MODIFICATION PROTEIN) (dTDP-RHAMNOSE BIOSYNTHESIS PROTEIN) (dTDP-RHAMNOSE SYNTHASE)
Rv0136	0.813967	-0.296957	0.0383066	Rv0136 PROBABLE CYTOCHROME P450 138 CYP138
Rv2073c	1.34285	0.425303	0.0392858	Rv2073c Probable shortchain dehydrogenase
Rv3185	1.40551	0.491095	0.0393266	Rv3185 PROBABLE TRANSPOSASE
Rv3628	1.22318	0.290634	0.0396215	Rv3628 INORGANIC PYROPHOSPHATASE PPA (PYROPHOSPHATE PHOSPHO-HYDROLASE) (PPASE) (INORGANIC DIPHOSPHATASE) (DIPHOSPHATE PHOSPHO-HYDROLASE)
Rv0703	1.24147	0.312049	0.0398422	Rv0703 PROBABLE 50S RIBOSOMAL PROTEIN L23 RPLW
Rv2702	1.23992	0.310248	0.0407677	Rv2702 POLYPHOSPHATE GLUCOKINASE PPGK (POLYPHOSPHATE-GLUCOSE PHOSPHOTRANSFERASE)
Rv2831	1.26119	0.334781	0.0408029	Rv2831 PROBABLE ENOYL-CoA HYDRATASE ECHA16 (ENOYL HYDRASE) (UNSATURATED ACYL-CoA HYDRATASE) (CROTONASE)
Rv0599c	0.757554	-0.400579	0.0408593	Rv0599c CONSERVED HYPOTHETICAL PROTEIN
Rv1332	0.834468	-0.261071	0.0410587	Rv1332 PROBABLE TRANSCRIPTIONAL REGULATORY PROTEIN
Rv3379c	0.705706	-0.502862	0.0412494	Rv3379c PROBABLE 1-DEOXY-D-XYLULOSE 5-PHOSPHATE SYNTHASE DXS2 (1-DEOXYXYLULOSE-5-PHOSPHATE SYNTHASE) (DXP SYNTHASE) (DXPS)
Rv0330c	1.55481	0.636737	0.04131	Rv0330c HYPOTHETICAL PROTEIN
Rv0643c	1.19328	0.254929	0.0417957	Rv0643c METHOXY MYCOLIC ACID SYNTHASE 3 MMAA3 (METHYL MYCOLIC ACID SYNTHASE 3) (MMA3) (HYDROXY MYCOLIC ACID SYNTHASE)
Rv3462c	1.20165	0.265013	0.0423417	Rv3462c PROBABLE TRANSLATION INITIATION FACTOR IF-1 INFA
Rv3191c	0.831004	-0.267073	0.0424791	Rv3191c PROBABLE TRANSPOSASE
Rv1199c	1.20404	0.267884	0.0436067	Rv1199c POSSIBLE TRANSPOSASE
Rv2737c	0.843115	-0.246199	0.0442424	Rv2737c RECA PROTEIN (RECOMBINASE A) [CONTAINS: ENDONUCLEASE PI-MTUI (MTU RECA INTEIN)].
Rv3869	0.832772	-0.264007	0.0444322	Rv3869 POSSIBLE CONSERVED MEMBRANE PROTEIN
Rv2466c	0.746629	-0.421536	0.0444352	Rv2466c CONSERVED HYPOTHETICAL PROTEIN
Rv2050	0.830059	-0.268714	0.0445721	Rv2050 CONSERVED HYPOTHETICAL PROTEIN
Rv3810	0.842404	-0.247415	0.0445878	Rv3810 EXPORTED REPETITIVE PROTEIN PRECURSOR PIRG (CELL SURFACE PROTEIN) (EXP53)
Rv0115	0.788902	-0.342082	0.0448362	Rv0115 POSSIBLE D-ALPHA-D-HEPTOSE-7-PHOSPHATE KINASE HDDA
Rv1974	1.5084	0.593022	0.0448649	Rv1974 PROBABLE CONSERVED MEMBRANE PROTEIN
Rv2801c	0.732348	-0.449398	0.0449266	Rv2801c CONSERVED HYPOTHETICAL PROTEIN
Rv3161c	0.771053	-0.375098	0.0453435	Rv3161c POSSIBLE DIOXYGENASE
Rv2887	0.791565	-0.337221	0.045989	Rv2887 PROBABLE TRANSCRIPTIONAL REGULATORY PROTEIN
Rv2360c	0.78935	-0.341264	0.0460336	Rv2360c HYPOTHETICAL PROTEIN
Rv1221	0.826318	-0.275231	0.0464195	Rv1221 ALTERNATIVE RNA POLYMERASE SIGMA FACTOR SIGE
Rv2718c	0.834789	-0.260516	0.0465315	Rv2718c CONSERVED HYPOTHETICAL PROTEIN
Rv3821	0.821402	-0.283839	0.0473213	Rv3821 PROBABLE CONSERVED INTEGRAL MEMBRANE PROTEIN
Rv0888	0.842941	-0.246496	0.0479246	Rv0888 PROBABLE EXPORTED PROTEIN
Rv3651	1.26706	0.341488	0.0483863	Rv3651 CONSERVED HYPOTHETICAL PROTEIN
Rv1125	0.790184	-0.339739	0.0484575	Rv1125 CONSERVED HYPOTHETICAL PROTEIN
Rv3763	1.18124	0.240308	0.049032	Rv3763 19 KDA LIPOPROTEIN ANTIGEN PRECURSOR LPQH
Rv0134	0.834883	-0.260354	0.0492236	Rv0134 POSSIBLE EPOXIDE HYDROLASE EPHF (EPOXIDE HYDRATASE) (ARENE-OXIDE HYDRATASE)
Rv2075c	0.833983	-0.26191	0.0493782	Rv2075c Possible hypothetical exported or envelope protein
Rv2256c	0.846063	-0.241163	0.0498793	Rv2256c CONSERVED HYPOTHETICAL PROTEIN
Rv0208c	0.83207	-0.265224	0.0498826	Rv0208c HYPOTHETICAL METHLYTRANSFERASE (METHYLASE)

## Sheet: E11_INT_ESX1_INT (S4)
Complete list of genes of which expression is significantly changed in M. marinum eccCb1 transposon mutant vs wild-type strain during infection of THP-1 cells. P<0.05
gene ID	log2FoldChange	p_value	product
MMARE11_39770	4.34345	0	conserved hypothetical protein
MMARE11_17760	3.91594	2.22e-15	conserved hypothetical membrane protein
MMARE11_39780	4.05612	2e-14	conserved hypothetical protein
MMARE11_39760	4.54649	2.78e-14	ESX-1 secretion-associated protein A, EspA
MMARE11_28260	3.62881	3.38e-13	hypothetical protein
MMARE11_21360	3.47353	3.91e-13	methyltransferase
MMARE11_24440	3.42754	8.81e-13	PPE family protein
MMARE11_04720	3.30911	3.57e-12	heat shock protein Hsp
MMARE11_24450	3.72287	8.61e-12	PPE family protein, PPE23
MMARE11_10910	3.63941	2e-11	WhiB-like regulatory protein, WhiB3
MMARE11_40510	3.10429	2.57e-10	conserved integral membrane transport protein
MMARE11_46160	3.36359	5.69e-10	PE-PGRS family protein
MMARE11_19330	2.85185	2.35e-09	conserved hypothetical protein
MMARE11_33970	2.7939	4.89e-09	conserved hypothetical secreted protein
MMARE11_44970	2.89912	8.64e-09	conserved hypothetical protein
MMARE11_23810	2.79637	1.42e-08	PE-PGRS family protein
MMARE11_25880	2.55817	1.73e-08	hypothetical protein
MMARE11_47140	2.55327	1.9e-08	conserved hypothetical protein
MMARE11_28270	2.86162	1.98e-08	conserved hypothetical membrane protein
MMARE11_14990	2.61209	3.26e-08	oxidoreductase
MMARE11_29540	2.425	8.2e-08	conserved hypothetical membrane protein
MMARE11_02840	2.37137	2.1e-07	conserved hypothetical protein
MMARE11_04780	2.29715	4.37e-07	integral membrane nitrite extrusion protein NarK3_2
MMARE11_46150	2.36961	4.63e-07	integral membrane protein
MMARE11_47130	2.67367	7.04e-07	conserved hypothetical integral membrane protein
MMARE11_51420	2.41063	7.18e-07	O-methyltransferase
MMARE11_23690	2.2247	7.66e-07	conserved hypothetical membrane protein
MMARE11_19270	3.2945	9.35e-07	RNA polymerase sigma factor SigB
MMARE11_35450	3.13147	1.3e-06	integral membrane nitrite extrusion protein NarK1
MMARE11_22700	2.19091	2.53e-06	conserved hypothetical protein
MMARE11_44980	2.51764	2.63e-06	conserved hypothetical protein
MMARE11_35980	-3.81639	2.69e-06	non-ribosomal peptide synthetase
MMARE11_22690	2.12844	2.94e-06	hypothetical protein
MMARE11_19740	2.37464	3.45e-06	conserved secreted protein
MMARE11_18940	2.45756	5.48e-06	transcriptional regulatory protein
MMARE11_30210	-4.36855	5.53e-06	polyketide synthase PKS
MMARE11_46140	2.23725	5.78e-06	dehydrogenase
MMARE11_10520	2.10477	6.62e-06	PPE family protein
MMARE11_05310	2.07727	8.71e-06	conserved hypothetical protein
MMARE11_49420	1.98136	1.04e-05	EsaT-6 like protein EsxP_1
MMARE11_35190	2.65426	1.11e-05	conserved hypothetical protein
MMARE11_44450	-3.32266	1.25e-05	PPE family protein
MMARE11_30210	-3.79959	1.29e-05	polyketide synthase and peptide synthetase
MMARE11_42210	2.45363	1.31e-05	conserved hypothetical protein
MMARE11_25930	1.9424	1.57e-05	PE family protein, PE19
MMARE11_15600	-3.03276	1.85e-05	PPE family protein
MMARE11_02850	2.30965	1.97e-05	divalent cation-transport integral membrane protein
MMARE11_01310	1.99803	2.01e-05	conserved hypothetical membrane protein
MMARE11_25940	1.99466	2.24e-05	EsaT-6 like protein EsxM
MMARE11_33230	1.90729	2.24e-05	phosphate-transport permease PitB
MMARE11_24360	1.938	2.25e-05	myo-inositol-1-phosphate synthase
MMARE11_33950	1.95726	2.33e-05	conserved hypothetical protein
MMARE11_13330	2.84756	3.11e-05	transcriptional regulatory protein Whib-like WhiB7
MMARE11_49420	1.88434	3.28e-05	EsaT-6 like protein EsxP
MMARE11_10530	2.45502	3.9e-05	conserved hypothetical membrane protein
MMARE11_01780	1.9264	4.19e-05	conserved hypothetical EsxB-like protein, EsxB_2
MMARE11_28670	1.86055	4.67e-05	conserved protein
MMARE11_29130	1.89441	4.82e-05	heat shock protein transcriptional repressor HspR_2
MMARE11_04400	-5.99903	5.13e-05	PE-PGRS family protein
MMARE11_49410	2.09439	5.95e-05	EsaT-6 like protein EsxN_2
MMARE11_14930	-5.94607	6.02e-05	dehydrogenase
MMARE11_09820	-3.44681	6.34e-05	PPE family protein
MMARE11_22710	1.94676	6.36e-05	rhamnosyl transferase WbbL2
MMARE11_24430	1.80368	6.75e-05	integral membrane drug efflux protein
MMARE11_06910	2.04238	7.94e-05	transmembrane protein
MMARE11_33960	2.44269	8.07e-05	heat shock protein HspX_1
MMARE11_32450	1.8472	8.86e-05	flavoprotein
MMARE11_32600	1.9217	8.99e-05	conserved transmembrane protein, MmpS5_2
MMARE11_25890	1.78706	9.2e-05	PPE family protein, PPE25
MMARE11_31190	-3.08846	9.57041e-05	polyprenyl synthetase IdsB_1
MMARE11_35980	-2.42727	0.000127193	non-ribosomal peptide synthetase
MMARE11_36470	2.27742	0.000137056	enhanced intracellular survival protein Eis
MMARE11_35980	-2.38422	0.000156902	non-ribosomal peptide synthetase
MMARE11_52140	2.31596	0.0001627	bacterioferritin BfrB
MMARE11_21990	1.74569	0.00016291	thioredoxin TrxB1
MMARE11_41350	-3.42621	0.000165512	PPE family protein
MMARE11_42270	-3.60653	0.000168508	PE-PGRS family protein
MMARE11_33320	-3.85025	0.000182274	PE-PGRS family protein, PE_PGRS22
MMARE11_35470	2.14341	0.000192095	formate dehydrogenase H FdhF
MMARE11_52210	1.80036	0.000196578	conserved protein
MMARE11_26750	2.20597	0.000197558	alkyl hydroperoxide reductase D protein AhpD
MMARE11_51640	-5.52394	0.000209679	PE-PGRS family protein
MMARE11_01740	1.71775	0.000252169	PE family protein, PE35
MMARE11_47800	-1.57193	0.000293235	acyl-coenzyme A synthetase
MMARE11_28290	1.62954	0.000331456	cutinase precursor
MMARE11_51340	1.75374	0.000333409	19 kDa lipoprotein antigen precursor LpqH
MMARE11_41010	-4.42124	0.000356211	PE-PGRS family protein
MMARE11_01810	1.90283	0.000356536	conserved hypothetical alanine and proline rich protein
MMARE11_20420	-4.67857	0.000366339	PE-PGRS family protein
MMARE11_01290	1.61034	0.000385872	lipid-transfer protein Ltp1_1
MMARE11_08810	-5.28548	0.000413963	hypothetical protein
MMARE11_20900	1.78102	0.000415888	conserved hypothetical protein
MMARE11_27560	2.16962	0.000435838	phosphotransferase
MMARE11_01900	-1.0762	0.000439727	L-serine dehydratase SdaA
MMARE11_30210	-2.59492	0.000457174	polyketide synthase PKS
MMARE11_48090	-3.62606	0.000458594	PE-PGRS family protein
MMARE11_49410	1.61121	0.000463623	EsaT-6 like protein EsxN_1
MMARE11_11310	-2.9459	0.000475753	8-amino-7-oxononanoate synthase BioF2_5
MMARE11_41630	1.58413	0.000480228	conserved hypothetical protein
MMARE11_30210	-2.31816	0.000482192	polyketide synthase PKS
MMARE11_35620	1.64862	0.000487678	EsaT-6 like protein EsxP_2
MMARE11_15410	1.65182	0.000499341	conserved hypothetical protein
MMARE11_35980	-2.33979	0.000505738	non-ribosomal peptide synthetase
MMARE11_50750	-1.31024	0.000540716	membrane-anchored adenylyl cyclase
MMARE11_19120	2.15651	0.0005507	GTP-binding protein HflX
MMARE11_09820	-2.65677	0.000572223	PPE family protein
MMARE11_46800	1.64129	0.000574011	conserved hypothetical protein
MMARE11_52510	-4.26205	0.00058406	conserved hypothetical transmembrane protein
MMARE11_51030	3.4447	0.000603196	PE family protein, PE34
MMARE11_04300	-3.63083	0.000617377	fatty-acid-CoA ligase
MMARE11_36700	-3.82418	0.00061804	PE-PGRS family protein
MMARE11_15600	-2.0884	0.000630431	PPE family protein
MMARE11_40830	-5.03811	0.00066857	PPE family protein
MMARE11_25770	-3.60538	0.000672015	PE-PGRS family protein, PE_PGRS50
MMARE11_16240	1.54843	0.000674731	oxidoreductase
MMARE11_33990	1.55112	0.000716676	conserved hypothetical protein
MMARE11_29530	1.64291	0.000722974	conserved hypothetical protein
MMARE11_18950	1.66955	0.000729312	conserved 35 kDa alanine rich protein
MMARE11_42560	-2.84524	0.000769289	conserved transmembrane transport protein, MmpL5_1
MMARE11_41300	-3.38753	0.000775624	PE-PGRS family protein
MMARE11_35410	-2.0863	0.000780733	peptide synthetase Nrp (peptide synthase)
MMARE11_39790	1.65369	0.000790944	transmembrane serine/threonine-protein kinase H, PknH_1
MMARE11_35970	-2.08552	0.000817329	non-ribosomal peptide synthetase MbtF
MMARE11_51500	-2.81923	0.000889739	PPE family protein
MMARE11_29280	-4.99502	0.000923682	PPE family protein
MMARE11_43410	1.60644	0.000960495	serine protease PepD
MMARE11_15690	1.57157	0.000968324	conserved protein
MMARE11_35990	-2.83776	0.00098672	conserved hypothetical protein
MMARE11_10840	2.27905	0.000988404	60 kDa chaperone (GroEL1)
MMARE11_51270	-4.33549	0.000997034	PE-PGRS family protein
MMARE11_46540	-2.10187	0.00100015	ATP-dependent RNA helicase, RhlE1
MMARE11_26510	1.60879	0.00105256	oxidoreductase
MMARE11_36020	-1.97335	0.00112396	polyketide synthase MbtD
MMARE11_42200	2.28291	0.00119882	conserved hypothetical protein
MMARE11_45450	-4.796	0.0012328	acyl-CoA dehydrogenase
MMARE11_37030	1.49257	0.00123771	conserved hypothetical protein
MMARE11_36040	-1.94276	0.0012573	lysine-N-oxygenase MbtG
MMARE11_51710	1.57666	0.00129902	conserved hypothetical protein
MMARE11_23840	-2.53939	0.00130122	PE-PGRS family protein
MMARE11_07550	-3.57885	0.0013677	PE-PGRS family protein
MMARE11_35030	-2.02612	0.00139131	hypothetical protein
MMARE11_01700	-3.83184	0.00140733	PE-PGRS family protein
MMARE11_42180	-4.74219	0.00140923	PE-PGRS family protein, PE_PGRS9_3
MMARE11_39930	1.68237	0.00141347	conserved hypothetical integral membrane protein
MMARE11_46040	-3.03455	0.00146054	dehydrogenase
MMARE11_52470	-3.95631	0.00146101	conserved hypothetical transmembrane protein
MMARE11_51230	-3.81766	0.00146851	PE-PGRS family protein
MMARE11_35960	-1.90363	0.00152148	phenyloxazoline synthase MbtB
MMARE11_18020	1.43655	0.00174222	ferric uptake regulation protein FurB-like protein
MMARE11_52440	-4.1326	0.00175571	conserved hypothetical transmembrane protein
MMARE11_31500	1.42793	0.00180205	conserved protein
MMARE11_29150	1.60966	0.00184413	GTP cyclohydrolase I FolE_1
MMARE11_34620	-2.22967	0.00186779	PPE family protein, PPE5
MMARE11_08880	1.42498	0.00187037	cytochrome P450 135B4 Cyp135B4
MMARE11_30280	-2.47534	0.00191101	PPE family protein, PPE37
MMARE11_12630	-2.70833	0.0019393	PPE family protein
MMARE11_43380	1.70038	0.00196916	conserved hypothetical membrane protein
MMARE11_46380	-2.67741	0.00198361	lycopene cyclase, CrtYc
MMARE11_35980	-1.85344	0.00199458	non-ribosomal peptide synthetase
MMARE11_38440	-1.84245	0.00200176	transmembrane ATP-binding protein ABC transporter
MMARE11_12700	1.47092	0.00201658	conserved protein
MMARE11_40050	1.42342	0.00209873	conserved membrane protein
MMARE11_23760	1.78422	0.00211818	PE family protein
MMARE11_51270	-4.06322	0.00212492	PE-PGRS family protein
MMARE11_38330	-3.08846	0.00213496	fatty-acid-CoA ligase FadD35_1
MMARE11_25910	1.40786	0.00213903	PPE family protein, PPE26
MMARE11_29510	1.53654	0.00214981	polyprenol-monophosphomannose synthase, Ppm1B
MMARE11_25410	-3.24603	0.0021692	Flavin-binding monooxygenase
MMARE11_12910	1.46341	0.00223966	conserved hypothetical membrane protein
MMARE11_34970	-3.66649	0.00229074	hypothetical protein
MMARE11_26030	1.49607	0.00230832	PPE family protein, PPE31
MMARE11_01820	1.61039	0.00231083	conserved hypothetical protein
MMARE11_41340	-2.56226	0.00232277	PPE family protein
MMARE11_39590	-4.63937	0.00234546	PE-PGRS family protein
MMARE11_38340	-3.34011	0.00238665	fatty-acid-CoA ligase
MMARE11_31560	1.52531	0.00242307	conserved hypothetical integral membrane protein
MMARE11_03660	-3.04654	0.00245164	monooxygenase
MMARE11_21270	1.63659	0.00250258	s-adenosylmethionine synthetase MetK
MMARE11_14760	-4.6093	0.0025168	conserved hypothetical protein
MMARE11_40920	1.52278	0.00257781	low molecular weight T-cell antigen TB8.4
MMARE11_03200	1.41867	0.00259463	conserved protein
MMARE11_38060	-3.4639	0.00262222	cytochrome P450 108B4 Cyp108B4
MMARE11_52490	-4.4778	0.00267347	conserved hypothetical protein
MMARE11_49410	1.66359	0.00267895	EsaT-6 like protein EsxN
MMARE11_52540	-3.61168	0.00268378	conserved hypothetical transmembrane protein
MMARE11_38200	-3.08547	0.00278345	fatty-acid-CoA ligase
MMARE11_44520	-2.37416	0.00283806	8-amino-7-oxononanoate synthase BioF2_1
MMARE11_51830	-3.20362	0.00289303	PE-PGRS family protein
MMARE11_38430	-1.95174	0.00290165	transmembrane ATP-binding protein ABC transporter
MMARE11_29010	1.42643	0.00294005	transcriptional regulatory protein (probably TetR-family)
MMARE11_33280	-3.57791	0.00295618	NADPH:adrenodoxin oxidoreductase FprA
MMARE11_46360	-2.98919	0.00295806	phytoene dehydrogenase CrtI
MMARE11_52120	-2.49376	0.00300114	conserved hypothetical protein
MMARE11_35980	-1.94123	0.0030204	non-ribosomal peptide synthetase MbtE
MMARE11_44250	-3.31255	0.00311775	PE-PGRS family protein
MMARE11_36130	-1.74757	0.00314353	isochorismate synthase MbtI
MMARE11_02050	-3.55288	0.00317344	conserved hypothetical protein
MMARE11_21930	1.35568	0.00319005	conserved hypothetical protein
MMARE11_12130	2.14051	0.00320451	mycobacterial conserved protein, UsfY
MMARE11_28040	-3.67902	0.00321502	MCE-family protein Mce3C
MMARE11_29500	1.65723	0.00324023	conserved hypothetical protein
MMARE11_38420	-2.28839	0.00326352	conserved hypothetical protein
MMARE11_39830	1.39397	0.00330136	conserved hypothetical protein
MMARE11_48420	1.34496	0.00334423	cytochrome P450 125A6 Cyp125A6
MMARE11_32820	-2.03747	0.00336634	conserved hypothetical protein
MMARE11_21690	1.44477	0.00337007	phosphoenolpyruvate carboxylase, Ppc
MMARE11_26890	1.36653	0.00337116	cytochrome P450 140A5 Cyp140A5
MMARE11_40710	-3.15265	0.00338484	nitrite extrusion protein, NarK3_3
MMARE11_21950	1.51787	0.00341622	acyl-CoA dehydrogenase FadE15
MMARE11_02790	-2.46446	0.00345291	monoxygenase
MMARE11_52420	-3.21351	0.00351218	conserved hypothetical membrane protein
MMARE11_30230	1.60194	0.00352989	dihydrolipoamide dehydrogenase Lpd_1
MMARE11_35980	-1.71538	0.00353235	non-ribosomal peptide synthetase
MMARE11_42560	-1.8623	0.00355614	conserved transmembrane transport protein MmpL4_1
MMARE11_52660	1.48465	0.00359154	conserved hypothetical protein
MMARE11_12960	-3.26366	0.00360817	conserved hypothetical alanine and glycine rich protein
MMARE11_52480	-3.20224	0.00363262	conserved hypothetical transmembrane protein
MMARE11_13340	1.69072	0.00372789	conserved ATP-binding protein ABC transporter
MMARE11_52591	-3.85025	0.00375283	conserved hypothetical alanine and glycine rich protein
MMARE11_31160	-3.47914	0.00390432	diphosphomevalonate decarboxylase
MMARE11_40740	-3.32354	0.00396159	glycolipid sulfotransferase
MMARE11_00290	-1.17727	0.0040282	shortchain dehydrogenase
MMARE11_04310	-1.6934	0.00407	peptide synthetase
MMARE11_41360	-2.40969	0.00420758	PE family protein
MMARE11_35440	1.31647	0.00421033	methylase
MMARE11_28880	-2.3081	0.00427091	conserved transmembrane transport protein
MMARE11_36150	1.31935	0.00447673	conserved membrane permease
MMARE11_21790	-2.04788	0.00449703	trehalose-6-phosphate phosphatase OtsB1
MMARE11_08410	1.60581	0.0046674	low-affinity inorganic phosphate transporter, PitA
MMARE11_30210	-1.65827	0.00472193	polyketide synthase Pks6
MMARE11_29950	-2.73548	0.00478207	conserved alanine and proline rich protein
MMARE11_09020	-2.21761	0.00493852	alpha-1,2-mannosidase
MMARE11_10890	-2.38021	0.00500087	PPE family protein
MMARE11_26860	1.29361	0.00511734	conserved hypothetical amidase
MMARE11_29260	-3.5057	0.0051616	PPE family protein
MMARE11_52190	1.38431	0.00516164	conserved hypothetical membrane protein
MMARE11_02320	-3.14043	0.00517695	short-chain type dehydrogenase/reductase
MMARE11_49220	1.67956	0.00535081	endopeptidase ATP binding protein (chain B) ClpB
MMARE11_03990	1.45784	0.00539928	conserved secretory protein
MMARE11_11110	-3.21277	0.00544094	conserved hypothetical protein
MMARE11_01800	1.5076	0.00547718	conserved hypothetical EsxA-like protein, EsxA_2
MMARE11_38850	1.52887	0.00552937	glyoxalase, GloA_1
MMARE11_46980	1.31122	0.00567024	conserved hypothetical protein
MMARE11_24490	-2.62509	0.00581657	acyl-CoA dehydrogenase
MMARE11_07650	1.26923	0.005845	two-component sensory transduction protein RegX3
MMARE11_08580	1.2734	0.00592135	conserved protein
MMARE11_49730	3.698	0.00596476	hypothetical protein
MMARE11_05810	-3.31967	0.00604976	aerobic-type carbon monoxide dehydrogenase, CoxM_3
MMARE11_15540	1.27779	0.00605561	conserved hypothetical protein
MMARE11_45440	-2.49579	0.00605592	cytochrome P450 188A3 Cyp188A3
MMARE11_33860	-3.65968	0.00612528	ketoacyl-acyl carrier protein synthase III
MMARE11_46390	-4.2335	0.00623305	lycopene cyclase, CrtYd
MMARE11_49700	-3.65091	0.00626205	conserved hypothetical protein
MMARE11_28140	1.33977	0.00626913	PE family protein
MMARE11_35270	1.26839	0.00635987	conserved hypothetical protein
MMARE11_51600	-3.06606	0.00641272	PE-PGRS family protein
MMARE11_36050	-1.91487	0.00642753	bifunctional enzyme MbtA: salicyl-AMP ligase (SAL-AMP ligase) + salicyl-S-ACP synthetase
MMARE11_52930	-2.32608	0.00644115	ADP-ribosyltransferse
MMARE11_31750	-3.14575	0.00652666	conserved hypothetical protein
MMARE11_09800	-2.50604	0.0065612	PPE family protein
MMARE11_30210	-2.20249	0.00657197	long-chain acyl-CoA synthetase
MMARE11_50910	1.25089	0.00682702	conserved hypothetical membrane protein
MMARE11_26160	-3.39856	0.00686559	PE-PGRS family protein, PE_PGRS9_1
MMARE11_14030	-2.79215	0.00691403	FAD-dependent oxidoreductase
MMARE11_01670	-2.20779	0.00693442	MCE-family protein Mce6D
MMARE11_38140	-2.86415	0.00697436	fatty-acid-CoA ligase FadD19_2
MMARE11_46520	-3.60653	0.00700196	PE-PGRS family protein
MMARE11_01070	1.25082	0.00704341	conserved hypothetical protein
MMARE11_38170	-3.03193	0.00705818	acyl-CoA dehydrogenase
MMARE11_39580	-2.44897	0.00707364	drug-transport transmembrane ATP-binding protein ABC transporter
MMARE11_38180	-3.24988	0.00729784	acyl-CoA dehydrogenase
MMARE11_19340	1.25362	0.00737138	PE-PGRS family protein
MMARE11_23180	1.52559	0.00744351	histidinol dehydrogenase HisD
MMARE11_01260	-2.2377	0.00745638	acyl-CoA dehydrogenase FadE6_1
MMARE11_36010	-1.89469	0.00757912	polyketide synthase MbtC
MMARE11_46370	-2.76089	0.00758753	phytoene synthase, CrtB
MMARE11_20370	1.24451	0.00766884	pyridoxine biosynthesis protein, SnzP
MMARE11_33850	-3.08431	0.00777431	ketoacyl-acyl carrier protein synthase III
MMARE11_41460	-1.54719	0.00777522	5-methyltetrahydropteroyltriglutamate--homocysteine methyltransferase MetE
MMARE11_26270	1.2287	0.00800309	conserved protein
MMARE11_05680	1.72237	0.00802601	aspartate aminotransferase AspC
MMARE11_52390	-2.47451	0.00812533	conserved hypothetical transmembrane protein
MMARE11_46400	-1.82689	0.00816119	conserved transmembrane transport protein MmpL13_1
MMARE11_01090	-2.92241	0.0081951	cytochrome P450 279A2 Cyp279A2
MMARE11_11300	-2.1279	0.00819569	fatty-acid-CoA ligase FadD29_1
MMARE11_21110	-2.39297	0.00850037	conserved membrane protein
MMARE11_25100	-1.68395	0.00857405	PPE family protein, PPE8
MMARE11_44510	-2.12658	0.00858681	conserved two-domain transmembrane protein
MMARE11_17610	1.83549	0.00874746	soluble secreted antigen Mpt53 precursor
MMARE11_28280	1.34722	0.00879545	hypothetical protein
MMARE11_18650	-3.03882	0.00880827	conserved hypothetical protein
MMARE11_35500	-2.44805	0.00884324	conserved integral membrane transport protein
MMARE11_05880	1.34233	0.00898976	chaperone protein, DnaJ
MMARE11_36030	-2.29408	0.00901821	conserved hypothetical protein MbtH_1
MMARE11_45140	-2.53244	0.00909212	fatty-acid-CoA ligase FadD3_2
MMARE11_37850	-3.16486	0.0091281	coenzyme F420-dependent oxidoreductase
MMARE11_07640	1.2663	0.0091482	two-component sensor histidine kinase SenX3
MMARE11_38100	-2.53028	0.00915142	oxidoreductase
MMARE11_23630	1.64597	0.00928635	iron-regulated conserved protein
MMARE11_35420	-3.4857	0.00938929	conserved hypothetical oxidase
MMARE11_49390	-2.75831	0.00946509	PPE family protein, PPE65
MMARE11_21890	1.36687	0.00949358	conserved protein
MMARE11_25390	1.20053	0.009527	conserved hypothetical protein
MMARE11_03350	-2.04663	0.00955151	PE family protein
MMARE11_46060	-2.03576	0.00958871	conserved hypothetical hydroxylase
MMARE11_46020	-3.00609	0.00961629	dehydrogenase/reductase
MMARE11_01830	1.48998	0.00972155	conserved hypothetical membrane protein
MMARE11_52820	1.40185	0.00976952	conserved hypothetical protein
MMARE11_37910	-2.19759	0.00995292	PPE family protein
MMARE11_04730	1.19661	0.010062	nitrite reductase [NAD(P)H] large subunit [fad flavoprotein] NirB
MMARE11_50450	1.654	0.0100729	aspartate kinase Ask
MMARE11_03250	1.19353	0.0101552	transcriptional regulatory protein (possibly TetR-family)
MMARE11_05820	-2.11821	0.0101705	aerobic-type carbon monoxide dehydrogenase, CoxL_3
MMARE11_18960	1.22917	0.0102145	conserved hypothetical membrane protein
MMARE11_07870	-3.44939	0.0102606	hypothetical protein
MMARE11_23420	1.29415	0.0103983	cutinase Cut1
MMARE11_28060	-2.76923	0.0104243	MCE-family lipoprotein LprM
MMARE11_52400	-2.76867	0.0104397	conserved hypothetical transmembrane protein
MMARE11_42560	-1.51552	0.0104671	conserved transmembrane transport protein-MmpL family
MMARE11_32610	1.18402	0.0104765	cytochrome P450 124A1, Cyp124A1
MMARE11_32780	-2.12327	0.0104907	PPE family protein
MMARE11_17811	-2.88824	0.0105093	PE-PGRS family protein, PE_PGRS
MMARE11_38290	-3.43909	0.0105149	enoyl-CoA hydratase EchA10_1
MMARE11_41660	-2.7646	0.010561	conserved hypothetical alanine and glycine rich protein
MMARE11_38040	-2.57973	0.0105698	zinc-containing alcohol dehydrogenase NAD dependent AdhB_1
MMARE11_07090	2.26271	0.010595	60 kDa chaperonin 2 GroEL2
MMARE11_00860	2.14745	0.0106263	conserved hypothetical MbtH-like protein
MMARE11_01690	-1.943	0.0108111	MCE-family protein Mce6F
MMARE11_47330	-1.59938	0.0108178	serine/threonine-protein kinase PknF_2
MMARE11_08120	-2.1139	0.0108232	glycine-sarcosine methyltransferase
MMARE11_40280	1.26302	0.0108669	alternative RNA polymerase sigma factor SigE
MMARE11_46030	-2.42367	0.0109978	monoxygenase
MMARE11_01640	-1.95401	0.0109992	MCE-family protein Mce6A
MMARE11_52410	-2.70488	0.0110064	PPE family protein
MMARE11_42560	-1.5977	0.0110456	conserved transmembrane transport protein MmpL1
MMARE11_11800	-2.63212	0.0110571	conserved hypothetical 13E12 repeat family protein
MMARE11_12920	-2.7007	0.011138	conserved hypothetical membrane protein
MMARE11_02160	-2.94814	0.0112314	conserved hypothetical secreted protein
MMARE11_38320	-2.50888	0.0112999	long-chain fatty-acid CoA ligase
MMARE11_01320	1.25306	0.0113038	transcriptional regulator
MMARE11_39970	-2.86027	0.0113351	PE-PGRS family protein
MMARE11_02640	4.41266	0.0114545	50S ribosomal protein L31 RpmE_1
MMARE11_44850	1.27952	0.0115135	acyl-CoA dehydrogenase FadE10
MMARE11_02770	-2.2333	0.0115909	dioxygenase
MMARE11_11600	-2.11296	0.0117074	PE-PGRS family protein
MMARE11_47840	-3.39329	0.0117148	phosphate-transport ATP-binding protein ABC transporter PstB
MMARE11_35020	-1.85671	0.0117609	PE-PGRS family protein
MMARE11_10600	-1.89484	0.0118001	conserved membrane protein
MMARE11_37500	-1.84605	0.0119171	Mce family protein, Mce5B
MMARE11_25140	1.3075	0.0120171	hypothetical membrane protein
MMARE11_15000	1.22729	0.0120451	conserved hypothetical protein
MMARE11_02780	-2.66753	0.0122152	monooxygenase
MMARE11_43670	-2.03012	0.0122749	PPE family protein
MMARE11_28070	-2.59047	0.0124517	MCE-family protein Mce3F
MMARE11_51300	-2.21049	0.0124772	acyl-CoA dehydrogenase FadE1_1
MMARE11_37870	-3.03754	0.0126704	acyl-CoA dehydrogenase
MMARE11_14940	-2.10671	0.0126739	conserved hypothetical membrane protein
MMARE11_31140	-2.75704	0.0128983	hydroxymethylglutaryl-coenzyme A (HMG-CoA) reductase
MMARE11_35730	-1.57202	0.0129031	PPE family protein
MMARE11_14040	-3.14424	0.0130667	transcriptional regulatory protein
MMARE11_05800	-3.01669	0.0133187	carbon monoxyde dehydrogenase (small chain), CoxS_3
MMARE11_46080	-3.33709	0.0133609	transcriptional regulatory protein
MMARE11_33150	-1.96738	0.0133795	pyruvate ferredoxin/flavodoxin oxidoreductase family protein
MMARE11_44530	-2.74313	0.0133873	cysteine synthase B CysM
MMARE11_03630	-2.87968	0.0134521	dehydrogenase
MMARE11_45500	-1.90367	0.0134984	membrane-associated phospholipase C 2 PlcB_3
MMARE11_14020	-3.32864	0.0136387	conserved hypothetical protein
MMARE11_45320	-2.30838	0.0136777	MCE-family lipoprotein
MMARE11_26985	-3.32198	0.0138279	hypothetical protein
MMARE11_15220	-2.48609	0.0138832	conserved hypothetical membrane protein
MMARE11_46940	1.41497	0.0139287	UDP-glucose-4-epimerase, CpsY
MMARE11_01781	1.16037	0.0141677	conserved hypothetical EsxA-like protein, EsxA_3
MMARE11_37080	-2.08826	0.0142574	drug-transport integral membrane protein
MMARE11_45850	-1.9128	0.0143177	acyl-CoA transferase
MMARE11_28940	-2.77176	0.0143488	conserved hypothetical sugar transport protein
MMARE11_29140	2.61077	0.0143581	molecular chaperone (small heat shock protein)
MMARE11_26610	1.14029	0.0143756	conserved hypothetical membrane protein
MMARE11_52970	-1.60825	0.0144881	conserved hypothetical protein
MMARE11_17820	-2.065	0.0145239	8-amino-7-oxononanoate synthase BioF2_3
MMARE11_17980	1.2279	0.0146448	nickel/iron-hydrogenase I small subunit, HyaA
MMARE11_46860	-1.9863	0.014732	transposase for ISMyma06
MMARE11_11180	-1.7729	0.0147512	DNA polymerase III, alpha chain, DnaE2
MMARE11_19320	1.26391	0.0147887	conserved hypothetical protein
MMARE11_52530	-2.46346	0.0148078	conserved hypothetical transmembrane protein
MMARE11_08640	-1.39203	0.0148187	transmembrane carbonic anhydrase, SulP_1
MMARE11_10580	-2.41598	0.0148406	membrane-anchored serine protease (mycosin), MycP4
MMARE11_26710	1.13223	0.0148717	conserved protein
MMARE11_36000	-1.89255	0.0148764	thioesterase
MMARE11_19300	1.39153	0.0149205	conserved membrane protein
MMARE11_27970	-2.69929	0.015049	cytochrome P450 278A1 Cyp278A1
MMARE11_08530	1.26021	0.0151833	mannosyltransferase, PimB
MMARE11_40750	-2.58796	0.0151936	conserved hypothetical membrane protein
MMARE11_06550	-1.59053	0.0152268	fatty acyl-AMP ligase FadD30
MMARE11_39680	-2.83028	0.0152849	citrate (pro-3s)-lyase (beta subunit) CitE_1
MMARE11_14920	-2.06455	0.0153928	conserved hypothetical protein
MMARE11_02730	-2.06437	0.0154018	acyl-CoA synthetase
MMARE11_14780	-3.07585	0.0154368	conserved hypothetical methyltransferase
MMARE11_46090	-2.20451	0.0154617	dehydrogenase
MMARE11_19030	-2.17197	0.0155324	methylthioadenine synthetase, MiaB
MMARE11_31200	-2.30927	0.0155424	terpene cyclase
MMARE11_16140	1.14456	0.0157243	methyltransferase
MMARE11_42140	1.5942	0.0157313	conserved hypothetical transmembrane protein
MMARE11_26980	1.30794	0.0157954	secreted antigen 85-B FbpB
MMARE11_01580	-2.39322	0.0158427	ATP-binding protein ABC transporter
MMARE11_29210	-2.81603	0.0158614	conserved hypothetical membrane protein
MMARE11_11550	-1.79747	0.0159971	PE-PGRS family protein, PE_PGRS9_4
MMARE11_01840	1.38481	0.0161396	conserved hypothetical protein
MMARE11_46220	-2.93926	0.0161858	acyl-CoA dehydrogenase
MMARE11_42560	-1.48206	0.0162385	conserved transmembrane transport protein, MmpL5_3
MMARE11_23850	1.1862	0.0163239	N-acetyl-gamma-glutamyl-phosphate reductase ArgC
MMARE11_37900	-2.15526	0.016361	fatty-acid-CoA ligase
MMARE11_36650	-3.05216	0.0163709	PE-PGRS family protein
MMARE11_41670	-3.78298	0.0163733	conserved hypothetical protein
MMARE11_27820	-2.55962	0.0164032	acyl-CoA dehydrogenase FadE17
MMARE11_10830	1.42357	0.0165049	10 kDa chaperone (GroES)
MMARE11_17410	-2.80017	0.0165192	conserved hypothetical membrane protein
MMARE11_36460	1.11303	0.0165775	conserved hypothetical membrane protein
MMARE11_03570	-3.64521	0.0167653	conserved hypothetical protein
MMARE11_42560	-1.6429	0.0168135	conserved transmembrane transport protein MmpL5_2
MMARE11_12000	-1.65011	0.0168691	arylsulfatase AtsB (aryl-sulfate sulphohydrolase)
MMARE11_38210	-2.47993	0.0169455	conserved hypothetical metal-dependent hydrolase
MMARE11_52310	-1.58738	0.0169709	conserved hypothetical secreted protein
MMARE11_38220	-3.03494	0.0170302	enoyl-CoA hydratase, EchA12_1
MMARE11_05900	-1.36401	0.0170717	PPE family protein
MMARE11_28330	-1.85001	0.0171726	conserved hypothetical hydrolase or acyltransferase
MMARE11_22160	1.11401	0.017212	conserved hypothetical secreted protein
MMARE11_41710	-1.95645	0.0173665	conserved hypothetical alanine and proline rich protein
MMARE11_47310	-1.82885	0.0174401	molybdopterin biosynthesis protein MoeY_1
MMARE11_45420	-2.77816	0.0174515	3-oxoacyl-[acyl-carrier protein] reductase
MMARE11_08800	-2.19085	0.0177319	transcriptional regulatory protein EmbR_2
MMARE11_28640	1.24527	0.0177566	conserved protein
MMARE11_37960	-1.97609	0.0177834	PPE family protein, PPE2
MMARE11_07340	-1.8372	0.0179153	8-amino-7-oxononanoate synthase BioF2_4
MMARE11_52550	-2.45703	0.0180402	conserved hypothetical transmembrane protein
MMARE11_38280	-3.20523	0.018061	conserved hypothetical protein
MMARE11_14050	-2.89418	0.0180747	acetaldehyde dehydrogenase, MhpF
MMARE11_35000	-1.72689	0.0180749	EsaT-6 like protein EsxK
MMARE11_33760	-1.51615	0.0180749	PPE family protein, PPE51_3
MMARE11_09030	-1.40191	0.0181963	conserved integral membrane protein
MMARE11_08770	-1.84116	0.0182161	PPE family protein
MMARE11_33450	1.11809	0.0182704	transcriptional regulatory protein (probably TetR-family)
MMARE11_00820	-1.56398	0.0182787	integral membrane efflux protein ErmB
MMARE11_42560	-1.37942	0.0183026	conserved transmembrane transport protein, MmpL
MMARE11_37770	-2.11828	0.0183383	conserved hypothetical membrane protein
MMARE11_39710	-2.02686	0.0183426	acyl-CoA dehydrogenase FadE3
MMARE11_19570	-2.20939	0.0183634	PE-PGRS family protein
MMARE11_40800	-1.3782	0.0185414	PPE family protein
MMARE11_35410	-1.33985	0.0186448	peptide synthetase Nrp (peptide synthase)
MMARE11_29800	-1.96913	0.0187065	conserved hypothetical secreted protein
MMARE11_00400	-3.71508	0.0187367	transcriptional regulatory protein (Whib-like), WhiB5
MMARE11_33800	-2.87603	0.0188515	conserved hypothetical secreted protein
MMARE11_42560	-1.48915	0.0188677	conserved transmembrane transport protein MmpL1_1
MMARE11_35980	-1.66623	0.0188838	non-ribosomal peptide synthetase
MMARE11_47850	-1.71421	0.0190798	conserved transmembrane transport protein MmpL family
MMARE11_50440	1.36753	0.0192203	aspartate-semialdehyde dehydrogenase Asd
MMARE11_32230	-2.98277	0.0192674	pyruvate dehydrogenase E1 component (beta subunit)
MMARE11_42560	-1.34951	0.0194778	conserved transmembrane transport protein-MmpL family
MMARE11_32540	-2.73317	0.0195726	apolipoprotein n-acyltransferase, Lnt
MMARE11_06410	-2.7316	0.0196429	gamma-butyrobetaine hydroxylase, TauD_1
MMARE11_21900	1.33765	0.0196572	conserved ATP-binding protein ABC transporter
MMARE11_34990	-1.63348	0.0196616	PPE family protein
MMARE11_15120	-2.49109	0.0196781	O-methyltransferase
MMARE11_14010	-2.65001	0.01968	conserved hypothetical protein
MMARE11_42580	-2.09316	0.019794	hypothetical protein
MMARE11_29030	1.11121	0.0198148	20-beta-hydroxysteroid dehydrogenase FabG3_1
MMARE11_01340	-2.72742	0.0198309	conserved hypothetical secreted protein
MMARE11_11140	1.089	0.0199132	conserved lipoprotein, LpqD
MMARE11_19080	1.26089	0.0199958	conserved hypothetical membrane protein
MMARE11_14595	-3.55466	0.0200615	conserved secreted protein
MMARE11_28870	-1.65159	0.0201496	conserved hypothetical oxidoreductase
MMARE11_31170	-3.54913	0.0203264	mevalonate kinase, Erg12
MMARE11_37760	-2.17472	0.020413	cytochrome P450 269A1 Cyp269A1
MMARE11_44860	1.09186	0.0204627	cold shock-like protein B CspB
MMARE11_39590	-1.95745	0.0204963	PE-PGRS family protein
MMARE11_25190	-2.30119	0.0205644	conserved hypothetical protein
MMARE11_46860	-1.84483	0.0206403	transposase for ISMyma06
MMARE11_38150	-2.51552	0.0206432	cytochrome P450 187A5 Cyp187A5
MMARE11_50300	-2.63054	0.0206974	PE-PGRS family protein, PE_PGRS9_2
MMARE11_43190	-1.94966	0.0210056	glycosyltransferase
MMARE11_19050	1.26625	0.0210625	conserved protein
MMARE11_01270	-2.29181	0.0210983	conserved hypothetical protein
MMARE11_38000	-2.0257	0.0211801	acyl-CoA dehydrogenase
MMARE11_35300	1.19607	0.0212228	conserved hypothetical protein
MMARE11_01660	-1.76653	0.0214846	MCE-family protein Mce6C
MMARE11_23860	1.10105	0.0216368	glutamate N-acetyltransferase ArgJ
MMARE11_51790	-1.65839	0.021642	conserved hypothetical membrane protein
MMARE11_44660	-1.68484	0.0216467	monooxygenase
MMARE11_51660	-2.27978	0.0218127	conserved hypothetical protein
MMARE11_45820	-2.03089	0.0218863	short-chain type dehydrogenase/reductase
MMARE11_45200	-2.15072	0.0218933	cytochrome P450 150A6 Cyp150A6
MMARE11_02860	1.15076	0.0220102	conserved hypothetical secreted protein
MMARE11_08270	1.90388	0.0222232	conserved hypothetical membrane protein
MMARE11_41690	-2.92005	0.0222493	conserved hypothetical protein
MMARE11_34020	-2.60111	0.022269	pyruvate dehydrogenase E1 component (beta subunit)
MMARE11_37990	-1.94331	0.0225951	acyl-CoA dehydrogenase
MMARE11_40720	-2.22177	0.0226855	monophosphatase CysQ-like protein
MMARE11_21880	1.45545	0.0229099	conserved protein
MMARE11_28030	-2.66829	0.0229718	MCE-family protein Mce3B
MMARE11_01750	1.42972	0.0229793	PPE family protein
MMARE11_18650	-2.43035	0.0230646	conserved hypothetical protein
MMARE11_52830	1.38556	0.0232619	Esx-1 secreted protein, EspB
MMARE11_45780	-1.4762	0.0235538	integral membrane transporter
MMARE11_21950	1.74831	0.0236353	acyl-CoA dehydrogenase FadE5
MMARE11_32640	-2.41655	0.0238989	conserved hypothetical membrane protein
MMARE11_24510	-1.86839	0.0239832	conserved hypothetical protein
MMARE11_01250	-2.02911	0.0240007	conserved hypothetical protein
MMARE11_03580	-2.02897	0.0240107	conserved hypothetical protein
MMARE11_41390	-2.15883	0.0240521	aldehyde dehydrogenase NAD dependent AldA_2
MMARE11_02260	-2.2409	0.0242904	PE-PGRS family protein
MMARE11_47320	-2.11331	0.0243844	conserved hypothetical protein
MMARE11_15950	-1.93493	0.0244173	penicillin-binding protein
MMARE11_12480	0.951196	0.024444	transcriptional regulatory protein Whib-like WhiB2
MMARE11_11130	1.04925	0.0245308	short-chain dehydrogenase, AcrA1
MMARE11_19440	1.04955	0.02461	conserved hypothetical protein
MMARE11_03620	-1.99071	0.0247134	cytochrome P450 191A3 Cyp191A3
MMARE11_01680	-1.85709	0.0248414	MCE-family lipoprotein Mce6E
MMARE11_01590	-1.86768	0.0250394	conserved membrane protein
MMARE11_50150	-2.21605	0.0250446	integral membrane transport protein
MMARE11_43400	1.08055	0.0252236	pterin-4-alpha-carbinolamine dehydratase MoaB2
MMARE11_05860	1.46416	0.0252404	chaperone protein DnaK
MMARE11_42530	-1.86264	0.0254346	dehydrogenase fad flavoprotein Gmc oxidoreductase
MMARE11_29740	-1.33074	0.0256872	RNA polymerase sigma factor, SigC
MMARE11_17390	-3.54374	0.0258463	conserved hypothetical protein
MMARE11_02040	-1.95907	0.025916	conserved hypothetical protein
MMARE11_06540	-2.13105	0.0259582	conserved membrane protein MmpS1_1
MMARE11_07190	-2.85246	0.0259708	conserved hypothetical protein
MMARE11_06610	-2.3149	0.0263235	conserved hypothetical protein
MMARE11_49410	1.04204	0.0263319	EsaT-6 like protein EsxN_3
MMARE11_28350	1.12105	0.0263795	catalase-peroxidase-peroxynitritase T KatG
MMARE11_08190	-1.96481	0.0267011	amino acid permease
MMARE11_36420	-2.24377	0.0271072	conserved hypothetical membrane metal-binding protein ComEC
MMARE11_05270	-2.19972	0.0271585	carbohydrate kinase
MMARE11_26700	1.57344	0.0273104	conserved hypothetical protein
MMARE11_28050	-2.40322	0.0275102	MCE-family protein Mce3D
MMARE11_01360	1.03267	0.0275431	acyl-CoA dehydrogenase FadE25_2
MMARE11_44320	1.05818	0.0275472	conserved hypothetical protein
MMARE11_06200	1.045	0.0276022	Mg2+ transport transmembrane protein MgtE
MMARE11_36640	-1.42356	0.0276334	adenylate or guanylate cyclase
MMARE11_35570	1.34538	0.0276517	conserved hypothetical protein
MMARE11_21870	1.2089	0.0277926	transcriptional regulatory protein
MMARE11_42610	1.22307	0.0278076	hypothetical membrane protein
MMARE11_06400	-1.85628	0.0280548	conserved hypothetical protein
MMARE11_33350	-1.83058	0.02808	PE family protein
MMARE11_42970	-2.14416	0.0281266	cytochrome P450 135B3 Cyp135B3
MMARE11_52520	-2.39392	0.0281495	conserved hypothetical transmembrane protein
MMARE11_35980	-1.4318	0.0282127	non-ribosomal peptide synthetase
MMARE11_30210	-1.33925	0.0282603	polyketide synthase Pks9
MMARE11_44460	-1.25477	0.0283508	metal cation transporter ATPase p-type CtpE
MMARE11_27900	-1.23852	0.0283549	conserved hypothetical membrane protein
MMARE11_01630	-1.97139	0.0284387	conserved hypothetical integral membrane protein YrbE6B
MMARE11_07840	-1.33132	0.0285447	carbon monoxyde dehydrogenase (medium chain), CoxM_1
MMARE11_33010	-1.83228	0.0287034	conserved hypothetical protein
MMARE11_28360	1.2709	0.0287162	ferric uptake regulation protein FurA
MMARE11_19960	-3.36304	0.0290802	PE-PGRS family protein
MMARE11_03240	-1.84442	0.0290818	conserved protein
MMARE11_48090	-2.17381	0.0291252	PE-PGRS family protein
MMARE11_28880	-1.63646	0.0293184	conserved transmembrane transport protein
MMARE11_41720	-2.37669	0.029377	conserved hypothetical alanine and proline rich protein
MMARE11_22730	-1.2532	0.0294453	glycosyl transferase
MMARE11_03270	1.01706	0.0297415	O-Methyltransferase
MMARE11_29120	1.80366	0.0297457	conserved protein
MMARE11_10500	1.04013	0.02993	D-serine/D-alanine/glycine transporter, CycA
MMARE11_09330	-1.45691	0.0299737	amidase, AmiD
MMARE11_45460	-2.26457	0.0299823	acyl-CoA dehydrogenase
MMARE11_52560	-2.78606	0.0300795	conserved hypothetical protein
MMARE11_26300	-2.96717	0.030339	PE-PGRS family protein, PE_PGRS34_1
MMARE11_34540	-1.40077	0.0305871	conserved hypothetical membrane protein
MMARE11_01787	1.05077	0.0309478	hypothetical protein
MMARE11_08690	-1.21705	0.0311163	lantibiotic modifying enzyme
MMARE11_21570	-1.58259	0.0312444	PE-PGRS family protein, PE16
MMARE11_38300	-2.46172	0.0313518	enoyl-CoA hydratase EchA11_1
MMARE11_49710	-2.40951	0.0314094	conserved hypothetical protein
MMARE11_49680	-3.43471	0.0314864	conserved hypothetical alanine-rich membrane protein
MMARE11_48620	-1.3504	0.0315605	PPE family protein
MMARE11_41430	-1.49229	0.031623	transcriptional regulatory protein (probably TetR-family)
MMARE11_47310	-1.21785	0.0317187	molybdopterin biosynthesis protein, MoeY
MMARE11_33700	-1.66871	0.0317459	conserved hypothetical protein
MMARE11_20750	1.03889	0.0319366	conserved hypothetical protein
MMARE11_32460	1.00333	0.0319501	conserved hypothetical protein
MMARE11_03610	-2.18055	0.0319663	conserved hypothetical protein
MMARE11_22400	-1.36289	0.0319942	conserved hypothetical protein
MMARE11_18470	-1.40709	0.0320202	acyl-CoA dehydrogenase FadE21
MMARE11_47120	1.0169	0.0320954	conserved hypothetical regulatory protein
MMARE11_34390	-1.41533	0.0322332	transcriptional regulatory protein (LuxR-family)
MMARE11_01570	-2.17461	0.0324662	conserved membrane protein
MMARE11_38270	-1.88232	0.0324989	enoyl-CoA hydratase, EchA4_2
MMARE11_43960	-1.24446	0.0325717	divalent cation-transport integral membrane protein MntH
MMARE11_51170	-2.12704	0.0329182	osmoprotectant (glycine betaine/carnitine/choline/L-proline) transport integral membrane protein ABC transporter ProW
MMARE11_38310	-2.63641	0.0329592	enoyl-CoA hydratase EchA16_1
MMARE11_01550	-1.76442	0.0330196	conserved protein
MMARE11_38130	-2.63258	0.0332138	conserved hypothetical protein
MMARE11_18130	-1.62395	0.0332622	cobyrinic acid a,C-diamide synthase CobB
MMARE11_14730	-2.43632	0.0333317	conserved hypothetical protein
MMARE11_35390	-1.51723	0.0334968	tryptophan halogenase
MMARE11_43280	-2.21865	0.033699	glycosyl transferase
MMARE11_16290	1.09233	0.0337742	acetolactate synthase (large subunit) IlvB1
MMARE11_47890	0.994567	0.0337786	conserved hypothetical secreted protein
MMARE11_21350	1.02155	0.0337946	transcriptional regulatory protein
MMARE11_13840	0.993571	0.0341453	PPE family protein
MMARE11_52380	-1.93521	0.0342187	conserved hypothetical membrane protein
MMARE11_42570	-1.42485	0.034219	cytochrome P450 138B1 Cyp138B1
MMARE11_13450	-1.80554	0.0343154	transcriptional regulatory protein
MMARE11_45930	-1.40746	0.034357	transcriptional regulatory protein (LuxR-family)
MMARE11_42560	-1.37116	0.0351373	conserved transmembrane transport protein, MmpL5_5
MMARE11_38080	-2.48861	0.0351836	Dehydrogenase/decarboxylase protein
MMARE11_30040	1.0296	0.0352034	conserved protein
MMARE11_14360	-1.97942	0.0354879	conserved hypothetical protein
MMARE11_16310	1.11537	0.0355349	ketol-acid reductoisomerase IlvC
MMARE11_23410	1.1025	0.0355629	conserved hypothetical membrane protein
MMARE11_37860	-2.48367	0.0356292	acyl-CoA dehydrogenase
MMARE11_05050	-1.29287	0.0356687	conserved protein
MMARE11_16890	-1.17671	0.0356738	daunorubicin-DIM-transport integral membrane protein ABC transporter DrrC
MMARE11_05280	-1.75134	0.0356914	mannitol dehydrogenase
MMARE11_27980	-3.35998	0.0357625	conserved hypothetical protein
MMARE11_07180	-1.97348	0.0360673	cyclopropane-fatty-acyl-phospholipid synthase UfaA1
MMARE11_22610	-1.43117	0.0361483	SAM-dependent methyltransferase
MMARE11_28490	-2.25143	0.0361837	PPE family protein
MMARE11_01150	-1.88637	0.0362937	oxidoreductase
MMARE11_34040	-2.8743	0.036304	conserved hypothetical protein
MMARE11_46130	1.1575	0.0363603	two-component sensor kinase
MMARE11_25900	1.84532	0.0363696	PE family protein, PE19_1
MMARE11_28570	-1.51001	0.0365062	fatty-acid-CoA ligase FadD9_1
MMARE11_27040	1.21264	0.0365368	conserved hypothetical membrane protein
MMARE11_45500	-1.52177	0.0365698	membrane-associated phospholipase C 2 PlcB_6
MMARE11_27950	-1.75149	0.036618	aldehyde dehydrogenase
MMARE11_14800	-1.85533	0.03671	conserved hypothetical membrane protein
MMARE11_44690	-1.51954	0.0368345	conserved hypothetical exported protein
MMARE11_46280	-1.74767	0.0370361	methylmalonyl-CoA mutase beta subunit, McmA2a
MMARE11_05290	-2.46496	0.0372108	PE-PGRS family protein
MMARE11_45700	-1.73544	0.0374208	metal-dependent amidohydrolase
MMARE11_31130	-1.99776	0.0374289	hydroxymethylglutaryl-coenzyme A synthase, PksG
MMARE11_32480	0.99446	0.0379275	conserved hypothetical protein
MMARE11_14320	-1.71787	0.037971	conserved hypothetical protein
MMARE11_04350	-1.67439	0.0380852	methyltransferase
MMARE11_43000	-2.0703	0.0381733	dehydrogenase
MMARE11_03650	-2.67382	0.0384157	short chain dehydrogenase
MMARE11_39710	-1.54523	0.0384272	acyl-CoA dehydrogenase FadE3_2
MMARE11_33980	1.44872	0.0384712	hypothetical protein
MMARE11_26440	1.80412	0.0385051	urease beta subunit UreB
MMARE11_45470	-3.20577	0.0386348	conserved hypothetical protein
MMARE11_01540	-1.38855	0.0388054	glutamate decarboxylase
MMARE11_45210	-3.30775	0.0389871	hypothetical protein
MMARE11_32620	1.01461	0.0394874	flavin-containing monoamine oxidase AofH_1
MMARE11_22450	-1.22315	0.039493	conserved hypothetical transmembrane protein
MMARE11_27310	-1.61062	0.039709	conserved hypothetical protein
MMARE11_49430	-2.05134	0.0400777	PPE family protein
MMARE11_45720	-1.60704	0.0401355	dioxygenase
MMARE11_13260	-1.46656	0.0404776	ATP-dependent DNA helicase
MMARE11_46690	-1.78353	0.0406601	phosphate-transport integral membrane ABC transporter, PstA
MMARE11_40770	-1.6944	0.0407012	conserved hypothetical protein
MMARE11_39440	1.03533	0.0408255	conserved hypothetical protein
MMARE11_28080	-2.64203	0.0410438	conserved Mce associated membrane protein
MMARE11_28830	-1.89543	0.0412642	Zn-dependent alcohol dehydrogenase
MMARE11_16720	-1.15181	0.0412928	formyltetrahydrofolate deformylase PurU
MMARE11_47210	0.998339	0.0413134	Zn-dependent alcohol dehydrogenase, AdhX
MMARE11_14630	-1.61316	0.0413616	PPE family protein
MMARE11_40150	-1.45308	0.0414195	sugar-transport ATP-binding protein ABC transporter SugC
MMARE11_47220	0.960914	0.04159	aldehyde dehydrogenase
MMARE11_04110	-1.20648	0.041813	conserved hypothetical protein
MMARE11_32810	-2.3361	0.0418374	transposase, ISMyma01_aa1-like protein
MMARE11_15800	-1.5928	0.0418928	formate hydrogenase HycE
MMARE11_36680	0.954166	0.041954	cytochrome P450 268A2 Cyp268A2
MMARE11_34830	0.956732	0.0419571	conserved hypothetical proline-rich protein
MMARE11_50890	-1.73559	0.0420793	multi-functional enzyme with acyl-CoA-reductase activity AcrA1_1
MMARE11_31570	1.27965	0.0421462	branched-chain amino acid transaminase IlvE
MMARE11_41410	-3.25364	0.0425185	hypothetical protein
MMARE11_00440	-1.69191	0.0425312	conserved hypothetical protein
MMARE11_45590	-1.71378	0.0428336	3-ketoacyl-CoA thiolase
MMARE11_44990	0.958157	0.042842	conserved protein
MMARE11_09980	-1.38641	0.0435471	arylsulfatase AtsA_1
MMARE11_15020	-2.26957	0.0436007	conserved hypothetical membrane protein
MMARE11_46250	-1.9751	0.0439578	acyl-CoA transferase
MMARE11_25960	1.03884	0.0439742	conserved protein
MMARE11_33840	-1.75553	0.0440132	haloalkane dehalogenase
MMARE11_12940	-2.26656	0.0440241	conserved hypothetical protein
MMARE11_27640	-1.40291	0.0444434	metal-dependent hydrolase
MMARE11_22410	-1.16075	0.0444721	conserved hypothetical transmembrane protein
MMARE11_32790	-1.55016	0.0445347	PPE family protein
MMARE11_35140	-1.76967	0.0447882	conserved hypothetical protein
MMARE11_32220	-1.72735	0.0450435	hypothetical protein
MMARE11_12950	-2.28845	0.0451994	conserved hypothetical alanine rich protein
MMARE11_33790	-1.13984	0.0452947	PE family protein
MMARE11_19210	1.02243	0.0454306	conserved hypothetical hydrolase
MMARE11_37490	-1.54293	0.0455095	Mce protein, Mce5A
MMARE11_47810	-1.67672	0.0455706	8-amino-7-oxononanoate synthase BioF2
MMARE11_49570	-2.15501	0.0456441	PE-PGRS family protein, PE_PGRS15
MMARE11_26290	-1.1549	0.0456736	glycine dehydrogenase GcvB_1
MMARE11_42330	-1.59528	0.0457249	conserved protein
MMARE11_45310	-1.56248	0.0458713	MCE-family protein
MMARE11_43150	-1.43236	0.0460415	PPE family protein
MMARE11_40330	-1.55275	0.0461111	tetronasin-transport integral membrane protein ABC transporter
MMARE11_05890	0.979276	0.0463995	heat shock protein transcriptional repressor HspR (MerR family)
MMARE11_11430	1.0493	0.046499	methyltransferase
MMARE11_10360	1.07986	0.0465106	methylmalonate semialdehyde dehydrogenase, MmsA
MMARE11_03340	-1.48269	0.0466444	PE family protein
MMARE11_44290	-1.52753	0.0467663	PPE family protein
MMARE11_22000	0.950258	0.0468023	enoyl-CoA hydratase, EchA12
MMARE11_02280	-1.7655	0.0471762	methyltransferase/methylase
MMARE11_42560	-1.14258	0.0471816	conserved transmembrane transport protein MmpL4_5
MMARE11_52960	-1.59443	0.047213	lipoprotein LppJ
MMARE11_01300	1.31825	0.047488	conserved hypothetical protein
MMARE11_46210	-1.86886	0.0476751	acyl-CoA dehydrogenase
MMARE11_29890	0.930861	0.0476773	conserved hypothetical protein
MMARE11_01650	-1.61658	0.0479082	MCE-family protein Mce6B
MMARE11_17990	0.934049	0.047913	nickel cation-binding GTPase, HypB
MMARE11_33070	1.16451	0.047954	maleate cis-trans isomerase
MMARE11_31150	-2.17249	0.0480589	phosphomevalonate kinase
MMARE11_25440	-1.42804	0.048368	fatty-acid-CoA ligase FadD1
MMARE11_05020	-1.10756	0.048617	PPE family protein, PPE4
MMARE11_43170	-1.50589	0.0487377	conserved hypothetical membrane protein
MMARE11_21160	-1.09055	0.0488834	pyrimidine operon regulatory protein PyrR
MMARE11_01610	-1.44677	0.0490717	polyketide synthase Pks16_1
MMARE11_03600	-2.55575	0.0490791	conserved hypothetical protein
MMARE11_28560	-1.80345	0.0490853	conserved hypothetical protein
MMARE11_07400	-1.14506	0.049225	transcriptional regulatory protein
MMARE11_45610	-1.66436	0.0493324	cytochrome P450 190A3 Cyp190A3
MMARE11_50740	1.14526	0.0494077	conserved protein
MMARE11_43010	-1.92886	0.0494264	alternative RNA polymerase sigma factor
MMARE11_19310	1.06384	0.0495045	conserved hypothetical protein
MMARE11_45970	-1.39702	0.0495911	cysteine synthase a CysK2

## Sheet: E11_E11_INT (S5)
Complete list of genes of which expression is significantly changed in M. marinum wild-type strain during infection of macrophages vs growth in 7H9 culture medium. P<0.05
Gene ID	foldChange	log2FoldChange	pval	Product
MMARE11_35620	0.0350916	-4.83273	8.69e-12	EsaT-6 like protein EsxP_2"
MMARE11_46400	0.0364238	-4.77898	1.95e-10	conserved transmembrane transport protein
MMARE11_46360	0.019619	-5.6716	1.32e-09	phytoene dehydrogenase CrtI"
MMARE11_46350	0.0122847	-6.34699	1.91e-09	geranylgeranyl pyrophosphate synthase CrtE"
MMARE11_35630	0.0312808	-4.99858	2.37e-09	conserved hypothetical protein"
MMARE11_52750	0.111793	-3.1611	3.5e-09	Esat-6 like protein EsxB"
MMARE11_08940	0.0268003	-5.22161	3.76e-09	conserved hypothetical protein"
MMARE11_35610	0.0777065	-3.68582	3.8e-09	EsaT-6 like protein EsxN_3"
MMARE11_49940	0.0555432	-4.17025	4.89e-09	transcriptional regulatory protein Whib-like
MMARE11_01780	0.0969223	-3.36703	7.15e-09	conserved hypothetical EsxB-like protein,
MMARE11_29140	7.31772	2.87139	1.02e-08	molecular chaperone (small heat shock protein)"
MMARE11_52760	0.147869	-2.7576	1.65e-08	6 kDa early secretory antigenic target EsxA
MMARE11_51340	0.0753581	-3.73009	5.97e-08	19 kDa lipoprotein antigen precursor LpqH"
MMARE11_46370	0.0251998	-5.31044	8.71e-08	phytoene synthase, CrtB"
MMARE11_52830	0.131843	-2.92311	1.05e-07	Esx-1 secreted protein, EspB"
MMARE11_42680	0.0983439	-3.34602	1.37e-07	EsaT-6 like protein EsxP"
MMARE11_01750	0.144204	-2.79382	1.44e-07	PPE family protein"
MMARE11_13670	0.079031	-3.66144	1.68e-07	PPE family protein"
MMARE11_03730	0.121832	-3.03704	1.99e-07	conserved hypothetical integral membrane protein
MMARE11_12800	48.8303	5.60971	3.02e-07	oxidoreductase"
MMARE11_06730	0.144112	-2.79474	3.98e-07	conserved hypothetical membrane protein"
MMARE11_52330	0.0948974	-3.39749	4.86e-07	conserved hypothetical protein"
MMARE11_37690	0.208156	-2.26426	4.97e-07	fatty acid synthase Fas"
MMARE11_46380	0.0127027	-6.29872	6.46e-07	lycopene cyclase, CrtYc"
MMARE11_01770	0.0863346	-3.53392	7.16e-07	6 kDa culture filtrate antigen EsxA_1 (early
MMARE11_04850	0.127353	-2.97309	8.48e-07	fatty-acid-CoA ligase FadD2"
MMARE11_16810	0.200399	-2.31906	8.73e-07	polyketide synthase Pks15/1"
MMARE11_14280	0.0717072	-3.80174	1.09e-06	conserved hypothetical membrane protein"
MMARE11_06740	0.158489	-2.65755	1.16e-06	conserved hypothetical membrane protein"
MMARE11_03770	0.188464	-2.40764	2.33e-06	MCE-family protein Mce1C"
MMARE11_12810	69.7061	6.12321	2.9e-06	linoleoyl-CoA desaturase, DesA3"
MMARE11_28350	0.119187	-3.06871	3.13e-06	catalase-peroxidase-peroxynitritase T KatG"
MMARE11_03740	0.173139	-2.52999	3.21e-06	conserved hypothetical integral membrane protein
MMARE11_51880	0.14301	-2.80581	3.51e-06	secreted Mpt51/Mpb51 antigen protein FbpD"
MMARE11_29170	0.100804	-3.31038	3.71e-06	ferredoxin FdxA_2"
MMARE11_12650	0.191635	-2.38357	3.73e-06	two-component sensory transduction
MMARE11_09660	0.275583	-1.85944	4.4e-06	iron-regulated elongation factor Ef-tu, Tuf"
MMARE11_35710	0.069514	-3.84655	6.44e-06	PPE family protein"
MMARE11_35720	0.069514	-3.84655	6.56e-06	PPE family protein"
MMARE11_35670	0.121639	-3.03932	7.03e-06	EsaT-6 like protein EsxN_4"
MMARE11_35680	0.121639	-3.03932	7.04e-06	EsaT-6 like protein EsxN_5"
MMARE11_51810	0.0193048	-5.6949	7.15e-06	conserved hypothetical membrane protein"
MMARE11_09470	0.273402	-1.8709	7.42e-06	DNA-directed RNA polymerase, beta chain, RpoC"
MMARE11_52660	0.190815	-2.38975	8.9e-06	conserved hypothetical protein"
MMARE11_10070	0.169873	-2.55747	1.04e-05	50S ribosomal protein L6, RplF"
MMARE11_35690	0.0468779	-4.41495	1.2e-05	EsaT-6 like protein EsxP_3"
MMARE11_35700	0.0468779	-4.41495	1.26e-05	EsaT-6 like protein EsxP_4"
MMARE11_42690	0.074898	-3.73893	1.26e-05	EsaT-6 like protein EsxN_1"
MMARE11_20170	0.0528014	-4.24328	1.33e-05	conserved hypothetical protein"
MMARE11_34620	0.115865	-3.10948	1.38e-05	PPE family protein, PPE5"
MMARE11_16470	0.198	-2.33643	1.52e-05	DNA-binding protein Hu, HupB"
MMARE11_39000	0.253487	-1.98002	1.67e-05	ATP synthase delta chain AtpH"
MMARE11p_00900	25.481	4.67135	1.71e-05	hypothetical protein"
MMARE11_49220	0.282694	-1.82269	1.73e-05	ATP-dependent protease ATP-binding subunit
MMARE11_10060	0.18901	-2.40346	1.75e-05	30S ribosomal protein S8, RpsH"
MMARE11_46390	0.0351969	-4.82841	1.77e-05	lycopene cyclase, CrtYd"
MMARE11_33990	0.109274	-3.19398	2.8e-05	conserved hypothetical protein"
MMARE11_25960	0.188406	-2.40808	2.85e-05	conserved protein"
MMARE11_52820	0.222894	-2.16557	2.9e-05	conserved hypothetical protein"
MMARE11_21100	0.109582	-3.18991	2.97e-05	conserved lipoprotein LprF"
MMARE11_22620	0.247224	-2.01611	3.16e-05	probable polyketide synthase Pks5"
MMARE11_32410	0.223726	-2.16019	3.2e-05	acetyl/propionyl-CoA carboxylase (beta subunit)
MMARE11_52740	0.256002	-1.96577	3.21e-05	PPE family protein"
MMARE11_01760	0.0927121	-3.4311	3.73e-05	10 kDa culture filtrate antigen EsxB_1"
MMARE11_52670	0.218874	-2.19183	3.98e-05	conserved hypothetical protein"
MMARE11_32390	0.287216	-1.79979	3.99e-05	3-oxoacyl-[acyl-carrier protein] synthase 1
MMARE11_34140	0.0600819	-4.05693	4.01e-05	conserved hypothetical protein"
MMARE11_16050	0.22104	-2.17762	4.32e-05	electron transfer flavoprotein (beta-subunit)
MMARE11_21790	0.136576	-2.87222	4.37e-05	trehalose-6-phosphate phosphatase OtsB1"
MMARE11_41570	0.117059	-3.09469	4.77e-05	6-phosphogluconate dehydrogenase,
MMARE11_08660	0.0837146	-3.57838	4.79e-05	trypsin-like serine protease"
MMARE11_31400	0.224639	-2.15432	4.86e-05	ubiquinol-cytochrome C reductase QcrC"
MMARE11_25700	0.181681	-2.46052	6.17e-05	conserved hypothetical protein"
MMARE11_13550	0.135287	-2.88591	6.24e-05	non-heme haloperoxidase Hpx"
MMARE11_13770	0.196954	-2.34407	6.41e-05	NADH dehydrogenase I (chain G) NuoG
MMARE11_13700	0.185947	-2.42703	6.81e-05	NADH dehydrogenase I (chain N) NuoN
MMARE11_26250	0.257908	-1.95507	6.89e-05	conserved protein"
MMARE11_24960	0.0622555	-4.00565	7.12e-05	conserved hypothetical protein"
MMARE11_30900	0.230875	-2.11482	7.12e-05	cell division protein FtsZ"
MMARE11_29720	0.0532802	-4.23026	7.35e-05	conserved membrane transport protein, MmpS4_1"
MMARE11_10990	0.177628	-2.49307	8.72e-05	cholesterol oxidase precursor ChoD"
MMARE11_34190	0.312554	-1.67782	9.04e-05	hypothetical protein"
MMARE11_02940	0.205575	-2.28227	9.05e-05	serine protease PepA"
MMARE11_13330	26.5709	4.73178	9.67e-05	transcriptional regulatory protein Whib-like
MMARE11_10840	0.257812	-1.95561	0.00011113	60 kDa chaperone (GroEL1)"
MMARE11_04980	4.406	2.13947	0.000115305	conserved protein"
MMARE11_22060	0.274451	-1.86538	0.000132643	mycobacterial invasion and intracellular
MMARE11_09460	0.342527	-1.54571	0.000141756	DNA-directed RNA polymerase, beta subunit, RpoB"
MMARE11_07210	4.72599	2.24062	0.000146099	conserved transmembrane transport protein
MMARE11_26490	3.88637	1.95843	0.000149024	NADH dehydrogenase Ndh"
MMARE11_49230	0.285635	-1.80775	0.000157445	iron-regulated Lsr2 protein precursor"
MMARE11_32400	0.199708	-2.32403	0.000170608	3-oxoacyl-[acyl-carrier protein] synthase 2
MMARE11_21280	8.2426	3.0431	0.0001737	conserved hypothetical secreted protein"
MMARE11_36120	0.0541574	-4.2067	0.000175906	conserved hypothetical protein"
MMARE11_33140	0.071131	-3.81338	0.000176344	NADH-dependent glutamate synthase (small
MMARE11_07000	48.1374	5.58909	0.000180308	MFS transporter"
MMARE11_22080	0.224975	-2.15216	0.000200004	transcriptional regulatory protein, MoxR1"
MMARE11_23820	0.291378	-1.77904	0.000201618	PE-PGRS family protein"
MMARE11_10650	0.244749	-2.03063	0.000202541	ribosomal protein S9, RpsI"
MMARE11_06910	0.121173	-3.04486	0.000204772	transmembrane protein"
MMARE11_43750	0.0870463	-3.52207	0.000209872	PE-PGRS family protein"
MMARE11_51890	0.358678	-1.47924	0.000212658	secreted antigen 85-A FbpA"
MMARE11_16870	0.348471	-1.52089	0.000217824	multifunctional mycocerosic acid synthase
MMARE11_35980	6.75076	2.75505	0.000219426	non-ribosomal peptide synthetase MbtE"
MMARE11_13780	0.171344	-2.54503	0.000220124	NADH dehydrogenase I (chain F) NuoF
MMARE11_13320	5.56055	2.47523	0.000221239	hypothetical protein"
MMARE11_49420	0.0826613	-3.59664	0.000227988	EsaT-6 like protein EsxP_1"
MMARE11_36180	0.152884	-2.70949	0.00022975	3'-phosphoadenosine 5'-phosphosulfate reductase
MMARE11_22770	0.195899	-2.35182	0.000232704	conserved polyketide synthase associated protein
MMARE11_47950	0.342527	-1.54571	0.000236501	MCE-family protein Mce4C"
MMARE11_13720	0.182423	-2.45464	0.000236611	NADH dehydrogenase I (chain L) NuoL
MMARE11_11440	0.190934	-2.38885	0.000238834	homoserine O-acetyltransferase MetA"
MMARE11_23500	8.50127	3.08768	0.000241839	conserved hypothetical membrane protein"
MMARE11_50540	0.1685	-2.56918	0.000243226	recombination protein RecR"
MMARE11_09420	3.56007	1.83191	0.000251531	50S ribosomal protein L7/L12, RplL"
MMARE11_26260	0.242522	-2.04382	0.00025161	conserved hypothetical regulatory protein"
MMARE11_40280	0.219468	-2.18792	0.000255116	alternative RNA polymerase sigma factor SigE"
MMARE11_45020	0.28214	-1.82552	0.000256657	fatty oxidation protein FadB"
MMARE11_39100	0.258771	-1.95025	0.000256732	transcription termination factor Rho"
MMARE11_37200	0.174917	-2.51525	0.000258502	'tRNA-Arg(tct)'"
MMARE11_03800	0.279916	-1.83693	0.000263597	MCE-family protein Mce1F"
MMARE11_46540	7.58165	2.92251	0.000266395	ATP-dependent RNA helicase, RhlE1"
MMARE11_52650	0.231536	-2.11069	0.000269259	conserved hypothetical transmembrane protein"
MMARE11_41460	61.0696	5.93238	0.000271777	5-methyltetrahydropteroyltriglutamate--homocysteine
MMARE11_13820	0.152109	-2.71682	0.000273437	NADH dehydrogenase I (chain B) NuoB
MMARE11_03760	0.291907	-1.77642	0.000273579	MCE-family protein Mce1B"
MMARE11_12820	7.76794	2.95753	0.000279469	linoleoyl-CoA desaturase, DesA3_1"
MMARE11_50550	0.271615	-1.88037	0.000281293	conserved protein"
MMARE11_38970	0.34712	-1.52649	0.000282712	ATP synthase beta chain AtpD"
MMARE11_51350	0.219554	-2.18735	0.000282794	two-component sensor kinase TcrY"
MMARE11_03720	0.274348	-1.86592	0.000289792	fatty-acid-CoA ligase FadD5"
MMARE11_49030	0.261614	-1.93449	0.000290043	carbonic anhydrase"
MMARE11_29710	0.170923	-2.54858	0.000291884	conserved transmembrane transport protein,
MMARE11_40390	0.228023	-2.13275	0.000291884	conserved protein"
MMARE11_25850	0.329155	-1.60316	0.000291884	conserved FtsK/SpoIIIE family protein"
MMARE11_12480	0.307954	-1.69921	0.00029358	transcriptional regulatory protein Whib-like
MMARE11_00130	8.3616	3.06378	0.000299184	conserved hypothetical membrane protein"
MMARE11_47920	0.263867	-1.92212	0.000301072	MCE-family protein Mce4F"
MMARE11_04990	5.12167	2.35662	0.000305411	conserved membrane protein"
MMARE11_33170	0.158527	-2.6572	0.000305411	pyruvate dikinase"
MMARE11_25390	0.179946	-2.47436	0.000310241	putative signal-transduction protein containing
MMARE11_13760	0.179498	-2.47796	0.000311252	NADH dehydrogenase I (chain H) NuoH
MMARE11_09450	0.335481	-1.5757	0.000312	ribonucleotide-transport ATP-binding protein ABC
MMARE11_25950	0.2986	-1.74371	0.000314232	EsaT-6 like protein EsxN"
MMARE11_18220	0.333987	-1.58213	0.000317919	translation initiation factor IF-2 InfB"
MMARE11_23710	0.201502	-2.31113	0.000319391	initiation factor IF-3 InfC"
MMARE11_16930	0.361143	-1.46936	0.000322145	phenolpthiocerol synthesis type-I polyketide
MMARE11_31670	0.221197	-2.1766	0.000325799	conserved hypothetical MbtH-like protein"
MMARE11_07440	0.379904	-1.39629	0.000327213	mycolic acid synthase UmaA"
MMARE11_19270	0.259662	-1.94529	0.000330929	RNA polymerase sigma factor SigB"
MMARE11_29160	0.294498	-1.76367	0.000335174	conserved membrane protein"
MMARE11_18010	5.57577	2.47917	0.00034083	high-affinity nickel permease, HoxN"
MMARE11_47960	0.185131	-2.43338	0.000346648	MCE-family protein Mce4B"
MMARE11_49620	0.32804	-1.60806	0.000347387	cold shock protein A CspA_1"
MMARE11_53130	0.136963	-2.86814	0.000347642	conserved protein"
MMARE11_15910	0.141955	-2.8165	0.000349566	conserved membrane protein"
MMARE11_22530	0.298869	-1.74241	0.000359443	conserved hypothetical protein"
MMARE11_06070	0.180806	-2.46748	0.000366972	carbon monoxyde dehydrogenase (large chain),
MMARE11_20140	0.148641	-2.75009	0.00037199	long-chain-fatty-acid-CoA ligase, FadD11_1"
MMARE11_33890	0.0641898	-3.96151	0.000372226	conserved hypothetical membrane protein"
MMARE11_40920	0.316414	-1.66012	0.000373617	low molecular weight T-cell antigen TB8.4"
MMARE11_10090	0.132214	-2.91905	0.000373921	30S ribosomal protein S5, RpsE"
MMARE11_13740	0.182458	-2.45436	0.000377269	NADH dehydrogenase I (chain J) NuoJ
MMARE11_13800	0.256093	-1.96526	0.00038092	NADH dehydrogenase I (chain D) NuoD
MMARE11_09860	0.256541	-1.96274	0.000381325	50S ribosomal protein L3 RplC"
MMARE11_33130	0.0439667	-4.50744	0.000383135	conserved hypothetical protein"
MMARE11_23560	0.405529	-1.30212	0.000385487	ribosomal protein S1 RpsA"
MMARE11_30130	0.316192	-1.66113	0.000395219	ATPase"
MMARE11_12700	0.29146	-1.77863	0.000395739	conserved protein"
MMARE11_01390	4.3598	2.12426	0.000406698	conserved protein"
MMARE11_52810	0.286391	-1.80394	0.000407356	conserved hypothetical alanine and proline rich
MMARE11_30890	0.15862	-2.65635	0.000412568	conserved membrane protein YfiH"
MMARE11_43400	0.183073	-2.44951	0.000413756	pterin-4-alpha-carbinolamine dehydratase MoaB2"
MMARE11_24820	0.289766	-1.78704	0.000413892	'RNA chaperone/anti-terminator'"
MMARE11_43410	0.245785	-2.02453	0.000421267	serine protease PepD"
MMARE11_05870	0.147243	-2.76373	0.000421267	GrpE protein (Hsp-70 cofactor)"
MMARE11_47280	0.117526	-3.08895	0.000421267	conserved protein"
MMARE11_42700	4.08315	2.02968	0.000423141	two-component transcriptional regulator TrcR"
MMARE11_25940	0.147666	-2.75959	0.000424032	EsaT-6 like protein EsxM"
MMARE11_15930	0.104025	-3.265	0.000426749	tryptophan-rich sensory protein"
MMARE11_03300	0.255597	-1.96806	0.000439003	short-chain type dehydrogenase/reductase"
MMARE11_03750	0.308605	-1.69616	0.000445353	MCE-family protein Mce1A"
MMARE11_10480	0.268136	-1.89896	0.000451344	50S ribosomal protein L17, RplQ"
MMARE11_10100	0.124932	-3.00078	0.000460196	50S ribosomal protein L30, RpmD"
MMARE11_22760	0.251835	-1.98945	0.000462631	conserved hypothetical protein"
MMARE11_07090	0.31658	-1.65936	0.000471355	60 kDa chaperonin 2 GroEL2"
MMARE11_04690	3.59515	1.84605	0.000478842	succinate dehydrogenase (membrane anchor
MMARE11_23630	0.385687	-1.3745	0.000482348	iron-regulated conserved protein"
MMARE11_10050	0.25175	-1.98994	0.000485963	30S ribosomal protein S14, RpsN"
MMARE11_35100	6.36734	2.67069	0.000492492	hypothetical protein"
MMARE11_52790	0.353456	-1.5004	0.000501172	conserved hypothetical alanine rich secreted
MMARE11_38990	0.420069	-1.2513	0.000519145	ATP synthase alpha chain AtpA"
MMARE11_15920	0.170191	-2.55478	0.000521946	DNA photolyase, PhrI"
MMARE11_03310	0.199575	-2.32499	0.0005224	quinone oxidoreductase"
MMARE11_12710	0.397472	-1.33107	0.000543767	preprotein translocase SecA1 1 subunit"
MMARE11_36040	6.93356	2.7936	0.000546344	lysine-N-oxygenase MbtG"
MMARE11_20180	0.0871275	-3.52073	0.000549261	conserved transmembrane alanine and leucine rich
MMARE11_15540	8.60144	3.10458	0.000569893	conserved hypothetical protein"
MMARE11_33950	0.183691	-2.44464	0.000579448	conserved hypothetical protein"
MMARE11_50880	0.236859	-2.0779	0.000586569	conserved hypothetical protein"
MMARE11_35450	20.8138	4.37947	0.000598873	integral membrane nitrite extrusion protein
MMARE11_07940	0.289941	-1.78617	0.000600311	uroporphyrin-III C-methyltransferase HemD"
MMARE11_07930	0.291993	-1.776	0.00060399	porphobilinogen deaminase HemC"
MMARE11_10640	0.366524	-1.44802	0.000630713	50S ribosomal protein L13, RplM"
MMARE11_10960	0.327772	-1.60924	0.000647693	inosine-5'-monophosphate (imp) dehydrogenase,
MMARE11_43620	0.271703	-1.8799	0.000649015	succinyl-CoA synthetase (alpha chain) SucD"
MMARE11_19150	0.370687	-1.43173	0.000675295	conserved transmembrane alanine and glycine rich
MMARE11_49020	0.312684	-1.67722	0.000703874	conserved membrane protein"
MMARE11_45030	0.338442	-1.56302	0.00072149	acyl-CoA thiolase FadA"
MMARE11_18910	0.354727	-1.49522	0.000739231	cell division transmembrane protein FtsK"
MMARE11_09220	0.321145	-1.6387	0.000748916	50S ribosomal protein L11, RplK"
MMARE11_10240	0.316528	-1.65959	0.00075062	conserved protein"
MMARE11_09920	0.235054	-2.08894	0.000770907	30S ribosomal protein S3, RpsC"
MMARE11_39550	0.208228	-2.26377	0.000772556	lipoprotein LprC"
MMARE11_25930	0.2314	-2.11154	0.00080764	PE family protein, PE19"
MMARE11_14320	0.135604	-2.88253	0.000808343	conserved hypothetical protein"
MMARE11_26810	8.04674	3.0084	0.000827021	conserved hypothetical protein"
MMARE11_22070	0.214535	-2.22071	0.00083528	mycobacterial invasion and intracellular
MMARE11_19310	3.17555	1.66701	0.000841771	conserved hypothetical protein"
MMARE11_17300	5.89222	2.55881	0.000870624	conserved alanine rich lipoprotein LppW"
MMARE11_25100	0.200391	-2.31911	0.000874008	PPE family protein, PPE8"
MMARE11_18230	0.236201	-2.08191	0.000893367	ribosome-binding factor a RbfA"
MMARE11_07780	0.377649	-1.40488	0.000906375	UDP-glucose 4-epimerase GalE2"
MMARE11_36850	0.349047	-1.51851	0.000935169	pyruvate:ferredoxin oxidoreductase PorB, beta
MMARE11_40650	8.8162	3.14016	0.000954382	proline dehydrogenase, PutA"
MMARE11_43630	0.401171	-1.31771	0.000960015	succinyl-CoA synthetase (beta chain) SucC"
MMARE11_03780	0.304793	-1.7141	0.000981356	MCE-family protein Mce1D"
MMARE11_35970	4.21199	2.0745	0.0010105	non-ribosomal peptide synthetase MbtF"
MMARE11_36130	8.11798	3.02112	0.001054	isochorismate synthase MbtI"
MMARE11_16720	8.10411	3.01865	0.00110687	formyltetrahydrofolate deformylase PurU"
MMARE11_42440	8.21833	3.03885	0.00112242	conserved hypothetical protein"
MMARE11_43370	4.37891	2.13057	0.00113243	conserved hypothetical serine rich protein"
MMARE11_47990	0.221801	-2.17267	0.00113271	conserved membrane protein YrbE4A"
MMARE11_43320	0.378222	-1.4027	0.00114273	conserved hypothetical transmembrane protein"
MMARE11_36110	0.285682	-1.80752	0.00115403	acyl-[acyl-carrier protein] desaturase DesA1_1"
MMARE11_22690	0.456336	-1.13183	0.00118136	hypothetical protein"
MMARE11_01790	0.255651	-1.96775	0.00119452	conserved hypothetical EsxA-like protein,
MMARE11_01800	0.255651	-1.96775	0.00122321	conserved hypothetical EsxA-like protein,
MMARE11_18530	0.437982	-1.19106	0.00123183	bifunctional protein polyribonucleotide
MMARE11_46460	20.3015	4.34352	0.00123275	conserved hypothetical transmembrane protein"
MMARE11_21270	0.331562	-1.59265	0.00124736	s-adenosylmethionine synthetase MetK"
MMARE11_11450	0.331496	-1.59294	0.0012518	O-acetylhomoserine sulfhydrylase MetC"
MMARE11_11250	0.384335	-1.37956	0.00125577	conserved hypothetical regultory protein"
MMARE11_43030	0.247953	-2.01186	0.00126307	conserved hypothetical membrane protein"
MMARE11_49410	0.0751503	-3.73408	0.00136628	EsaT-6 like protein EsxN_2"
MMARE11_06750	0.325201	-1.62059	0.00138491	lipoprotein aminopeptidase LpqL"
MMARE11_17470	0.381165	-1.39151	0.00139674	elongation factor Tsf"
MMARE11_15050	13.02	3.70266	0.00141596	hypothetical protein"
MMARE11_33870	0.11136	-3.1667	0.00143189	conserved hypothetical protein"
MMARE11_38960	0.355478	-1.49217	0.00143637	ATP synthase epsilon chain AtpC"
MMARE11_51030	0.33515	-1.57712	0.00143708	PE family protein, PE34"
MMARE11_09890	0.367631	-1.44367	0.00147912	50S ribosomal protein L2, RplB"
MMARE11_23490	3.85774	1.94776	0.00148353	integral membrane cytochrome D ubiquinol oxidase
MMARE11_40260	0.340607	-1.55382	0.00155686	serine protease HtrA (DegP protein)"
MMARE11_20130	0.170656	-2.55083	0.00157763	conserved hypothetical protein"
MMARE11_23720	0.170876	-2.54898	0.00157883	50S ribosomal protein L35, RpmL"
MMARE11_07770	0.372351	-1.42527	0.00159008	conserved hypothetical protein"
MMARE11_07300	0.0586791	-4.09101	0.00160953	aldehyde dehydrogenase, PutA_1"
MMARE11_25840	0.344095	-1.53912	0.00162974	conserved membrane protein"
MMARE11_10040	0.389007	-1.36213	0.00163501	50S ribosomal protein L5, RplE"
MMARE11_09640	0.171375	-2.54477	0.00165307	30S ribosomal protein S7, RpsG"
MMARE11_10080	0.141067	-2.82554	0.00165544	50S ribosomal protein L18, RplR"
MMARE11_23150	0.276966	-1.85222	0.00166481	l-aspartate oxidase NadB"
MMARE11_17190	0.37061	-1.43202	0.00166714	signal recognition particle protein Ffh"
MMARE11_07310	0.0792664	-3.65715	0.00170088	conserved hypothetical protein"
MMARE11_03810	0.289938	-1.78618	0.00170344	conserved Mce associated membrane protein"
MMARE11_37330	0.216311	-2.20882	0.00173599	acyl-CoA dehydrogenase FadE19"
MMARE11_37150	0.101622	-3.29872	0.00174303	hypothetical protein"
MMARE11_49490	0.290728	-1.78226	0.00175624	D-alanyl-D-alanine carboxypeptidase DacB1"
MMARE11_29480	0.396425	-1.33488	0.00178996	polyketide synthase, Pks12"
MMARE11_43440	3.225	1.6893	0.00182084	50S ribosomal protein L32 RpmF"
MMARE11_20370	0.258719	-1.95054	0.00182485	pyridoxine biosynthesis protein, SnzP"
MMARE11_09910	0.224785	-2.15338	0.00185521	50S ribosomal protein L22, RplV"
MMARE11_42770	0.361472	-1.46805	0.00187123	enolase Eno"
MMARE11_05310	0.249938	-2.00036	0.00187797	conserved hypothetical protein"
MMARE11_35540	0.148826	-2.7483	0.00190459	serine acetyltransferase CysE"
MMARE11_22310	0.350144	-1.51398	0.00191471	UDP-glucose 6-dehydrogenase, UdgL"
MMARE11_05880	0.3224	-1.63308	0.00196021	chaperone protein, DnaJ"
MMARE11_35300	11.6217	3.53875	0.00197718	conserved hypothetical protein"
MMARE11_10660	0.344975	-1.53544	0.00207475	phosphomannomutase, MrsA"
MMARE11_47330	0.345638	-1.53267	0.00207798	serine/threonine-protein kinase PknF_2"
MMARE11_02690	0.115795	-3.11036	0.00208324	PE-PGRS family protein, PE_PGRS1"
MMARE11_31810	0.201626	-2.31024	0.00208526	conserved hypothetical protein"
MMARE11_16940	0.49007	-1.02894	0.00208913	phenolpthiocerol synthesis type-I polyketide
MMARE11_51980	0.242324	-2.04499	0.00209208	acyltransferase"
MMARE11_36400	2.30371	1.20396	0.00209831	30S ribosomal protein S20 RpsT"
MMARE11_37130	0.409979	-1.28638	0.00217298	ATP-binding component of an ABC transporter"
MMARE11_50920	0.323008	-1.63036	0.0021996	long-chain-fatty-acid-CoA ligase FadD15_1"
MMARE11_52370	0.500343	-0.999011	0.00220416	ferredoxin-dependent glutamate synthase [NADPH]
MMARE11_21520	0.213108	-2.23035	0.00225736	transcriptional regulatory protein WhiA"
MMARE11_14340	0.261652	-1.93428	0.00226928	conserved protein"
MMARE11_48980	0.483263	-1.04912	0.00227556	conserved transcriptional regulatory protein"
MMARE11_00720	0.217595	-2.20028	0.00228177	single-strand binding protein Ssb"
MMARE11_09650	0.382106	-1.38795	0.00230011	elongation factor G, FusA1"
MMARE11_28260	0.247152	-2.01653	0.00236041	hypothetical protein"
MMARE11_17010	0.363333	-1.46064	0.00237125	conserved protein"
MMARE11_16310	0.363537	-1.45983	0.00240981	ketol-acid reductoisomerase IlvC"
MMARE11_52730	0.371541	-1.42841	0.00248289	PE family protein"
MMARE11_35960	3.87113	1.95276	0.002496	phenyloxazoline synthase MbtB"
MMARE11_35290	6.89173	2.78487	0.00261753	ornithine aminotransferase RocD1 and RocD2"
MMARE11_51850	0.472066	-1.08294	0.00265141	polyketide synthase Pks13"
MMARE11_35480	5.6654	2.50218	0.00267713	adenylate cyclase"
MMARE11_35470	18.0328	4.17255	0.00267964	formate dehydrogenase H FdhF"
MMARE11_36030	10.6894	3.41811	0.00275583	conserved hypothetical protein MbtH_1"
MMARE11_16770	0.295153	-1.76047	0.00277283	ketoreductase"
MMARE11_29540	0.19626	-2.34916	0.00285026	conserved hypothetical membrane protein"
MMARE11_21630	0.359054	-1.47773	0.00287154	triosephosphate isomerase Tpi"
MMARE11_40640	9.13569	3.19151	0.00287205	transcriptional regulator"
MMARE11_31000	0.377351	-1.40602	0.00287841	penicillin-binding membrane protein PbpB"
MMARE11_04600	0.240386	-2.05657	0.00300744	3-oxoacyl-[acyl-carrier protein] reductase
MMARE11_34680	0.242156	-2.04599	0.00304666	conserved hypothetical membrane protein"
MMARE11_20110	0.123824	-3.01363	0.0030803	conserved hypothetical protein"
MMARE11_21970	0.406717	-1.2979	0.00326384	cation transporter p-type ATPase D CtpD"
MMARE11_09210	0.459835	-1.12081	0.00330574	transcription antitermination protein, NusG"
MMARE11_03790	0.260479	-1.94076	0.00335524	MCE-family lipoprotein LprK (MCE-family
MMARE11_05000	2.10864	1.07631	0.00337247	conserved membrane protein"
MMARE11_34110	0.160877	-2.63597	0.00344245	flavodoxin oxidoreductase"
MMARE11_30850	0.442505	-1.17624	0.00346335	conserved secreted antigen Wag31"
MMARE11_18950	0.354563	-1.49589	0.00359778	conserved 35 kDa alanine rich protein"
MMARE11_16800	0.286122	-1.8053	0.00365166	fatty-acid-CoA ligase FadD22"
MMARE11_32220	10.6461	3.41225	0.00371446	hypothetical protein"
MMARE11_22490	0.256482	-1.96307	0.00383209	conserved hypothetical transmembrane protein"
MMARE11_34050	0.267155	-1.90425	0.00386283	conserved hypothetical protein"
MMARE11_38440	5.50309	2.46024	0.00393795	transmembrane ATP-binding protein ABC
MMARE11_13790	0.220732	-2.17963	0.00393938	NADH dehydrogenase I (chain E) NuoE
MMARE11_41070	0.192127	-2.37987	0.00398703	conserved hypothetical secreted protein"
MMARE11_47320	0.107468	-3.21802	0.00399066	conserved hypothetical protein"
MMARE11_10530	5.78098	2.53131	0.00407019	conserved hypothetical membrane protein"
MMARE11_35410	19.2884	4.26966	0.00409993	peptide synthetase Nrp (peptide synthase)"
MMARE11_22090	0.272747	-1.87437	0.00410847	conserved protein"
MMARE11_02980	0.133636	-2.90361	0.00412818	secreted antigen 85-C FbpC"
MMARE11_42140	0.274178	-1.86682	0.00413524	conserved hypothetical transmembrane protein"
MMARE11_17970	3.50097	1.80776	0.00420072	nickel/iron-hydrogenase I large subunit, HyaB"
MMARE11_12300	0.293373	-1.76919	0.00420845	acyl-CoA dehydrogenase FadE25"
MMARE11_34010	0.117714	-3.08664	0.00422744	pyruvate dehydrogenase E1 component (alpha
MMARE11_04790	5.1364	2.36076	0.00426176	aminoglycoside 2'-N-acetyltransferase Aac"
MMARE11_35990	21.5036	4.42651	0.00432125	conserved hypothetical protein"
MMARE11_37190	0.323531	-1.62803	0.00435763	conserved hypothetical membrane protein"
MMARE11_25990	0.331841	-1.59143	0.00439299	conserved membrane protein"
MMARE11_15940	0.166331	-2.58787	0.00442937	conserved transmembrane transport protein"
MMARE11_21240	0.212506	-2.23443	0.00443689	guanylate kinase Gmk"
MMARE11_46530	0.548384	-0.866741	0.00446828	cold shock protein a, CspA"
MMARE11_06050	0.0775069	-3.68953	0.00451003	carbon monoxyde dehydrogenase (medium chain),
MMARE11_08110	0.223076	-2.16439	0.00457166	metal cation-transporting p-type ATPase F, CtpF"
MMARE11_53080	2.53704	1.34314	0.00462715	hydrolase"
MMARE11_36750	0.501784	-0.994862	0.00479301	ribonuclease E Rne"
MMARE11_04610	0.275817	-1.85822	0.00481531	acetyl-CoA acyltransferase FadA2"
MMARE11_16880	2.83869	1.50522	0.0048633	conserved polyketide synthase associated protein
MMARE11_24970	0.207744	-2.26712	0.00487532	metal cation transporter p-type ATPase a, CtpF"
MMARE11_10110	0.333058	-1.58616	0.0049179	50S ribosomal protein L15, RplO"
MMARE11_22920	0.352831	-1.50295	0.00505292	fatty-acid-CoA ligase, FadD11"
MMARE11_30930	0.310348	-1.68804	0.00514232	UDP-N-acetylglucosamine-N-acetylmuramyl-(pentapeptide)
MMARE11_38840	0.413202	-1.27508	0.00520356	acetyl-CoA acetyltransferase FadA4"
MMARE11_13710	0.376581	-1.40897	0.00528563	NADH dehydrogenase I (chain M) NuoM
MMARE11_30880	0.329693	-1.6008	0.00529332	conserved protein"
MMARE11_27290	17.8219	4.15558	0.00531153	DNA-binding transcriptional regulator EnvR"
MMARE11_33980	0.226034	-2.14539	0.00540069	hypothetical protein"
MMARE11_01540	48.5666	5.60189	0.00549468	glutamate decarboxylase"
MMARE11_37700	0.209626	-2.25411	0.0055185	conserved hypothetical secreted protein"
MMARE11_12660	0.358948	-1.47815	0.00560038	two-component sensory transduction histidine
MMARE11_16490	0.347435	-1.52518	0.00566948	polyphosphate kinase Ppk"
MMARE11_24440	0.175866	-2.50746	0.00576548	PPE family protein"
MMARE11_31010	0.225792	-2.14693	0.00588926	conserved proline rich membrane protein"
MMARE11_00220	0.433437	-1.2061	0.00599897	'tRNA-Ser(cag)'"
MMARE11_07760	0.405989	-1.30049	0.0060655	conserved protein"
MMARE11_22370	0.240779	-2.05422	0.00620664	conserved hypothetical methyltransferase"
MMARE11_01910	6.91509	2.78975	0.00622973	serine hydroxymethyltransferase GlyA2"
MMARE11_36470	6.71969	2.74839	0.00624477	enhanced intracellular survival protein Eis"
MMARE11_04580	0.296576	-1.75352	0.00626262	conserved transmembrane protein"
MMARE11_10500	0.354173	-1.49747	0.00639645	D-serine/D-alanine/glycine transporter, CycA"
MMARE11_24570	0.253817	-1.97814	0.00644036	'tRNA-Pro(ggg)'"
MMARE11_04270	0.18457	-2.43776	0.00662919	enoyl-CoA hydratase EchA1"
MMARE11_47930	0.378255	-1.40257	0.0066313	MCE-family lipoprotein LprN"
MMARE11_39030	2.91074	1.54139	0.00665666	ATP synthase a chain AtpB"
MMARE11_00880	6.79808	2.76513	0.00665783	non-ribosomal peptide synthetase"
MMARE11_43640	2.54297	1.34652	0.00673862	conserved hypothetical protein"
MMARE11_20920	0.418948	-1.25516	0.00684371	alanyl-tRNA synthetase AlaS"
MMARE11_21230	0.235144	-2.08838	0.00684591	integration host factor MihF"
MMARE11_39010	0.530287	-0.915155	0.00685634	ATP synthase B chain AtpF"
MMARE11_43740	0.109018	-3.19737	0.00687562	PE-PGRS family protein"
MMARE11_52140	0.397151	-1.33224	0.00687574	bacterioferritin BfrB"
MMARE11_47760	2.49889	1.32129	0.0068852	conserved hypothetical membrane protein CpsA"
MMARE11_14620	0.109073	-3.19663	0.00690101	conserved hypothetical protein"
MMARE11_04590	0.271326	-1.8819	0.00692761	conserved membrane protein"
MMARE11_45070	0.199517	-2.32541	0.00700236	fatty-acid-CoA racemase Far"
MMARE11p_00250	4.59217	2.19918	0.00701531	'serine/threonine-protein kinase'"
MMARE11_11040	6.39045	2.67592	0.00712075	conserved hypothetical protein"
MMARE11_20200	0.232631	-2.10389	0.0072466	conserved hypothetical protein"
MMARE11_21950	0.236261	-2.08155	0.00736053	acyl-CoA dehydrogenase FadE15"
MMARE11_23760	0.383658	-1.38211	0.00747727	PE family protein"
MMARE11_53100	0.262214	-1.93118	0.00753016	chromosome partitioning protein ParB"
MMARE11_02910	0.272718	-1.87452	0.00755454	elongation factor G FusA2"
MMARE11_16060	0.410627	-1.2841	0.00761007	electron transfer flavoprotein (alpha-subunit)
MMARE11_22740	0.258998	-1.94899	0.00762621	conserved hypothetical transmembrane protein"
MMARE11_48210	3.75197	1.90765	0.00773112	conserved hypothetical secreted protein"
MMARE11_48220	3.75197	1.90765	0.00783648	conserved hypothetical membrane protein"
MMARE11_51940	3.18501	1.6713	0.00785854	UDP-galactopyranose mutase Glf"
MMARE11_52690	0.537406	-0.895914	0.00791511	type VII secretion protein EccA1
MMARE11_21730	0.299093	-1.74133	0.00803446	OXPP cycle protein OpcA"
MMARE11_30920	0.378381	-1.40209	0.00805943	UDP-N-acetylmuramate-alanine ligase MurC"
MMARE11_52150	0.402337	-1.31352	0.00812018	glycerophosphoryl diester phosphodiesterase
MMARE11_31830	0.305105	-1.71262	0.00812514	acetolactate synthase (large subunit) IlvB1_2"
MMARE11_36140	5.53878	2.46957	0.008174	conserved hypothetical protein"
MMARE11_09690	0.30727	-1.70242	0.00819685	ferredoxin reductase"
MMARE11_37370	0.246093	-2.02272	0.00820382	succinyl-CoA:3-ketoacid-coenzyme A transferase
MMARE11_07490	0.330642	-1.59666	0.00820828	iron-regulated heparin binding hemagglutinin
MMARE11_19560	0.356477	-1.48812	0.00823344	1-deoxy-D-xylulose 5-phosphate synthase Dxs1"
MMARE11_06060	0.13507	-2.88822	0.0082394	carbon monoxyde dehydrogenase (small chain),
MMARE11_00960	0.270377	-1.88696	0.00826728	cellobiohydrolase a (1,4-beta-cellobiosidase a)
MMARE11_01510	67.3077	6.0727	0.00828804	nucleoside-diphosphate-sugar epimerase"
MMARE11_25320	0.515798	-0.955123	0.00851234	conserved transmembrane ATP-binding protein ABC
MMARE11_22550	0.343273	-1.54257	0.00851796	glycosyltransferase, WcaA"
MMARE11_44000	2.74437	1.45648	0.00857006	DNA binding domain, excisionase family"
MMARE11_22640	0.537006	-0.89699	0.00857157	conserved transmembrane transport protein, MmpL
MMARE11_52020	2.83431	1.503	0.00864291	conserved hypothetical protein"
MMARE11_27590	0.177378	-2.4951	0.00885352	immunogenic protein Mpt63"
MMARE11_29990	0.247427	-2.01493	0.00905524	conserved membrane protein"
MMARE11_21680	5.61746	2.48992	0.00909321	protein-export membrane protein (translocase
MMARE11_34120	0.142812	-2.80781	0.00913868	ferredoxin"
MMARE11_25980	0.516662	-0.952709	0.00916453	proline rich membrane-anchored mycosin MycP5"
MMARE11_32010	3.35622	1.74684	0.00927256	3-methyl-2-oxobutanoate hydroxymethyltransferase
MMARE11_16350	0.323735	-1.62711	0.00927684	3-isopropylmalate dehydrogenase LeuB"
MMARE11_02670	0.415278	-1.26785	0.0093051	cation-transporter ATPase I CtpI"
MMARE11_18940	0.24984	-2.00092	0.00934387	transcriptional regulatory protein"
MMARE11_49880	0.522655	-0.936069	0.00935563	conserved regulatory protein"
MMARE11_36020	3.25044	1.70064	0.00935771	polyketide synthase MbtD"
MMARE11_25300	0.399697	-1.32302	0.00951392	aldehyde dehydrogenase"
MMARE11_26330	0.469788	-1.08992	0.00953173	conserved membrane protein"
MMARE11_10870	0.148717	-2.74936	0.00954442	PPE family protein"
MMARE11_05910	7.38382	2.88437	0.00976674	PPE family protein"
MMARE11_18200	0.38329	-1.38349	0.0100025	N utilization substance protein a NusA"
MMARE11_36920	0.439905	-1.18474	0.0100041	'tRNA-Gly(tcc)'"
MMARE11_36880	0.566235	-0.820528	0.0100226	ATP-dependent CLP protease ATP-binding subunit
MMARE11_21210	0.474334	-1.07602	0.0100412	carbamoyl-phosphate synthase large chain CarB"
MMARE11_01590	89.3697	6.48171	0.0100431	conserved membrane protein"
MMARE11_05660	0.198409	-2.33345	0.0100469	PE-PGRS family protein, PE_PGRS9_5"
MMARE11_18500	2.64847	1.40516	0.010052	30S ribosomal protein S15 RpsO"
MMARE11_44350	0.197242	-2.34196	0.0103623	PE family protein"
MMARE11_44800	0.333847	-1.58274	0.0104071	conserved protein"
MMARE11_20580	3.81416	1.93136	0.0105291	fatty-acid-CoA ligase FadD9"
MMARE11_26380	0.333722	-1.58328	0.0105452	inosine-5'-monophosphate dehydrogenase GuaB1"
MMARE11_07600	0.377035	-1.40723	0.0106662	transcriptional regulatory protein"
MMARE11_28500	0.256932	-1.96054	0.0107197	conserved hypothetical secreted protein"
MMARE11_31820	0.235327	-2.08726	0.0107559	conserved hypothetical protein"
MMARE11_39930	7.60297	2.92656	0.0108895	conserved hypothetical integral membrane
MMARE11_42710	3.35241	1.7452	0.0110414	two-component sensor histidine kinase TrcS"
MMARE11_21720	0.305584	-1.71036	0.0110647	6-phosphogluconolactonase DevB"
MMARE11_51400	0.152541	-2.71273	0.011105	PE-PGRS family protein"
MMARE11_37310	0.240017	-2.05879	0.011203	citrate (pro-3s)-lyase (beta subunit) CitE"
MMARE11_31950	0.452294	-1.14467	0.0114209	glutamate-ammonia-ligase adenylyltransferase
MMARE11_23140	0.368947	-1.43851	0.0115443	quinolinate synthetase NadA"
MMARE11_12370	0.308095	-1.69855	0.0116256	metal cation-transporting p-type ATPase C CtpC"
MMARE11_36910	0.454718	-1.13696	0.0116672	ATP-dependent CLP protease proteolytic subunit 1
MMARE11_28990	8.21388	3.03806	0.0117808	acyl-ACP thioesterase, FatA"
MMARE11_22880	0.268748	-1.89567	0.0117836	fatty acyl-CoA reductase"
MMARE11_06850	0.373663	-1.42019	0.0117841	thiamine biosynthesis protein ThiC"
MMARE11_07110	0.338956	-1.56083	0.0118607	PPE family protein, PPE10"
MMARE11_25080	5.77559	2.52997	0.011916	Z-decaprenyl diphosphate synthase"
MMARE11_40510	19.0819	4.25413	0.0119554	conserved integral membrane transport protein"
MMARE11_52880	4.03751	2.01347	0.0120055	hypothetical protein"
MMARE11_01550	77.0808	6.2683	0.0120431	conserved protein"
MMARE11_46550	5.76559	2.52747	0.0122016	conserved hypothetical protein"
MMARE11_46510	0.121037	-3.04647	0.0122217	conserved hypothetical protein"
MMARE11_31800	0.26473	-1.9174	0.0124722	multimeric flavodoxin WrbA"
MMARE11_52490	26.5401	4.7301	0.0125118	conserved hypothetical protein"
MMARE11_43960	4.35755	2.12352	0.0125494	divalent cation-transport integral membrane
MMARE11_22110	0.364384	-1.45647	0.0127484	3-oxoacyl-[acyl-carrier protein] reductase,
MMARE11_34200	0.503516	-0.989889	0.0128482	Geranylgeranyl pyrophosphate synthase"
MMARE11_00870	8.29885	3.05291	0.0129903	polyketide synthase"
MMARE11_51000	0.406194	-1.29976	0.0130378	non-ribosomal peptide synthetase"
MMARE11_34890	0.196474	-2.34759	0.0130909	PE-PGRS family protein"
MMARE11_03290	0.503771	-0.989161	0.0130962	aldehyde dehydrogenase (NAD+) dependent"
MMARE11_45780	8.13726	3.02454	0.0132358	integral membrane transporter"
MMARE11_10130	0.348635	-1.52021	0.0132723	protease iv, Ssp"
MMARE11_16680	0.36796	-1.44238	0.0133667	pyruvate carboxylase Pca"
MMARE11_23970	2.26871	1.18187	0.0137743	chalcone synthase, Pks11_1"
MMARE11_22630	0.48935	-1.03106	0.0138822	fatty acyl-AMP ligase FadD25"
MMARE11p_00890	11.1089	3.47364	0.0139914	hypothetical protein"
MMARE11_30860	4.25858	2.09037	0.0140012	conserved hypothetical membrane protein"
MMARE11_25800	4.18125	2.06393	0.0140781	conserved hypothetical membrane protein"
MMARE11_13110	0.291825	-1.77683	0.0140798	Soj/ParA-related protein"
MMARE11_43580	0.406119	-1.30003	0.0141729	conserved transmembrane protein"
MMARE11_07350	0.367692	-1.44343	0.0144264	dihydrolipoamide dehydrogenase Lpd"
MMARE11_26390	0.424828	-1.23505	0.0144706	6-phosphogluconate dehydrogenase Gnd1"
MMARE11_36170	0.398086	-1.32885	0.0144939	ferredoxin-dependent nitrite reductase, NirA_2"
MMARE11_00010	2.93304	1.5524	0.0145533	Chromosomal replication initiator protein DnaA"
MMARE11_48660	5.34113	2.41714	0.0146385	acyl-CoA dehydrogenase FadE31"
MMARE11_02810	2.58366	1.36942	0.0146483	conserved hypothetical protein"
MMARE11_23810	15.2889	3.93441	0.0147251	PE-PGRS family protein"
MMARE11_05380	25.4568	4.66998	0.0148065	glucose kinase"
MMARE11_37010	0.312077	-1.68002	0.0149092	conserved protein"
MMARE11_50300	0.164335	-2.60528	0.0152903	PE-PGRS family protein, PE_PGRS9_2"
MMARE11_46070	7.09547	2.8269	0.0152903	2-hydroxy-6-OXO-6-phenylhexa-2,4-dienoate
MMARE11_00740	0.425135	-1.23401	0.0156212	50S ribosomal protein L9 RplI"
MMARE11_22540	0.428544	-1.22248	0.0156258	acetolactate synthase (large subunit) IlvB1_3"
MMARE11_15640	0.379226	-1.39887	0.0156495	transcriptional regulatory protein (probably
MMARE11_37340	0.288152	-1.7951	0.0157204	acetyl-/propionyl-coenzyme A carboxylase alpha
MMARE11_22160	0.263879	-1.92205	0.0157276	conserved hypothetical secreted protein"
MMARE11_41640	9.25677	3.21051	0.015857	conserved hypothetical exported protein"
MMARE11_36900	0.288192	-1.7949	0.0161404	ATP-dependent CLP protease proteolytic subunit 2
MMARE11_20150	0.454625	-1.13725	0.0162147	conserved hypothetical protein"
MMARE11_16920	0.562909	-0.829027	0.0163334	phenolpthiocerol synthesis type-I polyketide
MMARE11_29920	10.0527	3.32951	0.016359	conserved hypothetical alanine and proline rich
MMARE11_23030	0.391125	-1.3543	0.0166711	inv protein"
MMARE11_00100	0.100112	-3.32032	0.0167168	conserved hypothetical protein"
MMARE11_18770	0.178762	-2.48388	0.0168491	acyl-CoA dehydrogenase FadE34_1"
MMARE11_19670	3.13045	1.64637	0.0168618	conserved transmembrane protein"
MMARE11_09850	0.426985	-1.22774	0.0170174	30S ribosomal protein S10, RpsJ"
MMARE11_20540	0.161441	-2.63092	0.0170179	PE-PGRS family protein"
MMARE11_05090	3.15462	1.65747	0.0171417	conserved hypothetical membrane protein"
MMARE11_19940	9.70312	3.27845	0.017148	hypothetical protein"
MMARE11_46770	0.133873	-2.90107	0.0171573	sulphur metabolism protein, SseC2"
MMARE11_17530	0.459946	-1.12046	0.0172418	uridylate kinase PyrH"
MMARE11_10430	0.456176	-1.13234	0.0173407	50S ribosomal protein L36 RpmJ"
MMARE11_21410	0.382668	-1.38584	0.0175241	aminoglycosides/tetracycline-transport integral
MMARE11_17030	0.362384	-1.46441	0.0176219	ribonuclease III Rnc"
MMARE11_01410	0.279426	-1.83946	0.0177004	coenzyme F420-dependent oxidoreductase"
MMARE11_42730	17.1121	4.09695	0.0179024	conserved hypothetical protein"
MMARE11_47730	3.59726	1.8469	0.0179352	conserved hypothetical secreted protein"
MMARE11_45080	0.266614	-1.90718	0.0179758	conserved hypothetical protein"
MMARE11_15000	5.84914	2.54822	0.0181221	conserved hypothetical protein"
MMARE11_23920	0.380974	-1.39224	0.0181968	argininosuccinate lyase ArgH"
MMARE11_22940	4.38655	2.13309	0.0182387	hypothetical protein"
MMARE11_01740	0.22887	-2.1274	0.0182874	PE family protein, PE35"
MMARE11_39120	0.420993	-1.24813	0.0182943	threonine synthase ThrC"
MMARE11_43680	3.55827	1.83118	0.0183131	conserved hypothetical protein"
MMARE11_48870	17.872	4.15963	0.0183451	ATPase component of an ABC-type transport
MMARE11_20840	4.19498	2.06866	0.0183547	conserved hypothetical protein"
MMARE11_48650	8.95055	3.16198	0.0185685	fatty-acid-CoA ligase FadD3"
MMARE11_09870	0.352336	-1.50498	0.0186231	50S ribosomal protein L4, RplD"
MMARE11_12000	0.349119	-1.51821	0.0186264	arylsulfatase AtsB (aryl-sulfate
MMARE11_06590	2.58195	1.36846	0.0186379	phosphate acetyltransferase Pta"
MMARE11_26550	2.74038	1.45438	0.0186802	conserved hypothetical protein"
MMARE11_00900	9.36823	3.22778	0.0187161	polyketide synthase PKS"
MMARE11_36510	5.84874	2.54813	0.0187448	conserved transmembrane transport protein
MMARE11_13840	0.292605	-1.77297	0.0188564	PPE family protein"
MMARE11_09180	0.564879	-0.823986	0.0189436	conserved protein"
MMARE11_23020	2.49645	1.31988	0.01903	conserved hypothetical membrane protein"
MMARE11_06900	0.519624	-0.94446	0.0190876	metal cation transporting p-type ATPase CtpH"
MMARE11_52120	17.6881	4.14471	0.0192008	conserved hypothetical protein"
MMARE11_24240	0.296253	-1.7551	0.0192206	conserved protein"
MMARE11_01530	18.2252	4.18786	0.0194111	4-aminobutyrate aminotransferase, GabT_2"
MMARE11_52680	0.403478	-1.30944	0.0194736	conserved hypothetical protein"
MMARE11_25220	16.3516	4.03136	0.0196174	hypothetical protein"
MMARE11_38190	21.9502	4.45616	0.0196667	conserved hypothetical metal-dependent
MMARE11_40550	2.90014	1.53612	0.0197492	transcriptional regulatory protein"
MMARE11_46940	3.25283	1.7017	0.0197609	UDP-glucose-4-epimerase, CpsY"
MMARE11_15530	0.202648	-2.30295	0.0199525	hypothetical protein"
MMARE11_47910	0.3633	-1.46077	0.0202916	conserved hypothetical alanine and valine rich
MMARE11_20930	0.228515	-2.12964	0.0203584	conserved hypothetical protein"
MMARE11_09630	0.374874	-1.41552	0.0203981	30S ribosomal protein S12, RpsL"
MMARE11_37180	0.405608	-1.30184	0.0204085	bifunctional transmembrane phospholipid
MMARE11_13810	0.352835	-1.50293	0.0206266	NADH dehydrogenase I (chain C) NuoC
MMARE11_13500	0.2837	-1.81756	0.0206949	hypothetical protein"
MMARE11_26090	12.6142	3.65697	0.0207719	hypothetical protein"
MMARE11_05460	12.9992	3.70035	0.020794	hypothetical protein"
MMARE11_05990	0.245544	-2.02595	0.0209629	orotate phosphoribosyltransferase PyrE"
MMARE11_46640	0.547547	-0.868945	0.0210476	acyl-[acyl-carrier protein] desaturase DesA1"
MMARE11_32940	0.156691	-2.67401	0.0210691	conserved hypothetical membrane protein"
MMARE11_09930	0.457139	-1.1293	0.0211931	50S ribosomal protein L16, RplP"
MMARE11_37020	0.400201	-1.3212	0.0216008	conserved hypothetical protein"
MMARE11_19280	4.99914	2.32168	0.0216931	conserved hypothetical membrane protein"
MMARE11_21750	0.486369	-1.03988	0.0217833	transaldolase Tal"
MMARE11_29890	0.38963	-1.35982	0.0219161	conserved hypothetical protein"
MMARE11_13830	0.355259	-1.49306	0.0220677	NADH dehydrogenase I (chain a) NuoA
MMARE11_23860	0.365389	-1.4525	0.0222211	glutamate N-acetyltransferase ArgJ"
MMARE11_01660	15.1516	3.9214	0.0222692	MCE-family protein Mce6C"
MMARE11_51900	0.412189	-1.27862	0.0223634	conserved transmembrane protein"
MMARE11_08070	5.63343	2.49401	0.0224174	conserved hypothetical protein"
MMARE11_32330	0.505173	-0.98515	0.0224373	conserved protein"
MMARE11_48880	27.9845	4.80655	0.0225228	permease component of an ABC-type transporter"
MMARE11_11730	0.169468	-2.56092	0.0225578	hypothetical protein"
MMARE11_17670	0.467503	-1.09695	0.0226014	conserved transmembrane protein"
MMARE11_30390	4.02414	2.00868	0.0228802	conserved hypothetical protein"
MMARE11_39680	12.7284	3.66998	0.0232291	citrate (pro-3s)-lyase (beta subunit) CitE_1"
MMARE11_44970	9.99738	3.32155	0.0232994	conserved hypothetical protein"
MMARE11_47940	0.35932	-1.47666	0.0234076	MCE-family protein Mce4D"
MMARE11_05530	2.41246	1.27051	0.0234428	'tRNA-Gly(ccc)'"
MMARE11_32250	20.9292	4.38745	0.0235496	nucleoside-diphosphate-sugar epimerase"
MMARE11_30080	0.419046	-1.25482	0.02368	conserved protein"
MMARE11_12110	9.4817	3.24515	0.0237596	L-lysine-epsilon aminotransferase Lat"
MMARE11_41870	0.43087	-1.21468	0.0239287	fructose 1,6-bisphosphatase GlpX"
MMARE11_40680	13.1585	3.71792	0.0240057	conserved hypothetical protein"
MMARE11_42830	2.24237	1.16503	0.0240057	ribose-phosphate pyrophosphokinase PrsA"
MMARE11_14290	0.193689	-2.36819	0.0241384	two-component transcriptional regulatory protein
MMARE11_51840	0.54883	-0.865568	0.0241742	propionyl-CoA carboxylase beta chain 4 AccD4_1"
MMARE11_21940	0.384088	-1.38049	0.0243263	PE-PGRS family protein"
MMARE11_37350	0.350548	-1.51232	0.0244384	acetyl-/propionyl-CoA carboxylase (beta subunit)AccD1
MMARE11_27830	30.6281	4.93679	0.0244776	enoyl-CoA hydratase EchA13"
MMARE11_00660	3.86059	1.94882	0.0247271	conserved hypothetical membrane protein"
MMARE11_17630	2.18979	1.13079	0.0248982	hypothetical protein"
MMARE11_53120	0.169972	-2.55663	0.0249298	glucose-inhibited division protein B Gid"
MMARE11_40170	5.68648	2.50754	0.0249965	sugar-transport integral membrane protein ABC
MMARE11_34670	0.302226	-1.7263	0.0250453	conserved proline, glycine, valine-rich secreted
MMARE11_41200	1.80924	0.855386	0.0251949	conserved hypothetical protein"
MMARE11_00770	3.5764	1.83851	0.0252231	conserved hypothetical protein"
MMARE11_21160	2.37791	1.2497	0.0252834	pyrimidine operon regulatory protein PyrR"
MMARE11_34070	0.0675881	-3.88709	0.0253509	conserved hypothetical protein"
MMARE11_04780	13.7249	3.77872	0.0253787	integral membrane nitrite extrusion protein
MMARE11_36280	0.501407	-0.995946	0.0256726	conserved hypothetical glycosyl hydrolase"
MMARE11_18210	0.506029	-0.982709	0.0259442	conserved hypothetical protein"
MMARE11_38590	0.344758	-1.53634	0.0259645	conserved hypothetical integral membrane protein
MMARE11p_00030	53.0887	5.73033	0.0262653	'ParB/RepB/Spo0J family partition protein'"
MMARE11_49980	3.80098	1.92637	0.0265216	conserved hypothetical protein"
MMARE11_32380	0.637288	-0.649983	0.0265315	meromycolate extension acyl carrier protein
MMARE11_21400	0.473266	-1.07928	0.0266713	bifunctional riboflavin biosynthesis protein
MMARE11_50870	0.216241	-2.20929	0.0267056	conserved hypothetical protein"
MMARE11_50570	0.477504	-1.06642	0.0268243	conserved protein"
MMARE11_17760	34.3938	5.10408	0.0271809	conserved hypothetical membrane protein"
MMARE11_18980	0.295986	-1.7564	0.0272964	glycosyl transferase"
MMARE11_51910	0.43196	-1.21103	0.027396	conserved transmembrane protein"
MMARE11_23950	0.453807	-1.13985	0.027512	polyketide synthase, Pks8"
MMARE11_09490	2.96708	1.56904	0.0275227	ceramidase"
MMARE11_00730	0.302604	-1.7245	0.0276845	30S ribosomal protein S18-1 RpsR1"
MMARE11_06760	0.376743	-1.40835	0.0277215	lipoprotein aminopeptidase LpqL_1"
MMARE11_49350	0.545308	-0.874856	0.0277525	membrane-bound protease FtsH"
MMARE11_17310	0.492224	-1.02261	0.0277875	50S ribosomal protein L19 RplS"
MMARE11_31210	54.7051	5.7736	0.0278778	3-oxoacyl-[acyl-carrier-protein] synthase III,
MMARE11_01480	10.3955	3.37789	0.0281141	conserved hypothetical membrane protein"
MMARE11_34020	0.140721	-2.82909	0.0281889	pyruvate dehydrogenase E1 component (beta
MMARE11_04540	3.47088	1.7953	0.0283905	small secreted protein"
MMARE11_30940	0.511952	-0.965921	0.0287732	FtsW-like protein FtsW"
MMARE11_19440	0.424115	-1.23747	0.0288327	conserved hypothetical protein"
MMARE11_09970	3.78932	1.92194	0.0289335	hypothetical protein"
MMARE11_27550	2.37009	1.24494	0.0290396	acyl-CoA ligase FadD31"
MMARE11_34990	4.32741	2.1135	0.0293074	PPE family protein"
MMARE11_02620	22.626	4.49991	0.029321	50S ribosomal protein L28 RpmB2"
MMARE11_03420	0.51696	-0.951877	0.0294246	NAD(P) transhydrogenase (subunit beta) PntB"
MMARE11_50590	0.42032	-1.25044	0.029717	cyclopropane-fatty-acyl-phospholipid synthase"
MMARE11p_00200	2.47919	1.30987	0.0298598	putative ATPase"
MMARE11_04310	3.71817	1.89459	0.0302041	peptide synthetase"
MMARE11_14730	11.2303	3.48933	0.0302788	conserved hypothetical protein"
MMARE11_20420	11.2303	3.48933	0.0303405	PE-PGRS family protein"
MMARE11_34560	0.27524	-1.86124	0.0305548	conserved hypothetical secreted protein"
MMARE11_52410	22.8162	4.51199	0.0307089	PPE family protein"
MMARE11_01690	6.79499	2.76447	0.0307502	MCE-family protein Mce6F"
MMARE11_39160	26.5864	4.73262	0.0307915	hypothetical protein"
MMARE11_35030	14.81	3.88849	0.0307994	hypothetical protein"
MMARE11_47070	0.428112	-1.22394	0.0311989	phosphoribosylformylglycinamidine synthase I,
MMARE11_38980	0.531202	-0.912667	0.0312344	ATP synthase gamma chain AtpG"
MMARE11_21740	0.493526	-1.0188	0.0316006	glucose-6-phosphate 1-dehydrogenase Zwf2"
MMARE11_18780	0.253428	-1.98035	0.031799	acyl-CoA dehydrogenase FadE18_1"
MMARE11_05720	8.52399	3.09153	0.0318003	conserved hypothetical protein"
MMARE11_27040	0.284484	-1.81358	0.0318562	conserved hypothetical membrane protein"
MMARE11_26340	0.420002	-1.25153	0.0323313	malate synthase G GlcB"
MMARE11_16340	0.405146	-1.30348	0.0325471	D-3-phosphoglycerate dehydrogenase SerA1"
MMARE11_24000	4.30233	2.10512	0.0325798	D-amino acid oxidase Aao_1"
MMARE11_29520	0.490675	-1.02716	0.0325889	polyprenol-monophosphomannose synthase, Ppm1A"
MMARE11_52520	34.9848	5.12866	0.0326744	conserved hypothetical transmembrane protein"
MMARE11_34130	0.123058	-3.02259	0.0327547	conserved hypothetical membrane protein"
MMARE11_41220	0.29819	-1.7457	0.0329802	alpha-methylacyl-CoA racemase Mcr"
MMARE11_00830	5.36276	2.42298	0.0330014	conserved transmembrane transport protein,
MMARE11_38310	10.9751	3.45616	0.0331278	enoyl-CoA hydratase EchA16_1"
MMARE11_07610	0.422205	-1.24398	0.0333491	mannosyltransferase"
MMARE11_42340	0.417675	-1.25955	0.033489	acid phosphatase precursor"
MMARE11_00840	13.8117	3.78782	0.0338726	conserved membrane protein MmpS5_3"
MMARE11_09900	0.447916	-1.1587	0.0339144	50S ribosomal protein S19, RpsS"
MMARE11_49670	14.9469	3.90178	0.0341182	conserved hypothetical membrane protein"
MMARE11_24070	0.498989	-1.00292	0.0341315	long-chain acyl-CoA synthase"
MMARE11_13960	14.07	3.81455	0.0343335	oxidoreductase"
MMARE11_27870	18.8873	4.23935	0.0345205	conserved hypothetical oxidoreducatse"
MMARE11_27580	0.161773	-2.62796	0.0346465	hypothetical protein"
MMARE11_10450	0.42054	-1.24969	0.0346753	30S ribosomal protein S11, RpsK"
MMARE11_14680	4.10059	2.03583	0.0347572	transcriptional regulatory protein"
MMARE11_47130	4.71553	2.23742	0.0349643	conserved hypothetical integral membrane
MMARE11_23510	2.67678	1.4205	0.0350369	'tRNA-Leu(caa)'"
MMARE11_27241	0.315071	-1.66625	0.0350769	conserved membrane protein"
MMARE11_19820	11.3743	3.50771	0.0351108	hypothetical protein"
MMARE11_36860	0.584654	-0.774344	0.0351476	pyruvate:ferredoxin oxidoreductase, PorA, alpha
MMARE11_11920	0.455787	-1.13357	0.0351863	glycerol-3-phosphate dehydrogenase GlpD2"
MMARE11_25380	0.363392	-1.4604	0.0353311	amidohydrolase"
MMARE11_17270	0.405611	-1.30183	0.035339	conserved protein"
MMARE11_16390	3.54968	1.82769	0.0353451	conserved protein"
MMARE11_01560	23.754	4.5701	0.0354823	conserved protein"
MMARE11_38940	4.95337	2.30841	0.0355986	cobalamin adenosyltransferase"
MMARE11_29510	0.479269	-1.06109	0.0359234	polyprenol-monophosphomannose synthase, Ppm1B"
MMARE11_40710	30.4216	4.92702	0.0359503	nitrite extrusion protein, NarK3_3"
MMARE11_34640	18.3769	4.19982	0.0360163	conserved hypothetical protein"
MMARE11_30210	8.54899	3.09575	0.0360291	polyketide synthase and peptide synthetase"
MMARE11_20640	0.452615	-1.14365	0.0360852	adenine phosphoribosyltransferase, Apt"
MMARE11_26920	0.196643	-2.34635	0.0361161	conserved hypothetical protein"
MMARE11_14190	14.0825	3.81583	0.0362642	'Fe/S biogenesis protein NfuA'"
MMARE11_40880	0.37515	-1.41446	0.0362981	aminotransferase"
MMARE11_07220	2.87082	1.52146	0.0364137	conserved membrane protein MmpS4_2"
MMARE11_52970	5.0655	2.34071	0.0364977	conserved hypothetical protein"
MMARE11_27970	10.4646	3.38745	0.0365459	cytochrome P450 278A1 Cyp278A1"
MMARE11_47530	0.374716	-1.41613	0.036957	'tRNA-Thr(tgt)'"
MMARE11_05470	8.76323	3.13146	0.0370102	Transposase"
MMARE11_01640	10.8797	3.44357	0.0371781	MCE-family protein Mce6A"
MMARE11_19550	2.21463	1.14707	0.0374122	conserved protein"
MMARE11_43920	0.472533	-1.08151	0.037467	periplasmic phosphate-binding lipoprotein PhoS2"
MMARE11_50180	5.34519	2.41824	0.0376676	formate dehydrogenase, beta subunit,
MMARE11_17780	17.8664	4.15918	0.0376757	conserved hypothetical membrane protein"
MMARE11_08060	3.2826	1.71484	0.0382728	conserved hypothetical secreted protein"
MMARE11p_00470	4.55881	2.18866	0.0383287	Flp pilus assembly protein, ATPase CpaE"
MMARE11_22170	0.301574	-1.72942	0.0384216	conserved membrane protein"
MMARE11_30280	4.9631	2.31124	0.0384914	PPE family protein, PPE37"
MMARE11_00570	3.29552	1.72051	0.0385007	short-chain type oxidoreductase"
MMARE11_42990	2.89383	1.53298	0.0385827	conserved hypothetical secreted protein"
MMARE11_19840	10.8327	3.43732	0.0386885	hypothetical protein"
MMARE11_21610	0.367221	-1.44528	0.0387335	glyceraldehyde 3-phosphate dehydrogenase Gap"
MMARE11_02430	8.66043	3.11444	0.0388678	oxidoreductase"
MMARE11_32050	0.136918	-2.86862	0.0389014	ribonuclease P RNA"
MMARE11_39150	2.0441	1.03147	0.0390032	'tRNA-Arg(ccg)'"
MMARE11_46310	0.362782	-1.46283	0.039024	hypothetical membrane protein"
MMARE11_11380	0.336618	-1.57081	0.0390595	conserved secreted protein"
MMARE11_04870	0.549791	-0.863045	0.0391411	acyl-CoA dehydrogenase FadE6"
MMARE11_36730	0.590387	-0.760266	0.0392329	50S ribosomal protein L27 RpmA"
MMARE11_51730	3.19576	1.67616	0.0393144	oxidoreductase"
MMARE11_47050	20.2976	4.34324	0.0395672	conserved hypothetical protein"
MMARE11_05900	3.20597	1.68076	0.0396767	PPE family protein"
MMARE11_07280	0.308427	-1.697	0.0396939	enoyl-CoA hydratase EchA2"
MMARE11_14170	17.3559	4.11736	0.0399619	hypothetical protein"
MMARE11_15370	11.0416	3.46488	0.0400948	hypothetical protein"
MMARE11_44700	0.325128	-1.62092	0.0401631	conserved protein"
MMARE11_01070	6.98347	2.80394	0.0402415	conserved hypothetical protein"
MMARE11_22730	2.6791	1.42175	0.0403387	glycosyl transferase"
MMARE11_30190	4.09884	2.03522	0.0406203	non-ribosomal peptide synthetase"
MMARE11_19070	0.259754	-1.94478	0.0406731	conserved hypothetical membrane protein"
MMARE11_24300	0.517153	-0.951337	0.0406746	conserved hypothetical membrane protein"
MMARE11_44360	0.300867	-1.7328	0.0406988	PPE family protein"
MMARE11_42060	5.59646	2.48452	0.0407131	conserved membrane protein"
MMARE11_25970	0.605281	-0.724324	0.040735	conserved membrane protein"
MMARE11_07790	1.75013	0.807462	0.0407486	conserved protein"
MMARE11_01840	0.305337	-1.71153	0.0408017	conserved hypothetical protein"
MMARE11_27560	2.89882	1.53547	0.0409196	phosphotransferase"
MMARE11_40580	0.345664	-1.53256	0.0412136	conserved hypothetical protein"
MMARE11_24290	0.412504	-1.27752	0.0412654	DNA repair protein, RecN"
MMARE11_04300	19.7771	4.30576	0.0412874	fatty-acid-CoA ligase"
MMARE11p_00300	10.2455	3.35692	0.0414163	hypothetical protein"
MMARE11_08420	3.95718	1.98447	0.041422	Glyoxalase"
MMARE11_01830	0.35599	-1.49009	0.0415593	conserved hypothetical membrane protein"
MMARE11_36050	4.74875	2.24755	0.0416412	bifunctional enzyme MbtA: salicyl-AMP ligase
MMARE11_52320	2.11479	1.08051	0.0417497	immunogenic protein Mpt64"
MMARE11_48290	10.2417	3.35638	0.0418793	conserved hypothetical protein"
MMARE11_22120	0.508527	-0.975603	0.0418982	enoyl-[acyl-carrier-protein] reductase, InhA"
MMARE11_42360	0.323461	-1.62834	0.0419678	conserved hypothetical protein"
MMARE11_43800	6.96831	2.80081	0.0421875	conserved hypothetical oxidoreductase"
MMARE11_08650	0.252713	-1.98443	0.0424533	glycerol-3-phosphate dehydrogenase, GpdA1"
MMARE11_29980	0.37379	-1.4197	0.0424569	5'-3' exonuclease"
MMARE11_14200	16.0798	4.00717	0.0424629	peptide synthase"
MMARE11_23890	0.348591	-1.52039	0.0426813	ornithine carbamoyltransferase, anabolic ArgF"
MMARE11_26510	0.416478	-1.26369	0.0426931	oxidoreductase"
MMARE11_27420	0.606587	-0.721214	0.0428498	isocitrate lyase AceAb"
MMARE11_33860	0.190624	-2.39119	0.0429064	ketoacyl-acyl carrier protein synthase III"
MMARE11_03640	4.7874	2.25924	0.0429166	conserved hypothetical protein"
MMARE11_38420	4.79688	2.2621	0.0430934	conserved hypothetical protein"
MMARE11_51990	0.46748	-1.09702	0.0433942	acyltransferase"
MMARE11_38430	3.89891	1.96307	0.0433954	transmembrane ATP-binding protein ABCtransporter
MMARE11_05450	14.5927	3.86718	0.0434891	short-chain type dehydrogenase/reductase"
MMARE11_01940	3.38992	1.76125	0.043491	glycine dehydrogenase GcvB_1"
MMARE11_23220	0.341444	-1.55028	0.0435059	phosphoribosylformimino-5-aminoimidazole
MMARE11_10580	15.1658	3.92275	0.0435306	membrane-anchored serine protease (mycosin),
MMARE11_01520	12.065	3.59275	0.043844	conserved hypothetical transmembrane protein"
MMARE11_30070	0.547241	-0.869752	0.0440977	proteasome (beta subunit) PrcB"
MMARE11_43890	0.375893	-1.41161	0.0443949	transmembrane serine/threonine-protein kinase D
MMARE11_05890	0.28025	-1.83522	0.0444556	heat shock protein transcriptional repressor
MMARE11_39760	4.58198	2.19597	0.0445178	ESX-1 secretion-associated protein A, EspA"
MMARE11_48680	5.45499	2.44758	0.0445447	acyl-CoA dehydrogenase FadE33"
MMARE11_48820	11.1076	3.47348	0.0445515	conserved hypothetical secreted protein"
MMARE11_47450	0.439108	-1.18735	0.0451814	zinc-containing alcohol dehydrogenase
MMARE11_23310	2.7469	1.45781	0.0452073	anchored-membrane serine/threonine-protein
MMARE11_21590	0.435873	-1.19802	0.0452401	dehydrogenase"
MMARE11_47980	0.488416	-1.03382	0.0454845	conserved hypothetical membrane protein YrbE4B"
MMARE11_51820	0.35382	-1.49891	0.0454845	acyl-CoA dehydrogenase FadE35"
MMARE11_21560	2.75785	1.46354	0.0454845	conserved hypothetical protein"
MMARE11_09120	2.07098	1.05031	0.0455221	enoyl-CoA hydratase, EchA3"
MMARE11_16820	0.454598	-1.13734	0.0456004	conserved lipoprotein LppX"
MMARE11_39770	9.31928	3.22022	0.0457784	conserved hypothetical protein"
MMARE11_39710	8.70537	3.12191	0.0458714	acyl-CoA dehydrogenase FadE3"
MMARE11_13750	0.226081	-2.14509	0.0459632	NADH dehydrogenase I (chain I) NuoI
MMARE11_47820	3.14636	1.65368	0.045965	enoyl-CoA hydratase EchA13_1"
MMARE11_04150	1.39829	0.48366	0.0461756	iron-regulated phosphoenolpyruvate carboxykinase
MMARE11_43940	5.5423	2.47048	0.0463869	conserved hypothetical protein"
MMARE11_39780	4.54762	2.18511	0.046724	conserved hypothetical protein"
MMARE11_24950	0.403412	-1.30968	0.0467933	serine/threonine-protein kinase transcriptional
MMARE11_19260	0.60952	-0.714255	0.04689	iron-dependent repressor and activator IdeR"
MMARE11_10360	2.3775	1.24944	0.0469758	methylmalonate semialdehyde dehydrogenase, MmsA"
MMARE11_09770	0.573667	-0.801716	0.0470957	membrane glycosyl transferase"
MMARE11_14300	0.205163	-2.28516	0.0472137	two-component sensor histidine kinase DevS"
MMARE11_48810	3.71351	1.89278	0.0474264	flavodoxin reductase Hmp"
MMARE11_43430	2.16543	1.11465	0.0474546	mycobacterial persistence regulator MprA"
MMARE11_17210	2.35596	1.23632	0.0475549	transmembrane serine/threonine-protein kinase I
MMARE11_38330	6.44915	2.68911	0.0477124	fatty-acid-CoA ligase FadD35_1"
MMARE11_48640	2.87987	1.52601	0.0477641	acyl-CoA dehydrogenase FadE30"
MMARE11_46650	0.542577	-0.882101	0.0480277	transcriptional regulator"
MMARE11_00400	6.56988	2.71587	0.0481307	transcriptional regulatory protein (Whib-like),
MMARE11_16890	1.60752	0.684838	0.0481405	daunorubicin-DIM-transport integral membraneprotein ABC transporter DrrC
MMARE11_04770	6.53138	2.70739	0.0484688	transcriptional regulatory protein"
MMARE11_19540	1.57691	0.657101	0.0485447	arsenic-transport integral membrane protein
MMARE11_37880	5.52951	2.46715	0.0485803	acyl-CoA dehydrogenase FadE17_2"
MMARE11_52850	0.613644	-0.704526	0.0486681	membrane-anchored serine protease (mycosin),MycP1
MMARE11_48790	0.469142	-1.0919	0.0487716	2-hydroxy-6-OXO-6-phenylhexa-2,4-dienoate
MMARE11_43930	4.80784	2.26539	0.0487774	short-chain type dehydrogenase/reductase"
MMARE11_47470	3.43833	1.78171	0.0488012	conserved hypothetical protein"
MMARE11_16910	0.471208	-1.08556	0.0488468	daunorubicin-DIM-transport ATP-binding protein
MMARE11_44650	1.44844	0.534502	0.0488773	citrate synthase I GltA2"
MMARE11_18470	2.36236	1.24023	0.0490309	acyl-CoA dehydrogenase FadE21"
MMARE11_31850	5.59069	2.48303	0.0490856	drug-transport transmembrane ATP-binding protein
MMARE11_48270	3.42906	1.77781	0.049098	conserved hypothetical protein"
MMARE11_10910	3.48843	1.80258	0.0493225	WhiB-like regulatory protein, WhiB3"
MMARE11_19710	3.72813	1.89845	0.0493645	conserved hypothetical protein"
MMARE11_48670	3.02286	1.59591	0.0493868	acyl-CoA dehydrogenase FadE32"
MMARE11_52700	1.57409	0.654522	0.0493981	type VII secretion EccB1
MMARE11_23520	0.637086	-0.650439	0.049403	two-component system transcriptional regulator"
MMARE11_52840	0.443074	-1.17438	0.0496565	type VII secretion EccE1
MMARE11_48150	0.507255	-0.979216	0.0497186	coenzyme F420-dependent oxidoreductase"
MMARE11_03190	0.454099	-1.13892	0.0497292	oxidoreductase"
MMARE11_52210	2.00362	1.00261	0.0497344	transcriptional regulatory protein EspR
MMARE11_13730	0.354083	-1.49784	0.0498381	NADH dehydrogenase I (chain K) NuoK(NADH-ubiquinone oxidoreductase chain K)

## Sheet: E11_ESX1_INT (S6)
Complete list of genes of which expression is significantly changed in M. marinum eccCb1 transposon mutant strain during infection of macrophages vs wild type strain during growth in 7H9 culture medium. P<0.05
Gene ID	foldChange	log2FoldChange	pval	Product
MMARE11_13330	194.966	7.60708	0	whiB7	transcriptional regulatory protein Whib-like
MMARE11_39760	98.1155	6.61641	0	espA	ESX-1 secretion-associated protein A, EspA"
MMARE11_35450	232.487	7.86101	0	narK1	integral membrane nitrite extrusion protein
MMARE11_29140	44.3645	5.47134	0		molecular chaperone (small heat shock protein)"
MMARE11_49730	11.9731	3.58172	8.58e-16		hypothetical protein"
MMARE11_46400	0.0113473	-6.4615	2.22045e-15	mmpL13_1	conserved transmembrane transport protein
MMARE11_52750	0.0841619	-3.57069	1.9984e-14	esxB	Esat-6 like protein EsxB"
MMARE11_39780	105.576	6.72214	2.77556e-14	espD	conserved hypothetical protein"
MMARE11_46360	0.00122914	-9.66814	3.38174e-13	crtI	phytoene dehydrogenase CrtI"
MMARE11_52760	0.110839	-3.17347	3.91021e-13	esxA	6 kDa early secretory antigenic target EsxA
MMARE11_10530	37.4659	5.22751	8.81295e-13		conserved hypothetical membrane protein"
MMARE11_39770	251.795	7.97611	3.56803e-12	espC	conserved hypothetical protein"
MMARE11_35620	0.0768157	-3.70245	8.60845e-12	esxP_2	EsaT-6 like protein EsxP_2"
MMARE11_13320	12.6926	3.66591	2.00424e-11		hypothetical protein"
MMARE11_46350	0.00616578	-7.3415	2.57431e-10	crtE	geranylgeranyl pyrophosphate synthase CrtE"
MMARE11_25880	81.7692	6.35348	5.68587e-10		hypothetical protein"
MMARE11_35630	0.0346952	-4.84912	2.35336e-09		conserved hypothetical protein"
MMARE11_34190	0.115928	-3.1087	4.89078e-09		hypothetical protein"
MMARE11_40510	234.444	7.8731	8.63647e-09		conserved integral membrane transport protein"
MMARE11_35470	115.555	6.85244	1.42136e-08	fdhF	formate dehydrogenase H FdhF"
MMARE11_36470	35.7646	5.16046	1.72962e-08	eis	enhanced intracellular survival protein Eis"
MMARE11_24450	11.2577	3.49284	1.89855e-08		PPE family protein, PPE23"
MMARE11_08940	0.0232612	-5.42593	1.98205e-08		conserved hypothetical protein"
MMARE11p_00900	45.552	5.50944	3.26211e-08		hypothetical protein"
MMARE11_37690	0.209377	-2.25583	8.19666e-08	fas	fatty acid synthase Fas"
MMARE11_47130	35.7119	5.15833	2.10276e-07		conserved hypothetical integral membrane
MMARE11_35610	0.122686	-3.02696	4.3721e-07	esxN_3	EsaT-6 like protein EsxN_3"
MMARE11_46370	0.014149	-6.14316	4.63484e-07	crtB	phytoene synthase, CrtB"
MMARE11_44970	94.8547	6.56765	7.04249e-07		conserved hypothetical protein"
MMARE11_12800	50.7525	5.66541	7.18374e-07		oxidoreductase"
MMARE11_13670	0.0538493	-4.21493	7.66165e-07		PPE family protein"
MMARE11_06730	0.134515	-2.89416	9.34782e-07		conserved hypothetical membrane protein"
MMARE11_49940	0.100123	-3.32016	1.29843e-06	whiB4	transcriptional regulatory protein Whib-like
MMARE11_17760	511.13	8.99755	1.78443e-06		conserved hypothetical membrane protein"
MMARE11_16810	0.191661	-2.38337	1.86814e-06	pks15/1	polyketide synthase Pks15/1"
MMARE11_27560	13.2423	3.72708	1.97621e-06		phosphotransferase"
MMARE11_52330	0.0798073	-3.64734	2.0538e-06		conserved hypothetical protein"
MMARE11_09470	0.247702	-2.01332	2.09105e-06	rpoC	DNA-directed RNA polymerase, beta chain, RpoC"
MMARE11_06740	0.134234	-2.89718	2.09237e-06		conserved hypothetical membrane protein"
MMARE11_23810	123.794	6.95179	2.09555e-06		PE-PGRS family protein"
MMARE11_22620	0.17465	-2.51746	2.20132e-06	pks5	probable polyketide synthase Pks5"
MMARE11_21360	116.922	6.8694	2.31118e-06		methyltransferase"
MMARE11_05680	7.69821	2.94452	2.34258e-06		aminotransferase AlaT"
MMARE11_19120	7.83001	2.96901	2.38865e-06	hflX	GTP-binding protein HflX"
MMARE11_02840	26.3468	4.71955	2.53075e-06		conserved hypothetical protein"
MMARE11_34620	0.0381336	-4.7128	2.5623e-06		PPE family protein, PPE5"
MMARE11_09970	17.4187	4.12256	2.61401e-06		hypothetical protein"
MMARE11_01780	0.221885	-2.17212	2.61635e-06	esxB_2	conserved hypothetical EsxB-like protein,
MMARE11_35100	12.5505	3.64967	2.62598e-06		hypothetical protein"
MMARE11_39000	0.231483	-2.11102	2.67541e-06	atpH	ATP synthase delta chain AtpH"
MMARE11_51340	0.168186	-2.57187	2.68979e-06	lpqH	19 kDa lipoprotein antigen precursor LpqH"
MMARE11_03740	0.169085	-2.56418	2.69819e-06	yrbE1B	conserved hypothetical integral membrane protein
MMARE11_10910	32.6311	5.02818	2.73934e-06	whiB3	WhiB-like regulatory protein, WhiB3"
MMARE11_29170	0.0599941	-4.05904	2.74563e-06	fdxA_2	ferredoxin FdxA_2"
MMARE11_03730	0.187587	-2.41437	2.83011e-06	yrbE1A	conserved hypothetical integral membrane protein
MMARE11_18010	8.76497	3.13175	2.85049e-06	hoxN	high-affinity nickel permease, HoxN"
MMARE11_35710	0.0177936	-5.8125	2.94135e-06		PPE family protein"
MMARE11_35720	0.0177936	-5.8125	3.25902e-06		PPE family protein"
MMARE11_02850	9.62279	3.26646	3.37698e-06		divalent cation-transport integral membrane
MMARE11_46380	0.0170269	-5.87604	3.45e-06	crtYc	lycopene cyclase, CrtYc"
MMARE11_22060	0.194209	-2.36432	3.45181e-06	iipA	mycobacterial invasion and intracellular
MMARE11_30900	0.159823	-2.64545	3.497e-06	ftsZ	cell division protein FtsZ"
MMARE11_04620	3.31611	1.72949	3.52262e-06	fadE5	acyl-CoA dehydrogenase FadE5"
MMARE11_52740	0.238407	-2.0685	3.66179e-06		PPE family protein"
MMARE11_03770	0.23689	-2.07771	3.69523e-06	mce1C	MCE-family protein Mce1C"
MMARE11_46160	6.08254	2.60467	3.73372e-06		PE-PGRS family protein"
MMARE11_04780	89.8514	6.48947	3.90645e-06	narK3_2	integral membrane nitrite extrusion protein
MMARE11_12810	59.9433	5.90553	3.97422e-06	desA3	linoleoyl-CoA desaturase, DesA3"
MMARE11_14280	0.0722504	-3.79085	4.05069e-06		conserved hypothetical membrane protein"
MMARE11_19310	4.90566	2.29445	4.09776e-06		conserved hypothetical protein"
MMARE11_46940	9.73855	3.28371	4.12973e-06	cpsY	UDP-glucose-4-epimerase, CpsY"
MMARE11_35290	16.2269	4.02032	4.53467e-06	rocD	ornithine aminotransferase RocD1 and RocD2"
MMARE11_19300	5.31284	2.40948	4.69571e-06		conserved membrane protein"
MMARE11_35670	0.086701	-3.52781	4.88853e-06	esxN_4	EsaT-6 like protein EsxN_4"
MMARE11_35680	0.086701	-3.52781	4.93152e-06	esxN_5	EsaT-6 like protein EsxN_5"
MMARE11_04850	0.182862	-2.45117	4.93152e-06	fadD2	fatty-acid-CoA ligase FadD2"
MMARE11_09660	0.343903	-1.53993	4.95271e-06	tuf	iron-regulated elongation factor Ef-tu, Tuf"
MMARE11_26490	4.17513	2.06182	4.95605e-06	ndh	NADH dehydrogenase Ndh"
MMARE11_16050	0.203543	-2.29659	5.04501e-06	fixA	electron transfer flavoprotein (beta-subunit)
MMARE11_23500	10.4116	3.38012	5.12258e-06		conserved hypothetical membrane protein"
MMARE11_43370	7.07947	2.82364	5.14601e-06		conserved hypothetical serine rich protein"
MMARE11_10070	0.192521	-2.37691	5.27062e-06	rplF	50S ribosomal protein L6, RplF"
MMARE11_35300	28.5746	4.83666	5.34706e-06		conserved hypothetical protein"
MMARE11_40550	7.70751	2.94627	5.37906e-06		transcriptional regulatory protein"
MMARE11_21790	0.0840899	-3.57192	5.46488e-06	otsB1	trehalose-6-phosphate phosphatase OtsB1"
MMARE11_39930	25.7866	4.68855	5.48172e-06		conserved hypothetical integral membrane
MMARE11_35690	0.0306869	-5.02623	5.48398e-06	esxP_3	EsaT-6 like protein EsxP_3"
MMARE11_35700	0.0306869	-5.02623	5.53385e-06	esxP_4	EsaT-6 like protein EsxP_4"
MMARE11_19270	2.81651	1.49391	5.63465e-06	sigB	RNA polymerase sigma factor SigB"
MMARE11_46530	0.343646	-1.541	5.63465e-06	cspA	cold shock protein a, CspA"
MMARE11_29150	7.05239	2.81811	5.72168e-06	folE_1	GTP cyclohydrolase I FolE_1"
MMARE11_31670	0.0973839	-3.36017	5.77986e-06		conserved hypothetical MbtH-like protein"
MMARE11_39100	0.182124	-2.45701	5.89714e-06	rho	transcription termination factor Rho"
MMARE11_01770	0.187855	-2.41231	6.3163e-06	esxA_1	6 kDa culture filtrate antigen EsxA_1 (early
MMARE11_04720	10.8945	3.44552	6.42572e-06	hsp	heat shock protein Hsp"
MMARE11_10060	0.228679	-2.1286	6.6216e-06	rpsH	30S ribosomal protein S8, RpsH"
MMARE11_21100	0.0991659	-3.33401	7.01352e-06	lprF	conserved lipoprotein LprF"
MMARE11_50450	3.72306	1.89649	7.01738e-06	ask	aspartate kinase Ask"
MMARE11_33970	17.2887	4.11175	7.04799e-06		conserved hypothetical secreted protein"
MMARE11_21280	8.55016	3.09595	7.07253e-06		conserved hypothetical secreted protein"
MMARE11_20170	0.0413488	-4.59601	7.36153e-06		conserved hypothetical protein"
MMARE11_52830	0.334429	-1.58023	7.44088e-06	espB	Esx-1 secreted protein, EspB"
MMARE11_10830	2.53994	1.34479	7.52262e-06	groES	10 kDa chaperone (GroES)"
MMARE11_46390	0.013515	-6.2093	7.60419e-06	crtYd	lycopene cyclase, CrtYd"
MMARE11_49230	0.289642	-1.78766	7.71168e-06	lsr2	iron-regulated Lsr2 protein precursor"
MMARE11_13700	0.184004	-2.44219	7.7236e-06	nuoN	NADH dehydrogenase I (chain N) NuoN
MMARE11_12650	0.281661	-1.82797	7.81979e-06	mtrA	two-component sensory transduction
MMARE11_09460	0.377419	-1.40576	8.21105e-06	rpoB	DNA-directed RNA polymerase, beta subunit, RpoB"
MMARE11_39790	9.48098	3.24504	8.50061e-06	pknH_1	transmembrane serine/threonine-protein kinase H,
MMARE11_24820	0.188576	-2.40678	8.71453e-06		'RNA chaperone/anti-terminator'"
MMARE11_01750	0.363479	-1.46005	8.77456e-06		PPE family protein"
MMARE11_36140	12.9452	3.69434	9.00188e-06		conserved hypothetical protein"
MMARE11_28670	21.6419	4.43576	9.21187e-06		conserved protein"
MMARE11_19330	15.3457	3.93976	9.37866e-06		conserved hypothetical protein"
MMARE11_47330	0.143478	-2.8011	1.00863e-05	pknF_2	serine/threonine-protein kinase PknF_2"
MMARE11_38990	0.347778	-1.52376	1.03366e-05	atpA	ATP synthase alpha chain AtpA"
MMARE11_16930	0.323049	-1.63017	1.0373e-05	ppsD	phenolpthiocerol synthesis type-I polyketide
MMARE11_50550	0.23724	-2.07558	1.03909e-05		conserved protein"
MMARE11_15540	11.9433	3.57813	1.05778e-05		conserved hypothetical protein"
MMARE11_43630	0.292049	-1.77572	1.07444e-05	sucC	succinyl-CoA synthetase (beta chain) SucC"
MMARE11_16470	0.290656	-1.78261	1.11276e-05	hupB	DNA-binding protein Hu, HupB"
MMARE11_42440	12.1415	3.60187	1.18045e-05		conserved hypothetical protein"
MMARE11_08660	0.0750073	-3.73683	1.20215e-05		trypsin-like serine protease"
MMARE11_13340	4.99061	2.31922	1.20215e-05		conserved ATP-binding protein ABC transporter"
MMARE11_34140	0.052399	-4.25432	1.20215e-05		conserved hypothetical protein"
MMARE11_38970	0.348909	-1.51908	1.22857e-05	atpD	ATP synthase beta chain AtpD"
MMARE11_34200	0.216462	-2.20782	1.23081e-05		Geranylgeranyl pyrophosphate synthase"
MMARE11_13720	0.16197	-2.6262	1.24954e-05	nuoL	NADH dehydrogenase I (chain L) NuoL
MMARE11_31400	0.281039	-1.83116	1.25234e-05	qcrC	ubiquinol-cytochrome C reductase QcrC"
MMARE11_49620	0.29645	-1.75414	1.25517e-05	cspA_1	cold shock protein A CspA_1"
MMARE11_22640	0.309548	-1.69176	1.2684e-05		conserved transmembrane transport protein, MmpL
MMARE11_29710	0.118226	-3.08038	1.29401e-05	mmpL5_5	conserved transmembrane transport protein,
MMARE11_51420	9.46661	3.24285	1.31013e-05		O-methyltransferase"
MMARE11_19320	7.63034	2.93175	1.35015e-05		conserved hypothetical protein"
MMARE11_51810	0.0446813	-4.48418	1.3651e-05		conserved hypothetical membrane protein"
MMARE11_46800	13.0739	3.70862	1.38378e-05		conserved hypothetical protein"
MMARE11_13740	0.102786	-3.28229	1.38992e-05	nuoJ	NADH dehydrogenase I (chain J) NuoJ
MMARE11_12820	7.52222	2.91116	1.41533e-05	desA3_1	linoleoyl-CoA desaturase, DesA3_1"
MMARE11_17300	7.39019	2.88561	1.44707e-05	lppW	conserved alanine rich lipoprotein LppW"
MMARE11_22530	0.26858	-1.89658	1.49043e-05		conserved hypothetical protein"
MMARE11_15910	0.0759764	-3.71831	1.518e-05		conserved membrane protein"
MMARE11_52210	6.77231	2.75965	1.57232e-05	espR	conserved protein"
MMARE11_36460	55.5159	5.79483	1.59428e-05		conserved hypothetical membrane protein"
MMARE11_03800	0.301777	-1.72844	1.85281e-05	mce1F	MCE-family protein Mce1F"
MMARE11_10520	26.326	4.71842	1.92638e-05		PPE family protein"
MMARE11_25700	0.241608	-2.04926	1.96765e-05		conserved hypothetical protein"
MMARE11_22760	0.18089	-2.46682	2.00871e-05		conserved hypothetical protein"
MMARE11_29720	0.0425373	-4.55513	2.23511e-05	mmpS4_1	conserved membrane transport protein, MmpS4_1"
MMARE11_51880	0.289824	-1.78675	2.23604e-05	fbpD	secreted Mpt51/Mpb51 antigen protein FbpD"
MMARE11_13770	0.26756	-1.90207	2.2548e-05	nuoG	NADH dehydrogenase I (chain G) NuoG
MMARE11_41570	0.159318	-2.65002	2.32569e-05	gnd2	6-phosphogluconate dehydrogenase,
MMARE11_15000	13.2894	3.7322	2.43333e-05		conserved hypothetical protein"
MMARE11_37200	0.170857	-2.54914	2.87995e-05	argW	'tRNA-Arg(tct)'"
MMARE11_18910	0.293953	-1.76634	2.89726e-05	ftsK	cell division transmembrane protein FtsK"
MMARE11_03760	0.318711	-1.64968	3.09e-05	mce1B	MCE-family protein Mce1B"
MMARE11_13780	0.187081	-2.41827	3.11192e-05	nuoF	NADH dehydrogenase I (chain F) NuoF
MMARE11_47140	18.7137	4.22603	3.28176e-05		conserved hypothetical protein"
MMARE11_22080	0.275455	-1.86011	3.90006e-05	moxR1	transcriptional regulatory protein, MoxR1"
MMARE11_53130	0.0834386	-3.58314	4.1873e-05		conserved protein"
MMARE11_13550	0.188114	-2.41032	4.672e-05	hpx	non-heme haloperoxidase Hpx"
MMARE11_33170	0.131171	-2.93048	4.81596e-05		pyruvate dikinase"
MMARE11_33140	0.0620396	-4.01067	5.13015e-05	gltD_1	NADH-dependent glutamate synthase (small
MMARE11_25890	18.7595	4.22955	5.50979e-05		PPE family protein, PPE25"
MMARE11_07780	0.324018	-1.62585	5.95032e-05	galE2	UDP-glucose 4-epimerase GalE2"
MMARE11_01760	0.188801	-2.40506	6.01839e-05	esxB_1	10 kDa culture filtrate antigen EsxB_1"
MMARE11_47920	0.260937	-1.93823	6.3424e-05	mce4F	MCE-family protein Mce4F"
MMARE11_20140	0.0973041	-3.36136	6.36463e-05	fadD11_1	long-chain-fatty-acid-CoA ligase, FadD11_1"
MMARE11_12910	23.327	4.54393	6.52564e-05		conserved hypothetical membrane protein"
MMARE11_07000	38.3336	5.26054	6.67663e-05		MFS transporter"
MMARE11_43620	0.211567	-2.24081	6.74961e-05	sucD	succinyl-CoA synthetase (alpha chain) SucD"
MMARE11_10650	0.291306	-1.77939	7.44217e-05	rpsI	ribosomal protein S9, RpsI"
MMARE11_03310	0.14019	-2.83454	7.93997e-05		quinone oxidoreductase"
MMARE11_22010	3.76359	1.91211	8.07463e-05		ATP-binding protein ABC transporter"
MMARE11_09860	0.239692	-2.06075	8.68791e-05	rplC	50S ribosomal protein L3 RplC"
MMARE11_51890	0.456445	-1.13149	8.86406e-05	fbpA	secreted antigen 85-A FbpA"
MMARE11_35440	28.4979	4.83278	8.98786e-05		methylase"
MMARE11_07770	0.296805	-1.75241	9.20132e-05		conserved hypothetical protein"
MMARE11_32010	5.30095	2.40625	9.57041e-05	panB	3-methyl-2-oxobutanoate hydroxymethyltransferase
MMARE11_52650	0.296392	-1.75442	0.000113421		conserved hypothetical transmembrane protein"
MMARE11_49030	0.294776	-1.76231	0.000127193		carbonic anhydrase"
MMARE11_22770	0.241428	-2.05034	0.000137056	papA3	conserved polyketide synthase associated protein
MMARE11_26250	0.373991	-1.41893	0.000147269		conserved protein"
MMARE11_44980	25.8243	4.69066	0.000156902		conserved hypothetical protein"
MMARE11_36150	12.1984	3.60862	0.0001627		conserved membrane permease"
MMARE11_30770	0.322532	-1.63249	0.00016291		non-ribosomal peptide synthetase"
MMARE11_33230	26.6535	4.73625	0.00016436	pitB	phosphate-transport permease PitB"
MMARE11_43320	0.33298	-1.58649	0.000165512		conserved hypothetical transmembrane protein"
MMARE11_37330	0.0943583	-3.40571	0.000168508	fadE19	acyl-CoA dehydrogenase FadE19"
MMARE11_02940	0.29108	-1.78051	0.000182274	pepA	serine protease PepA"
MMARE11_08410	3.60653	1.85061	0.000186533	pitA	low-affinity inorganic phosphate transporter,
MMARE11_13820	0.167654	-2.57645	0.000192095	nuoB	NADH dehydrogenase I (chain B) NuoB
MMARE11_43750	0.0988443	-3.3387	0.000196578		PE-PGRS family protein"
MMARE11_16940	0.423688	-1.23893	0.000197558	ppsC	phenolpthiocerol synthesis type-I polyketide
MMARE11_31570	3.01682	1.59303	0.000209679	ilvE	branched-chain amino acid transaminase IlvE"
MMARE11_03750	0.305185	-1.71225	0.000234296	mce1A	MCE-family protein Mce1A"
MMARE11_24960	0.102928	-3.2803	0.00025038		conserved hypothetical protein"
MMARE11_36120	0.0712852	-3.81025	0.000252169		conserved hypothetical protein"
MMARE11_36180	0.19398	-2.36602	0.000264121	cysH	3'-phosphoadenosine 5'-phosphosulfate reductase
MMARE11_22070	0.155639	-2.68373	0.000293235	iipB	mycobacterial invasion and intracellular
MMARE11_21880	2.62616	1.39295	0.00030075		conserved protein"
MMARE11_10360	6.01358	2.58822	0.000331456	mmsA	methylmalonate semialdehyde dehydrogenase, MmsA"
MMARE11_03720	0.340111	-1.55592	0.000333409	fadD5	fatty-acid-CoA ligase FadD5"
MMARE11_47960	0.189018	-2.4034	0.000356211	mce4B	MCE-family protein Mce4B"
MMARE11_44720	3.43714	1.78121	0.000356536		conserved hypothetical protein"
MMARE11_29480	0.328734	-1.60501	0.000366339	pks12	polyketide synthase, Pks12"
MMARE11_23150	0.193654	-2.36845	0.000385872	nadB	l-aspartate oxidase NadB"
MMARE11_33130	0.0277049	-5.17371	0.000413963		conserved hypothetical protein"
MMARE11_49420	0.107396	-3.21899	0.000415888	esxP_1	EsaT-6 like protein EsxP_1"
MMARE11_25800	7.41771	2.89097	0.000435838		conserved hypothetical membrane protein"
MMARE11_41630	13.1851	3.72084	0.000439727		conserved hypothetical protein"
MMARE11_25100	0.148355	-2.75288	0.000457174		PPE family protein, PPE8"
MMARE11_50540	0.229897	-2.12094	0.000458594	recR	recombination protein RecR"
MMARE11_26260	0.331815	-1.59155	0.000463623		conserved hypothetical regulatory protein"
MMARE11_40390	0.281936	-1.82656	0.000475753		conserved protein"
MMARE11_39010	0.420585	-1.24953	0.000480228	atpF	ATP synthase B chain AtpF"
MMARE11_09920	0.209951	-2.25188	0.000482192	rpsC	30S ribosomal protein S3, RpsC"
MMARE11_18530	0.433718	-1.20517	0.000487678	gpsI	bifunctional protein polyribonucleotide
MMARE11_00880	10.3927	3.3775	0.000499341		non-ribosomal peptide synthetase"
MMARE11_01320	6.35234	2.66729	0.000505738		transcriptional regulator"
MMARE11_32390	0.475842	-1.07145	0.000540716	kasA	3-oxoacyl-[acyl-carrier protein] synthase 1
MMARE11_28260	2.9356	1.55366	0.000545202		hypothetical protein"
MMARE11_23190	4.72661	2.24081	0.0005507	hisC1	histidinol-phosphate aminotransferase HisC1"
MMARE11_16060	0.236428	-2.08053	0.000572223	fixB	electron transfer flavoprotein (alpha-subunit)
MMARE11_28270	3.47861	1.79851	0.000574011		conserved hypothetical membrane protein"
MMARE11_47280	0.0915964	-3.44856	0.00058406		conserved protein"
MMARE11_32400	0.317143	-1.65679	0.000603196	kasB	3-oxoacyl-[acyl-carrier protein] synthase 2
MMARE11_51030	0.361432	-1.4682	0.000617377		PE family protein, PE34"
MMARE11_43640	3.14653	1.65376	0.00061804		conserved hypothetical protein"
MMARE11_18220	0.418383	-1.25711	0.000630431	infB	translation initiation factor IF-2 InfB"
MMARE11_02690	0.031686	-4.98001	0.00066857		PE-PGRS family protein, PE_PGRS1"
MMARE11_07930	0.299209	-1.74078	0.000672015	hemC	porphobilinogen deaminase HemC"
MMARE11_04150	2.10478	1.07367	0.000674731	pckA	iron-regulated phosphoenolpyruvate carboxykinase
MMARE11_28350	0.363496	-1.45999	0.000677523	katG	catalase-peroxidase-peroxynitritase T KatG"
MMARE11_10090	0.170822	-2.54943	0.000716676	rpsE	30S ribosomal protein S5, RpsE"
MMARE11_32410	0.422055	-1.2445	0.000722974	accD6	acetyl/propionyl-CoA carboxylase (beta subunit)
MMARE11_30850	0.39168	-1.35225	0.000729312	wag31	conserved secreted antigen Wag31"
MMARE11_06750	0.312201	-1.67945	0.000733771	lpqL	lipoprotein aminopeptidase LpqL"
MMARE11_36110	0.270907	-1.88413	0.000769289	desA1_1	acyl-[acyl-carrier protein] desaturase DesA1_1"
MMARE11_07940	0.308454	-1.69687	0.000775624	hemD	uroporphyrin-III C-methyltransferase HemD"
MMARE11_14990	13.3902	3.74311	0.000780733		oxidoreductase"
MMARE11_09220	0.343006	-1.54369	0.000790944	rplK	50S ribosomal protein L11, RplK"
MMARE11_51850	0.450909	-1.14909	0.000817329	pks13	polyketide synthase Pks13"
MMARE11_52730	0.324577	-1.62337	0.000867487		PE family protein"
MMARE11_09910	0.184241	-2.44033	0.000889739	rplV	50S ribosomal protein L22, RplV"
MMARE11_51350	0.317252	-1.6563	0.000923682	tcrY	two-component sensor kinase TcrY"
MMARE11_01310	4.42091	2.14434	0.000936805		conserved hypothetical membrane protein"
MMARE11_16870	0.507097	-0.979666	0.000936914	mas	multifunctional mycocerosic acid synthase
MMARE11_22540	0.236862	-2.07788	0.000960495	ilvB1_3	acetolactate synthase (large subunit) IlvB1_3"
MMARE11_52790	0.412776	-1.27657	0.000968324		conserved hypothetical alanine rich secreted
MMARE11_14320	0.107327	-3.21992	0.00098672		conserved hypothetical protein"
MMARE11_23690	14.4081	3.84881	0.000988404		conserved hypothetical membrane protein"
MMARE11_22310	0.317609	-1.65468	0.000997034	udgL	UDP-glucose 6-dehydrogenase, UdgL"
MMARE11_13760	0.252553	-1.98534	0.00100015	nuoH	NADH dehydrogenase I (chain H) NuoH
MMARE11_22340	0.16513	-2.59832	0.00100532		nucleoside-diphosphate-sugar epimerase"
MMARE11_22490	0.172594	-2.53455	0.00105256		conserved hypothetical transmembrane protein"
MMARE11_42680	0.469824	-1.08981	0.00108306	esxP	EsaT-6 like protein EsxP"
MMARE11_31700	0.30318	-1.72175	0.00112396		non-ribosomal peptide synthetase"
MMARE11_01070	16.2012	4.01803	0.00113151		conserved hypothetical protein"
MMARE11_04730	13.7265	3.77889	0.00119882	nirB	nitrite reductase [NAD(P)H] large subunit [fad
MMARE11_20180	0.0810305	-3.62539	0.0012328		conserved transmembrane alanine and leucine rich
MMARE11_23710	0.290973	-1.78104	0.00123771	infC	initiation factor IF-3 InfC"
MMARE11_30890	0.204719	-2.28828	0.00124447	yfiH	conserved membrane protein YfiH"
MMARE11_21210	0.347214	-1.5261	0.0012573	carB	carbamoyl-phosphate synthase large chain CarB"
MMARE11_29010	8.67558	3.11696	0.00129902		transcriptional regulatory protein (probably
MMARE11_09420	2.4746	1.3072	0.00130122	rplL	50S ribosomal protein L7/L12, RplL"
MMARE11_33870	0.0731601	-3.7728	0.00135685		conserved hypothetical protein"
MMARE11_41070	0.106912	-3.22551	0.0013677		conserved hypothetical secreted protein"
MMARE11_47930	0.273159	-1.87218	0.00139131	lprN	MCE-family lipoprotein LprN"
MMARE11_49020	0.362255	-1.46492	0.00140733		conserved membrane protein"
MMARE11_10050	0.309096	-1.69387	0.00140923	rpsN	30S ribosomal protein S14, RpsN"
MMARE11_45030	0.400902	-1.31868	0.00141064	fadA	acyl-CoA thiolase FadA"
MMARE11_13800	0.337425	-1.56736	0.00141064	nuoD	NADH dehydrogenase I (chain D) NuoD
MMARE11_16920	0.446909	-1.16195	0.00141347	ppsE	phenolpthiocerol synthesis type-I polyketide
MMARE11_23490	3.52734	1.81858	0.00146054	cydA	integral membrane cytochrome D ubiquinol oxidase
MMARE11_29130	9.86965	3.303	0.00146101	hspR_2	heat shock protein transcriptional repressor
MMARE11_04600	0.183148	-2.44892	0.00146851	fabG4	3-oxoacyl-[acyl-carrier protein] reductase
MMARE11_23560	0.514764	-0.958017	0.00152148	rpsA	ribosomal protein S1 RpsA"
MMARE11_21870	3.68554	1.88188	0.00160596		transcriptional regulatory protein"
MMARE11_29160	0.411578	-1.28076	0.00174222		conserved membrane protein"
MMARE11_22710	3.17956	1.66883	0.00175571	wbbL2	rhamnosyl transferase WbbL2"
MMARE11_31810	0.156863	-2.67242	0.00179652		conserved hypothetical protein"
MMARE11_07440	0.514115	-0.959837	0.00180205	umaA	mycolic acid synthase UmaA"
MMARE11_21900	2.62355	1.39152	0.00182789		conserved ATP-binding protein ABC transporter"
MMARE11_40790	15.0575	3.91241	0.00184413	narK3_4	integral membrane nitrite extrusion protein
MMARE11_47320	0.0514972	-4.27936	0.00185205		conserved hypothetical protein"
MMARE11_26740	2.63235	1.39635	0.00186779	treS_1	trehalose synthase TreS_1"
MMARE11_33990	0.321511	-1.63706	0.00187037		conserved hypothetical protein"
MMARE11_17190	0.38743	-1.36799	0.0018838	ffh	signal recognition particle protein Ffh"
MMARE11_45020	0.444591	-1.16945	0.00191101	fadB	fatty oxidation protein FadB"
MMARE11_22550	0.220364	-2.18204	0.0019393	wcaA	glycosyltransferase, WcaA"
MMARE11_25960	0.431132	-1.2138	0.00196916		conserved protein"
MMARE11_37130	0.418687	-1.25606	0.00197634		ATP-binding component of an ABC transporter"
MMARE11_34680	0.197432	-2.34057	0.00198361		conserved hypothetical membrane protein"
MMARE11_21630	0.344112	-1.53905	0.00199458	tpi	triosephosphate isomerase Tpi"
MMARE11_10080	0.140757	-2.82873	0.00200176	rplR	50S ribosomal protein L18, RplR"
MMARE11_30230	2.99125	1.58075	0.00200346	lpd_1	dihydrolipoamide dehydrogenase Lpd_1"
MMARE11_10990	0.365486	-1.45211	0.00201658	choD	cholesterol oxidase precursor ChoD"
MMARE11_09210	0.462216	-1.11336	0.00209873	nusG	transcription antitermination protein, NusG"
MMARE11_22020	4.45732	2.15618	0.00211818		transcriptional regulatory protein"
MMARE11_38960	0.399768	-1.32277	0.00212492	atpC	ATP synthase epsilon chain AtpC"
MMARE11_11040	7.86567	2.97557	0.00213496		conserved hypothetical protein"
MMARE11_04610	0.207567	-2.26835	0.00213903	fadA2	acetyl-CoA acyltransferase FadA2"
MMARE11_10480	0.351686	-1.50764	0.00214981	rplQ	50S ribosomal protein L17, RplQ"
MMARE11_21230	0.176742	-2.50028	0.0021692	mihF	integration host factor MihF"
MMARE11_48210	4.43536	2.14905	0.00223966		conserved hypothetical secreted protein"
MMARE11_48220	4.43536	2.14905	0.00229074		conserved hypothetical membrane protein"
MMARE11_12000	0.163601	-2.61174	0.00230832	atsB	arylsulfatase AtsB (aryl-sulfate
MMARE11_10100	0.187563	-2.41455	0.00231083	rpmD	50S ribosomal protein L30, RpmD"
MMARE11_03300	0.341669	-1.54933	0.00232277		short-chain type dehydrogenase/reductase"
MMARE11_35270	8.51506	3.09002	0.00234546		conserved hypothetical protein"
MMARE11_30880	0.272917	-1.87346	0.00238665		conserved protein"
MMARE11_29500	2.06355	1.04513	0.00239143		conserved hypothetical protein"
MMARE11_17470	0.43594	-1.1978	0.00242307	tsf	elongation factor Tsf"
MMARE11_34050	0.227578	-2.13557	0.00245164		conserved hypothetical protein"
MMARE11_22700	2.41909	1.27447	0.00250258		conserved hypothetical protein"
MMARE11_36750	0.488671	-1.03306	0.0025168	rne	ribonuclease E Rne"
MMARE11_47760	2.68094	1.42274	0.00257781	cpsA	conserved hypothetical membrane protein CpsA"
MMARE11_22630	0.379299	-1.39859	0.00259463	fadD25	fatty acyl-AMP ligase FadD25"
MMARE11_44000	3.12176	1.64236	0.00262222		DNA binding domain, excisionase family"
MMARE11_13500	0.0885517	-3.49734	0.00267347		hypothetical protein"
MMARE11_19150	0.462734	-1.11174	0.00267895		conserved transmembrane alanine and glycine rich
MMARE11_03810	0.302437	-1.72529	0.00268378		conserved Mce associated membrane protein"
MMARE11_34110	0.0992449	-3.33286	0.00278345		flavodoxin oxidoreductase"
MMARE11_52660	0.47529	-1.07312	0.00283806		conserved hypothetical protein"
MMARE11_22370	0.154102	-2.69804	0.00289303		conserved hypothetical methyltransferase"
MMARE11_09890	0.424963	-1.23459	0.00290165	rplB	50S ribosomal protein L2, RplB"
MMARE11_13710	0.341707	-1.54917	0.00294005	nuoM	NADH dehydrogenase I (chain M) NuoM
MMARE11_42770	0.38889	-1.36257	0.00295618	eno	enolase Eno"
MMARE11_03780	0.374837	-1.41567	0.00295806	mce1D	MCE-family protein Mce1D"
MMARE11_23970	2.63269	1.39654	0.00300114	pks11_1	chalcone synthase, Pks11_1"
MMARE11_33890	0.135245	-2.88635	0.0030204		conserved hypothetical membrane protein"
MMARE11_04790	5.18814	2.37522	0.00311775	aac	aminoglycoside 2'-N-acetyltransferase Aac"
MMARE11_21970	0.422722	-1.24222	0.00314353	ctpD	cation transporter p-type ATPase D CtpD"
MMARE11_52140	2.03443	1.02462	0.00317344	bfrB	bacterioferritin BfrB"
MMARE11_21250	1.8573	0.893211	0.00319005	rpoZ	DNA-directed RNA polymerase (omega chain) RpoZ"
MMARE11_22740	0.163896	-2.60915	0.00320451		conserved hypothetical transmembrane protein"
MMARE11_30930	0.276502	-1.85464	0.00321502	murG	UDP-N-acetylglucosamine-N-acetylmuramyl-(pentapeptide)
MMARE11_20370	0.496926	-1.0089	0.00324023	snzP	pyridoxine biosynthesis protein, SnzP"
MMARE11_39450	2.76462	1.46708	0.00326352		carbonic anhydrase"
MMARE11_12480	0.479374	-1.06078	0.00330136	whiB2	transcriptional regulatory protein Whib-like
MMARE11_00720	0.220483	-2.18126	0.00334423	ssb	single-strand binding protein Ssb"
MMARE11_07300	0.0740234	-3.75587	0.00336634	putA_1	aldehyde dehydrogenase, PutA_1"
MMARE11_36850	0.446397	-1.1636	0.00337007	porB	pyruvate:ferredoxin oxidoreductase PorB, beta
MMARE11_41640	13.9053	3.79757	0.00337116		conserved hypothetical exported protein"
MMARE11_36920	0.374319	-1.41766	0.00338484	glyV	'tRNA-Gly(tcc)'"
MMARE11_38980	0.384178	-1.38015	0.00341622	atpG	ATP synthase gamma chain AtpG"
MMARE11_53080	2.45197	1.29394	0.00345291		hydrolase"
MMARE11_23020	3.03871	1.60346	0.00351218		conserved hypothetical membrane protein"
MMARE11_09850	0.321226	-1.63834	0.00352989	rpsJ	30S ribosomal protein S10, RpsJ"
MMARE11_42690	0.346507	-1.52905	0.00353235	esxN_1	EsaT-6 like protein EsxN_1"
MMARE11_17010	0.38454	-1.3788	0.00355614		conserved protein"
MMARE11_46460	15.9526	3.99572	0.00359154		conserved hypothetical transmembrane protein"
MMARE11_21520	0.216696	-2.20625	0.00360817	whiA	transcriptional regulatory protein WhiA"
MMARE11_37700	0.168653	-2.56787	0.00363262		conserved hypothetical secreted protein"
MMARE11_52810	0.42267	-1.24239	0.00368166		conserved hypothetical alanine and proline rich
MMARE11_13790	0.201472	-2.31135	0.00372789	nuoE	NADH dehydrogenase I (chain E) NuoE
MMARE11_01730	2.09061	1.06393	0.00375283		conserved hypothetical membrane protein"
MMARE11_30020	2.3486	1.2318	0.00390432	tatA	sec-independent protein translocase
MMARE11_02980	0.125469	-2.99459	0.00396159	fbpC	secreted antigen 85-C FbpC"
MMARE11_35540	0.150503	-2.73214	0.0040282	cysE	serine acetyltransferase CysE"
MMARE11p_00890	15.8107	3.98283	0.00407		hypothetical protein"
MMARE11_23720	0.202561	-2.30357	0.00420758	rpmL	50S ribosomal protein L35, RpmL"
MMARE11_40130	20.6043	4.36487	0.00421033	gabP_1	GabA permease GabP_1"
MMARE11_16800	0.313475	-1.67358	0.00427091	fadD22	fatty-acid-CoA ligase FadD22"
MMARE11_42610	2.53662	1.34291	0.0043977		hypothetical membrane protein"
MMARE11_10640	0.490963	-1.02631	0.00447673	rplM	50S ribosomal protein L13, RplM"
MMARE11_28500	0.151873	-2.71906	0.00449703		conserved hypothetical secreted protein"
MMARE11_49220	0.59271	-0.754603	0.00450013	clpC1	ATP-dependent protease ATP-binding subunit
MMARE11_12110	12.5683	3.65171	0.00464905	lat	L-lysine-epsilon aminotransferase Lat"
MMARE11_10900	3.02514	1.597	0.0046674		metal-dependent hydrolase"
MMARE11_08110	0.219362	-2.18861	0.00472193	ctpF	metal cation-transporting p-type ATPase F, CtpF"
MMARE11_19210	3.25773	1.70386	0.00478207		conserved hypothetical hydrolase"
MMARE11_35480	4.91649	2.29763	0.00493852		adenylate cyclase"
MMARE11_32450	3.74815	1.90618	0.00498858		flavoprotein"
MMARE11_04590	0.216909	-2.20484	0.00500087		conserved membrane protein"
MMARE11_04980	2.77327	1.47159	0.00509727		conserved protein"
MMARE11_10960	0.454515	-1.1376	0.00511734	guaB2	inosine-5'-monophosphate (imp) dehydrogenase,
MMARE11_47990	0.303954	-1.71807	0.0051616	yrbE4A	conserved membrane protein YrbE4A"
MMARE11_18230	0.332316	-1.58937	0.00516164	rbfA	ribosome-binding factor a RbfA"
MMARE11_43030	0.325452	-1.61948	0.00517695		conserved hypothetical membrane protein"
MMARE11_52370	0.557522	-0.842899	0.00535081	gltB	ferredoxin-dependent glutamate synthase [NADPH]
MMARE11_09640	0.246098	-2.0227	0.00539928	rpsG	30S ribosomal protein S7, RpsG"
MMARE11_30920	0.337064	-1.5689	0.00544094	murC	UDP-N-acetylmuramate-alanine ligase MurC"
MMARE11_25390	0.350303	-1.51333	0.00547718		putative signal-transduction protein containing
MMARE11_31390	0.452024	-1.14553	0.00552937	ctaE	cytochrome C oxidase (subunit III) CtaE"
MMARE11_04160	2.87974	1.52594	0.00567024	fadD4	fatty-acid-CoA ligase FadD4"
MMARE11_21240	0.223399	-2.16231	0.00581657	gmk	guanylate kinase Gmk"
MMARE11_49880	0.507783	-0.977715	0.005845		conserved regulatory protein"
MMARE11_31000	0.429523	-1.21919	0.00592135	pbpB	penicillin-binding membrane protein PbpB"
MMARE11_05020	0.282189	-1.82527	0.00596476		PPE family protein, PPE4"
MMARE11_49490	0.355343	-1.49272	0.00604976	dacB1	D-alanyl-D-alanine carboxypeptidase DacB1"
MMARE11_25850	0.54258	-0.882091	0.00605561		conserved FtsK/SpoIIIE family protein"
MMARE11_37340	0.180528	-2.46971	0.00605592	accA1	acetyl-/propionyl-coenzyme A carboxylase alpha
MMARE11_24300	0.361682	-1.46721	0.00612528		conserved hypothetical membrane protein"
MMARE11_22690	1.608	0.685266	0.00623305		hypothetical protein"
MMARE11_46140	2.96052	1.56585	0.00626205		'pyruvate dehydrogenase (acetyl-transferring) E1
MMARE11_20130	0.231561	-2.11053	0.00626913		conserved hypothetical protein"
MMARE11_12300	0.331346	-1.59359	0.00630245	fadE25	acyl-CoA dehydrogenase FadE25"
MMARE11_03790	0.316564	-1.65943	0.00635987	lprK	MCE-family lipoprotein LprK (MCE-family
MMARE11_23140	0.308206	-1.69803	0.00639037	nadA	quinolinate synthetase NadA"
MMARE11_01390	2.95507	1.56319	0.00641272		conserved protein"
MMARE11_31560	3.01241	1.59092	0.00642753		conserved hypothetical integral membrane
MMARE11_37350	0.226234	-2.14411	0.00644115	accD1	acetyl-/propionyl-CoA carboxylase (beta subunit)AccD1
MMARE11_00710	0.422715	-1.24224	0.00652666	rpsF	30S ribosomal protein S6 RpsF"
MMARE11_50880	0.3773	-1.40621	0.0065612		conserved hypothetical protein"
MMARE11_27550	2.78171	1.47597	0.00657197	fadD31	acyl-CoA ligase FadD31"
MMARE11_26030	9.25266	3.20987	0.00682702		PPE family protein, PPE31"
MMARE11_22110	0.297471	-1.74918	0.00686559	fabG1	3-oxoacyl-[acyl-carrier protein] reductase,
MMARE11_26070	11.8252	3.56379	0.00691403	mgtC	Mg2+ transport p-type ATPase C MgtC"
MMARE11_43740	0.0673393	-3.89241	0.00693442		PE-PGRS family protein"
MMARE11_22880	0.191137	-2.38732	0.00697436		fatty acyl-CoA reductase"
MMARE11_09200	0.495619	-1.0127	0.00700196	secE	preprotein translocase (tail-anchored membrane
MMARE11_51900	0.313281	-1.67447	0.0070024		conserved transmembrane protein"
MMARE11_40650	5.8039	2.53702	0.00704341	putA	proline dehydrogenase, PutA"
MMARE11_50300	0.0520304	-4.2645	0.00705818		PE-PGRS family protein, PE_PGRS9_2"
MMARE11_10660	0.428731	-1.22186	0.00707364	mrsA	phosphomannomutase, MrsA"
MMARE11_31820	0.14964	-2.74043	0.00729784		conserved hypothetical protein"
MMARE11_15640	0.310331	-1.68812	0.00737138		transcriptional regulatory protein (probably
MMARE11_28280	7.94165	2.98944	0.00744351		hypothetical protein"
MMARE11_32020	4.53176	2.18007	0.00745638		conserved hypothetical membrane protein"
MMARE11_06760	0.25407	-1.9767	0.00746378	lpqL_1	lipoprotein aminopeptidase LpqL_1"
MMARE11_24310	0.274263	-1.86637	0.00757912		conserved hypothetical protein"
MMARE11_42210	5.2013	2.37887	0.00758753		conserved hypothetical protein"
MMARE11_00130	4.36768	2.12687	0.00766884		conserved hypothetical membrane protein"
MMARE11_10950	2.39543	1.26028	0.00777431		conserved hypothetical protein"
MMARE11_38840	0.461099	-1.11685	0.00777522	fadA4	acetyl-CoA acetyltransferase FadA4"
MMARE11_26330	0.467789	-1.09607	0.00800309		conserved membrane protein"
MMARE11_43440	2.5262	1.33697	0.00802601	rpmF	50S ribosomal protein L32 RpmF"
MMARE11_32220	8.6375	3.11061	0.00812533		hypothetical protein"
MMARE11_50480	2.58795	1.37181	0.00816119	leuA	2-isopropylmalate synthase LeuA"
MMARE11_07350	0.325977	-1.61716	0.0081951	lpd	dihydrolipoamide dehydrogenase Lpd"
MMARE11_10560	4.13457	2.04774	0.00819569	cut3	cutinase precursor, Cut3"
MMARE11_52670	0.544596	-0.876741	0.00850037		conserved hypothetical protein"
MMARE11_41620	5.39182	2.43077	0.00857405		conserved protein"
MMARE11_37150	0.140637	-2.82996	0.00858681		hypothetical protein"
MMARE11_15690	3.05274	1.6101	0.00874746		conserved protein"
MMARE11_39550	0.345729	-1.53229	0.00879545	lprC	lipoprotein LprC"
MMARE11_09650	0.487633	-1.03613	0.00880827	fusA1	elongation factor G, FusA1"
MMARE11_09900	0.340846	-1.55281	0.00884324	rpsS	50S ribosomal protein S19, RpsS"
MMARE11_24070	0.402505	-1.31292	0.00898976		long-chain acyl-CoA synthase"
MMARE11_10040	0.517173	-0.951282	0.00901821	rplE	50S ribosomal protein L5, RplE"
MMARE11_26750	1.89135	0.919418	0.00909212	ahpD	alkyl hydroperoxide reductase D protein AhpD"
MMARE11_04580	0.314739	-1.66777	0.0091281		conserved transmembrane protein"
MMARE11_00740	0.392125	-1.35061	0.0091482	rplI	50S ribosomal protein L9 RplI"
MMARE11_44320	4.7401	2.24492	0.00915142		conserved hypothetical protein"
MMARE11_05950	1.97913	0.984863	0.00928635	clpB	endopeptidase ATP binding protein (chain B)
MMARE11_16140	6.92117	2.79102	0.00938929		methyltransferase"
MMARE11_05040	0.339551	-1.5583	0.00946509	esxH	EsaT-6 like protein EsxH"
MMARE11_34890	0.143178	-2.80412	0.00949358		PE-PGRS family protein"
MMARE11_25080	6.03358	2.59301	0.009527		Z-decaprenyl diphosphate synthase"
MMARE11_19740	5.93711	2.56976	0.00955151		conserved secreted protein"
MMARE11_19280	5.84898	2.54818	0.00958871		conserved hypothetical membrane protein"
MMARE11_07310	0.121304	-3.0433	0.00961629		conserved hypothetical protein"
MMARE11_43380	7.41898	2.89122	0.00972155		conserved hypothetical membrane protein"
MMARE11_24570	0.260559	-1.94032	0.00976952	engA	'tRNA-Pro(ggg)'"
MMARE11_23180	2.14445	1.10061	0.00995292	hisD	histidinol dehydrogenase HisD"
MMARE11_28130	4.27677	2.09652	0.010062		hypothetical protein"
MMARE11_34010	0.122208	-3.03259	0.0100729		pyruvate dehydrogenase E1 component (alpha
MMARE11_25910	3.8341	1.93889	0.0101552		PPE family protein, PPE26"
MMARE11_10110	0.395714	-1.33747	0.0101705	rplO	50S ribosomal protein L15, RplO"
MMARE11_33450	7.45707	2.89861	0.0102145		transcriptional regulatory protein (probably
MMARE11_16770	0.386533	-1.37134	0.0102606		ketoreductase"
MMARE11_34670	0.201115	-2.31391	0.0103983		conserved proline, glycine, valine-rich secreted
MMARE11_52630	0.397504	-1.33096	0.0104243	whiB6	conserved hypothetical protein"
MMARE11_51910	0.348401	-1.52118	0.0104397		conserved transmembrane protein"
MMARE11_09930	0.39493	-1.34033	0.0104671	rplP	50S ribosomal protein L16, RplP"
MMARE11_15410	5.81774	2.54046	0.0104765		conserved hypothetical protein"
MMARE11_21350	3.07305	1.61967	0.0104907		transcriptional regulatory protein"
MMARE11_26860	2.67705	1.42064	0.0105093		conserved hypothetical amidase"
MMARE11_00870	9.01472	3.17228	0.0105149		polyketide synthase"
MMARE11_22660	0.444833	-1.16867	0.010561	pks5_1	polyketide synthase, Pks5_1"
MMARE11_09450	0.57529	-0.797638	0.0105698	mkl	ribonucleotide-transport ATP-binding protein ABC
MMARE11p_00050	3.83216	1.93816	0.010595		'Fic/DOC family protein'"
MMARE11_01370	5.08889	2.34735	0.0106263		transcriptional regulatory protein (probably
MMARE11_36680	4.96495	2.31178	0.0108111	cyp268A2	cytochrome P450 268A2 Cyp268A2"
MMARE11_48660	5.63423	2.49422	0.0108178	fadE31	acyl-CoA dehydrogenase FadE31"
MMARE11_31950	0.449829	-1.15255	0.0108232	glnE	glutamate-ammonia-ligase adenylyltransferase
MMARE11_37310	0.196395	-2.34817	0.0108669	citE	citrate (pro-3s)-lyase (beta subunit) CitE"
MMARE11_27290	14.9666	3.90367	0.0109978		DNA-binding transcriptional regulator EnvR"
MMARE11_49410	0.1491	-2.74565	0.0109992	esxN_2	EsaT-6 like protein EsxN_2"
MMARE11_31800	0.238869	-2.06571	0.0110064	wrbA	multimeric flavodoxin WrbA"
MMARE11_24970	0.242331	-2.04495	0.0110456		metal cation transporter p-type ATPase a, CtpF"
MMARE11_47980	0.314252	-1.67	0.0110571	yrbE4B	conserved hypothetical membrane protein YrbE4B"
MMARE11_41460	21.9601	4.45682	0.011138	metE	5-methyltetrahydropteroyltriglutamate--homocysteine
MMARE11_25300	0.411903	-1.27962	0.0112314		aldehyde dehydrogenase"
MMARE11_17970	2.81052	1.49084	0.0112999	hyaB	nickel/iron-hydrogenase I large subunit, HyaB"
MMARE11_47910	0.295701	-1.75779	0.0113038		conserved hypothetical alanine and valine rich
MMARE11_38010	0.332078	-1.59041	0.0113351		conserved hypothetical alanine-rich protein"
MMARE11_50570	0.408047	-1.29319	0.0114545		conserved protein"
MMARE11_40120	6.69741	2.7436	0.0115135	fgd2	F420-dependent glucose-6-phosphate dehydrogenase
MMARE11_21680	5.11994	2.35613	0.0115909	secG	protein-export membrane protein (translocase
MMARE11_20540	0.0782024	-3.67664	0.0115912		PE-PGRS family protein"
MMARE11_04990	2.72969	1.44873	0.011672		conserved membrane protein"
MMARE11_51410	11.3727	3.5075	0.0117074		PE-PGRS family protein"
MMARE11_18500	2.50651	1.32568	0.0117148	rpsO	30S ribosomal protein S15 RpsO"
MMARE11_24430	4.33713	2.11674	0.0117609		integral membrane drug efflux protein"
MMARE11_47220	5.20126	2.37886	0.0118001		aldehyde dehydrogenase"
MMARE11_04270	0.207565	-2.26837	0.0119171	echA1	enoyl-CoA hydratase EchA1"
MMARE11_46130	2.2058	1.1413	0.0120171		sensory histidine kinase UhpB"
MMARE11_00730	0.241787	-2.04819	0.0120451	rpsR1	30S ribosomal protein S18-1 RpsR1"
MMARE11_52820	0.597118	-0.743913	0.0120816		conserved hypothetical protein"
MMARE11_31340	3.27459	1.71132	0.0122152		conserved hypothetical secreted protein"
MMARE11_09870	0.332874	-1.58695	0.0122749	rplD	50S ribosomal protein L4, RplD"
MMARE11_10870	0.139259	-2.84415	0.0124517		PPE family protein"
MMARE11_08630	0.53057	-0.914385	0.0124772	sulP	transmembrane carbonic anhydrase, SulP"
MMARE11_48650	10.1058	3.33712	0.0126704	fadD3	fatty-acid-CoA ligase FadD3"
MMARE11_40640	6.29971	2.65529	0.0126739		transcriptional regulator"
MMARE11_16750	0.533771	-0.905708	0.0128983		conserved hypothetical protein"
MMARE11_21990	3.91505	1.96903	0.0129031	trxB1	thioredoxin TrxB1"
MMARE11_51840	0.525766	-0.927507	0.0130667	accD4_1	propionyl-CoA carboxylase beta chain 4 AccD4_1"
MMARE11_14620	0.105826	-3.24024	0.013196		conserved hypothetical protein"
MMARE11_32610	3.4704	1.7951	0.0133187	cyp124A1	cytochrome P450 124A1, Cyp124A1"
MMARE11_22330	0.435263	-1.20004	0.0133609		glycosyl transferase"
MMARE11_50920	0.4538	-1.13987	0.0133795	fadD15_1	long-chain-fatty-acid-CoA ligase FadD15_1"
MMARE11_43680	3.60357	1.84943	0.0133873		conserved hypothetical protein"
MMARE11_10240	0.513402	-0.961839	0.0134521		conserved protein"
MMARE11_31070	3.28356	1.71526	0.0134984		conserved protein"
MMARE11_23030	0.379338	-1.39844	0.0136387		inv protein"
MMARE11_46900	1.68003	0.748486	0.0136777	purF	amidophosphoribosyltransferase, PurF"
MMARE11_41340	0.136013	-2.87819	0.0138279		PPE family protein"
MMARE11_46310	0.250715	-1.99588	0.0138832		hypothetical membrane protein"
MMARE11_00960	0.277294	-1.85051	0.0139287	celA	cellobiohydrolase a (1,4-beta-cellobiosidase a)
MMARE11_36060	4.28754	2.10015	0.0141677	mbtJ	acetyl hydrolase MbtJ"
MMARE11_17530	0.45934	-1.12237	0.0142574	pyrH	uridylate kinase PyrH"
MMARE11_43400	0.400552	-1.31994	0.0143177	moaB2	pterin-4-alpha-carbinolamine dehydratase MoaB2"
MMARE11_24440	2.49516	1.31913	0.0143488		PPE family protein"
MMARE11_19220	2.88351	1.52783	0.0143581		conserved protein"
MMARE11_50440	2.19299	1.1329	0.0143756	asd	aspartate-semialdehyde dehydrogenase Asd"
MMARE11_23640	2.91665	1.54431	0.0144239		conserved protein"
MMARE11_15930	0.282255	-1.82493	0.0144881		tryptophan-rich sensory protein"
MMARE11_22320	0.450673	-1.14985	0.0145239	galE5	UDP-glucose 4-epimerase, GalE5"
MMARE11_17750	13.4045	3.74465	0.0146448		PPE family protein"
MMARE11_39360	3.96373	1.98686	0.014732		conserved hypothetical transport protein"
MMARE11_41200	1.83488	0.875684	0.0147512		conserved hypothetical protein"
MMARE11_42010	3.0202	1.59464	0.0147887		hemolysin-like protein"
MMARE11_31640	0.237833	-2.07198	0.0148078		integral membrane protein ABC transporter"
MMARE11_44350	0.190959	-2.38867	0.0148187		PE family protein"
MMARE11_11440	0.494084	-1.01717	0.0148406	metA	homoserine O-acetyltransferase MetA"
MMARE11_04740	18.8481	4.23634	0.0148717	nirD	nitrite reductase [NAD(P)H] small subunit NirD"
MMARE11_00060	0.549009	-0.865099	0.0148764	gyrA	DNA gyrase (subunit A) GyrA"
MMARE11_36400	1.77298	0.826172	0.0149205	rpsT	30S ribosomal protein S20 RpsT"
MMARE11_38940	5.74029	2.52112	0.015049		cobalamin adenosyltransferase"
MMARE11_04560	0.300922	-1.73254	0.0151833	lpqI	conserved lipoprotein LpqI"
MMARE11_31680	0.279944	-1.83679	0.0151936		conserved transmembrane transport protein-MmpL
MMARE11_39120	0.418452	-1.25687	0.0152268	thrC	threonine synthase ThrC"
MMARE11_32600	5.03621	2.33234	0.0152849	mmpS5_2	conserved transmembrane protein, MmpS5_2"
MMARE11_25140	11.6886	3.54703	0.0153928		hypothetical membrane protein"
MMARE11_24360	4.52627	2.17832	0.0154018		myo-inositol-1-phosphate synthase"
MMARE11_24220	4.55493	2.18743	0.0154368		putative domain protein"
MMARE11_35190	6.60561	2.72369	0.0154617		conserved hypothetical protein"
MMARE11_48860	6.65993	2.73551	0.0155324		conserved hypothetical membrane protein"
MMARE11_05050	0.536873	-0.897348	0.0155424		conserved protein"
MMARE11_26990	2.31021	1.20802	0.0157243		conserved hypothetical protein"
MMARE11_37830	3.84177	1.94177	0.0157313	cyp138A4	cytochrome P450 138A4 Cyp138A4"
MMARE11_15920	0.379831	-1.39657	0.0157954	phrI	DNA photolyase, PhrI"
MMARE11_22890	0.375961	-1.41134	0.0158427		ketoacyl reductase"
MMARE11_07260	7.54136	2.91482	0.0158614		conserved hypothetical protein"
MMARE11_03400	0.431714	-1.21185	0.0159971	pntAa	NAD(P) transhydrogenase (subunit alpha) PntAa"
MMARE11_41870	0.406785	-1.29766	0.0161396	glpX	fructose 1,6-bisphosphatase GlpX"
MMARE11_23950	0.417423	-1.26042	0.0161756	pks8	polyketide synthase, Pks8"
MMARE11_04950	7.23356	2.85471	0.0161858		PPE family protein, PPE3"
MMARE11_34120	0.164637	-2.60264	0.0162385		ferredoxin"
MMARE11_25900	7.25876	2.85972	0.0163239		PE family protein, PE19_1"
MMARE11_01280	9.97131	3.31778	0.016361		transcriptional regulatory protein (probably
MMARE11_22560	0.22827	-2.13119	0.0163709		nucleotidyltransferase"
MMARE11_43340	0.319335	-1.64686	0.0163733	moeA1	molybdopterin biosynthesis protein MoeA1"
MMARE11_18700	4.64672	2.21621	0.0164032		PPE family protein, PPE44"
MMARE11_19130	3.65318	1.86915	0.0165049	fadE20	acyl-CoA dehydrogenase FadE20"
MMARE11_13110	0.295611	-1.75823	0.0165192		Soj/ParA-related protein"
MMARE11_00220	0.534535	-0.903643	0.0165775	leuT	'tRNA-Ser(cag)'"
MMARE11_40680	15.9052	3.99143	0.0167653		conserved hypothetical protein"
MMARE11_05060	0.351796	-1.50719	0.0168135		conserved transmembrane protein"
MMARE11_52020	2.41893	1.27437	0.0168691		conserved hypothetical protein"
MMARE11_04690	2.28469	1.192	0.0169455		succinate dehydrogenase (membrane anchor
MMARE11_43430	3.02997	1.5993	0.0169709	mprA	mycobacterial persistence regulator MprA"
MMARE11_31660	0.147011	-2.766	0.0170302		conserved transmembrane transport protein-MmpL
MMARE11_25780	8.42135	3.07405	0.0170717		isochorismatase family protein"
MMARE11_51980	0.392467	-1.34936	0.0171726		acyltransferase"
MMARE11_42100	0.403861	-1.30807	0.017212	cbs	cystathionine beta-synthase Cbs"
MMARE11_27000	5.19796	2.37795	0.0173543		conserved hypothetical membrane protein"
MMARE11_51400	0.1462	-2.77398	0.0173665		PE-PGRS family protein"
MMARE11_46150	4.16353	2.05781	0.0174401		integral membrane protein"
MMARE11_03200	4.81908	2.26876	0.0174515		conserved protein"
MMARE11_13830	0.329837	-1.60018	0.0175498	nuoA	NADH dehydrogenase I (chain a) NuoA
MMARE11_49280	2.4436	1.28901	0.0177319		conserved hypothetical alanine and leucine-rich
MMARE11_03990	2.16736	1.11594	0.0177566		conserved secretory protein"
MMARE11_47530	0.30534	-1.71151	0.0177834	thrV	'tRNA-Thr(tgt)'"
MMARE11_30610	6.60488	2.72353	0.0179153		hypothetical protein"
MMARE11_28250	3.82994	1.93732	0.0180402		conserved hypothetical O-methyltransferase"
MMARE11_37370	0.292897	-1.77153	0.018061	scoA	succinyl-CoA:3-ketoacid-coenzyme A transferase
MMARE11_01300	8.41088	3.07226	0.0180747		conserved hypothetical protein"
MMARE11_40350	0.0617686	-4.01698	0.0180749		PE-PGRS family protein"
MMARE11_09940	0.437857	-1.19147	0.0180749	rpmC	50S ribosomal protein L29, RpmC"
MMARE11_20580	3.40983	1.7697	0.0181963	fadD9	fatty-acid-CoA ligase FadD9"
MMARE11_10510	10.6857	3.41761	0.0182161		PPE family protein"
MMARE11_51710	2.17582	1.12156	0.0182563		conserved hypothetical protein"
MMARE11_13690	0.284389	-1.81406	0.0182704		PPE family protein"
MMARE11_47940	0.341825	-1.54867	0.0182787	mce4D	MCE-family protein Mce4D"
MMARE11_44800	0.389458	-1.36046	0.0183026		conserved protein"
MMARE11_18770	0.157331	-2.66813	0.0183383	fadE34_1	acyl-CoA dehydrogenase FadE34_1"
MMARE11_30390	3.97706	1.9917	0.0183426		conserved hypothetical protein"
MMARE11_15530	0.168306	-2.57084	0.0183634		hypothetical protein"
MMARE11_26550	2.58144	1.36818	0.0183804		conserved hypothetical protein"
MMARE11_16680	0.41329	-1.27477	0.0185414	pca	pyruvate carboxylase Pca"
MMARE11_07420	2.47912	1.30983	0.0186448	icl	isocitrate lyase Icl"
MMARE11_31830	0.373653	-1.42023	0.0187065	ilvB1_2	acetolactate synthase (large subunit) IlvB1_2"
MMARE11_22090	0.409859	-1.2868	0.0187367		conserved protein"
MMARE11_18860	1.73288	0.793175	0.0188515	dapA	dihydrodipicolinate synthase DapA"
MMARE11_05030	0.38505	-1.37688	0.0188677	esxG	EsaT-6 like protein EsxG"
MMARE11_40260	0.539388	-0.890606	0.0188838	htrA	serine protease HtrA (DegP protein)"
MMARE11_11450	0.538964	-0.891739	0.0190798	metC	O-acetylhomoserine sulfhydrylase MetC"
MMARE11_21730	0.368007	-1.44219	0.0192203	opcA	OXPP cycle protein OpcA"
MMARE11_17310	0.470465	-1.08784	0.0192674	rplS	50S ribosomal protein L19 RplS"
MMARE11_48820	18.1321	4.18047	0.0194778		conserved hypothetical secreted protein"
MMARE11_51000	0.438715	-1.18864	0.0195726		non-ribosomal peptide synthetase"
MMARE11_30750	0.497508	-1.00721	0.0196429	mmpL4_5	conserved transmembrane transport protein
MMARE11_08390	4.91757	2.29795	0.0196572		conserved protein"
MMARE11_50430	4.11152	2.03967	0.0196616		conserved hypothetical secreted protein"
MMARE11_13410	0.348793	-1.51956	0.0196781		FK-506 binding protein, peptidyl-prolyl
MMARE11_06850	0.437418	-1.19292	0.01968	thiC	thiamine biosynthesis protein ThiC"
MMARE11_37090	0.121596	-3.03984	0.019794	moeY_1	molybdopterin biosynthesis protein MoeY_1"
MMARE11_04770	15.8007	3.98191	0.0198148		transcriptional regulatory protein"
MMARE11_45670	7.49162	2.90528	0.0198309		transcriptional regulatory protein (possibly
MMARE11_31010	0.350396	-1.51294	0.0198399		conserved proline rich membrane protein"
MMARE11_36170	0.443026	-1.17454	0.0199132	nirA_2	ferredoxin-dependent nitrite reductase, NirA_2"
MMARE11_36640	0.315298	-1.66521	0.0199958		adenylate or guanylate cyclase"
MMARE11_16820	0.29416	-1.76533	0.0200615	lppX	conserved lipoprotein LppX"
MMARE11_10930	0.501347	-0.99612	0.0201496	sigD	alternative RNA polymerase sigma-D factor, SigD"
MMARE11_20110	0.240902	-2.05348	0.0203264		conserved hypothetical protein"
MMARE11_26340	0.422171	-1.2441	0.020413	glcB	malate synthase G GlcB"
MMARE11_32050	0.0814845	-3.61733	0.0204627	rnpB	ribonuclease P RNA"
MMARE11_04750	3.51045	1.81166	0.0204963		conserved hypothetical protein"
MMARE11_09990	3.38065	1.7573	0.0205644		conserved protein"
MMARE11_33860	0.0850888	-3.55489	0.0206403		ketoacyl-acyl carrier protein synthase III"
MMARE11_30950	0.353388	-1.50068	0.0206432	murD	UDP-N-acetylmuramoylalanine-D-glutamate ligase
MMARE11_04180	4.92326	2.29961	0.0206974		conserved hypothetical membrane protein"
MMARE11_42570	0.302425	-1.72535	0.0210056	cyp138B1	cytochrome P450 138B1 Cyp138B1"
MMARE11_19070	0.17391	-2.52359	0.0210625		conserved hypothetical membrane protein"
MMARE11_44990	2.68024	1.42236	0.0210983		conserved protein"
MMARE11_23770	2.74949	1.45917	0.0211801		conserved hypothetical protein"
MMARE11_36760	0.468472	-1.09397	0.0212228	ndkA	nucleoside diphosphate kinase NdkA"
MMARE11_30740	0.333721	-1.58328	0.0212846	mbtH	conserved protein MbtH"
MMARE11_32330	0.532046	-0.910376	0.0214846		conserved protein"
MMARE11_46410	0.344029	-1.5394	0.0216368		marR-family transcriptional regulator"
MMARE11_20920	0.537793	-0.894878	0.021642	alaS	alanyl-tRNA synthetase AlaS"
MMARE11_44430	0.315716	-1.6633	0.0216467		conserved protein"
MMARE11_15940	0.311221	-1.68399	0.0218127		conserved transmembrane transport protein"
MMARE11_11250	0.605231	-0.724443	0.0218863		conserved hypothetical regultory protein"
MMARE11_42410	3.70747	1.89044	0.0218933		conserved hypothetical secreted protein"
MMARE11_37320	0.171161	-2.54657	0.0220102		conserved protein"
MMARE11_15370	14.4897	3.85696	0.0220919		hypothetical protein"
MMARE11_16340	0.391983	-1.35114	0.0222232	serA1	D-3-phosphoglycerate dehydrogenase SerA1"
MMARE11_27070	2.98385	1.57718	0.0222493		conserved hypothetical protein"
MMARE11_09690	0.398003	-1.32915	0.022269		ferredoxin reductase"
MMARE11_30010	2.17761	1.12275	0.0225951	tatC	sec-independent protein translocase
MMARE11_19080	6.09115	2.60671	0.0226855		conserved hypothetical membrane protein"
MMARE11_53100	0.361092	-1.46956	0.0229099	parB	chromosome partitioning protein ParB"
MMARE11_44360	0.229766	-2.12176	0.0229718		PPE family protein"
MMARE11_25790	4.58022	2.19542	0.0229793		conserved hypothetical protein"
MMARE11_05530	2.22651	1.15478	0.0230646		'tRNA-Gly(ccc)'"
MMARE11_29990	0.353245	-1.50126	0.0232619		conserved membrane protein"
MMARE11_17270	0.388344	-1.36459	0.0235538		conserved protein"
MMARE11_28290	2.59589	1.37623	0.0236353		cutinase precursor"
MMARE11_35860	2.22251	1.15219	0.0238989	phoH1	PhoH-like protein PhoH1"
MMARE11_06910	0.466143	-1.10115	0.0239832		transmembrane protein"
MMARE11_51020	6.73699	2.7521	0.0240007		conserved hypothetical protein"
MMARE11_09980	1.87148	0.904183	0.0240107	atsA	arylsulfatase AtsA"
MMARE11_18200	0.474806	-1.07459	0.0240521	nusA	N utilization substance protein a NusA"
MMARE11_48290	11.5928	3.53516	0.024131		conserved hypothetical protein"
MMARE11_20100	0.184811	-2.43588	0.0242904		PE-PGRS family protein"
MMARE11_23200	2.46779	1.30322	0.0243844	hisB	imidazole glycerol-phosphate dehydratase HisB"
MMARE11_31040	1.62329	0.698918	0.0244173		conserved hypothetical membrane protein"
MMARE11_23510	2.59824	1.37753	0.024444	leuV	'tRNA-Leu(caa)'"
MMARE11_03430	3.36282	1.74967	0.0245308		conserved hypothetical protein"
MMARE11_37020	0.444943	-1.16831	0.02461		conserved hypothetical protein"
MMARE11_46470	7.7703	2.95797	0.0247134		conserved hypothetical protein"
MMARE11_48270	6.00736	2.58673	0.0248414		conserved hypothetical protein"
MMARE11_09950	0.469653	-1.09033	0.0250394	rpsQ	30S ribosomal protein S17, RpsQ"
MMARE11_50580	2.28801	1.19409	0.0250446		conserved hypothetical dehydrogenase"
MMARE11_42560	0.34826	-1.52176	0.0252236		conserved transmembrane transport protein, MmpL"
MMARE11_19710	6.44741	2.68872	0.0252404		conserved hypothetical protein"
MMARE11_19670	2.64996	1.40597	0.0254346		conserved transmembrane protein"
MMARE11_00270	4.03546	2.01273	0.0256872		hypothetical protein"
MMARE11_05070	0.403352	-1.30989	0.0258463	mycP3	membrane-anchored mycosin MycP3"
MMARE11_21610	0.367975	-1.44232	0.025916	gap	glyceraldehyde 3-phosphate dehydrogenase Gap"
MMARE11_00990	0.27753	-1.84929	0.0259582		oxidoreductase"
MMARE11_31480	2.01081	1.00778	0.0259708	cbhK	carbohydrate kinase CbhK"
MMARE11_28660	4.46399	2.15833	0.0263235		1-aminocyclopropane-1-carboxylate deaminase"
MMARE11_48620	0.225126	-2.15119	0.0263319		PPE family protein"
MMARE11_18850	5.24036	2.38967	0.0263795	thyX	thymidylate synthase ThyX"
MMARE11_02860	2.04748	1.03385	0.0267011		conserved hypothetical secreted protein"
MMARE11_14340	0.461846	-1.11452	0.0271072		conserved protein"
MMARE11_43910	2.73974	1.45404	0.0271585	pstC2	phosphate-transport integral membrane ABC
MMARE11_00100	0.124906	-3.00108	0.0273104		conserved hypothetical protein"
MMARE11_25320	0.628166	-0.670783	0.0273839		conserved transmembrane ATP-binding protein ABC
MMARE11_26830	2.96934	1.57014	0.0275102		conserved hypothetical protein"
MMARE11_35750	0.405665	-1.30164	0.0275431	glyS	glycyl-tRNA synthetase GlyS"
MMARE11_20930	0.237592	-2.07344	0.0275472		conserved hypothetical protein"
MMARE11_50180	5.36587	2.42381	0.0276022		formate dehydrogenase, beta subunit,
MMARE11_03830	0.208271	-2.26346	0.0276334		conserved Mce associated protein"
MMARE11_03260	3.02063	1.59485	0.0276517		conserved hypothetical protein"
MMARE11_29120	4.37982	2.13087	0.0277926		conserved protein"
MMARE11_06950	0.46432	-1.10681	0.0278076		conserved hypothetical protein"
MMARE11_16280	7.91985	2.98547	0.0280548		conserved hypothetical protein"
MMARE11_10720	2.32303	1.21601	0.02808	glmS	glucosamine-fructose-6-phosphate
MMARE11_47690	1.87581	0.907512	0.0281266		conserved hypothetical protein"
MMARE11_08530	6.96157	2.79941	0.0281495	pimB	mannosyltransferase, PimB"
MMARE11_05160	0.497404	-1.00751	0.0282127		conserved exported protein"
MMARE11_51990	0.442889	-1.17498	0.0282603		acyltransferase"
MMARE11_50500	4.93521	2.30311	0.0283508		conserved hypothetical membrane protein"
MMARE11_01910	4.38603	2.13292	0.0283549	glyA2	serine hydroxymethyltransferase GlyA2"
MMARE11_04420	0.261302	-1.93621	0.0284387		PE-PGRS family protein"
MMARE11_30130	0.625013	-0.678042	0.0285447		ATPase"
MMARE11_42110	0.301141	-1.73149	0.0287034	lipU	lipase LipU"
MMARE11_45800	3.65726	1.87076	0.0287162		transcriptional regulatory protein"
MMARE11_05850	1.88176	0.912083	0.0290802	ansP1_1	L-asparagine permease AnsP1_1"
MMARE11_43350	0.463953	-1.10795	0.0290818	galU	UTP--glucose-1-phosphate uridylyltransferase
MMARE11_25050	0.339887	-1.55687	0.0291252		conserved secreted protein"
MMARE11_37570	1.70945	0.773532	0.0293184	lysU	tRNA-Lys"
MMARE11_00650	2.19927	1.13702	0.029377		conserved hypothetical protein"
MMARE11_25990	0.525616	-0.927919	0.0294077		conserved membrane protein"
MMARE11_20150	0.536435	-0.898525	0.0294453		conserved hypothetical protein"
MMARE11_52700	1.93244	0.950423	0.0297415	eccB1	type VII secretion EccB1
MMARE11_07500	3.24026	1.69611	0.0297457		conserved transmembrane protein"
MMARE11_34520	4.37349	2.12879	0.02993		conserved hypothetical protein"
MMARE11_40970	3.19489	1.67577	0.0299737		hypothetical protein"
MMARE11_30620	4.97854	2.31572	0.0299823		hypothetical protein"
MMARE11_26140	7.07629	2.82299	0.0300795		conserved hypothetical protein"
MMARE11_41800	6.64667	2.73263	0.0302731		conserved hypothetical protein"
MMARE11_02580	14.2517	3.83306	0.030339		conserved hypothetical protein"
MMARE11_23370	0.574018	-0.800832	0.0305871	trpB	tryptophan synthase, beta subunit TrpB"
MMARE11_06070	0.505331	-0.9847	0.0306075	coxL	carbon monoxyde dehydrogenase (large chain),
MMARE11_25040	0.34701	-1.52695	0.0307411	tex	transcriptional accessory protein Tex"
MMARE11_12370	0.412792	-1.27651	0.0309478	ctpC	metal cation-transporting p-type ATPase C CtpC"
MMARE11_36870	1.98576	0.989692	0.0311163		conserved integral membrane transport protein"
MMARE11_47030	5.21815	2.38354	0.0312444		hypothetical protein"
MMARE11_16350	0.4438	-1.17202	0.0313518	leuB	3-isopropylmalate dehydrogenase LeuB"
MMARE11_16240	2.66491	1.41409	0.0314094		oxidoreductase"
MMARE11_45080	0.338124	-1.56438	0.0314864		conserved hypothetical protein"
MMARE11_25840	0.589371	-0.762753	0.0315605		conserved membrane protein"
MMARE11_22570	0.375684	-1.41241	0.031623		predicted pyridoxal phosphate-dependent enzyme"
MMARE11_29310	0.156735	-2.6736	0.0317187		PE-PGRS family protein"
MMARE11_00580	2.84961	1.51077	0.0317459		transcriptional regulatory protein"
MMARE11_31470	1.98866	0.991796	0.0319366	asnB	asparagine synthetase AsnB"
MMARE11_00370	0.323792	-1.62686	0.0319501	amt_1	ammonium-transport integral membrane protein,
MMARE11_47050	25.312	4.66175	0.0319663		conserved hypothetical protein"
MMARE11_34130	0.116131	-3.10617	0.0319942		conserved hypothetical membrane protein"
MMARE11_08130	3.42766	1.77722	0.0320202	gabP	GabA permease (gamma-aminobutyrate permease)
MMARE11_53120	0.20342	-2.29747	0.0320954	gid	glucose-inhibited division protein B Gid"
MMARE11_20530	0.21261	-2.23372	0.0322332		PE-PGRS family protein"
MMARE11_42130	0.521734	-0.938613	0.0324662	fadA3	beta-ketoacyl CoA thiolase FadA3"
MMARE11_19340	3.14014	1.65083	0.0324989		PE-PGRS family protein"
MMARE11_15050	5.49403	2.45787	0.0325717		hypothetical protein"
MMARE11_00570	3.05908	1.6131	0.0329182		short-chain type oxidoreductase"
MMARE11_31940	0.226544	-2.14214	0.0329592		conserved hypothetical protein"
MMARE11_40170	4.78703	2.25913	0.0330196	sugA	sugar-transport integral membrane protein ABC
MMARE11_33500	2.71511	1.44101	0.0332138		PPE family protein, PPE61_1"
MMARE11_33510	2.71511	1.44101	0.0332622		PPE family protein, PPE61"
MMARE11_08100	0.187244	-2.417	0.0333317		universal stress protein UspA"
MMARE11_36670	4.16627	2.05876	0.0334968		Sir2-like regulatory protein"
MMARE11_35350	2.38992	1.25696	0.033699		conserved transmembrane ATP-binding protein ABC
MMARE11_08620	2.30713	1.2061	0.0337742	hspX	peptidase heat shock protein X, HspX"
MMARE11_18430	2.38278	1.25265	0.0337786		conserved hypothetical protein"
MMARE11_23980	3.316	1.72945	0.0337946	cyp139A3	cytochrome P450 139A3 Cyp139A3"
MMARE11_46770	0.186501	-2.42275	0.0340601	sseC2	sulphur metabolism protein, SseC2"
MMARE11_20670	3.63681	1.86267	0.0341453		Zn-dependent glyoxylase"
MMARE11_51200	3.17337	1.66602	0.0342187		conserved hypothetical membrane protein"
MMARE11_22940	3.376	1.75531	0.034219		hypothetical protein"
MMARE11_26430	3.67578	1.87805	0.0343154	ureA	urease gamma subunit UreA"
MMARE11_34560	0.299835	-1.73776	0.034357		conserved hypothetical secreted protein"
MMARE11_21800	2.71598	1.44147	0.0344886		transcriptional activator protein"
MMARE11_43150	0.168598	-2.56834	0.0351373		PPE family protein"
MMARE11_07950	0.210715	-2.24664	0.0351836	hemB	delta-aminolevulinic acid dehydratase HemB"
MMARE11_01540	25.2211	4.65656	0.0352034		glutamate decarboxylase"
MMARE11_03050	4.1891	2.06664	0.0354879		flavodoxin oxidoreductase"
MMARE11_26970	5.16576	2.36898	0.0355349		conserved hypothetical protein"
MMARE11_24250	0.276312	-1.85563	0.0355629		phosphatase"
MMARE11_47260	0.454429	-1.13787	0.0356292	purB	adenylosuccinate lyase, PurB"
MMARE11_23040	3.51935	1.81531	0.0356687		conserved hypothetical membrane protein"
MMARE11_37010	0.438173	-1.19043	0.0356738		conserved protein"
MMARE11_22270	0.272548	-1.87542	0.0356914	lipL	conserved hypothetical esterase LipL"
MMARE11_13100	0.386968	-1.36971	0.0357625	gpm2	phosphoglycerate mutase Gpm2"
MMARE11_21670	3.74812	1.90617	0.035805		conserved hypothetical membrane protein"
MMARE11_46980	3.23718	1.69474	0.0360673		conserved hypothetical protein"
MMARE11_23800	0.543567	-0.87947	0.0361483	pheT	phenylalanyl-tRNA synthetase, beta chain PheT"
MMARE11_07090	1.37956	0.464209	0.0361837	groEL2	60 kDa chaperonin 2 GroEL2"
MMARE11_31430	0.424329	-1.23675	0.0362937		conserved transmembrane protein"
MMARE11_03250	2.09426	1.06644	0.036304		transcriptional regulatory protein (possibly
MMARE11_19590	0.436528	-1.19585	0.0363603		conserved hypothetical protein"
MMARE11_05660	0.312974	-1.67588	0.0363696		PE-PGRS family protein, PE_PGRS9_5"
MMARE11_16080	12.4856	3.64219	0.0365062		conserved hypothetical membrane protein"
MMARE11_02140	2.87556	1.52384	0.0365368		dioxygenase"
MMARE11_30100	2.88104	1.52659	0.0365698		conserved protein"
MMARE11_21690	4.11854	2.04213	0.036618	ppc	phosphoenolpyruvate carboxylase, Ppc"
MMARE11_08890	4.24697	2.08643	0.03671		oxidoreductase"
MMARE11_30070	0.569011	-0.813472	0.0368345	prcB	proteasome (beta subunit) PrcB"
MMARE11_52240	0.419965	-1.25166	0.0370361	hns	histone-like protein Hns"
MMARE11_31650	0.304673	-1.71467	0.0372108		ATP-binding protein ABC transporter"
MMARE11_46510	0.216951	-2.20456	0.0374208		conserved hypothetical protein"
MMARE11_09960	3.50756	1.81047	0.0374289		transcriptional regulator BetI"
MMARE11_04360	0.305827	-1.70921	0.0379275		glycosyltransferase"
MMARE11_51940	2.22128	1.15139	0.037971	glf	UDP-galactopyranose mutase Glf"
MMARE11_12410	0.262871	-1.92757	0.0380852	rmlD	dTDP-6-deoxy-L-lyxo-4-hexulose reductase RmlD"
MMARE11_34380	0.571415	-0.807389	0.0381733	htpG	chaperone protein HtpG"
MMARE11_23820	0.334065	-1.5818	0.0384157		PE-PGRS family protein"
MMARE11_35570	3.60265	1.84906	0.0384272		conserved hypothetical protein"
MMARE11_39800	3.05601	1.61165	0.0384712		conserved transmembrane ATP-binding protein ABC
MMARE11_48250	2.57293	1.36341	0.0385051	kshA	conserved hypothetical oxidoreductase"
MMARE11_27030	2.86242	1.51724	0.0386348	cyp125A6	cytochrome P450 125A6 Cyp125A6"
MMARE11_04170	7.24044	2.85608	0.0388054	echA8_4	enoyl-CoA hydratase, EchA8_4"
MMARE11_07640	2.22739	1.15536	0.0389871	senX3	two-component sensor histidine kinase SenX3"
MMARE11_22120	0.52966	-0.916862	0.0394874	inhA	enoyl-[acyl-carrier-protein] reductase, InhA"
MMARE11_17210	2.90353	1.53781	0.039493	pknI	transmembrane serine/threonine-protein kinase I
MMARE11_40280	0.609849	-0.713475	0.039709	sigE	alternative RNA polymerase sigma factor SigE"
MMARE11_13810	0.43574	-1.19846	0.0398996	nuoC	NADH dehydrogenase I (chain C) NuoC
MMARE11_28360	4.23569	2.0826	0.0400777	furA	ferric uptake regulation protein FurA"
MMARE11_48680	5.39018	2.43033	0.0401355	fadE33	acyl-CoA dehydrogenase FadE33"
MMARE11_14290	0.243177	-2.03992	0.0404776	devR	two-component transcriptional regulatory protein
MMARE11_47950	0.376519	-1.4092	0.0406601	mce4C	MCE-family protein Mce4C"
MMARE11_16840	1.54007	0.622992	0.0407012	fadD28	fatty acyl-AMP ligase FadD28"
MMARE11_42360	0.348194	-1.52204	0.0408255		conserved hypothetical protein"
MMARE11_48450	3.95786	1.98472	0.0410438	ddn	conserved hypothetical protein"
MMARE11_31110	2.55381	1.35265	0.0412642	pknL	transmembrane serine/threonine-protein kinase L
MMARE11_18560	0.569343	-0.81263	0.0412928	ald	secreted L-alanine dehydrogenase Ald (40 kDa
MMARE11_48980	0.722023	-0.469883	0.0413134		conserved transcriptional regulatory protein"
MMARE11_03190	0.283958	-1.81625	0.0413616		oxidoreductase"
MMARE11_07600	0.566142	-0.820763	0.0414195		transcriptional regulatory protein"
MMARE11_48110	2.39145	1.25789	0.04159	fadD19_1	fatty-acid-CoA ligase FadD19_1"
MMARE11_48260	4.79986	2.26299	0.041813		conserved hypothetical protein"
MMARE11_06200	1.97564	0.982321	0.0418374	mgtE	Mg2+ transport transmembrane protein MgtE"
MMARE11_48120	2.84752	1.50971	0.0418928	echA19	enoyl-CoA hydratase EchA19"
MMARE11_16970	1.51549	0.599786	0.041954	fadD26	fatty acyl-AMP ligase FadD26, DIM biosynthesis
MMARE11_43800	5.34353	2.41779	0.0419571		conserved hypothetical oxidoreductase"
MMARE11_16910	0.380069	-1.39567	0.0420793	drrA	daunorubicin-DIM-transport ATP-binding protein
MMARE11_47470	3.81674	1.93234	0.0421462		conserved hypothetical protein"
MMARE11_44850	1.70059	0.766033	0.0425185	fadE10	acyl-CoA dehydrogenase FadE10"
MMARE11_13750	0.226927	-2.1397	0.0425312	nuoI	NADH dehydrogenase I (chain I) NuoI
MMARE11_14300	0.188476	-2.40754	0.0428336	devS	two-component sensor histidine kinase DevS"
MMARE11_14680	3.12669	1.64464	0.042842		transcriptional regulatory protein"
MMARE11_21590	0.502585	-0.99256	0.0434287		dehydrogenase"
MMARE11_51820	0.394873	-1.34054	0.0435471	fadE35	acyl-CoA dehydrogenase FadE35"
MMARE11_27370	5.01099	2.32509	0.0436007		ArsR-type repressor"
MMARE11_09120	1.8736	0.90581	0.0439578	echA3	enoyl-CoA hydratase, EchA3"
MMARE11_43940	5.38551	2.42908	0.0439742		conserved hypothetical protein"
MMARE11_24950	0.424133	-1.23741	0.0440132	pknK	serine/threonine-protein kinase transcriptional
MMARE11_26800	2.52645	1.33711	0.0440241	echA8_6	enoyl-CoA hydratase, EchA8_6"
MMARE11_46650	0.532917	-0.908017	0.0444434		transcriptional regulator"
MMARE11_48840	2.12711	1.08889	0.0444721	kstR	transcriptional regulatory protein
MMARE11_48840	2.12711	1.08889	0.0445347	kstR	transcriptional regulatory protein
MMARE11_47820	2.76901	1.46937	0.0447882	echA13_1	enoyl-CoA hydratase EchA13_1"
MMARE11_03890	2.39515	1.26012	0.0450435	sigG	alternative RNA polymerase sigma factor SigG"
MMARE11_10350	1.89598	0.922942	0.0451994	fadE9	acyl-CoA dehydrogenase, FadE9"
MMARE11_43890	0.525835	-0.927319	0.0452947	pknD	transmembrane serine/threonine-protein kinase D
MMARE11_52710	1.83919	0.879073	0.0454306	eccCa1	type VII secretion EccCa1
MMARE11_52780	0.559543	-0.837678	0.0455095	eccD1	type VII secretion EccD1
MMARE11_25260	2.02453	1.01759	0.0455706	pknF_3	anchored-membrane serine/threonine-protein
MMARE11_48020	2.7477	1.45823	0.0456441	fadE26	acyl-CoA dehydrogenase FadE26"
MMARE11_48810	3.33038	1.73569	0.0456736	hmp	flavodoxin reductase Hmp"
MMARE11_48420	2.37993	1.25092	0.0457249	cyp125A7	cytochrome P450 125A7 Cyp125A7"
MMARE11_39030	1.76083	0.816258	0.0458713	atpB	ATP synthase a chain AtpB"
MMARE11_13730	0.227837	-2.13392	0.0460415	nuoK	NADH dehydrogenase I (chain K) NuoK
MMARE11_40630	2.91783	1.5449	0.0461111	ltp2	keto acyl-CoA thiolase, Ltp2"
MMARE11_48030	2.35875	1.23802	0.0463751	fadE27	acyl-CoA dehydrogenase FadE27"
MMARE11_16880	1.55747	0.639204	0.0463995	papA5	conserved polyketide synthase associated protein
MMARE11_41470	1.83919	0.879073	0.046499		conserved hypothetical membrane protein"
MMARE11_40590	2.49126	1.31687	0.0465106	aldA_1	NAD-dependent aldehyde dehydrogenase, AldA_1"
MMARE11_52840	0.461571	-1.11537	0.0466444	eccE1	type VII secretion EccE1
MMARE11_48040	2.92615	1.549	0.0467663	fadD17	fatty-acid-CoA synthetase FadD17"
MMARE11_38440	2.07087	1.05024	0.0468023	irtA	transmembrane ATP-binding protein ABC
MMARE11_21560	2.05163	1.03677	0.0471762		conserved hypothetical protein"
MMARE11_48170	2.48822	1.31512	0.0471816	ltp4	lipid transfer protein or keto acyl-CoA thiolase
MMARE11_44650	1.35368	0.436882	0.047213	gltA2	citrate synthase I GltA2"
MMARE11_52850	0.679629	-0.557182	0.047488	mycP1	membrane-anchored serine protease (mycosin),MycP1
MMARE11_48830	1.98689	0.990514	0.0476751	fadE34	acyl-CoA dehydrogenase FadE34"
MMARE11_48670	2.67603	1.42009	0.0476773	fadE32	acyl-CoA dehydrogenase FadE32"
MMARE11_23310	1.89132	0.919396	0.0478371	pknF_1	anchored-membrane serine/threonine-protein
MMARE11_48350	2.62237	1.39087	0.0479082	hsd4B	conserved hypothetical dehydratase (MaoC-like)"
MMARE11_52690	0.809577	-0.30476	0.047913	eccA1	type VII secretion protein EccA1
MMARE11_10300	2.63104	1.39563	0.047954	sigL	alternative RNA polymerase sigma factor (RpoE),
MMARE11_02410	1.80198	0.849584	0.0480589	fadD10	fatty-acid-CoA ligase FadD10"
MMARE11_48150	0.555338	-0.848561	0.048368		coenzyme F420-dependent oxidoreductase"
MMARE11_48340	2.05994	1.0426	0.048617	kstD	conserved hypothetical dehydrogenase"
MMARE11_00170	0.577997	-0.790866	0.0487377	pknA	serine/threonine-protein kinase a PknA"
MMARE11_48460	2.23082	1.15757	0.0488834		short-chain type dehydrogenase/reductase"
MMARE11_48770	1.97402	0.981134	0.0488936	hsaB	conserved hypothetical oxidase"
MMARE11_18710	2.15681	1.1089	0.0490717	fadD13_1	fatty acid-CoA ligase FadD13_1"
MMARE11_10820	0.514571	-0.958558	0.0490791	gcp	O-sialoglycoprotein endopeptidase Gcp
MMARE11_39850	2.05144	1.03664	0.0490853	pknF	anchored-membrane serine/threonine-protein
MMARE11_53040	4.85155	2.27844	0.049225	sigM	alternative RNA polymerase sigma factor SigM"
MMARE11_42160	0.596938	-0.744348	0.0493324	echA8	enoyl-CoA hydratase EchA8"
MMARE11_31410	0.613013	-0.70601	0.0494077	qcrA	Rieske iron-sulfur protein QcrA"
MMARE11_19720	2.06231	1.04426	0.0494264		exported alanine and valine rich protein"
MMARE11_48640	2.10012	1.07047	0.0495045	fadE30	acyl-CoA dehydrogenase FadE30"
MMARE11_43930	3.64489	1.86587	0.0495911		short-chain type dehydrogenase/reductase"

## Sheet: ESX1_ESX1_INT (S7)
Complete list of genes of which expression is significantly changed in M. marinum eccCb1 transposon mutant strain during infection of macrophages vs growth in 7H9 culture medium. P<0.05
Gene ID	foldChange	log2FoldChange	pval	Product
MMARE11_46350	0.00663906	-7.2348	0	geranylgeranyl pyrophosphate synthase CrtE"
MMARE11_46400	0.0137775	-6.18154	0	conserved transmembrane transport protein
MMARE11_01780	0.24287	-2.04174	0	conserved hypothetical EsxB-like protein,
MMARE11_49730	11.8707	3.56933	0	hypothetical protein"
MMARE11_29140	54.4719	5.76744	0	molecular chaperone (small heat shock protein)"
MMARE11_39760	79.2534	6.3084	0	ESX-1 secretion-associated protein A, EspA"
MMARE11_13330	95.873	6.58305	0	transcriptional regulatory protein Whib-like WhiB7
MMARE11_35450	219.317	7.77688	0	integral membrane nitrite extrusion protein
MMARE11_10530	23.8529	4.57609	0	conserved hypothetical membrane protein"
MMARE11_39770	103.313	6.69087	5.55e-15	conserved hypothetical protein"
MMARE11_24450	20.7676	4.37626	2.51e-14	PPE family protein, PPE23"
MMARE11_46160	55.0993	5.78396	2.8e-14	PE-PGRS family protein"
MMARE11_13320	9.92609	3.31122	5.51e-14	hypothetical protein"
MMARE11_40510	1752.08	10.7749	1.1e-13	conserved integral membrane transport protein"
MMARE11_25880	52.5172	5.71472	2.69e-13	hypothetical protein"
MMARE11_01770	0.208995	-2.25846	3.14e-13	6 kDa culture filtrate antigen EsxA_1 (early
MMARE11_35470	66.1783	6.04829	3.48e-13	formate dehydrogenase H FdhF"
MMARE11_47130	55.2595	5.78815	4.73e-13	conserved hypothetical integral membrane
MMARE11_08940	0.0199802	-5.64528	3.4e-12	conserved hypothetical protein"
MMARE11p_00900	41.4398	5.37294	5.2e-12	hypothetical protein"
MMARE11_44970	562.429	9.13553	6.18e-12	conserved hypothetical protein"
MMARE11_36470	22.7964	4.51074	9.17e-12	enhanced intracellular survival protein Eis"
MMARE11_19270	3.84728	1.94384	1.13e-11	RNA polymerase sigma factor SigB"
MMARE11_22690	3.35178	1.74493	1.25e-11	hypothetical protein"
MMARE11_12800	40.8233	5.35132	2.59e-11	oxidoreductase"
MMARE11_46530	0.290935	-1.78123	5.95e-11	cold shock protein a, CspA"
MMARE11_46360	0.00144525	-9.43446	1.05e-10	phytoene dehydrogenase CrtI"
MMARE11_17760	406.196	8.66603	1.21e-10	conserved hypothetical membrane protein"
MMARE11_02840	57.1251	5.83605	1.33e-10	conserved hypothetical protein"
MMARE11_52330	0.070447	-3.82732	1.64e-10	conserved hypothetical protein"
MMARE11_01760	0.212134	-2.23695	2.17e-10	10 kDa culture filtrate antigen EsxB_1"
MMARE11_21230	0.20461	-2.28905	2.77e-10	integration host factor MihF"
MMARE11_05680	8.21619	3.03847	5.2e-10	aminotransferase AlaT"
MMARE11_27560	11.0064	3.46027	6.46e-10	phosphotransferase"
MMARE11_23810	184.788	7.52973	6.75e-10	PE-PGRS family protein"
MMARE11_18010	12.3474	3.62614	6.96e-10	high-affinity nickel permease, HoxN"
MMARE11_02850	13.5613	3.76142	8.26e-10	divalent cation-transport integral membrane
MMARE11_09970	18.9625	4.24508	8.99e-10	hypothetical protein"
MMARE11_19120	6.94291	2.79554	1.26e-09	GTP-binding protein HflX"
MMARE11_35610	0.15645	-2.67623	1.5e-09	EsaT-6 like protein EsxN_3"
MMARE11_04620	3.11071	1.63724	1.51e-09	acyl-CoA dehydrogenase FadE5"
MMARE11_21360	51.6066	5.68948	1.55e-09	methyltransferase"
MMARE11_06740	0.14819	-2.75448	1.66e-09	conserved hypothetical membrane protein"
MMARE11_35100	10.9669	3.45509	1.75e-09	hypothetical protein"
MMARE11_22060	0.185076	-2.43381	2.03e-09	mycobacterial invasion and intracellular
MMARE11_29150	13.5893	3.7644	2.22e-09	GTP cyclohydrolase I FolE_1"
MMARE11_10090	0.195536	-2.3545	2.34e-09	30S ribosomal protein S5, RpsE"
MMARE11_35630	0.0465814	-4.4241	2.45e-09	conserved hypothetical protein"
MMARE11_09470	0.282041	-1.82602	2.55e-09	DNA-directed RNA polymerase, beta chain, RpoC"
MMARE11_43370	9.97724	3.31864	3.1e-09	conserved hypothetical serine rich protein"
MMARE11_35620	0.112266	-3.155	4.34e-09	EsaT-6 like protein EsxP_2"
MMARE11_10910	21.9158	4.4539	4.59e-09	WhiB-like regulatory protein, WhiB3"
MMARE11_03740	0.179972	-2.47416	1.45e-08	conserved hypothetical integral membrane protein
MMARE11_39000	0.278404	-1.84475	1.6e-08	ATP synthase delta chain AtpH"
MMARE11_51810	0.0439915	-4.50663	1.87e-08	conserved hypothetical membrane protein"
MMARE11_19310	4.86029	2.28104	1.95e-08	conserved hypothetical protein"
MMARE11_03730	0.205761	-2.28096	2.34e-08	conserved hypothetical integral membrane protein
MMARE11_19300	5.12681	2.35806	3.58e-08	conserved membrane protein"
MMARE11_50450	4.42025	2.14413	3.66e-08	aspartate kinase Ask"
MMARE11_46940	8.97518	3.16594	3.84e-08	UDP-glucose-4-epimerase, CpsY"
MMARE11_30900	0.164146	-2.60695	3.99e-08	cell division protein FtsZ"
MMARE11_13670	0.0725636	-3.78461	4.17e-08	PPE family protein"
MMARE11_04720	17.79	4.15299	4.46e-08	heat shock protein Hsp"
MMARE11_04150	3.18698	1.67219	5.39e-08	iron-regulated phosphoenolpyruvate carboxykinase
MMARE11_16810	0.277323	-1.85036	5.41e-08	polyketide synthase Pks15/1"
MMARE11_46140	22.9712	4.52175	6.67e-08	'pyruvate dehydrogenase (acetyl-transferring) E1
MMARE11_35290	13.4478	3.74929	7.87e-08	ornithine aminotransferase RocD1 and RocD2"
MMARE11_34620	0.0440111	-4.50599	8.29e-08	PPE family protein, PPE5"
MMARE11_14280	0.0693432	-3.8501	1.13e-07	conserved hypothetical membrane protein"
MMARE11_02980	0.132027	-2.9211	1.17e-07	secreted antigen 85-C FbpC"
MMARE11_04780	35.7863	5.16133	1.21e-07	integral membrane nitrite extrusion protein
MMARE11_39930	25.7718	4.68772	1.44e-07	conserved hypothetical integral membrane
MMARE11_35300	31.1353	4.96048	1.68e-07	conserved hypothetical protein"
MMARE11_26490	3.77238	1.91547	1.77e-07	NADH dehydrogenase Ndh"
MMARE11_03770	0.275752	-1.85856	1.79e-07	MCE-family protein Mce1C"
MMARE11_49230	0.276456	-1.85488	1.81e-07	iron-regulated Lsr2 protein precursor"
MMARE11_22620	0.193529	-2.36938	1.93e-07	probable polyketide synthase Pks5"
MMARE11_37690	0.410415	-1.28484	2.03e-07	fatty acid synthase Fas"
MMARE11_23500	8.77964	3.13416	2.05e-07	conserved hypothetical membrane protein"
MMARE11_33970	20.2438	4.33941	2.06e-07	conserved hypothetical secreted protein"
MMARE11_07300	0.114381	-3.12809	2.07e-07	aldehyde dehydrogenase, PutA_1"
MMARE11_42610	9.34885	3.22479	2.14e-07	hypothetical membrane protein"
MMARE11_12810	18.2171	4.18722	2.15e-07	linoleoyl-CoA desaturase, DesA3"
MMARE11_46370	0.0242438	-5.36624	2.25e-07	phytoene synthase, CrtB"
MMARE11_20170	0.0344699	-4.85852	2.31e-07	conserved hypothetical protein"
MMARE11_38990	0.376911	-1.4077	2.45e-07	ATP synthase alpha chain AtpA"
MMARE11_47320	0.0432359	-4.53163	2.64e-07	conserved hypothetical protein"
MMARE11_20140	0.0826156	-3.59744	2.74e-07	long-chain-fatty-acid-CoA ligase, FadD11_1"
MMARE11_28670	22.6515	4.50154	3.11e-07	conserved protein"
MMARE11_22700	4.97184	2.31378	3.33e-07	conserved hypothetical protein"
MMARE11_39790	9.3516	3.22521	4.37e-07	transmembrane serine/threonine-protein kinase H,
MMARE11_06730	0.152599	-2.71218	4.72e-07	conserved hypothetical membrane protein"
MMARE11_03750	0.30756	-1.70106	5.15e-07	MCE-family protein Mce1A"
MMARE11_09640	0.29699	-1.75151	5.36e-07	30S ribosomal protein S7, RpsG"
MMARE11_50550	0.236209	-2.08186	5.44e-07	conserved protein"
MMARE11_35690	0.0533156	-4.2293	5.58e-07	EsaT-6 like protein EsxP_3"
MMARE11_35700	0.0533156	-4.2293	5.85e-07	EsaT-6 like protein EsxP_4"
MMARE11_33130	0.0252736	-5.30622	5.86e-07	conserved hypothetical protein"
MMARE11_36140	10.3207	3.36747	6.3e-07	conserved hypothetical protein"
MMARE11_51340	0.206386	-2.27658	6.49e-07	19 kDa lipoprotein antigen precursor LpqH"
MMARE11_29170	0.0813204	-3.62024	6.51e-07	ferredoxin FdxA_2"
MMARE11_22530	0.243903	-2.03562	6.53e-07	conserved hypothetical protein"
MMARE11_13340	4.86435	2.28225	6.61e-07	conserved ATP-binding protein ABC transporter"
MMARE11_10520	44.2812	5.46862	7e-07	PPE family protein"
MMARE11_52210	7.99697	2.99945	7.11e-07	conserved protein"
MMARE11_31800	0.182757	-2.452	7.95e-07	multimeric flavodoxin WrbA"
MMARE11_42440	10.8161	3.43511	8.88e-07	conserved hypothetical protein"
MMARE11_15540	8.819	3.14061	9.12e-07	conserved hypothetical protein"
MMARE11_38970	0.377666	-1.40482	9.22e-07	ATP synthase beta chain AtpD"
MMARE11_21280	6.02084	2.58997	9.4e-07	conserved hypothetical secreted protein"
MMARE11_43640	4.90711	2.29487	1.01e-06	conserved hypothetical protein"
MMARE11_24820	0.181611	-2.46108	1.11e-06	'RNA chaperone/anti-terminator'"
MMARE11_10070	0.229238	-2.12508	1.14e-06	50S ribosomal protein L6, RplF"
MMARE11_49940	0.136108	-2.87718	1.21e-06	transcriptional regulatory protein Whib-like
MMARE11_09860	0.29547	-1.75892	1.27e-06	50S ribosomal protein L3 RplC"
MMARE11_10080	0.17285	-2.53241	1.31e-06	50S ribosomal protein L18, RplR"
MMARE11_28260	4.01011	2.00364	1.32e-06	hypothetical protein"
MMARE11_04850	0.237473	-2.07417	1.36e-06	fatty-acid-CoA ligase FadD2"
MMARE11_43320	0.300932	-1.73249	1.42e-06	conserved hypothetical transmembrane protein"
MMARE11_19330	9.74254	3.2843	1.53e-06	conserved hypothetical protein"
MMARE11_13700	0.197223	-2.3421	1.64e-06	NADH dehydrogenase I (chain N) NuoN
MMARE11_13720	0.156961	-2.67152	1.67e-06	NADH dehydrogenase I (chain L) NuoL
MMARE11_33990	0.226051	-2.14528	1.67e-06	conserved hypothetical protein"
MMARE11_51420	7.90261	2.98233	1.98e-06	O-methyltransferase"
MMARE11_39100	0.257511	-1.95729	2.08e-06	transcription termination factor Rho"
MMARE11_47140	20.3376	4.34607	2.1e-06	conserved hypothetical protein"
MMARE11_05860	2.67601	1.42008	2.13e-06	chaperone protein DnaK"
MMARE11_29480	0.373036	-1.42261	2.15e-06	polyketide synthase, Pks12"
MMARE11_35670	0.129423	-2.94983	2.25e-06	EsaT-6 like protein EsxN_4"
MMARE11_35680	0.129423	-2.94983	2.35e-06	EsaT-6 like protein EsxN_5"
MMARE11_38980	0.356976	-1.4861	2.87e-06	ATP synthase gamma chain AtpG"
MMARE11_46800	10.1874	3.34871	2.89e-06	conserved hypothetical protein"
MMARE11_10360	7.50245	2.90736	2.91e-06	methylmalonate semialdehyde dehydrogenase, MmsA"
MMARE11_03760	0.32346	-1.62834	2.96e-06	MCE-family protein Mce1B"
MMARE11_25890	16.7318	4.06452	3.15e-06	PPE family protein, PPE25"
MMARE11_21880	2.75891	1.4641	3.28e-06	conserved protein"
MMARE11_36150	12.532	3.64755	3.36e-06	conserved membrane permease"
MMARE11_29720	0.0241114	-5.37414	3.57e-06	conserved membrane transport protein, MmpS4_1"
MMARE11_35440	36.9583	5.20782	3.71e-06	methylase"
MMARE11_29500	2.59637	1.3765	3.87e-06	conserved hypothetical protein"
MMARE11_22550	0.154379	-2.69545	4.02e-06	glycosyltransferase, WcaA"
MMARE11_07780	0.331901	-1.59117	4.08e-06	UDP-glucose 4-epimerase GalE2"
MMARE11_41630	18.3891	4.20078	4.28e-06	conserved hypothetical protein"
MMARE11_43620	0.268361	-1.89775	4.53e-06	succinyl-CoA synthetase (alpha chain) SucD"
MMARE11_49880	0.400581	-1.31983	4.66e-06	conserved regulatory protein"
MMARE11_40550	4.46727	2.15939	4.94e-06	transcriptional regulatory protein"
MMARE11_26250	0.385071	-1.3768	5.99e-06	conserved protein"
MMARE11_22070	0.136477	-2.87327	7.83e-06	mycobacterial invasion and intracellular
MMARE11_22080	0.28354	-1.81837	8.12e-06	transcriptional regulatory protein, MoxR1"
MMARE11_22540	0.186786	-2.42054	8.14e-06	acetolactate synthase (large subunit) IlvB1_3"
MMARE11_33230	24.2183	4.59802	8.31e-06	phosphate-transport permease PitB"
MMARE11_09660	0.409673	-1.28746	8.33e-06	iron-regulated elongation factor Ef-tu, Tuf"
MMARE11_43630	0.352493	-1.50433	8.5e-06	succinyl-CoA synthetase (beta chain) SucC"
MMARE11_46390	0.0131501	-6.24878	8.9e-06	lycopene cyclase, CrtYd"
MMARE11_26860	7.57479	2.92121	8.94e-06	conserved hypothetical amidase"
MMARE11_09910	0.218035	-2.19737	9.37e-06	50S ribosomal protein L22, RplV"
MMARE11_12910	16.9249	4.08108	9.55e-06	conserved hypothetical membrane protein"
MMARE11_37330	0.0856472	-3.54545	9.97e-06	acyl-CoA dehydrogenase FadE19"
MMARE11_36460	18.806	4.23312	1.01e-05	conserved hypothetical membrane protein"
MMARE11_13780	0.196545	-2.34707	1.1e-05	NADH dehydrogenase I (chain F) NuoF
MMARE11_23190	5.27476	2.3991	1.13e-05	histidinol-phosphate aminotransferase HisC1"
MMARE11_19320	4.80257	2.26381	1.16e-05	conserved hypothetical protein"
MMARE11_12820	4.95244	2.30814	1.17e-05	linoleoyl-CoA desaturase, DesA3_1"
MMARE11_30890	0.204065	-2.2929	1.23e-05	conserved membrane protein YfiH"
MMARE11_13740	0.111021	-3.1711	1.33e-05	NADH dehydrogenase I (chain J) NuoJ
MMARE11_16050	0.280163	-1.83566	1.35e-05	electron transfer flavoprotein (beta-subunit)
MMARE11_29010	16.9158	4.0803	1.39e-05	transcriptional regulatory protein (probably
MMARE11_08660	0.0608629	-4.03829	1.39e-05	trypsin-like serine protease"
MMARE11_07000	20.611	4.36534	1.4e-05	MFS transporter"
MMARE11_09650	0.559164	-0.838657	1.41e-05	elongation factor G, FusA1"
MMARE11_31810	0.114411	-3.1277	1.45e-05	conserved hypothetical protein"
MMARE11_34190	0.211908	-2.23849	1.5e-05	hypothetical protein"
MMARE11_01310	5.6656	2.50223	1.51e-05	conserved hypothetical membrane protein"
MMARE11_25800	7.64226	2.934	1.53e-05	conserved hypothetical membrane protein"
MMARE11_33890	0.108485	-3.20443	1.63e-05	conserved hypothetical membrane protein"
MMARE11_21970	0.347619	-1.52442	1.68e-05	cation transporter p-type ATPase D CtpD"
MMARE11_51890	0.552816	-0.85513	1.74e-05	secreted antigen 85-A FbpA"
MMARE11_30770	0.340841	-1.55283	1.79e-05	non-ribosomal peptide synthetase"
MMARE11_26260	0.32733	-1.61118	1.79e-05	conserved hypothetical regulatory protein"
MMARE11_13770	0.304189	-1.71696	1.86e-05	NADH dehydrogenase I (chain G) NuoG
MMARE11_11960	0.211641	-2.24031	1.92e-05	metal cation transporting p-type ATPase CtpH_1"
MMARE11_08410	3.17604	1.66723	1.97e-05	low-affinity inorganic phosphate transporter,
MMARE11_52140	2.34403	1.22899	2e-05	bacterioferritin BfrB"
MMARE11_22760	0.203051	-2.30009	2.01e-05	conserved hypothetical protein"
MMARE11_22010	3.07995	1.62291	2.13e-05	ATP-binding protein ABC transporter"
MMARE11_17300	4.39506	2.13588	2.19e-05	conserved alanine rich lipoprotein LppW"
MMARE11_22490	0.187908	-2.4119	2.25e-05	conserved hypothetical transmembrane protein"
MMARE11_42690	0.465027	-1.10461	2.41e-05	EsaT-6 like protein EsxN_1"
MMARE11_32450	6.1024	2.60938	2.42e-05	flavoprotein"
MMARE11_31670	0.148073	-2.75562	2.56e-05	conserved hypothetical MbtH-like protein"
MMARE11_30870	0.378661	-1.40102	2.59e-05	conserved hypothetical protein"
MMARE11_23490	4.42607	2.14603	2.67e-05	integral membrane cytochrome D ubiquinol oxidase
MMARE11_23020	4.47039	2.1604	2.69e-05	conserved hypothetical membrane protein"
MMARE11_05950	2.78805	1.47926	2.8e-05	endopeptidase ATP binding protein (chain B)
MMARE11_03780	0.391227	-1.35392	2.83e-05	MCE-family protein Mce1D"
MMARE11_44980	11.4775	3.52074	2.87e-05	conserved hypothetical protein"
MMARE11_29130	14.7371	3.88138	2.9e-05	heat shock protein transcriptional repressor
MMARE11_37700	0.182682	-2.4526	2.96e-05	conserved hypothetical secreted protein"
MMARE11_08110	0.232493	-2.10474	2.97e-05	metal cation-transporting p-type ATPase F, CtpF"
MMARE11_18910	0.346973	-1.52711	3.24e-05	cell division transmembrane protein FtsK"
MMARE11_15000	5.84806	2.54796	3.25e-05	conserved hypothetical protein"
MMARE11_46150	26.0656	4.70408	3.28e-05	integral membrane protein"
MMARE11_03790	0.37548	-1.41319	3.29e-05	MCE-family lipoprotein LprK (MCE-family
MMARE11_10650	0.346437	-1.52933	3.31e-05	ribosomal protein S9, RpsI"
MMARE11_24440	5.34863	2.41917	3.32e-05	PPE family protein"
MMARE11_31570	2.49125	1.31687	3.43e-05	branched-chain amino acid transaminase IlvE"
MMARE11_39010	0.461869	-1.11445	3.47e-05	ATP synthase B chain AtpF"
MMARE11_49620	0.343852	-1.54014	3.55e-05	cold shock protein A CspA_1"
MMARE11p_00890	105.134	6.71608	3.58e-05	hypothetical protein"
MMARE11_01750	0.530962	-0.91332	3.71e-05	PPE family protein"
MMARE11_14990	11.265	3.49377	3.79e-05	oxidoreductase"
MMARE11_01070	15.9522	3.99568	4.09e-05	conserved hypothetical protein"
MMARE11_25700	0.29527	-1.75989	4.13e-05	conserved hypothetical protein"
MMARE11_19130	5.82507	2.54228	4.55e-05	acyl-CoA dehydrogenase FadE20"
MMARE11_40390	0.263259	-1.92544	4.58e-05	conserved protein"
MMARE11_05020	0.324691	-1.62286	4.6e-05	PPE family protein, PPE4"
MMARE11_00880	6.87728	2.78184	4.62e-05	non-ribosomal peptide synthetase"
MMARE11_36750	0.476518	-1.0694	4.68e-05	ribonuclease E Rne"
MMARE11_40790	18.2214	4.18756	4.71e-05	integral membrane nitrite extrusion protein
MMARE11_07770	0.345352	-1.53386	4.81e-05	conserved hypothetical protein"
MMARE11_21870	3.82133	1.93408	4.82e-05	transcriptional regulatory protein"
MMARE11_25050	0.313516	-1.67339	4.82e-05	conserved secreted protein"
MMARE11_41570	0.230794	-2.11532	4.88e-05	6-phosphogluconate dehydrogenase,
MMARE11_50470	4.30409	2.10571	5.03e-05	conserved hypothetical protein"
MMARE11_44000	3.52692	1.81841	5.15e-05	DNA binding domain, excisionase family"
MMARE11_21240	0.255522	-1.96848	5.25e-05	guanylate kinase Gmk"
MMARE11_02940	0.337347	-1.56769	5.28e-05	serine protease PepA"
MMARE11_13820	0.172439	-2.53584	5.91e-05	NADH dehydrogenase I (chain B) NuoB
MMARE11_52640	2.57859	1.36658	5.94e-05	conserved hypothetical regulatory protein"
MMARE11_11400	0.338645	-1.56215	6.02e-05	Fatty acyl-AMP ligase FadD28_1 and polyketide
MMARE11_03800	0.379793	-1.39671	6.05e-05	MCE-family protein Mce1F"
MMARE11_09460	0.506702	-0.980791	6.2e-05	DNA-directed RNA polymerase, beta subunit, RpoB"
MMARE11_21790	0.0901657	-3.47128	6.31e-05	trehalose-6-phosphate phosphatase OtsB1"
MMARE11_10990	0.342583	-1.54547	6.48e-05	cholesterol oxidase precursor ChoD"
MMARE11_22310	0.308845	-1.69505	6.52e-05	UDP-glucose 6-dehydrogenase, UdgL"
MMARE11_39450	3.22579	1.68965	6.63e-05	carbonic anhydrase"
MMARE11_04980	2.71832	1.44271	6.88e-05	conserved protein"
MMARE11_37200	0.181127	-2.46493	7.05e-05	'tRNA-Arg(tct)'"
MMARE11_22560	0.185326	-2.43186	7.28e-05	nucleotidyltransferase"
MMARE11_28270	3.87356	1.95366	7.43e-05	conserved hypothetical membrane protein"
MMARE11_22710	3.2283	1.69077	7.55e-05	rhamnosyl transferase WbbL2"
MMARE11_04730	10.9835	3.45727	7.59e-05	nitrite reductase [NAD(P)H] large subunit [fad
MMARE11_39200	0.210802	-2.24604	7.86e-05	aldehyde dehydrogenase"
MMARE11_29710	0.167749	-2.57562	8.51e-05	conserved transmembrane transport protein,
MMARE11_01320	4.37725	2.13003	8.65e-05	transcriptional regulator"
MMARE11_34070	0.0759283	-3.71922	9.2e-05	conserved hypothetical protein"
MMARE11_17010	0.35099	-1.5105	9.23e-05	conserved protein"
MMARE11_36920	0.414401	-1.2709	9.61e-05	'tRNA-Gly(tcc)'"
MMARE11_33870	0.0628061	-3.99295	9.72e-05	conserved hypothetical protein"
MMARE11_21210	0.347899	-1.52326	9.84e-05	carbamoyl-phosphate synthase large chain CarB"
MMARE11_10110	0.37683	-1.40801	9.99e-05	50S ribosomal protein L15, RplO"
MMARE11_34050	0.176575	-2.50165	0.00010113	conserved hypothetical protein"
MMARE11_44720	2.56709	1.36013	0.000103213	conserved hypothetical protein"
MMARE11_04790	5.6738	2.50432	0.000103304	aminoglycoside 2'-N-acetyltransferase Aac"
MMARE11_47960	0.220317	-2.18235	0.000104465	MCE-family protein Mce4B"
MMARE11_48210	4.40147	2.13799	0.000104808	conserved hypothetical secreted protein"
MMARE11_48220	4.40147	2.13799	0.000104873	conserved hypothetical membrane protein"
MMARE11_24300	0.310147	-1.68898	0.00010503	conserved hypothetical membrane protein"
MMARE11_16800	0.335827	-1.57421	0.000107372	fatty-acid-CoA ligase FadD22"
MMARE11_10830	1.83123	0.872816	0.000107486	10 kDa chaperone (GroES)"
MMARE11_09920	0.250755	-1.99565	0.00010963	30S ribosomal protein S3, RpsC"
MMARE11_50540	0.233343	-2.09947	0.000111797	recombination protein RecR"
MMARE11_12650	0.257394	-1.95795	0.000112985	two-component sensory transduction
MMARE11_32010	5.06654	2.341	0.000113635	3-methyl-2-oxobutanoate hydroxymethyltransferase
MMARE11_03720	0.40818	-1.29272	0.000114933	fatty-acid-CoA ligase FadD5"
MMARE11_11040	6.85067	2.77624	0.000116672	conserved hypothetical protein"
MMARE11_36640	0.308426	-1.69701	0.000117643	adenylate or guanylate cyclase"
MMARE11_12000	0.133512	-2.90496	0.000118184	arylsulfatase AtsB (aryl-sulfate
MMARE11_03830	0.188433	-2.40788	0.000121351	conserved Mce associated protein"
MMARE11_29990	0.404508	-1.30576	0.000121654	conserved membrane protein"
MMARE11_07350	0.412387	-1.27793	0.000121965	dihydrolipoamide dehydrogenase Lpd"
MMARE11_52370	0.575939	-0.796011	0.000129051	ferredoxin-dependent glutamate synthase [NADPH]
MMARE11_04950	9.12375	3.18963	0.00013001	PPE family protein, PPE3"
MMARE11_16140	14.6903	3.8768	0.000132802	methyltransferase"
MMARE11_53130	0.119233	-3.06814	0.000136324	conserved protein"
MMARE11_15530	0.110743	-3.17472	0.000136766	hypothetical protein"
MMARE11_51880	0.394523	-1.34182	0.000137558	secreted Mpt51/Mpb51 antigen protein FbpD"
MMARE11_26030	17.2426	4.1079	0.000138539	PPE family protein, PPE31"
MMARE11_23180	2.5499	1.35044	0.000140219	histidinol dehydrogenase HisD"
MMARE11_22640	0.304789	-1.71412	0.00014694	conserved transmembrane transport protein, MmpL
MMARE11_16970	2.47067	1.3049	0.000147281	fatty acyl-AMP ligase FadD26"
MMARE11_05490	0.306137	-1.70775	0.000151906	tRNA-Gly"
MMARE11_07090	1.40594	0.491538	0.000156688	60 kDa chaperonin 2 GroEL2"
MMARE11_47920	0.36421	-1.45716	0.000162475	MCE-family protein Mce4F"
MMARE11_24070	0.421946	-1.24487	0.00016273	long-chain acyl-CoA synthase"
MMARE11_18530	0.469741	-1.09006	0.000168368	bifunctional protein polyribonucleotide
MMARE11_13800	0.35806	-1.48173	0.000170217	NADH dehydrogenase I (chain D) NuoD
MMARE11_28500	0.132648	-2.91433	0.000170438	conserved hypothetical secreted protein"
MMARE11_23690	7.05527	2.8187	0.000171701	conserved hypothetical membrane protein"
MMARE11_41640	13.9681	3.80407	0.000173257	conserved hypothetical exported protein"
MMARE11_04270	0.183361	-2.44724	0.000181363	enoyl-CoA hydratase EchA1"
MMARE11_31910	2.94543	1.55848	0.000184174	glutamine synthetase GlnA1"
MMARE11_23560	0.599978	-0.737019	0.000188685	ribosomal protein S1 RpsA"
MMARE11_16940	0.482479	-1.05146	0.000188688	phenolpthiocerol synthesis type-I polyketide
MMARE11_47760	2.38183	1.25207	0.000189627	conserved hypothetical membrane protein CpsA"
MMARE11_26740	2.27807	1.18781	0.00019081	trehalose synthase TreS_1"
MMARE11_03810	0.311008	-1.68498	0.000199977	conserved Mce associated membrane protein"
MMARE11_22330	0.362169	-1.46527	0.000202216	glycosyl transferase"
MMARE11_09220	0.396632	-1.33413	0.000204984	50S ribosomal protein L11, RplK"
MMARE11_09420	2.09805	1.06905	0.000218375	50S ribosomal protein L7/L12, RplL"
MMARE11_25990	0.521311	-0.939783	0.000224259	conserved membrane protein"
MMARE11_30850	0.447004	-1.16164	0.000228211	conserved secreted antigen Wag31"
MMARE11_35540	0.15595	-2.68085	0.000228737	serine acetyltransferase CysE"
MMARE11_31350	1.87387	0.906019	0.000229283	conserved hypothetical secreted protein"
MMARE11_01500	20.3827	4.34927	0.000229484	conserved protein"
MMARE11_43150	0.156726	-2.67369	0.000231239	PPE family protein"
MMARE11_49220	0.67423	-0.568687	0.000236456	ATP-dependent protease ATP-binding subunit
MMARE11_06750	0.373646	-1.42026	0.000241583	lipoprotein aminopeptidase LpqL"
MMARE11_34140	0.0569185	-4.13496	0.000243456	conserved hypothetical protein"
MMARE11_19340	5.0313	2.33093	0.00024394	PE-PGRS family protein"
MMARE11_15940	0.305499	-1.71076	0.00024784	conserved transmembrane transport protein"
MMARE11_10060	0.311037	-1.68484	0.000248734	30S ribosomal protein S8, RpsH"
MMARE11_30740	0.214466	-2.22118	0.000251795	conserved protein MbtH"
MMARE11_35710	0.0473721	-4.39982	0.000252681	PPE family protein"
MMARE11_35720	0.0473721	-4.39982	0.00025687	PPE family protein"
MMARE11_14320	0.128992	-2.95464	0.000258253	conserved hypothetical protein"
MMARE11_04160	2.91867	1.54531	0.000261936	fatty-acid-CoA ligase FadD4"
MMARE11_05160	0.37416	-1.41827	0.000265416	conserved exported protein"
MMARE11_46460	11.752	3.55483	0.000266043	conserved hypothetical transmembrane protein"
MMARE11_24430	6.34553	2.66574	0.000266257	integral membrane drug efflux protein"
MMARE11_15910	0.130734	-2.93529	0.000275343	conserved membrane protein"
MMARE11_36120	0.0905999	-3.46435	0.000276887	conserved hypothetical protein"
MMARE11_48860	17.2131	4.10544	0.000277474	conserved hypothetical membrane protein"
MMARE11_32330	0.440972	-1.18124	0.000281089	conserved protein"
MMARE11_03840	0.250358	-1.99794	0.000288374	conserved Mce associated membrane protein"
MMARE11_10720	2.31388	1.21032	0.000291121	glucosamine-fructose-6-phosphate
MMARE11_22770	0.336244	-1.57242	0.000295073	conserved polyketide synthase associated protein
MMARE11_03990	2.81161	1.4914	0.000303258	conserved secretory protein"
MMARE11_00130	4.91985	2.29861	0.00030369	conserved hypothetical membrane protein"
MMARE11_42770	0.413223	-1.27501	0.000311117	enolase Eno"
MMARE11_24570	0.23624	-2.08167	0.000320414	'tRNA-Pro(ggg)'"
MMARE11_16680	0.413496	-1.27405	0.000322625	pyruvate carboxylase Pca"
MMARE11_42210	6.04189	2.595	0.000328724	conserved hypothetical protein"
MMARE11_38010	0.287127	-1.80024	0.000328796	conserved hypothetical alanine-rich protein"
MMARE11_32220	11.1823	3.48314	0.00032943	hypothetical protein"
MMARE11_28950	0.0949601	-3.39653	0.000335175	PE-PGRS family protein"
MMARE11_21900	2.18196	1.12563	0.000342843	conserved ATP-binding protein ABC transporter"
MMARE11_16820	0.305727	-1.70968	0.000343399	conserved lipoprotein LppX"
MMARE11_36680	6.35561	2.66803	0.000354216	cytochrome P450 268A2 Cyp268A2"
MMARE11_40650	6.36585	2.67035	0.000357407	proline dehydrogenase, PutA"
MMARE11_27550	2.82197	1.4967	0.000357493	acyl-CoA ligase FadD31"
MMARE11_36760	0.360819	-1.47065	0.000357937	nucleoside diphosphate kinase NdkA"
MMARE11_21630	0.385291	-1.37598	0.000359846	triosephosphate isomerase Tpi"
MMARE11_34680	0.174362	-2.51984	0.000365739	conserved hypothetical membrane protein"
MMARE11_44320	5.85227	2.549	0.000367907	conserved hypothetical protein"
MMARE11_35190	14.7739	3.88498	0.000370394	conserved hypothetical protein"
MMARE11_28130	4.82771	2.27134	0.000372449	hypothetical protein"
MMARE11_22270	0.257459	-1.95759	0.000372712	conserved hypothetical esterase LipL"
MMARE11_30880	0.302536	-1.72482	0.00038141	conserved protein"
MMARE11_16930	0.385264	-1.37608	0.000393311	phenolpthiocerol synthesis type-I polyketide
MMARE11_22110	0.28034	-1.83475	0.000395335	3-oxoacyl-[acyl-carrier protein] reductase,
MMARE11_35480	4.15625	2.05528	0.000401476	adenylate cyclase"
MMARE11_16470	0.421261	-1.24722	0.000409955	DNA-binding protein Hu, HupB"
MMARE11_50880	0.37341	-1.42117	0.000411574	conserved hypothetical protein"
MMARE11_16060	0.312157	-1.67966	0.000418324	electron transfer flavoprotein (alpha-subunit)
MMARE11_01490	28.8206	4.84903	0.000433979	conserved hypothetical transmembrane protein"
MMARE11_38960	0.448879	-1.1556	0.000435715	ATP synthase epsilon chain AtpC"
MMARE11_47930	0.340102	-1.55596	0.000437294	MCE-family lipoprotein LprN"
MMARE11_00100	0.144646	-2.7894	0.000439293	conserved hypothetical protein"
MMARE11_23140	0.28446	-1.8137	0.00044058	quinolinate synthetase NadA"
MMARE11_24960	0.0898031	-3.47709	0.000440892	conserved hypothetical protein"
MMARE11_43440	2.48971	1.31598	0.000441035	50S ribosomal protein L32 RpmF"
MMARE11_09760	0.361961	-1.46609	0.000441798	Creatinine amidohydrolase"
MMARE11_51850	0.570461	-0.8098	0.000447439	polyketide synthase Pks13"
MMARE11_37130	0.488813	-1.03265	0.000460185	ATP-binding component of an ABC transporter"
MMARE11_18230	0.331653	-1.59225	0.000461323	ribosome-binding factor a RbfA"
MMARE11_05850	2.58964	1.37275	0.000462131	L-asparagine permease AnsP1_1"
MMARE11_51480	0.234204	-2.09416	0.000469269	enoyl-CoA hydratase, EchA21"
MMARE11_35270	4.43708	2.14961	0.000475748	conserved hypothetical protein"
MMARE11_21680	5.43763	2.44298	0.000480141	protein-export membrane protein (translocase
MMARE11_43030	0.33826	-1.5638	0.000493428	conserved hypothetical membrane protein"
MMARE11_31820	0.146323	-2.77278	0.000493692	conserved hypothetical protein"
MMARE11_43380	8.04655	3.00837	0.000494431	conserved hypothetical membrane protein"
MMARE11_22660	0.425097	-1.23414	0.000494955	polyketide synthase, Pks5_1"
MMARE11_51380	0.140831	-2.82796	0.000508827	conserved hypothetical protein"
MMARE11_31560	2.7445	1.45654	0.000510889	conserved hypothetical integral membrane
MMARE11_25140	21.9084	4.45341	0.000515794	hypothetical membrane protein"
MMARE11_50480	2.4475	1.29131	0.000530314	2-isopropylmalate synthase LeuA"
MMARE11_13550	0.218383	-2.19507	0.000532674	non-heme haloperoxidase Hpx"
MMARE11_43680	4.22814	2.08002	0.000535519	conserved hypothetical protein"
MMARE11_52700	2.53199	1.34027	0.000558147	conserved membrane protein"
MMARE11_01370	5.25684	2.39419	0.000560809	transcriptional regulatory protein (probably
MMARE11_10950	2.25485	1.17303	0.000567415	conserved hypothetical protein"
MMARE11_10510	27.5191	4.78236	0.000574788	PPE family protein"
MMARE11_07940	0.406535	-1.29855	0.00058047	uroporphyrin-III C-methyltransferase HemD"
MMARE11_31830	0.319105	-1.64789	0.000580961	acetolactate synthase (large subunit) IlvB1_2"
MMARE11p_00050	3.86211	1.94939	0.000582248	'Fic/DOC family protein'"
MMARE11_14620	0.0821616	-3.60539	0.000589078	conserved hypothetical protein"
MMARE11_23150	0.291053	-1.78065	0.000593227	l-aspartate oxidase NadB"
MMARE11_22630	0.442778	-1.17535	0.000610109	fatty acyl-AMP ligase FadD25"
MMARE11_10560	3.7135	1.89278	0.000610764	cutinase precursor, Cut3"
MMARE11_32050	0.116119	-3.10632	0.000614243	ribonuclease P RNA"
MMARE11_12110	6.55136	2.71179	0.000614824	L-lysine-epsilon aminotransferase Lat"
MMARE11_10870	0.213061	-2.23066	0.000615655	PPE family protein"
MMARE11_40130	9.10844	3.1872	0.00061725	GabA permease GabP_1"
MMARE11_25960	0.448624	-1.15642	0.000617327	conserved protein"
MMARE11_20180	0.0863522	-3.53362	0.000627675	conserved transmembrane alanine and leucine rich
MMARE11_01730	1.81699	0.861554	0.000628544	conserved hypothetical membrane protein"
MMARE11_22570	0.286067	-1.80557	0.000629289	predicted pyridoxal phosphate-dependent enzyme"
MMARE11_37570	2.05212	1.03711	0.000637823	tRNA-Lys"
MMARE11_06760	0.255584	-1.96813	0.000641317	lipoprotein aminopeptidase LpqL_1"
MMARE11_20620	0.401067	-1.31809	0.000644288	protein-export membrane protein SecF"
MMARE11_19210	3.89497	1.96161	0.00064659	conserved hypothetical hydrolase"
MMARE11_13760	0.300224	-1.73589	0.000657696	NADH dehydrogenase I (chain H) NuoH
MMARE11_47630	0.292927	-1.77139	0.000661562	PE-PGRS family protein"
MMARE11_19740	5.52805	2.46677	0.000662109	conserved secreted protein"
MMARE11_13500	0.0691853	-3.85339	0.000694021	hypothetical protein"
MMARE11_36170	0.459733	-1.12113	0.000698489	ferredoxin-dependent nitrite reductase, NirA_2"
MMARE11_21350	3.06655	1.61662	0.000698689	transcriptional regulatory protein"
MMARE11_31660	0.204148	-2.29231	0.000704253	conserved transmembrane transport protein-MmpL
MMARE11_06950	0.364641	-1.45545	0.000704514	conserved hypothetical protein"
MMARE11_47330	0.293727	-1.76745	0.0007095	serine/threonine-protein kinase PknF_2"
MMARE11_32020	3.72278	1.89638	0.000712711	conserved hypothetical membrane protein"
MMARE11_26070	7.28323	2.86458	0.000713912	Mg2+ transport p-type ATPase C MgtC"
MMARE11_15690	2.70259	1.43434	0.000736255	conserved protein"
MMARE11_45670	12.1074	3.59781	0.000741634	transcriptional regulatory protein (possibly
MMARE11_28140	2.21843	1.14954	0.000756782	PE family protein"
MMARE11_05620	14.5123	3.85921	0.000757396	UDP-glucose dehydrogenase UdgA"
MMARE11_09770	0.437243	-1.19349	0.000775333	membrane glycosyl transferase"
MMARE11_10100	0.19229	-2.37865	0.000781974	50S ribosomal protein L30, RpmD"
MMARE11_51410	10.1664	3.34573	0.000784757	PE-PGRS family protein"
MMARE11_00740	0.416875	-1.26231	0.000788142	50S ribosomal protein L9 RplI"
MMARE11_36060	4.38555	2.13276	0.00079337	acetyl hydrolase MbtJ"
MMARE11_31700	0.396039	-1.33629	0.000796473	non-ribosomal peptide synthetase"
MMARE11_34670	0.198964	-2.32942	0.000809903	conserved proline, glycine, valine-rich secreted
MMARE11_22320	0.432143	-1.21042	0.000831725	UDP-glucose 4-epimerase, GalE5"
MMARE11_42010	2.7258	1.44668	0.000837305	hemolysin-like protein"
MMARE11_26990	2.41539	1.27226	0.000844855	conserved hypothetical protein"
MMARE11_52630	3.93853	1.97766	0.00084779	conserved hypothetical protein"
MMARE11_16630	3.21918	1.68669	0.000858921	oxidoreductase"
MMARE11_52690	1.7095	0.773574	0.000870904	conserved hypothetical membrane protein"
MMARE11_42680	0.641912	-0.639553	0.000872023	EsaT-6 like protein EsxP"
MMARE11_33450	6.39708	2.67741	0.000882984	transcriptional regulatory protein (probably
MMARE11_30230	2.07317	1.05184	0.000891214	dihydrolipoamide dehydrogenase Lpd_1"
MMARE11_33140	0.065128	-3.94058	0.000897456	NADH-dependent glutamate synthase (small
MMARE11_24220	4.69827	2.23213	0.000902648	putative domain protein"
MMARE11_13840	0.419914	-1.25183	0.000930315	PPE family protein"
MMARE11_46130	2.56271	1.35767	0.000937185	sensory histidine kinase UhpB"
MMARE11_41200	1.78651	0.837147	0.000941293	conserved hypothetical protein"
MMARE11_30390	4.85225	2.27865	0.00094806	conserved hypothetical protein"
MMARE11_51350	0.33603	-1.57334	0.00098215	two-component sensor kinase TcrY"
MMARE11_16920	0.565626	-0.822079	0.000982423	phenolpthiocerol synthesis type-I polyketide
MMARE11_04200	0.150805	-2.72925	0.000985371	conserved protein"
MMARE11_37350	0.217286	-2.20233	0.000988455	acetyl-/propionyl-CoA carboxylase (beta subunit)
MMARE11_49410	0.103052	-3.27856	0.000989895	EsaT-6 like protein EsxN_2"
MMARE11_30610	8.45942	3.08056	0.000996516	hypothetical protein"
MMARE11_48660	5.10865	2.35294	0.000998946	acyl-CoA dehydrogenase FadE31"
MMARE11_22090	0.390102	-1.35808	0.0010002	conserved protein"
MMARE11_09950	0.473717	-1.0779	0.0010212	30S ribosomal protein S17, RpsQ"
MMARE11_07420	2.66806	1.41579	0.00102477	isocitrate lyase Icl"
MMARE11_26340	0.552773	-0.855241	0.00103534	malate synthase G GlcB"
MMARE11_40640	6.11296	2.61187	0.0010389	transcriptional regulator"
MMARE11_22580	0.17985	-2.47514	0.00104448	UDP-glucose 4-epimerase, GalE6"
MMARE11_25910	3.30834	1.72611	0.00105514	PPE family protein, PPE26"
MMARE11_21690	3.31378	1.72848	0.00106558	phosphoenolpyruvate carboxylase, Ppc"
MMARE11_48650	8.9731	3.16561	0.00109109	fatty-acid-CoA ligase FadD3"
MMARE11_30930	0.302017	-1.7273	0.00109477	UDP-N-acetylglucosamine-N-acetylmuramyl-(pentapeptide)
MMARE11_13710	0.36195	-1.46614	0.00109771	NADH dehydrogenase I (chain M) NuoM
MMARE11_44700	0.365737	-1.45112	0.00110592	conserved protein"
MMARE11_06050	0.219452	-2.18802	0.00110601	carbon monoxyde dehydrogenase (medium chain),
MMARE11_42100	0.385921	-1.37362	0.00111853	cystathionine beta-synthase Cbs"
MMARE11_09210	0.57432	-0.800074	0.00113552	transcription antitermination protein, NusG"
MMARE11_00090	0.140008	-2.83641	0.00116092	transcriptional regulator"
MMARE11_09850	0.368029	-1.44211	0.00117161	30S ribosomal protein S10, RpsJ"
MMARE11_29020	5.28031	2.40062	0.00118243	conserved hypothetical protein"
MMARE11_07500	2.7808	1.4755	0.00118329	conserved transmembrane protein"
MMARE11_10640	0.567151	-0.818195	0.00123231	50S ribosomal protein L13, RplM"
MMARE11_28350	0.556417	-0.845763	0.00123293	catalase-peroxidase-peroxynitritase T KatG"
MMARE11_15640	0.337724	-1.56608	0.00124331	transcriptional regulatory protein (probably
MMARE11_37320	0.137028	-2.86745	0.0012589	conserved protein"
MMARE11_30920	0.375344	-1.41372	0.00126347	UDP-N-acetylmuramate-alanine ligase MurC"
MMARE11_19220	3.00984	1.58969	0.00126936	conserved protein"
MMARE11_13690	0.259275	-1.94745	0.00127506	PPE family protein"
MMARE11_29510	2.00973	1.007	0.0012858	polyprenol-monophosphomannose synthase, Ppm1B"
MMARE11_34200	0.374666	-1.41632	0.00128792	Geranylgeranyl pyrophosphate synthase"
MMARE11_08650	0.394053	-1.34354	0.00129151	glycerol-3-phosphate dehydrogenase, GpdA1"
MMARE11_51710	2.6835	1.42412	0.00129453	conserved hypothetical protein"
MMARE11_31480	2.15382	1.1069	0.00131253	carbohydrate kinase CbhK"
MMARE11_44350	0.182874	-2.45108	0.001315	PE family protein"
MMARE11_05010	0.397094	-1.33245	0.00131795	PE family protein, PE5"
MMARE11_04360	0.32289	-1.63089	0.00135814	glycosyltransferase"
MMARE11_27000	5.27205	2.39836	0.00137809	conserved hypothetical membrane protein"
MMARE11_52360	0.45088	-1.14918	0.00138513	NADH-dependent glutamate synthase (small
MMARE11_39360	3.42377	1.77559	0.00139747	conserved hypothetical transport protein"
MMARE11_37830	3.86205	1.94937	0.00140398	cytochrome P450 138A4 Cyp138A4"
MMARE11_50920	0.465803	-1.10221	0.00141198	long-chain-fatty-acid-CoA ligase FadD15_1"
MMARE11_49030	0.494698	-1.01538	0.00142232	carbonic anhydrase"
MMARE11_12610	1.60808	0.685343	0.00142829	adenosylhomocysteinase SahH"
MMARE11_36850	0.538452	-0.89311	0.00143115	pyruvate:ferredoxin oxidoreductase PorB, beta
MMARE11_18700	4.54587	2.18456	0.00143826	PPE family protein, PPE44"
MMARE11_09870	0.412325	-1.27814	0.0014384	50S ribosomal protein L4, RplD"
MMARE11_50440	2.80781	1.48944	0.00144162	aspartate-semialdehyde dehydrogenase Asd"
MMARE11_50430	4.38246	2.13174	0.00144267	conserved hypothetical secreted protein"
MMARE11_32940	0.171938	-2.54004	0.00144508	conserved hypothetical membrane protein"
MMARE11_16080	51.8139	5.69527	0.00144602	conserved hypothetical membrane protein"
MMARE11_04750	3.50853	1.81087	0.00144706	conserved hypothetical protein"
MMARE11_28250	3.56687	1.83466	0.00145381	conserved hypothetical O-methyltransferase"
MMARE11_31070	2.86175	1.5169	0.00147603	conserved protein"
MMARE11_47260	0.384416	-1.37926	0.00147634	adenylosuccinate lyase, PurB"
MMARE11_48250	3.18764	1.67249	0.00148024	conserved hypothetical oxidoreductase"
MMARE11_11390	0.214647	-2.21996	0.00153011	oxidoreductase"
MMARE11_48260	6.74928	2.75473	0.00154522	conserved hypothetical protein"
MMARE11_31340	2.78393	1.47712	0.00157089	conserved hypothetical secreted protein"
MMARE11_35350	2.72348	1.44545	0.00158506	conserved transmembrane ATP-binding protein ABC
MMARE11_31650	0.297969	-1.74677	0.00159026	ATP-binding protein ABC transporter"
MMARE11_49950	1.90477	0.929614	0.00162234	bifunctional membrane-associated
MMARE11_20270	0.198278	-2.3344	0.00162766	conserved hypothetical protein"
MMARE11_49420	0.0829978	-3.59078	0.00163554	EsaT-6 like protein EsxP_1"
MMARE11_01290	3.13432	1.64815	0.00163684	lipid-transfer protein Ltp1_1"
MMARE11_18200	0.446401	-1.16359	0.00164533	N utilization substance protein a NusA"
MMARE11_42110	0.275366	-1.86058	0.0016566	lipase LipU"
MMARE11_24360	3.88451	1.95773	0.00166192	myo-inositol-1-phosphate synthase"
MMARE11_18430	2.84795	1.50992	0.0016854	conserved hypothetical protein"
MMARE11_52730	2.65323	1.40775	0.00168851	PE family protein"
MMARE11_48110	3.71244	1.89237	0.00169572	fatty-acid-CoA ligase FadD19_1"
MMARE11_13830	0.32402	-1.62584	0.00173102	NADH dehydrogenase I (chain a) NuoA
MMARE11_36880	1.41663	0.502459	0.00173397	ATP-dependent CLP protease ATP-binding subunit
MMARE11_04740	10.5582	3.40029	0.00173828	nitrite reductase [NAD(P)H] small subunit NirD"
MMARE11_11250	0.604626	-0.725885	0.00175218	conserved hypothetical regultory protein"
MMARE11_25100	0.224976	-2.15216	0.00176382	PPE family protein, PPE8"
MMARE11_19350	1.66142	0.732417	0.00177363	RNA polymerase sigma factor SigA"
MMARE11_17750	9.0306	3.17482	0.00178435	PPE family protein"
MMARE11_21800	2.95849	1.56486	0.00178846	transcriptional activator protein"
MMARE11_23200	3.14219	1.65177	0.00178965	imidazole glycerol-phosphate dehydratase HisB"
MMARE11_26550	2.52803	1.33801	0.00180221	conserved hypothetical protein"
MMARE11_22880	0.234237	-2.09396	0.00183	fatty acyl-CoA reductase"
MMARE11_32600	3.9091	1.96684	0.00186843	conserved transmembrane protein, MmpS5_2"
MMARE11_23970	1.81058	0.856449	0.00187036	chalcone synthase, Pks11_1"
MMARE11_15410	3.88632	1.95841	0.00187809	conserved hypothetical protein"
MMARE11_08530	8.64229	3.11141	0.00187952	mannosyltransferase, PimB"
MMARE11_06850	0.469178	-1.09179	0.00189241	thiamine biosynthesis protein ThiC"
MMARE11_01410	0.412987	-1.27583	0.00189742	coenzyme F420-dependent oxidoreductase"
MMARE11_23030	0.400104	-1.32155	0.00192312	inv protein"
MMARE11_10480	0.469012	-1.0923	0.00194579	50S ribosomal protein L17, RplQ"
MMARE11_41330	0.0492878	-4.34263	0.0019464	hypothetical protein"
MMARE11_47030	7.0517	2.81797	0.00194796	hypothetical protein"
MMARE11_37120	0.628543	-0.669916	0.00195194	NAD-dependent glutamate dehydrogenase Gdh"
MMARE11_52720	0.506888	-0.980261	0.00198008	conserved hypothetical protein"
MMARE11_38940	4.38572	2.13281	0.00198657	cobalamin adenosyltransferase"
MMARE11_52020	2.22168	1.15165	0.00201023	conserved hypothetical protein"
MMARE11_39550	0.401008	-1.3183	0.0020154	lipoprotein LprC"
MMARE11_07310	0.158946	-2.65339	0.00202614	conserved hypothetical protein"
MMARE11_41620	3.26123	1.70542	0.00203217	conserved protein"
MMARE11_52180	3.70383	1.88902	0.0020509	superoxide dismutase [fe] SodA"
MMARE11_36180	0.197755	-2.33822	0.00206666	3'-phosphoadenosine 5'-phosphosulfate reductase
MMARE11_24230	0.147769	-2.75858	0.00207328	lipoprotein, LprJ"
MMARE11_37010	0.53337	-0.906792	0.00207998	conserved protein"
MMARE11_17970	2.2645	1.1792	0.00208016	nickel/iron-hydrogenase I large subunit, HyaB"
MMARE11_46510	0.273952	-1.868	0.00208876	conserved hypothetical protein"
MMARE11_13750	0.287207	-1.79984	0.00209753	NADH dehydrogenase I (chain I) NuoI
MMARE11_18500	2.16914	1.11712	0.00212101	30S ribosomal protein S15 RpsO"
MMARE11p_00880	10.9284	3.45001	0.0021515	hypothetical protein"
MMARE11_03300	0.414395	-1.27092	0.00215748	short-chain type dehydrogenase/reductase"
MMARE11_10900	2.5694	1.36143	0.00216968	metal-dependent hydrolase"
MMARE11_53100	0.347734	-1.52394	0.00219015	chromosome partitioning protein ParB"
MMARE11_20110	0.227689	-2.13486	0.00219674	conserved hypothetical protein"
MMARE11_30840	0.45681	-1.13033	0.00221991	conserved hypothetical membrane protein"
MMARE11_49830	0.422563	-1.24276	0.00222817	membrane-associated serine protease"
MMARE11_27330	20.7312	4.37373	0.00224657	transcriptional regulatory protein
MMARE11_29390	0.0717815	-3.80024	0.00226575	conserved hypothetical membrane protein"
MMARE11_44990	2.61124	1.38474	0.00226803	conserved protein"
MMARE11_51940	2.65578	1.40913	0.0022755	UDP-galactopyranose mutase Glf"
MMARE11_43430	2.61588	1.3873	0.00229118	mycobacterial persistence regulator MprA"
MMARE11_16870	0.617644	-0.695152	0.00231806	multifunctional mycocerosic acid synthase
MMARE11_46340	0.113109	-3.14421	0.00231887	hypothetical membrane protein"
MMARE11_26750	1.51453	0.598869	0.00234239	alkyl hydroperoxide reductase D protein AhpD"
MMARE11_47990	0.354113	-1.49772	0.00237698	conserved membrane protein YrbE4A"
MMARE11_25850	0.580063	-0.785719	0.00240964	conserved FtsK/SpoIIIE family protein"
MMARE11_46770	0.183055	-2.44965	0.00242033	sulphur metabolism protein, SseC2"
MMARE11_04690	2.35212	1.23396	0.00243151	succinate dehydrogenase (membrane anchor
MMARE11_26920	0.249172	-2.00479	0.0024488	conserved hypothetical protein"
MMARE11_25790	4.14778	2.05234	0.00245464	conserved hypothetical protein"
MMARE11_49490	0.440883	-1.18153	0.00245597	D-alanyl-D-alanine carboxypeptidase DacB1"
MMARE11_47310	0.362126	-1.46544	0.00247578	molybdopterin biosynthesis protein, MoeY"
MMARE11_21990	2.95837	1.5648	0.00248666	thioredoxin TrxB1"
MMARE11_37370	0.304942	-1.71339	0.00248972	succinyl-CoA:3-ketoacid-coenzyme A transferase
MMARE11_30600	7.03181	2.8139	0.00249132	hypothetical protein"
MMARE11_05040	0.507361	-0.978915	0.00252633	EsaT-6 like protein EsxH"
MMARE11_32460	3.59128	1.8445	0.00252675	conserved hypothetical protein"
MMARE11_13790	0.230275	-2.11857	0.00253493	NADH dehydrogenase I (chain E) NuoE
MMARE11_14650	3.86817	1.95165	0.00253697	conserved hypothetical secreted protein"
MMARE11_30010	2.14802	1.103	0.00253703	sec-independent protein translocase
MMARE11_30070	0.528633	-0.919663	0.00253962	proteasome (beta subunit) PrcB"
MMARE11_18220	0.489621	-1.03026	0.00254427	translation initiation factor IF-2 InfB"
MMARE11_20930	0.216407	-2.20818	0.00256241	conserved hypothetical protein"
MMARE11_04990	2.18815	1.12971	0.00256362	conserved membrane protein"
MMARE11_09940	0.421728	-1.24562	0.00259282	50S ribosomal protein L29, RpmC"
MMARE11_31640	0.284844	-1.81176	0.00261788	integral membrane protein ABC transporter"
MMARE11_39090	1.8766	0.908118	0.00261815	50S ribosomal protein L31 RpmE"
MMARE11_02000	0.339906	-1.55679	0.00262682	glutamine-transport ATP-binding protein ABC
MMARE11_28810	6.80459	2.76651	0.00263854	hypothetical protein"
MMARE11_04770	9.41432	3.23486	0.00263899	transcriptional regulatory protein"
MMARE11_03050	5.56551	2.47651	0.00264396	flavodoxin oxidoreductase"
MMARE11_07260	5.40295	2.43375	0.00266381	conserved hypothetical protein"
MMARE11_41340	0.15935	-2.64973	0.00266614	PPE family protein"
MMARE11_25390	0.294556	-1.76339	0.00266629	putative signal-transduction protein containing
MMARE11_30080	0.474668	-1.07501	0.00267228	conserved protein"
MMARE11_48270	5.93242	2.56862	0.00270507	conserved hypothetical protein"
MMARE11_00870	4.6328	2.21189	0.00271775	polyketide synthase"
MMARE11_10930	0.454016	-1.13918	0.00271926	alternative RNA polymerase sigma-D factor, SigD"
MMARE11_37360	0.182334	-2.45535	0.00274203	succinyl-CoA:3-ketoacid-coenzyme A transferase
MMARE11_19670	2.50837	1.32675	0.00275461	conserved transmembrane protein"
MMARE11_23510	2.52836	1.3382	0.00276351	'tRNA-Leu(caa)'"
MMARE11_51720	4.04532	2.01625	0.00278269	conserved hypothetical membrane protein"
MMARE11_22590	0.155022	-2.68945	0.00278916	conserved hypothetical membrane protein"
MMARE11_22510	0.320173	-1.64308	0.00281614	3-dehydroquinate synthase AroB_2"
MMARE11_23390	0.546924	-0.870587	0.00281821	prolipoprotein diacylglyceryl transferases Lgt"
MMARE11_15550	3.21618	1.68535	0.00282633	cytochrome P450 136A2 Cyp136A2"
MMARE11_39800	2.44106	1.28751	0.00283324	conserved transmembrane ATP-binding protein ABC
MMARE11_41920	0.483862	-1.04733	0.00284226	PhoH-like protein PhoH2"
MMARE11_40120	3.73445	1.90089	0.00286429	F420-dependent glucose-6-phosphate dehydrogenase
MMARE11_28710	6.83686	2.77333	0.00288823	hypothetical protein"
MMARE11_21610	0.456054	-1.13272	0.00289322	glyceraldehyde 3-phosphate dehydrogenase Gap"
MMARE11_19280	3.18959	1.67337	0.00289691	conserved hypothetical membrane protein"
MMARE11_18560	2.6357	1.39819	0.00291973	secreted L-alanine dehydrogenase Ald (40 kDa
MMARE11_48450	4.15143	2.05361	0.0029227	conserved hypothetical protein"
MMARE11_20150	0.531869	-0.910857	0.00292873	conserved hypothetical protein"
MMARE11_46660	1.896	0.92296	0.00295574	conserved hypothetical protein"
MMARE11_35640	0.212772	-2.23262	0.00296577	membrane-associated phospholipase C 2 PlcB_5"
MMARE11_51730	2.22216	1.15196	0.00296848	oxidoreductase"
MMARE11_52680	1.76271	0.817796	0.00297523	conserved hypothetical protein"
MMARE11_07210	2.06231	1.04426	0.00301441	conserved transmembrane transport protein
MMARE11_30620	5.49841	2.45901	0.00301541	hypothetical protein"
MMARE11_30940	0.558388	-0.840661	0.00304852	FtsW-like protein FtsW"
MMARE11_52750	0.642545	-0.63813	0.00304996	Esat-6 like protein EsxB"
MMARE11_49190	2.32797	1.21907	0.00307664	conserved membrane protein"
MMARE11_26970	5.92958	2.56793	0.00308319	conserved hypothetical protein"
MMARE11_47980	0.3741	-1.4185	0.00308551	conserved hypothetical membrane protein YrbE4B"
MMARE11_36870	1.96806	0.976772	0.00311456	conserved integral membrane transport protein"
MMARE11_19950	14.0354	3.81099	0.00312277	tRNA-Val"
MMARE11_21590	0.400148	-1.32139	0.00318361	dehydrogenase"
MMARE11_35220	0.403522	-1.30928	0.00324858	conserved membrane protein"
MMARE11_37150	0.192553	-2.37667	0.00333776	hypothetical protein"
MMARE11_24250	0.283373	-1.81922	0.00333907	phosphatase"
MMARE11_45800	3.50092	1.80774	0.00335983	transcriptional regulatory protein"
MMARE11_17190	0.414303	-1.27124	0.00336818	signal recognition particle protein Ffh"
MMARE11_49610	0.262868	-1.92759	0.00338865	conserved hypothetical protein"
MMARE11_37310	0.142099	-2.81503	0.00341211	citrate (pro-3s)-lyase (beta subunit) CitE"
MMARE11_18850	4.81055	2.2662	0.00344009	thymidylate synthase ThyX"
MMARE11_24310	0.265743	-1.91189	0.00344258	conserved hypothetical protein"
MMARE11_15920	0.426978	-1.22777	0.00344336	DNA photolyase, PhrI"
MMARE11_10660	0.528532	-0.919938	0.00344649	phosphomannomutase, MrsA"
MMARE11_32610	2.50849	1.32682	0.00346699	cytochrome P450 124A1, Cyp124A1"
MMARE11_10200	3.4608	1.79111	0.00350206	transcriptional regulatory protein"
MMARE11_23710	0.455395	-1.13481	0.00352038	initiation factor IF-3 InfC"
MMARE11_04870	0.565106	-0.823408	0.00357905	acyl-CoA dehydrogenase FadE6"
MMARE11_35860	2.09298	1.06556	0.00359242	PhoH-like protein PhoH1"
MMARE11_46980	3.3148	1.72892	0.00359375	conserved hypothetical protein"
MMARE11_05030	0.511404	-0.967466	0.00360392	EsaT-6 like protein EsxG"
MMARE11_08890	4.621	2.2082	0.00361595	oxidoreductase"
MMARE11_02820	0.455774	-1.13361	0.00362129	transmembrane acyltransferase"
MMARE11_50570	0.474834	-1.07451	0.00362182	conserved protein"
MMARE11_15930	0.334241	-1.58104	0.00362984	tryptophan-rich sensory protein"
MMARE11_19590	0.417363	-1.26062	0.00366927	conserved hypothetical protein"
MMARE11_22740	0.150125	-2.73576	0.00379229	conserved hypothetical transmembrane protein"
MMARE11_19150	0.508066	-0.976912	0.00383417	conserved transmembrane alanine and glycine rich
MMARE11_30950	0.334336	-1.58063	0.00385912	UDP-N-acetylmuramoylalanine-D-glutamate ligase
MMARE11_16750	0.611376	-0.709869	0.00391184	conserved hypothetical protein"
MMARE11_30020	2.16147	1.11201	0.00391664	sec-independent protein translocase
MMARE11_40940	0.509658	-0.972397	0.00393719	F420 biosynthesis protein FbiC"
MMARE11_49980	3.67386	1.8773	0.00401925	conserved hypothetical protein"
MMARE11_31500	2.0198	1.01421	0.00402952	conserved protein"
MMARE11_46410	0.405032	-1.30389	0.00405073	marR-family transcriptional regulator"
MMARE11_36200	0.390448	-1.3568	0.00405744	gamma-glutamyltranspeptidase precursor GgtB"
MMARE11_13730	0.220324	-2.1823	0.00406667	NADH dehydrogenase I (chain K) NuoK
MMARE11_26330	0.509027	-0.974186	0.00410234	conserved membrane protein"
MMARE11_05530	1.98648	0.990211	0.00411264	'tRNA-Gly(ccc)'"
MMARE11_53080	2.60766	1.38276	0.00413755	hydrolase"
MMARE11_17530	0.492187	-1.02272	0.00414507	uridylate kinase PyrH"
MMARE11_19710	4.58758	2.19773	0.00415918	conserved hypothetical protein"
MMARE11_37340	0.200781	-2.31631	0.00418907	acetyl-/propionyl-coenzyme A carboxylase alpha
MMARE11_28280	3.20644	1.68097	0.00425081	hypothetical protein"
MMARE11_51020	4.98802	2.31847	0.00430518	conserved hypothetical protein"
MMARE11_15730	0.536017	-0.89965	0.00431112	phosphoserine phosphatase SerB2"
MMARE11_50340	0.29749	-1.74909	0.00433367	selenocysteine lyase, CsdB"
MMARE11_21730	0.405375	-1.30267	0.00433611	OXPP cycle protein OpcA"
MMARE11_43060	2.95106	1.56123	0.00433918	arginine deiminase ArcA"
MMARE11_26240	0.513554	-0.961412	0.00434832	glycine cleavage system H protein GcvH"
MMARE11_47120	4.06324	2.02263	0.00434931	conserved hypothetical regulatory protein"
MMARE11_20370	0.557085	-0.844031	0.00435246	pyridoxine biosynthesis protein, SnzP"
MMARE11_12520	0.370832	-1.43116	0.0043757	conserved hypothetical protein"
MMARE11_19200	2.65379	1.40806	0.00439784	conserved hypothetical protein"
MMARE11_01300	4.69962	2.23254	0.00442581	conserved hypothetical protein"
MMARE11_36670	3.92457	1.97253	0.00443648	Sir2-like regulatory protein"
MMARE11_10240	0.590627	-0.759681	0.00445177	conserved protein"
MMARE11_11380	0.296304	-1.75485	0.00446485	conserved secreted protein"
MMARE11_06770	0.423556	-1.23937	0.00447248	lipoprotein peptidase LpqM"
MMARE11_29060	9.42734	3.23685	0.00448972	IS2 transposase TnpB"
MMARE11_25780	4.73911	2.24461	0.00450512	isochorismatase family protein"
MMARE11_50010	18.8725	4.23822	0.00450695	conserved hypothetical membrane protein"
MMARE11_31470	1.90878	0.932653	0.00451251	asparagine synthetase AsnB"
MMARE11_26960	9.68465	3.2757	0.0045505	oxidoreductase"
MMARE11_50870	0.286319	-1.8043	0.00457277	conserved hypothetical protein"
MMARE11_47220	2.86146	1.51675	0.00461991	aldehyde dehydrogenase"
MMARE11_19630	0.297067	-1.75114	0.00467453	protoporphyrinogen oxidase HemY"
MMARE11_40680	6.49445	2.69921	0.0046895	conserved hypothetical protein"
MMARE11_51950	0.564328	-0.825395	0.00471214	exported repetitive protein precursor Erp"
MMARE11_03310	0.182814	-2.45155	0.00473142	quinone oxidoreductase"
MMARE11_42350	0.611153	-0.710395	0.00474234	arylsulfatase, AslA"
MMARE11_01390	1.84416	0.882962	0.00477268	conserved protein"
MMARE11_44590	2.37877	1.25022	0.0047933	two-component sensor histidine kinase PrrB"
MMARE11_04180	3.37972	1.7569	0.00479391	conserved hypothetical membrane protein"
MMARE11_26190	0.528558	-0.919865	0.00479761	preprotein translocase ATPase SecA2"
MMARE11_48020	3.01771	1.59345	0.00480914	acyl-CoA dehydrogenase FadE26"
MMARE11_36630	0.421372	-1.24684	0.0048222	conserved hypothetical membrane protein"
MMARE11_19780	4.93192	2.30215	0.00482432	site-specific tyrosine recombinase XerC"
MMARE11_37720	4.23371	2.08192	0.00483711	NAD-dependent aldehyde dehydrogenase"
MMARE11_48830	3.83196	1.93808	0.00483716	acyl-CoA dehydrogenase FadE34"
MMARE11_52840	0.478966	-1.062	0.00484733	conserved hypothetical membrane protein"
MMARE11_46310	0.316589	-1.65932	0.00485212	hypothetical membrane protein"
MMARE11_19800	5.2024	2.37918	0.0048557	hypothetical protein"
MMARE11_48530	1.96997	0.978176	0.00485768	electron transfer protein FdxB"
MMARE11_25970	1.46709	0.552961	0.00487006	conserved membrane protein"
MMARE11_05760	0.435597	-1.19893	0.00487692	conserved protein"
MMARE11_00720	0.33903	-1.56051	0.00487739	single-strand binding protein Ssb"
MMARE11_34520	3.65927	1.87155	0.00492927	conserved hypothetical protein"
MMARE11_18770	0.216627	-2.20672	0.0049377	acyl-CoA dehydrogenase FadE34_1"
MMARE11_03260	2.51515	1.33064	0.00497126	conserved hypothetical protein"
MMARE11_47150	4.31922	2.11077	0.00497555	integral membrane drug efflux protein"
MMARE11_17310	0.562756	-0.829418	0.00499191	50S ribosomal protein L19 RplS"
MMARE11_23420	1.82549	0.86828	0.00500087	cutinase Cut1"
MMARE11_41540	2.1247	1.08726	0.00504256	transcriptional regulatory protein (probably
MMARE11_49020	0.556818	-0.844723	0.00505912	conserved membrane protein"
MMARE11_02510	3.06477	1.61578	0.0050721	conserved secreted protein"
MMARE11_08130	2.89227	1.5322	0.00509137	GabA permease (gamma-aminobutyrate permease)
MMARE11_22610	0.402883	-1.31157	0.00510641	SAM-dependent methyltransferase"
MMARE11_12230	0.393236	-1.34653	0.00512344	conserved protein"
MMARE11_33580	2.79774	1.48426	0.00514156	conserved hypothetical protein"
MMARE11_01540	12.1887	3.60747	0.00515253	glutamate decarboxylase"
MMARE11_08880	2.80294	1.48694	0.0051599	cytochrome P450 135B4 Cyp135B4"
MMARE11_02630	16.4272	4.03802	0.00520371	conserved protein"
MMARE11_08390	3.1067	1.63538	0.00520534	conserved protein"
MMARE11_20200	0.368902	-1.43869	0.00520838	conserved hypothetical protein"
MMARE11_39440	2.36291	1.24056	0.00523603	conserved hypothetical protein"
MMARE11_17210	2.67362	1.4188	0.00523708	transmembrane serine/threonine-protein kinase I
MMARE11_39060	0.161821	-2.62753	0.00525992	conserved hypothetical protein"
MMARE11_40970	2.66199	1.4125	0.00527929	hypothetical protein"
MMARE11_17030	0.464496	-1.10626	0.00529439	ribonuclease III Rnc"
MMARE11_28290	2.15011	1.10441	0.00531441	cutinase precursor"
MMARE11_18860	1.88741	0.916408	0.00533356	dihydrodipicolinate synthase DapA"
MMARE11_34330	5.91753	2.56499	0.00534476	transmembrane alkane 1-monooxygenase AlkB_1"
MMARE11_19680	2.57696	1.36567	0.00536443	conserved hypothetical membrane protein"
MMARE11_28820	7.14278	2.83648	0.00542155	PemK-like protein"
MMARE11_34380	0.557492	-0.842976	0.00545043	chaperone protein HtpG"
MMARE11_08400	3.03478	1.60159	0.00545485	conserved hypothetical membrane protein"
MMARE11_48870	19.6273	4.29479	0.00554137	ATPase component of an ABC-type transport
MMARE11_32380	1.35683	0.440243	0.0055431	meromycolate extension acyl carrier protein
MMARE11_16720	3.65561	1.87011	0.00554432	formyltetrahydrofolate deformylase PurU"
MMARE11_31040	1.44806	0.534124	0.00556344	conserved hypothetical membrane protein"
MMARE11_21410	0.651126	-0.618992	0.00557912	aminoglycosides/tetracycline-transport integral
MMARE11_17020	0.560258	-0.835836	0.00559995	conserved hypothetical protein"
MMARE11_36350	0.217121	-2.20343	0.00563676	PE-PGRS family protein, PE_PGRS2"
MMARE11_01520	35.386	5.14511	0.00565744	conserved hypothetical transmembrane protein"
MMARE11_09200	0.498235	-1.0051	0.00568213	preprotein translocase (tail-anchored membrane
MMARE11_13130	1.73924	0.798458	0.00568399	ATP-dependent RNA helicase RhlE"
MMARE11_21670	3.24364	1.69761	0.00568801	conserved hypothetical membrane protein"
MMARE11_22600	0.121964	-3.03547	0.00571938	hypothetical transmembrane protein"
MMARE11_32410	0.659568	-0.600408	0.00573576	acetyl/propionyl-CoA carboxylase (beta subunit)
MMARE11_35570	3.38943	1.76104	0.00573972	conserved hypothetical protein"
MMARE11_09960	3.40292	1.76677	0.00575447	transcriptional regulator BetI"
MMARE11_46590	8.29415	3.05209	0.0057694	deaminase"
MMARE11_21100	0.134003	-2.89966	0.00576967	conserved lipoprotein LprF"
MMARE11p_00650	0.128978	-2.95481	0.00577939	WXG100 family type VII secretion target"
MMARE11_03820	0.336525	-1.57121	0.00585663	conserved Mce associated transmembrane protein"
MMARE11_43910	2.24575	1.1672	0.00586446	phosphate-transport integral membrane ABC
MMARE11_07600	0.599009	-0.739351	0.00587559	transcriptional regulatory protein"
MMARE11_50580	1.89699	0.923711	0.00589326	conserved hypothetical dehydrogenase"
MMARE11_07360	0.409142	-1.28933	0.0058982	conserved hypothetical protein"
MMARE11_02580	6.64297	2.73183	0.00591026	conserved hypothetical protein"
MMARE11_44460	0.411223	-1.28201	0.00591677	metal cation transporter ATPase p-type CtpE"
MMARE11_27660	3.59029	1.8441	0.00596934	alpha-L-fucosidase"
MMARE11_33500	2.3488	1.23193	0.00598684	PPE family protein, PPE61_1"
MMARE11_33510	2.3488	1.23193	0.00601108	PPE family protein, PPE61"
MMARE11_03430	2.4403	1.28706	0.00603337	conserved hypothetical protein"
MMARE11_15320	3.70142	1.88808	0.00603425	FAD dependent oxidoreductase"
MMARE11_39030	1.99659	0.997537	0.00605359	ATP synthase a chain AtpB"
MMARE11_38840	0.598357	-0.740921	0.0060984	acetyl-CoA acetyltransferase FadA4"
MMARE11_20520	0.320266	-1.64266	0.00614643	Holliday junction DNA helicase RuvB"
MMARE11_24760	0.108604	-3.20285	0.00616974	putative glycosyl transferase"
MMARE11_00730	0.356062	-1.4898	0.00621337	30S ribosomal protein S18-1 RpsR1"
MMARE11_00830	5.23718	2.38879	0.0062589	conserved transmembrane transport protein,
MMARE11p_00040	3.38264	1.75815	0.00625943	hypothetical protein"
MMARE11_22370	0.19906	-2.32873	0.00630825	conserved hypothetical methyltransferase"
MMARE11_04170	4.64436	2.21548	0.00631717	enoyl-CoA hydratase, EchA8_4"
MMARE11_19070	0.211033	-2.24446	0.00637335	conserved hypothetical membrane protein"
MMARE11_04560	0.313599	-1.67301	0.00637972	conserved lipoprotein LpqI"
MMARE11_51840	0.63426	-0.656854	0.00638852	propionyl-CoA carboxylase beta chain 4 AccD4_1"
MMARE11_25320	0.682594	-0.5509	0.00642942	conserved transmembrane ATP-binding protein ABC
MMARE11_43750	0.269754	-1.89028	0.00644727	PE-PGRS family protein"
MMARE11_27030	2.35403	1.23513	0.00644807	cytochrome P450 125A6 Cyp125A6"
MMARE11_02470	2.22638	1.1547	0.00646422	cation transporter p-type ATPase a CtpA"
MMARE11_05060	0.428373	-1.22306	0.0064736	conserved transmembrane protein"
MMARE11_01280	3.94827	1.98122	0.00651097	transcriptional regulatory protein (probably
MMARE11_21120	0.195348	-2.35588	0.00653715	chalcone/stilbene synthase"
MMARE11_02620	34.68	5.11603	0.00654134	50S ribosomal protein L28 RpmB2"
MMARE11_48820	5.40493	2.43428	0.00658548	conserved hypothetical secreted protein"
MMARE11_44010	2.11857	1.08309	0.00659652	hypothetical protein"
MMARE11_28660	3.06095	1.61398	0.00662583	1-aminocyclopropane-1-carboxylate deaminase"
MMARE11_05630	0.396156	-1.33586	0.00662713	conserved hypothetical protein"
MMARE11_43940	8.70699	3.12217	0.0066523	conserved hypothetical protein"
MMARE11p_00680	0.161263	-2.63251	0.00665655	type VII secretion integral membrane protein
MMARE11_16020	0.434095	-1.20392	0.00666097	transferase"
MMARE11_28120	2.51246	1.3291	0.00667317	conserved hypothetical protein"
MMARE11_22940	2.68838	1.42674	0.00667981	hypothetical protein"
MMARE11_35750	0.419458	-1.2534	0.00671118	glycyl-tRNA synthetase GlyS"
MMARE11_15780	24.2616	4.60061	0.00675298	hydrogenase HycP"
MMARE11_14350	0.299204	-1.7408	0.00680181	conserved hypothetical protein"
MMARE11_12020	4.59281	2.19938	0.00681051	periplasmic phosphate-binding lipoprotein
MMARE11_09980	2.2525	1.17153	0.00681852	arylsulfatase AtsA"
MMARE11_40890	2.06703	1.04756	0.00685636	ferredoxin FdxC"
MMARE11_24370	10.2925	3.36352	0.00693716	transferase"
MMARE11_03060	5.00878	2.32446	0.00694274	linoleoyl-CoA desaturase, DesA3_2"
MMARE11_23640	1.98509	0.989206	0.00695707	conserved protein"
MMARE11_16160	3.28472	1.71577	0.00700499	regulatory protein"
MMARE11_41220	0.3646	-1.45561	0.00704557	alpha-methylacyl-CoA racemase Mcr"
MMARE11_30140	5.36121	2.42256	0.00704995	conserved lipoprotein, LppK"
MMARE11_51900	0.337173	-1.56844	0.00705139	conserved transmembrane protein"
MMARE11_22020	3.34269	1.74101	0.00710699	transcriptional regulatory protein"
MMARE11_06200	2.0121	1.00871	0.00715886	Mg2+ transport transmembrane protein MgtE"
MMARE11_44220	4.1214	2.04313	0.0072695	site-specific tyrosine recombinase XerC"
MMARE11_44430	0.381478	-1.39033	0.00726953	conserved protein"
MMARE11_26060	3.39909	1.76515	0.00727737	conserved hypothetical membrane protein"
MMARE11_22750	0.330254	-1.59835	0.0072862	UDP-glycosyltransferase"
MMARE11_33640	2.82202	1.49673	0.00729987	conserved hypothetical regulatory protein"
MMARE11_28360	4.33024	2.11445	0.00731751	ferric uptake regulation protein FurA"
MMARE11_33310	0.396513	-1.33456	0.00742903	conserved hypothetical transcriptional
MMARE11_41870	0.500115	-0.999667	0.00747704	fructose 1,6-bisphosphatase GlpX"
MMARE11_13490	0.343492	-1.54165	0.00750214	conserved hypothetical protein"
MMARE11_49720	3.4605	1.79098	0.00750499	phosphoserine phosphatase SerB"
MMARE11_27070	2.13069	1.09132	0.00751475	conserved hypothetical protein"
MMARE11_10440	0.576767	-0.79394	0.00752151	30S ribosomal protein S13, RpsM"
MMARE11_23800	0.579099	-0.788118	0.00755602	phenylalanyl-tRNA synthetase, beta chain PheT"
MMARE11_36220	0.369388	-1.43679	0.00757417	sulfate-transport ATP-binding protein ABC
MMARE11_49960	2.07369	1.0522	0.0076307	conserved membrane protein"
MMARE11_28740	0.422973	-1.24136	0.00763667	conserved hypothetical protein"
MMARE11_17320	0.581693	-0.781671	0.00763874	signal peptidase I LepB"
MMARE11_21510	0.462188	-1.11345	0.00764959	conserved membrane protein"
MMARE11_47910	0.269124	-1.89366	0.00765775	conserved hypothetical alanine and valine rich
MMARE11_12390	0.332095	-1.59033	0.00768587	conserved hypothetical protein"
MMARE11_42040	2.35361	1.23487	0.00774861	conserved protein"
MMARE11_20800	0.449484	-1.15366	0.00779998	aspartyl-tRNA synthetase AspS"
MMARE11_10940	0.534808	-0.902906	0.00781878	conserved hypothetical protein"
MMARE11_24240	0.403744	-1.30849	0.00782594	conserved protein"
MMARE11_14680	2.73513	1.45161	0.00787455	transcriptional regulatory protein"
MMARE11_31010	0.524576	-0.930776	0.00787486	conserved proline rich membrane protein"
MMARE11_16610	0.394822	-1.34073	0.00789298	ATP-dependent DNA helicase RecG"
MMARE11_30750	0.491197	-1.02562	0.0080301	conserved transmembrane transport protein
MMARE11_31060	2.70861	1.43755	0.008096	conserved lipoprotein LppM"
MMARE11_22160	0.578989	-0.788393	0.00811976	conserved hypothetical secreted protein"
MMARE11_10050	0.521444	-0.939416	0.00813911	30S ribosomal protein S14, RpsN"
MMARE11_22920	0.588834	-0.764068	0.00814024	fatty-acid-CoA ligase, FadD11"
MMARE11_19050	1.58254	0.662238	0.00816914	conserved protein"
MMARE11_39150	1.80476	0.851805	0.00817043	'tRNA-Arg(ccg)'"
MMARE11_41820	5.64202	2.49621	0.00824967	PE-PGRS family protein"
MMARE11_41070	0.254198	-1.97597	0.00831124	conserved hypothetical secreted protein"
MMARE11_31450	0.51895	-0.946331	0.00836582	conserved integral membrane protein"
MMARE11_30130	0.58599	-0.771053	0.0083747	ATPase"
MMARE11_47950	0.471016	-1.08615	0.00837558	MCE-family protein Mce4C"
MMARE11_15370	5.37548	2.42639	0.00839844	hypothetical protein"
MMARE11_25810	2.28136	1.1899	0.00842911	conserved hypothetical protein"
MMARE11_15740	8.51749	3.09043	0.00851381	transcriptional regulatory protein"
MMARE11_41470	2.45453	1.29545	0.00851469	conserved hypothetical membrane protein"
MMARE11_06210	2.96546	1.56826	0.00864135	conserved membrane protein"
MMARE11_19140	2.88301	1.52757	0.00868917	conserved hypothetical integral membrane
MMARE11_37090	0.196687	-2.34602	0.00872155	molybdopterin biosynthesis protein MoeY_1"
MMARE11_41550	3.34758	1.74312	0.00884709	conserved hypothetical protein"
MMARE11_29070	3.83748	1.94016	0.00886031	transcriptional regulatory protein
MMARE11_12270	1.68563	0.753285	0.00888348	conserved hypothetical membrane protein"
MMARE11_16690	0.255858	-1.96658	0.00890706	methyltransferase"
MMARE11_36400	1.75539	0.811789	0.00892443	30S ribosomal protein S20 RpsT"
MMARE11_30910	0.43759	-1.19235	0.00897082	cell division protein FtsQ"
MMARE11_30520	0.359772	-1.47484	0.00902655	putative helicase"
MMARE11_40350	0.0905512	-3.46512	0.00907764	PE-PGRS family protein"
MMARE11_40110	2.28565	1.1926	0.00908097	magnesium and cobalt transport transmembrane
MMARE11_20070	0.376014	-1.41114	0.00911077	fatty-acid-CoA ligase"
MMARE11_33460	3.29438	1.72001	0.00911657	conserved hypothetical hydroxylase"
MMARE11_37020	0.575114	-0.798079	0.00912034	conserved hypothetical protein"
MMARE11_07580	1.43124	0.517268	0.00915411	conserved lipoprotein LprQ"
MMARE11_26930	0.444102	-1.17104	0.00915437	resuscitation-promoting factor-like protein"
MMARE11_00990	0.280081	-1.83609	0.00918822	oxidoreductase"
MMARE11_05190	0.532567	-0.908965	0.00925025	conserved hypothetical proline and threonine
MMARE11_52740	1.6612	0.732229	0.00929506	PPE family protein"
MMARE11_08620	1.90028	0.926213	0.00931245	peptidase heat shock protein X, HspX"
MMARE11_18730	0.0540319	-4.21004	0.0093173	PPE family protein, PPE15_1"
MMARE11_53120	0.255916	-1.96626	0.00935235	glucose-inhibited division protein B Gid"
MMARE11_07640	1.79243	0.841913	0.00935476	two-component sensor histidine kinase SenX3"
MMARE11_43350	0.480938	-1.05608	0.00938303	UTP--glucose-1-phosphate uridylyltransferase
MMARE11_01480	6.27473	2.64955	0.00941253	conserved hypothetical membrane protein"
MMARE11_03640	4.14511	2.05141	0.00944166	conserved hypothetical protein"
MMARE11_48290	4.54634	2.18471	0.00946117	conserved hypothetical protein"
MMARE11_13280	0.380275	-1.39489	0.00946717	NADH pyrophosphatase NudC"
MMARE11_09630	0.607557	-0.718908	0.0094787	30S ribosomal protein S12, RpsL"
MMARE11_46470	3.7853	1.92041	0.00953668	conserved hypothetical protein"
MMARE11_49330	0.391321	-1.35358	0.00954762	dihydropteroate synthase 1 FolP1"
MMARE11_05240	2.06838	1.0485	0.00956227	beta-1,3-glucanase precursor"
MMARE11_36610	0.287083	-1.80046	0.00965332	conserved hypothetical membrane protein"
MMARE11_27900	0.374966	-1.41517	0.00966055	conserved hypothetical membrane protein"
MMARE11_48070	0.490824	-1.02672	0.00966413	acetohydroxyacid synthase IlvX"
MMARE11_09190	0.678135	-0.560355	0.0096704	'tRNA-Trp(cca)'"
[truncated: 673 more rows]

## Sheet: Primers (S8)
Table S8. Primers used in this study. Restriction sites shown in bold
[truncated: 22 more rows]
